# Supplementary material for: Cobalt-catalyzed enantioselective desymmetrizing reductive cyclization of alkynyl cyclodiketones
Source: Royal Society of Chemistry journal article supplement (doi:10.1039/d3sc00119a), 2023-01-01
Supplement: d3sc00119a1.pdf [file d3sc00119a1.pdf]

**Supporting Information for:**

**Cobalt-Catalyzed Enantioselective Desymmetrizing Reductive Cyclization of Alkynyl Cyclodiketones**

Ren-Xiao Liang, Heng-Wei Tang, Jia-Liang Liu, Jian-Feng Xu, Ling-Jia Chen and Yi-Xia Jia

*College of Chemical Engineering, State Key Laboratory Breeding Base of Green-Chemical Synthesis Technology, Zhejiang University of Technology, Chaowang Road 18#, Hangzhou 310014, China*

**Table of contents**

|                                                                                   |      |
|-----------------------------------------------------------------------------------|------|
| 1. General information .....                                                      | S1   |
| 2. Substrate synthesis.....                                                       | S1   |
| 3. General procedure for enantioselective Co-catalyzed reductive cyclization..... | S65  |
| 4. Synthetic transformations .....                                                | S150 |
| 5. Control experiments and formation of by-product <b>3</b> .....                 | S170 |
| 6. Crystal report of compound <b>2n</b> .....                                     | S172 |
| 7. References .....                                                               | S174 |

## 1. General information

Reactions and manipulations involving organometallic or moisture sensitive compounds were carried out under dry nitrogen and glassware dried by heating gun for 5 min prior to use.  $^1\text{H}$  and  $^{13}\text{C}$  NMR spectra were recorded on Bruker AVANCE III 400 MHz, 500 MHz, or 600 MHz using  $\text{CDCl}_3$  as solvent with TMS as internal standard. Anhydrous 1,4-dioxane, THF, MTBE and toluene were freshly distilled over Na and benzophenone. Anhydrous DCM and DMF were freshly distilled over  $\text{CaH}_2$ . MeOH was freshly distilled with magnesium and iodine. Melting points were measured on a Büchi Melting Point B-545 apparatus and uncorrected. Commercial reagents were used as received without further purification unless otherwise noticed. HRMS were recorded on Thermo Scientific LTQ Orbitrap XL or Agilent 6210 TOF LC/MS mass spectrometer, and in the EI mode on Waters GCT Premier TOF MS. Optical rotations were determined using a Rudolph Autopol IV polarimeter. HPLC analyses were performed using Agilent 1260 chromatography. Chiralpak OJ-H column were purchased from Daicel Chemical Industries, LTD. Amylose-2, Cellulose-1 and Cellulose-2 columns were purchased from Phenomenex. Column chromatography was carried out using silica gel (200-300 mesh). Ligands **L1-L8** were purchased or prepared according to the literature procedures and used directly as received.<sup>1</sup>

## 2. Substrate synthesis

Substrates **1** were prepared according to the known procedures.

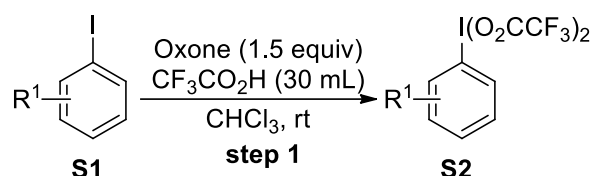

**Step 1:**<sup>2</sup> To a 100 mL flask was charged with Oxone (15 mmol, 1.5 equiv),  $\text{CF}_3\text{CO}_2\text{H}$  (30 mL), and  $\text{CHCl}_3$  (30 mL). The corresponding aryl iodide (**S1**, 10 mmol) was then injected dropwise via syringe at room temperature. After stirring for 2 h at room temperature, the solvent was removed under vacuo. The residue was then dissolved in  $\text{CHCl}_3$  (10 mL) and the inorganic salts were filtered. After concentration, the crude product **S2** was obtained and used in the next step without further purification.

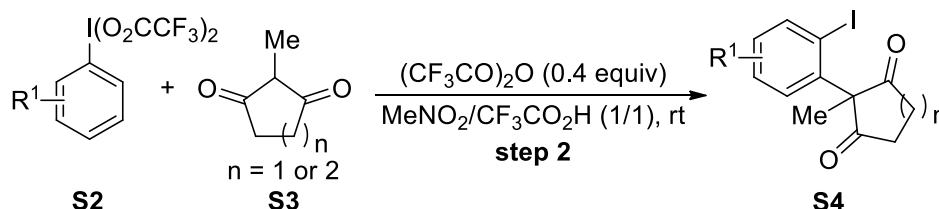

**Step 2:**<sup>3</sup> To a 100 mL flask was charged with  $\text{ArI}(\text{O}_2\text{CCF}_3)_2$  (**S2**, 6.25 mmol),  $\text{MeNO}_2$  (10 mL),  $\text{CF}_3\text{CO}_2\text{H}$  (10 mL), and  $(\text{CF}_3\text{CO})_2\text{O}$  (1.9 mmol, 260  $\mu\text{L}$ ). The mixture was stirred at room temperature for 15 min. Cyclic 1,3-diketone (**S3**, 5.0 mmol) was then added and the resulting mixture was stirred at room temperature. When the reaction

was completed (monitored by TLC), the mixture was concentrated under reduced pressure. The residue was purified by chromatography on silica gel, eluting with ethyl acetate/petroleum ether 1:5 (v/v), to afford compounds **S4**.

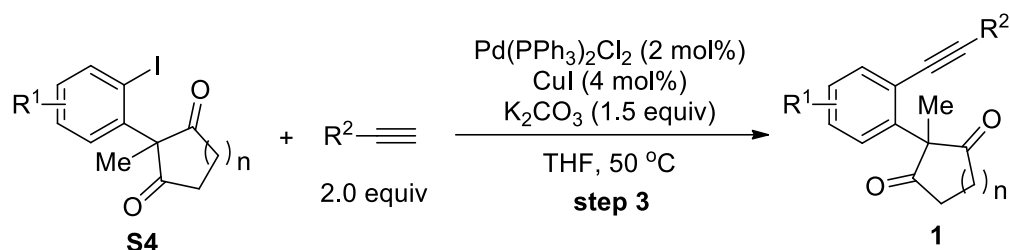

**Step 3:**<sup>4</sup> To a 100 mL flask was charged with Pd(PPh<sub>3</sub>)<sub>2</sub>Cl<sub>2</sub> (2 mol%, 0.1 mmol) CuI (4 mol%, 0.2 mmol), **S4** (1.0 equiv, 5 mmol), and K<sub>2</sub>CO<sub>3</sub> (1.5 equiv, 7.5 mmol). A solution of alkynes (1.5 equiv, 7.5 mmol) in THF (10 mL) was then introduced via syringe under N<sub>2</sub> atmosphere. The resulting mixture was stirred at 60 °C. When **S4** was completely consumed (monitored by TLC), the mixture was concentrated under reduced pressure. The residue was then purified by chromatography on silica gel, eluting with ethyl acetate/petroleum ether 1:5 (v/v), to give substrates **1**.

**2-Methyl-2-(2-(phenylethynyl)phenyl)cyclopentane-1,3-dione (1a)**

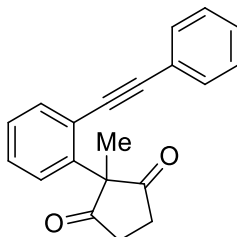

Purified by chromatography on silica gel, eluting with ethyl acetate/petroleum ether 1:5 (v/v); white solid, Mp = 151-152 °C; 73% yield (for the last step); <sup>1</sup>H NMR (500 MHz, CDCl<sub>3</sub>) δ 7.54 (d, *J* = 7.5 Hz, 1H), 7.49-7.44 (m, 2H), 7.41 (t, *J* = 3.5 Hz, 2H), 7.38-7.30 (m, 4H), 3.03-2.92 (m, 2H), 2.73-2.62 (m, 2H), 1.60 (s, 3H). <sup>13</sup>C NMR (125 MHz, CDCl<sub>3</sub>) δ 213.2, 140.7, 133.0, 131.4, 129.3, 128.9, 128.6, 128.1, 127.9, 121.9, 95.1, 89.7, 62.5, 35.4, 19.7. HRMS *m/z* (ESI<sup>+</sup>): Calculated for C<sub>20</sub>H<sub>17</sub>O<sub>2</sub><sup>+</sup> ([M+H]<sup>+</sup>) 289.1223, found 289.1225.

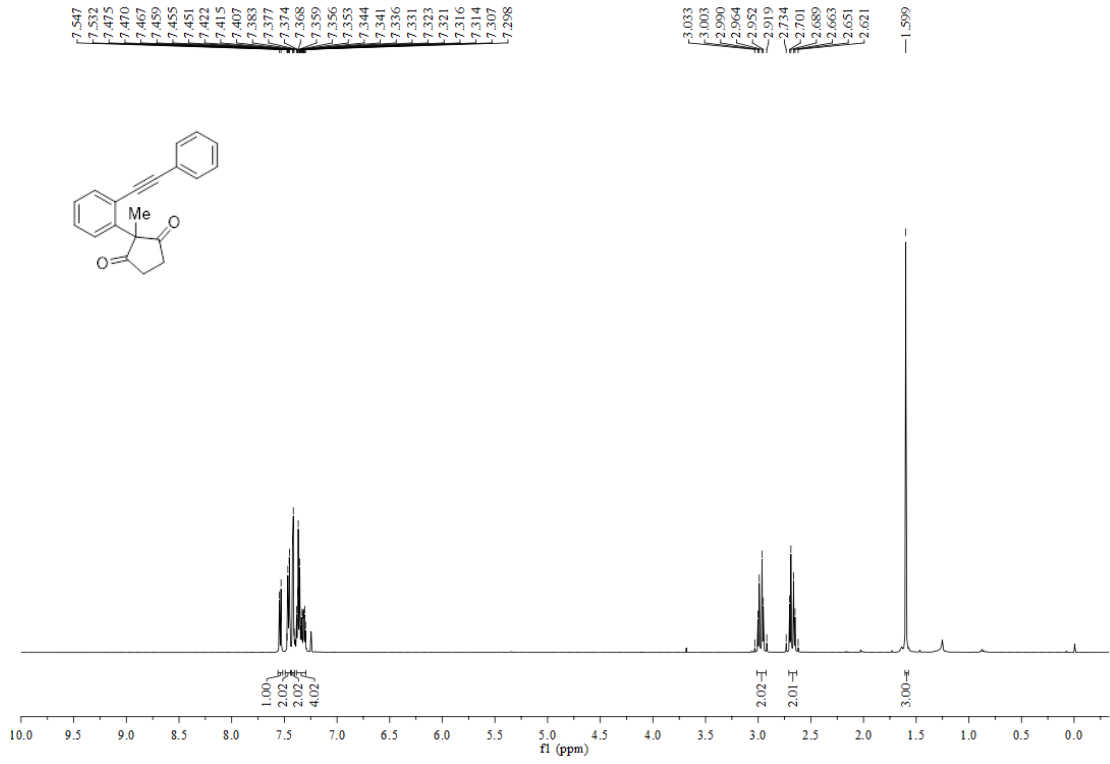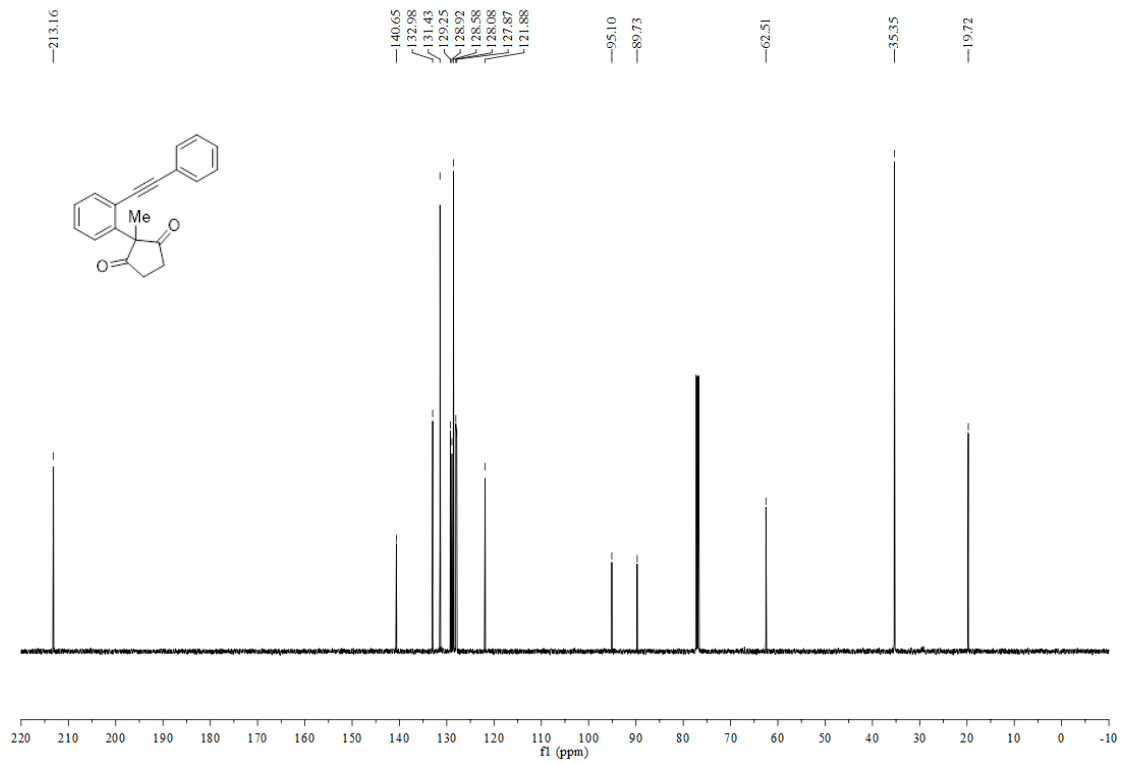



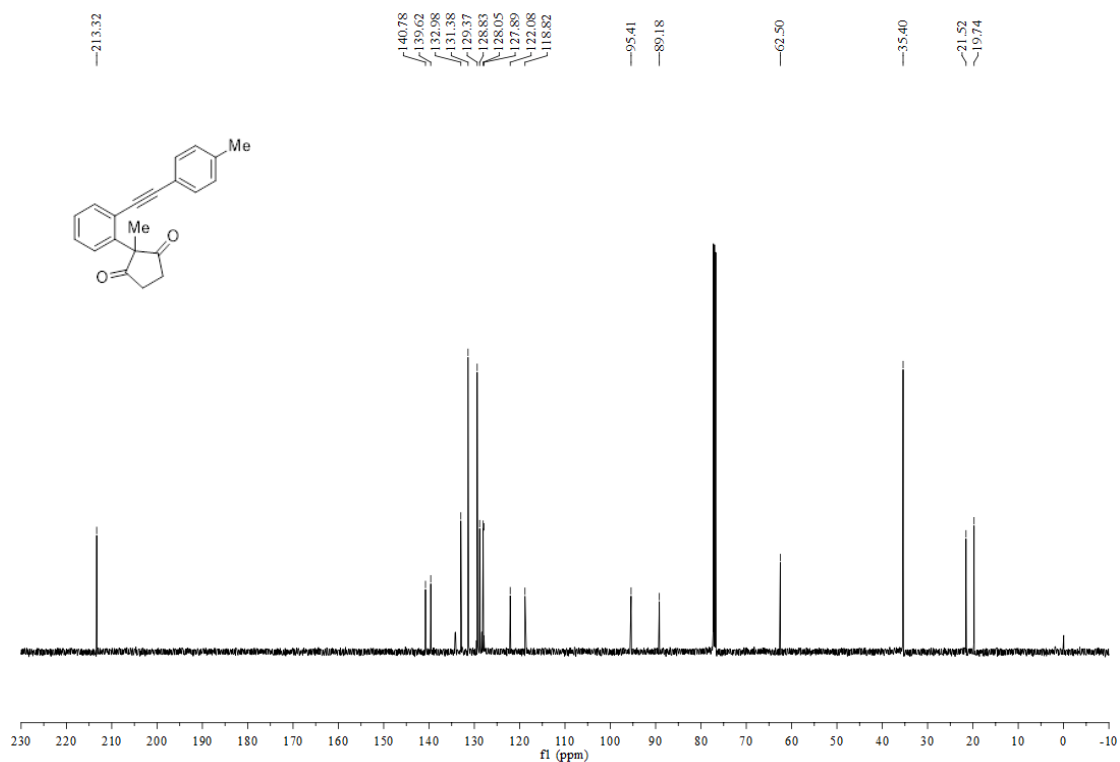

**2-(2-((4-Methoxyphenyl)ethynyl)phenyl)-2-methylcyclopentane-1,3-dione (1c)**

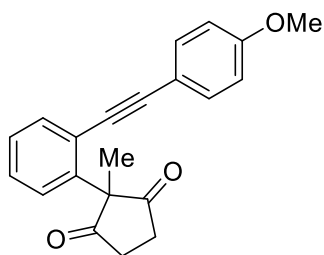

Purified by chromatography on silica gel, eluting with ethyl acetate/petroleum ether 1:5 (v/v); white solid, Mp = 179-180 °C; 81% yield (for the last step);  $^1\text{H}$  NMR (500 MHz,  $\text{CDCl}_3$ )  $\delta$  7.54 (d,  $J$  = 7.5 Hz, 1H), 7.41 (d,  $J$  = 6.5 Hz, 4H), 7.33-7.30 (m, 1H), 6.89 (d,  $J$  = 9.0 Hz, 2H), 3.83 (s, 3H), 3.04-2.92 (m, 2H), 2.73-2.62 (m, 2H), 1.61 (s, 3H).  $^{13}\text{C}$  NMR (125 MHz,  $\text{CDCl}_3$ )  $\delta$  213.3, 160.4, 140.9, 133.01, 132.99, 128.8, 128.0, 127.9, 122.2, 114.2, 113.9, 95.3, 88.6, 62.5, 55.3, 35.4, 19.7. HRMS  $m/z$  (ESI $^+$ ): Calculated for  $\text{C}_{21}\text{H}_{18}\text{O}_3\text{Na}^+$  ( $[\text{M}+\text{Na}]^+$ ) 341.1148, found 341.1150.

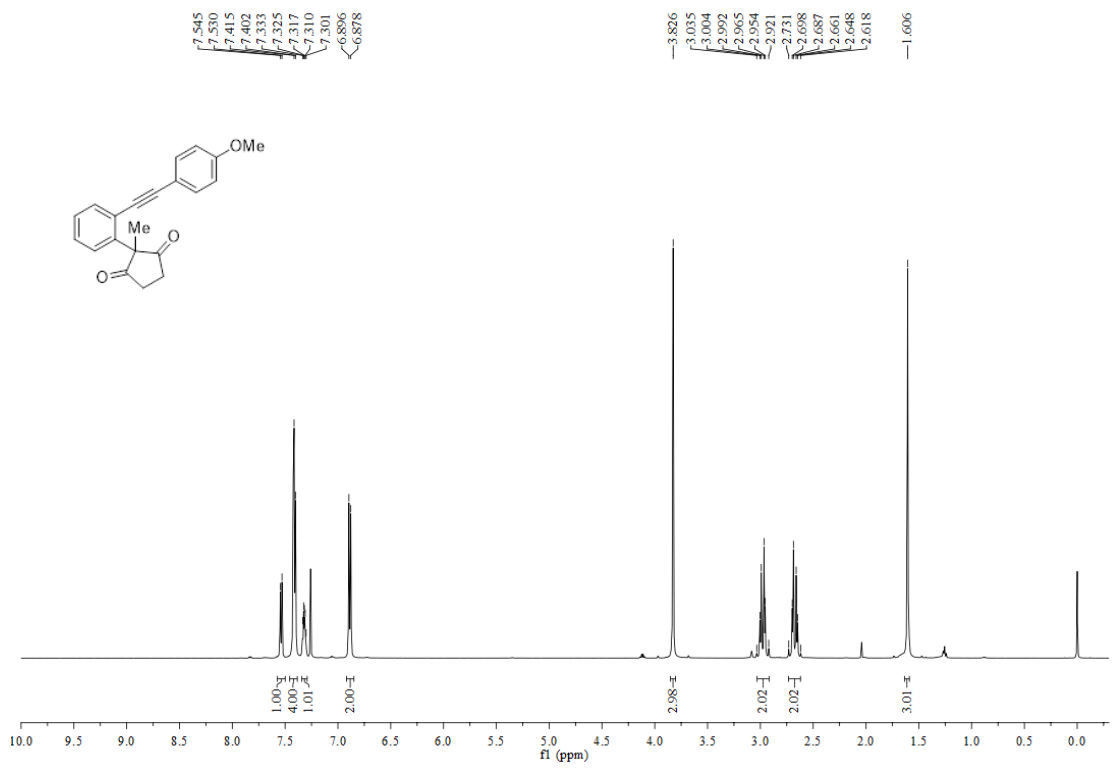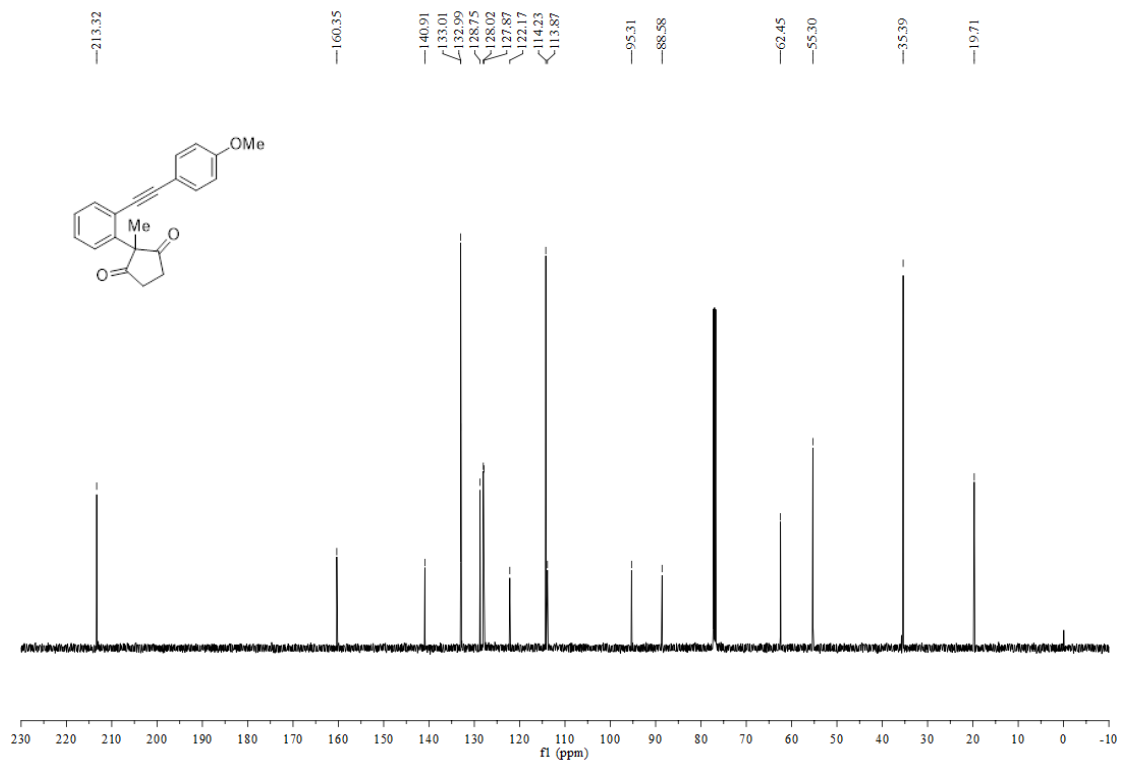

**2-(2-((4-Chlorophenyl)ethynyl)phenyl)-2-methylcyclopentane-1,3-dione (1d)**

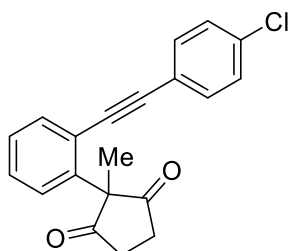

Purified by chromatography on silica gel, eluting with ethyl acetate/petroleum ether 1:5 (v/v); brown solid, Mp = 170-171 °C; 59% yield (for the last step); <sup>1</sup>H NMR (500 MHz, CDCl<sub>3</sub>) δ 7.54 (d, *J* = 7.5 Hz, 1H), 7.47-7.42 (m, 2H), 7.42-7.38 (m, 2H), 7.37-7.32 (m, 3H), 3.07-2.96 (m, 2H), 2.71-2.59 (m, 2H), 1.62 (s, 3H). <sup>13</sup>C NMR (125 MHz, CDCl<sub>3</sub>) δ 213.0, 140.6, 135.5, 133.1, 132.7, 129.2, 129.0, 128.2, 128.0, 121.6, 120.4, 93.9, 90.6, 62.6, 35.4, 19.8. HRMS *m/z* (ESI<sup>+</sup>): Calculated for C<sub>20</sub>H<sub>15</sub>ClO<sub>2</sub>Na<sup>+</sup> ([M+Na]<sup>+</sup>) 345.0653, found 345.0655.

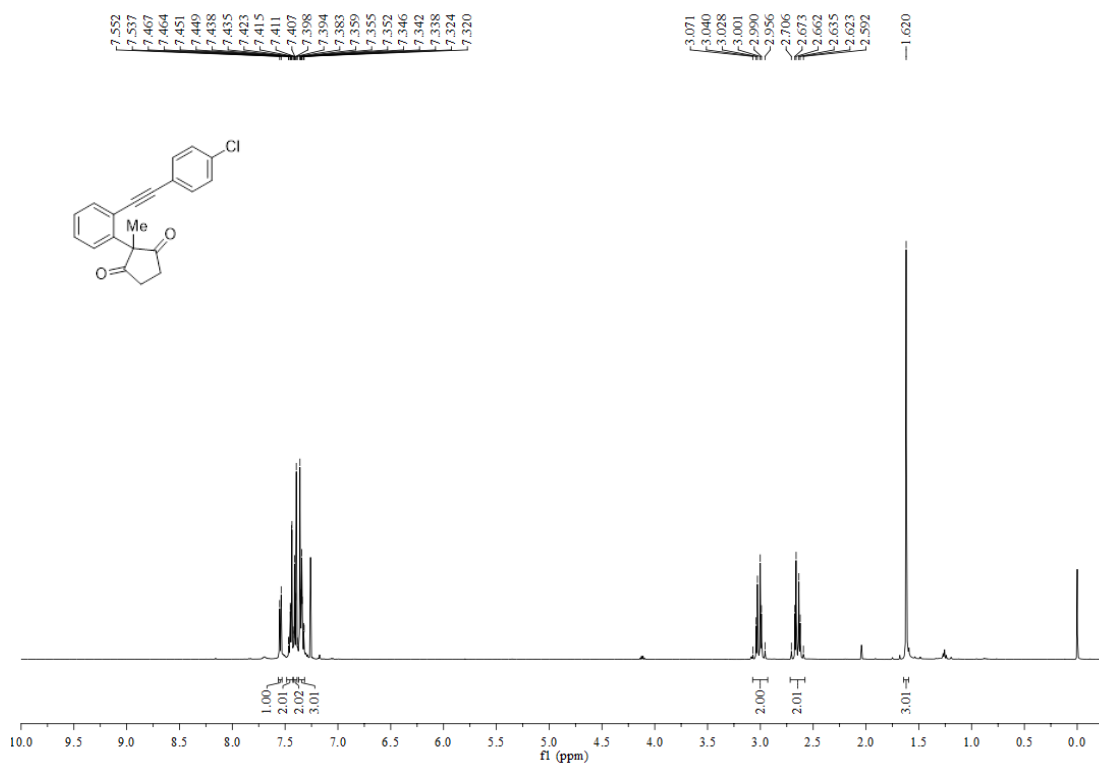



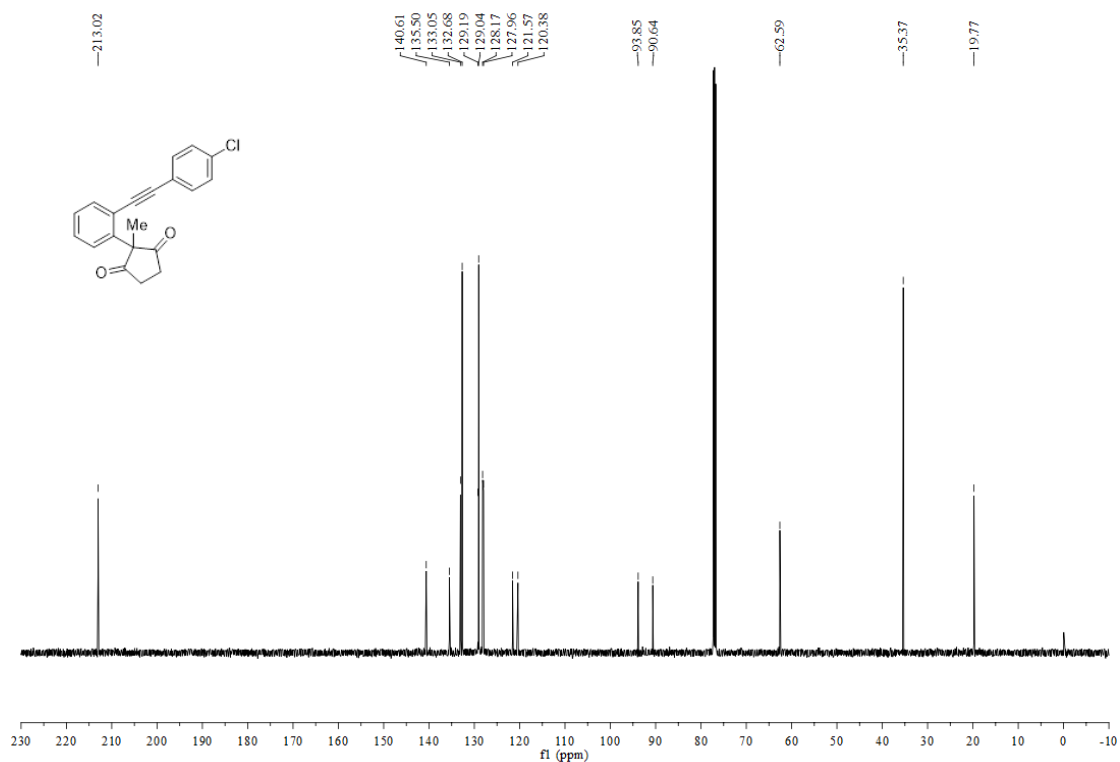

**2-(2-((4-Fluorophenyl)ethynyl)phenyl)-2-methylcyclopentane-1,3-dione (1e)**

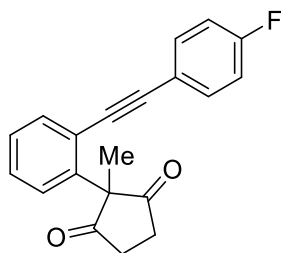

Purified by chromatography on silica gel, eluting with ethyl acetate/petroleum ether 1:5 (v/v); yellow solid, Mp = 170-171 °C; 68% yield (for the last step); <sup>1</sup>H NMR (500 MHz, CDCl<sub>3</sub>) δ 7.54 (d, *J* = 7.5 Hz, 1H), 7.48-7.42 (m, 4H), 7.35-7.32 (m, 1H), 7.09-7.05 (m, 2H), 3.07-2.95 (m, 2H), 2.71-2.59 (m, 2H), 1.62 (s, 3H). <sup>13</sup>C NMR (125 MHz, CDCl<sub>3</sub>) δ 213.1, 163.0 (d, *J* = 248.8 Hz), 140.7, 133.5 (d, *J* = 7.5 Hz), 133.1, 129.1, 128.1, 127.9, 121.7, 118.0 (d, *J* = 3.8 Hz), 116.0 (d, *J* = 22.5 Hz), 94.0, 89.5, 62.6, 35.4, 19.7. HRMS *m/z* (ESI<sup>+</sup>): Calculated for C<sub>20</sub>H<sub>15</sub>FO<sub>2</sub>Na<sup>+</sup> ([M+Na]<sup>+</sup>) 329.0948, found 329.0950.

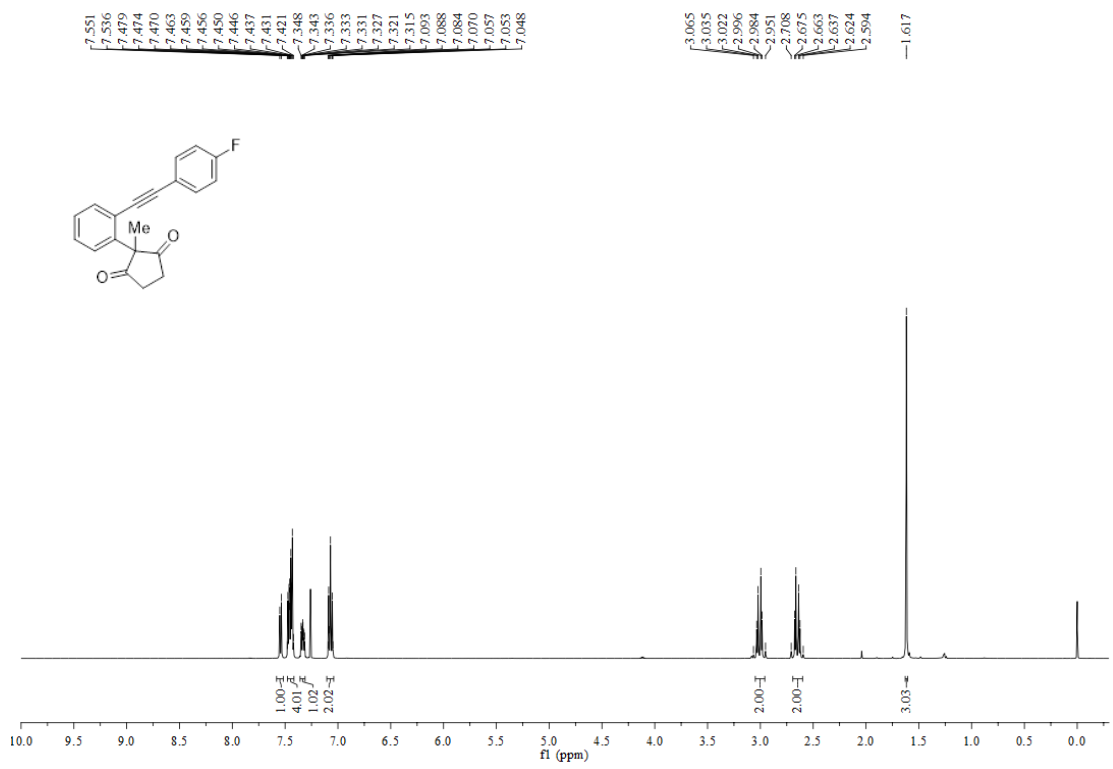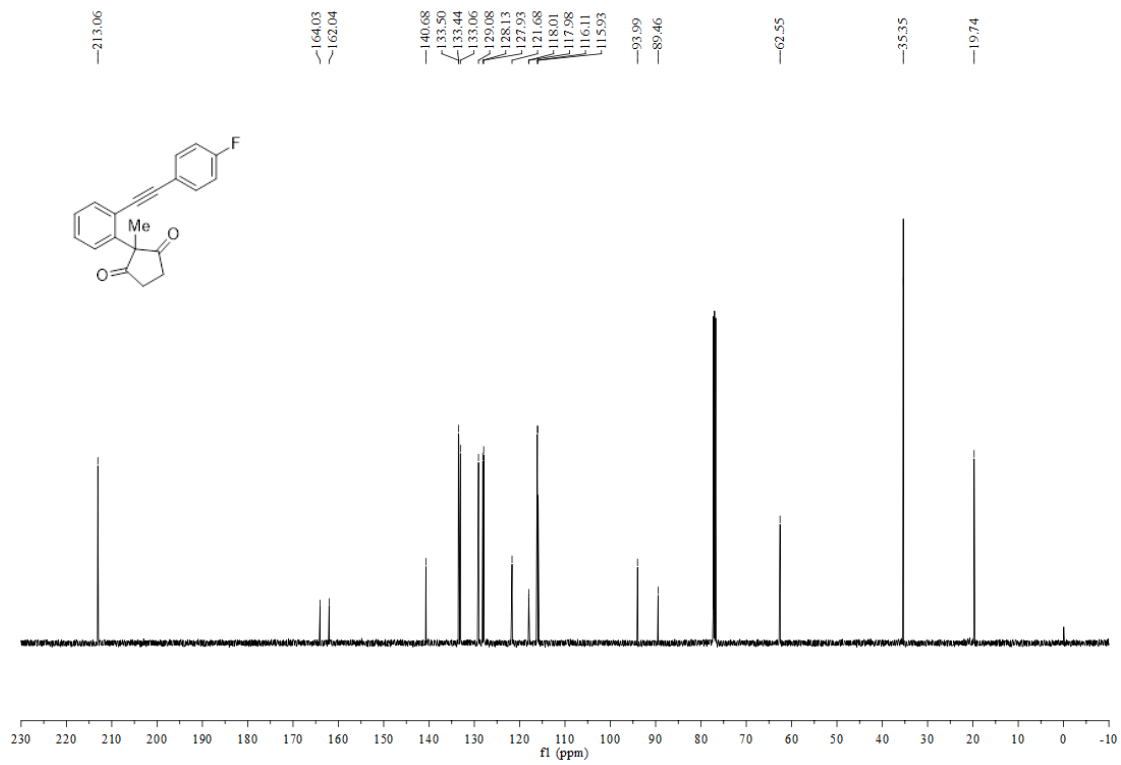

**Methyl 4-((2-(1-methyl-2,5-dioxocyclopentyl)phenyl)ethynyl)benzoate (1f)**

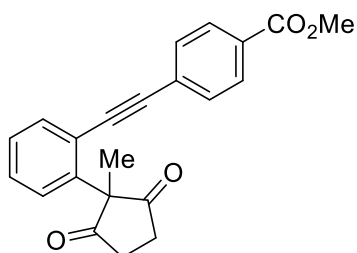

Purified by chromatography on silica gel, eluting with ethyl acetate/petroleum ether 1:5 (v/v); yellow solid, Mp = 177-178 °C; 67% yield (for the last step);  $^1\text{H}$  NMR (500 MHz,  $\text{CDCl}_3$ )  $\delta$  8.04 (d,  $J = 8.5$  Hz, 2H), 7.56 (d,  $J = 7.5$  Hz, 1H), 7.53 (d,  $J = 8.5$  Hz, 2H), 7.48-7.43 (m, 2H), 7.35 (t,  $J = 7.0$  Hz, 1H), 3.93 (s, 3H), 3.08-2.97 (m, 2H), 2.73-2.61 (m, 2H), 1.63 (s, 3H).  $^{13}\text{C}$  NMR (125 MHz,  $\text{CDCl}_3$ )  $\delta$  212.9, 166.2, 140.4, 133.0, 131.3, 130.5, 129.7, 129.3, 128.2, 128.0, 126.4, 121.4, 94.0, 92.3, 62.6, 52.3, 35.3, 19.8. HRMS  $m/z$  (ESI $^+$ ): Calculated for  $\text{C}_{22}\text{H}_{19}\text{O}_4^+$  ( $[\text{M}+\text{H}]^+$ ) 347.1278, found 347.1281.

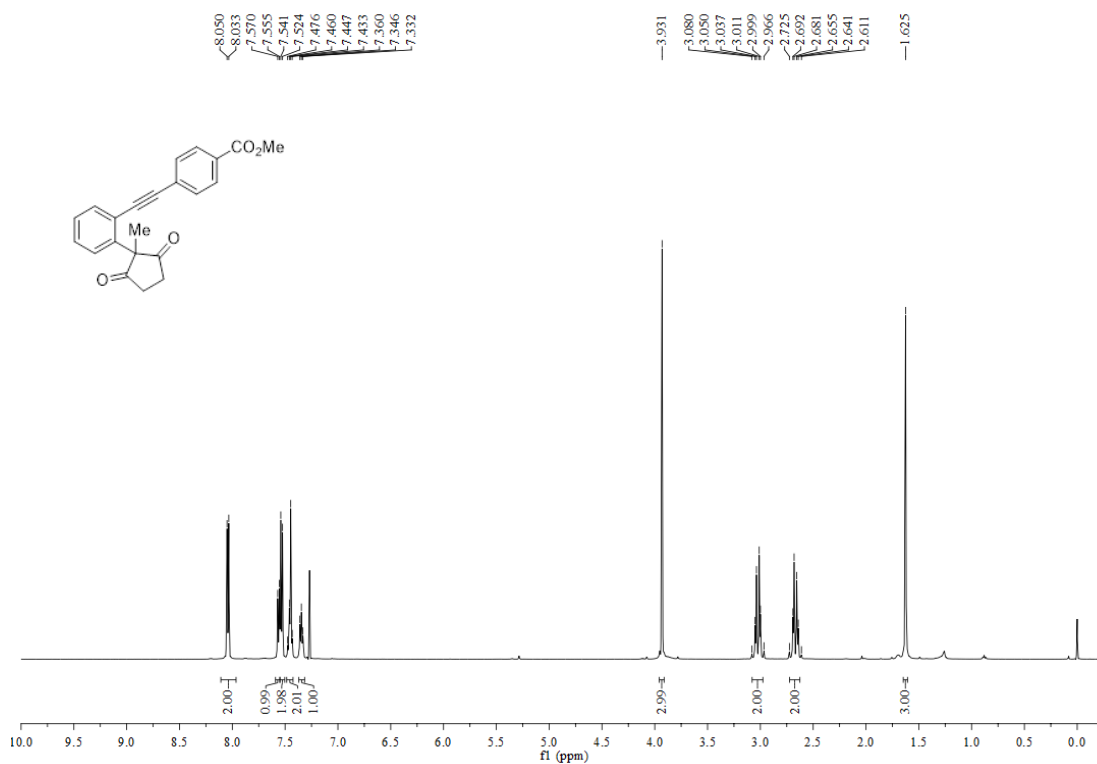

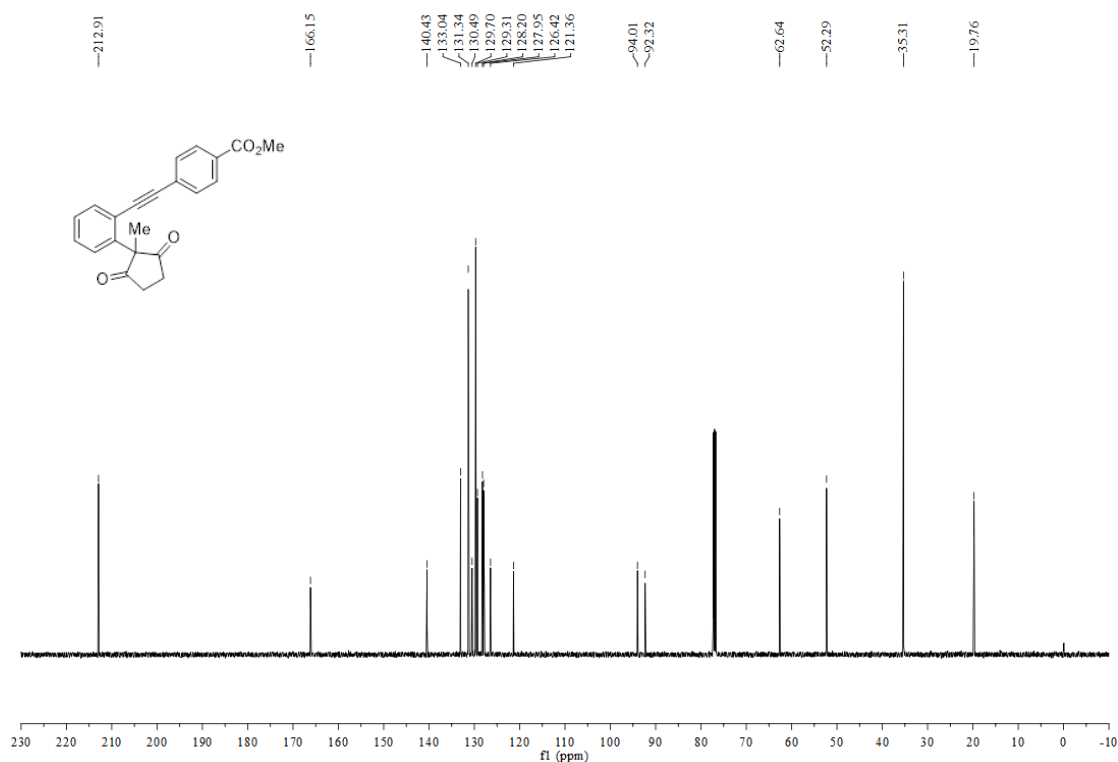

**2-Methyl-2-(2-(*m*-tolylethynyl)phenyl)cyclopentane-1,3-dione (1g)**

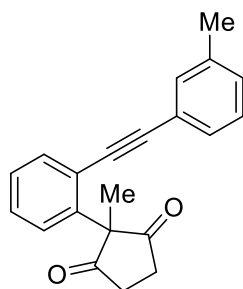

Purified by chromatography on silica gel, eluting with ethyl acetate/petroleum ether 1:5 (v/v); yellow solid, Mp = 153-154 °C; 72% yield (for the last step);  $^1\text{H}$  NMR (500 MHz,  $\text{CDCl}_3$ )  $\delta$  7.54 (d,  $J$  = 7.5 Hz, 1H), 7.43 (d,  $J$  = 4.0 Hz, 2H), 7.35-7.31 (m, 1H), 7.30-7.23 (m, 3H), 7.20 (d,  $J$  = 7.5 Hz, 1H), 3.05-2.93 (m, 2H), 2.76-2.64 (m, 2H), 2.35 (s, 3H), 1.61 (s, 3H).  $^{13}\text{C}$  NMR (125 MHz,  $\text{CDCl}_3$ )  $\delta$  213.3, 140.7, 138.4, 133.0, 132.0, 130.2, 128.9, 128.54, 128.48, 128.1, 127.9, 122.0, 121.7, 95.4, 89.4, 62.5, 35.4, 21.2, 19.7. HRMS  $m/z$  (ESI<sup>+</sup>): Calculated for  $\text{C}_{21}\text{H}_{19}\text{O}_2^+$  ( $[\text{M}+\text{H}]^+$ ) 303.1380, found 303.1382.

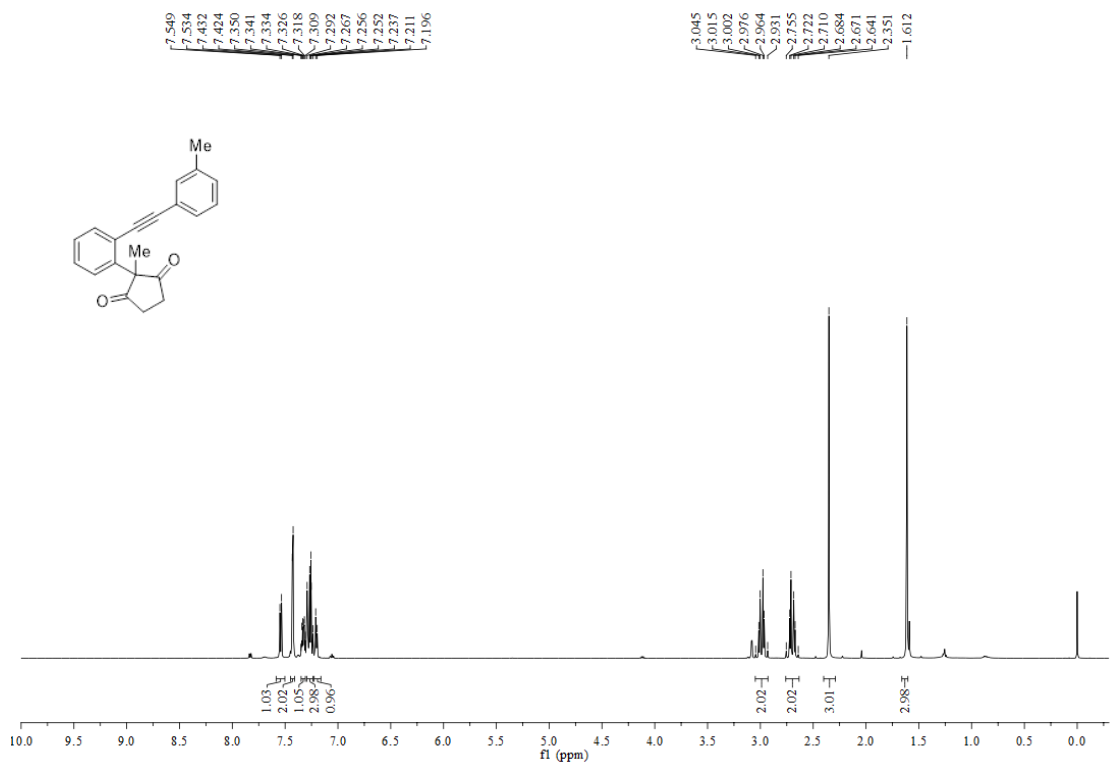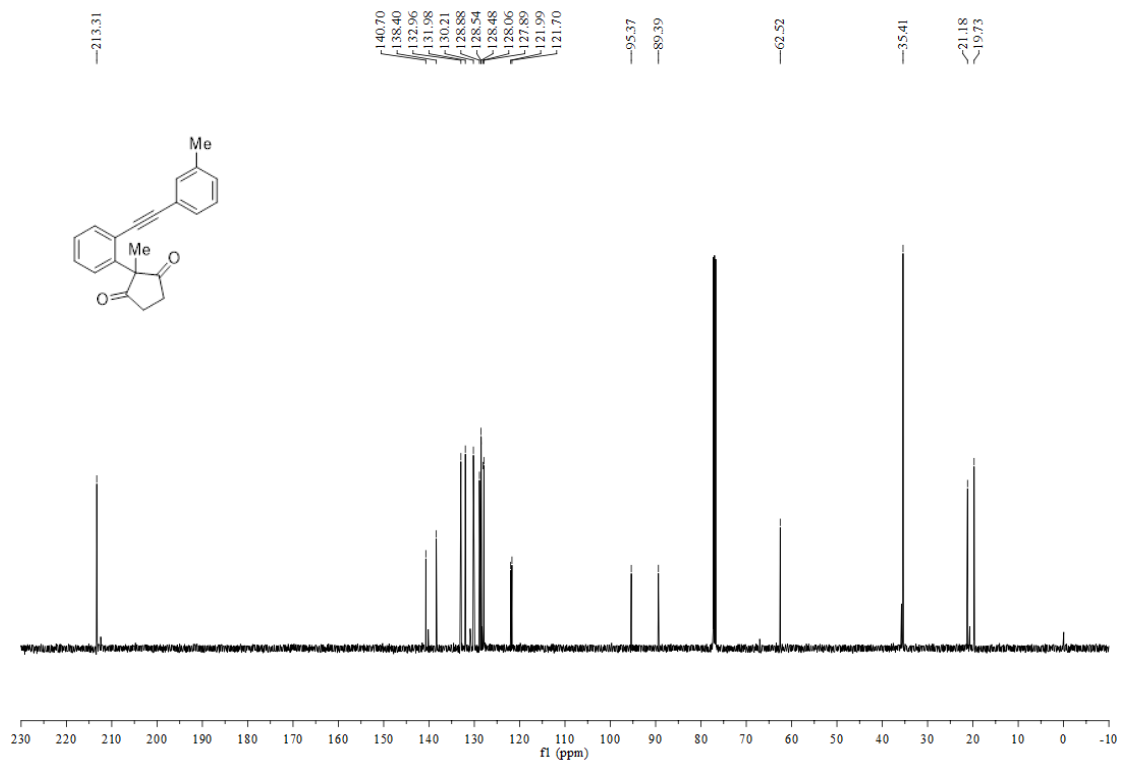

**2-(2-((3-Chlorophenyl)ethynyl)phenyl)-2-methylcyclopentane-1,3-dione (1h)**

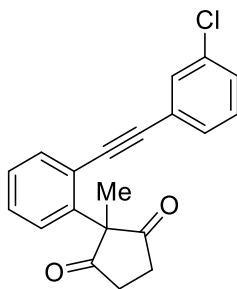

Purified by chromatography on silica gel, eluting with ethyl acetate/petroleum ether 1:5 (v/v); yellow solid, Mp = 129-130 °C; 65% yield (for the last step);  $^1\text{H}$  NMR (500 MHz,  $\text{CDCl}_3$ )  $\delta$  7.55 (d,  $J = 7.0$  Hz, 1H), 7.47-7.43 (m, 3H), 7.39-7.29 (m, 4H), 3.09-2.98 (m, 2H), 2.74-2.62 (m, 2H), 1.63 (s, 3H).  $^{13}\text{C}$  NMR (125 MHz,  $\text{CDCl}_3$ )  $\delta$  213.0, 140.5, 134.5, 133.1, 131.2, 129.9, 129.6, 129.3, 128.2, 128.0, 123.6, 121.4, 93.5, 90.7, 62.6, 35.4, 19.8. HRMS  $m/z$  (ESI $^+$ ): Calculated for  $\text{C}_{20}\text{H}_{15}\text{ClO}_2\text{Na}^+$  ( $[\text{M}+\text{Na}]^+$ ) 345.0653, found 345.0653.

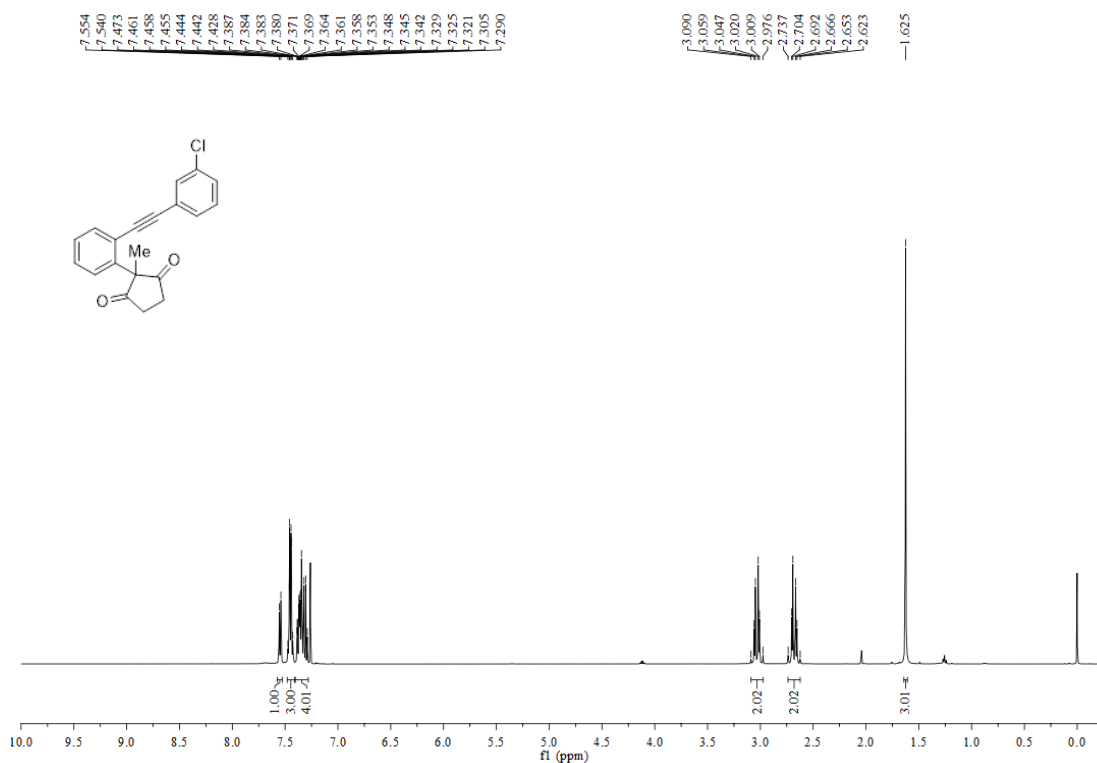

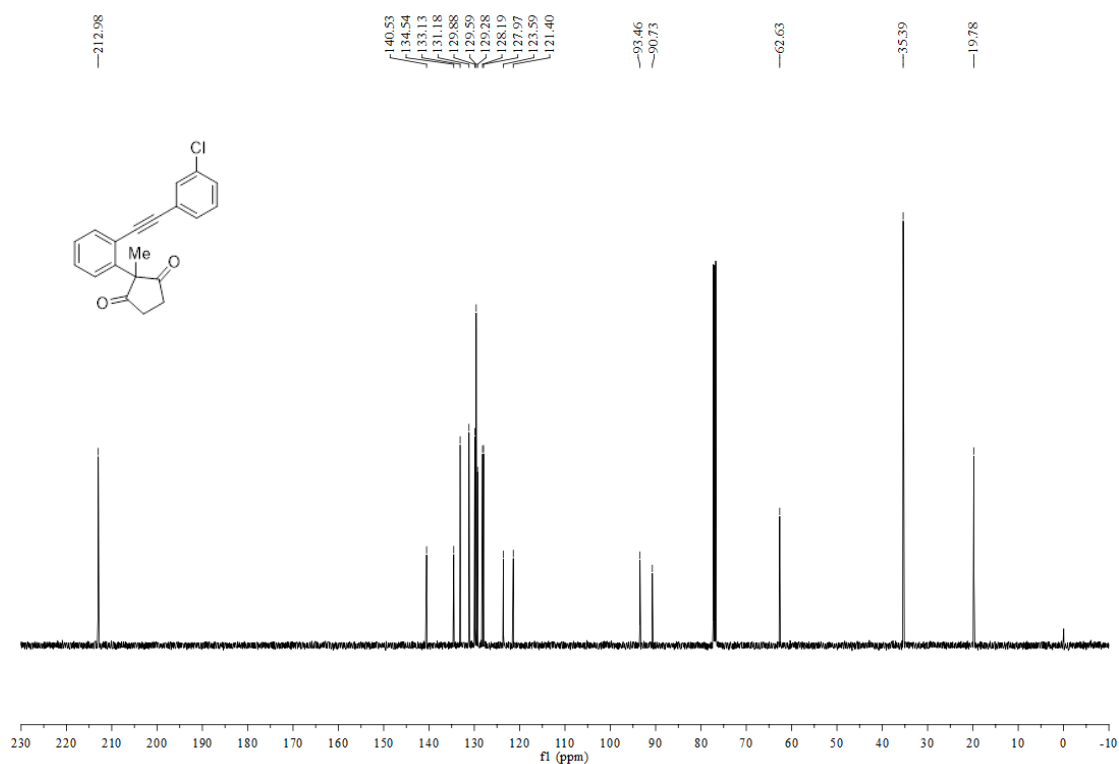

**2-(2-((3-Fluorophenyl)ethynyl)phenyl)-2-methylcyclopentane-1,3-dione (1i)**

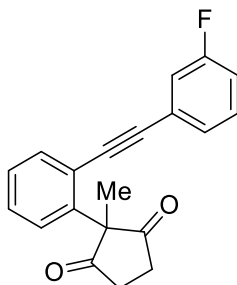

Purified by chromatography on silica gel, eluting with ethyl acetate/petroleum ether 1:5 (v/v); yellow solid, Mp = 149-150 °C; 68% yield (for the last step); <sup>1</sup>H NMR (500 MHz, CDCl<sub>3</sub>) δ 7.55 (d, *J* = 7.5 Hz, 1H), 7.47-7.43 (m, 2H), 7.38-7.32 (m, 2H), 7.25 (s, 1H), 7.18-7.16 (m, 1H), 7.13-7.09 (m, 1H), 3.09-2.97 (m, 2H), 2.75-2.63 (m, 2H), 1.63 (s, 3H). <sup>13</sup>C NMR (125 MHz, CDCl<sub>3</sub>) δ 213.0, 162.4 (d, *J* = 246.3 Hz), 140.5, 133.1, 130.3 (d, *J* = 8.8 Hz), 129.3, 128.2, 128.0, 127.4 (d, *J* = 2.5 Hz), 123.7 (d, *J* = 10.0 Hz), 121.5, 118.2 (d, *J* = 22.5 Hz), 116.7 (d, *J* = 21.3 Hz), 93.6 (d, *J* = 3.8 Hz), 90.5, 62.6, 35.4, 19.8. HRMS *m/z* (ESI<sup>+</sup>): Calculated for C<sub>20</sub>H<sub>15</sub>FO<sub>2</sub>Na<sup>+</sup> ([M+Na]<sup>+</sup>) 329.0948, found 329.0949.

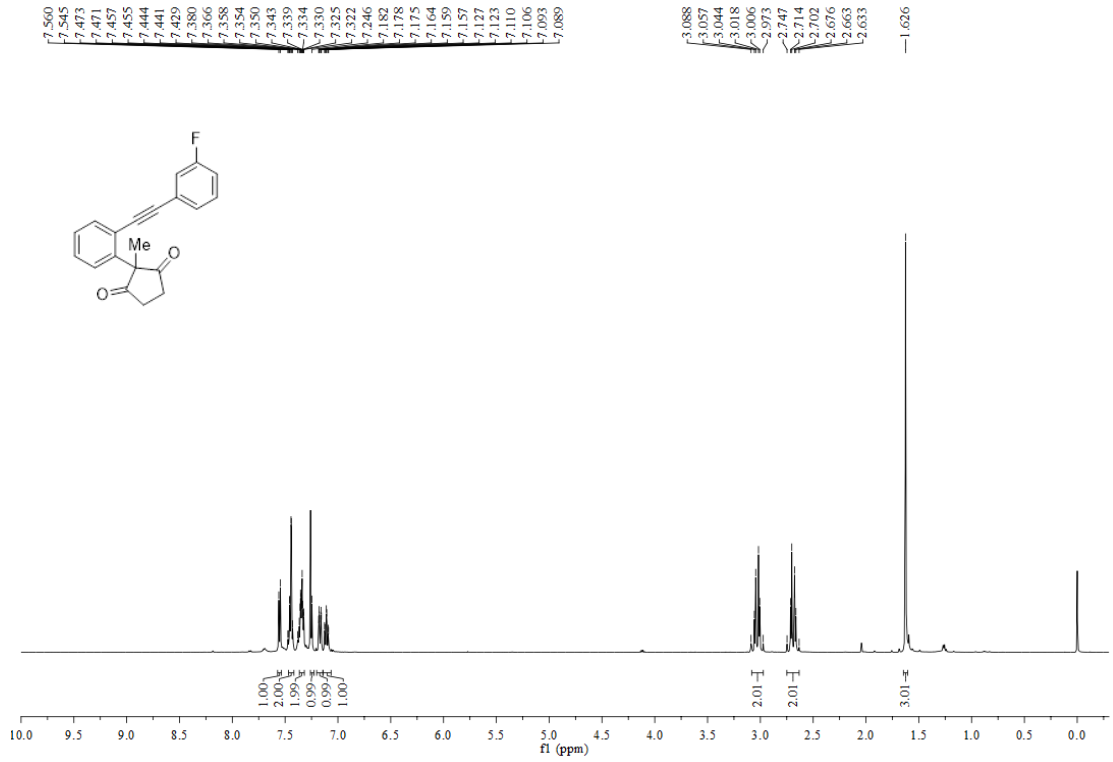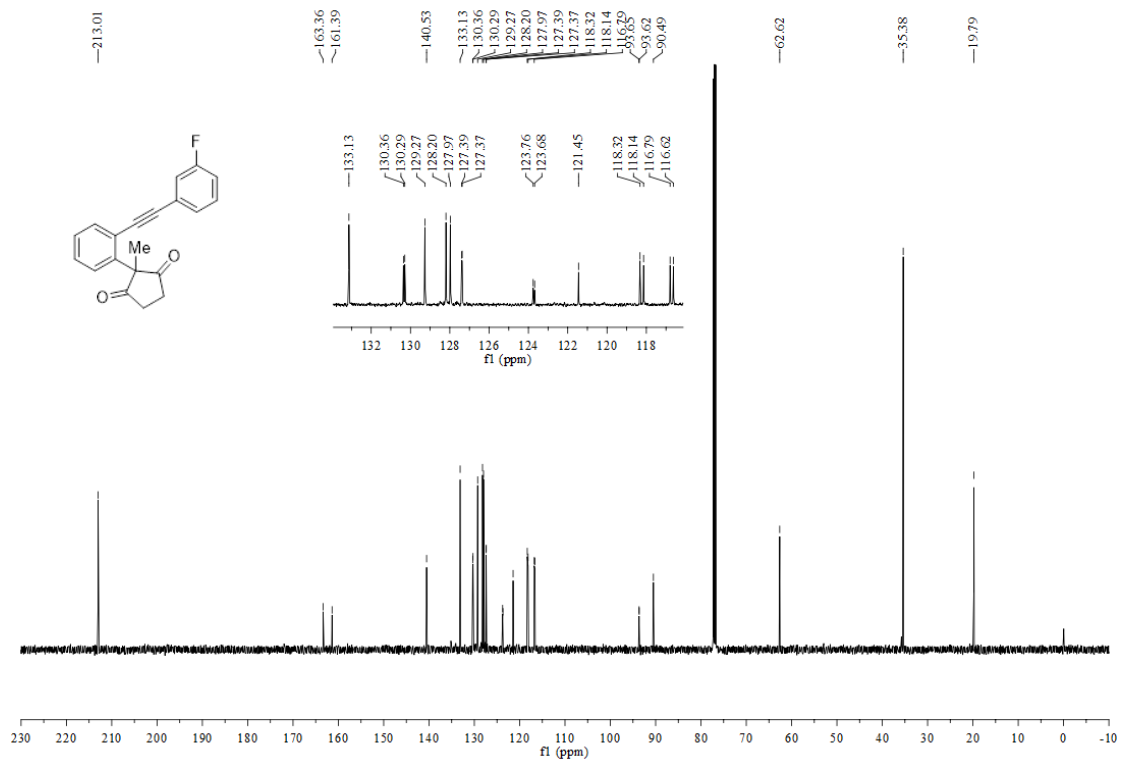



**2-(2-((3,5-Dimethoxyphenyl)ethynyl)phenyl)-2-methylcyclopentane-1,3-dione (1j)**

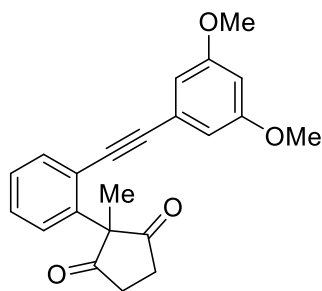

Purified by chromatography on silica gel, eluting with ethyl acetate/petroleum ether 1:5 (v/v); yellow solid, Mp = 150-151 °C; 84% yield (for the last step);  $^1\text{H}$  NMR (500 MHz,  $\text{CDCl}_3$ )  $\delta$  7.55 (d,  $J = 7.5$  Hz, 1H), 7.43 (d,  $J = 3.0$  Hz, 2H), 7.35-7.32 (dd,  $J = 7.5, 3.0$  Hz, 1H), 6.61 (d,  $J = 2.5$  Hz, 2H), 6.50 (t,  $J = 2.0$  Hz, 1H), 3.79 (s, 6H), 3.06-2.95 (m, 2H), 2.80-2.68 (m, 2H), 1.61 (s, 3H).  $^{13}\text{C}$  NMR (125 MHz,  $\text{CDCl}_3$ )  $\delta$  213.3, 160.7, 140.7, 133.0, 129.0, 128.1, 127.9, 123.2, 121.8, 109.2, 102.5, 95.1, 89.2, 62.5, 55.5, 35.5, 19.7. HRMS  $m/z$  (ESI $^+$ ): Calculated for  $\text{C}_{22}\text{H}_{20}\text{O}_4$  ( $[\text{M}+\text{H}]^+$ ) 349.1434, found 349.1437.

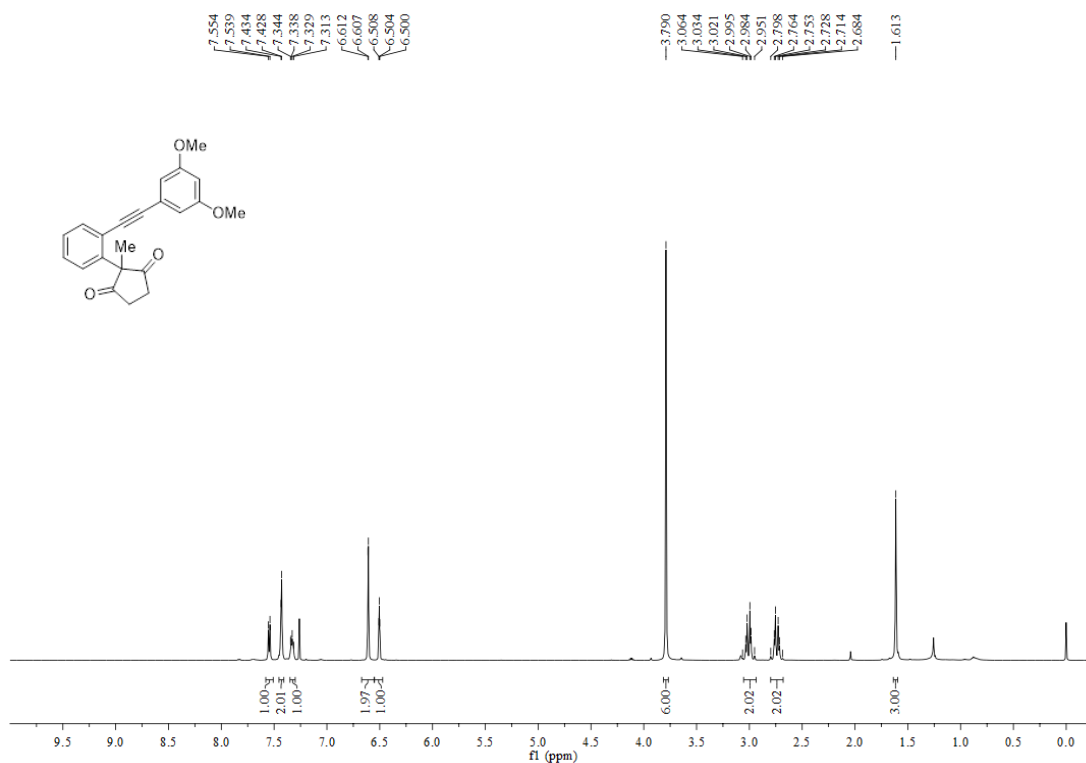

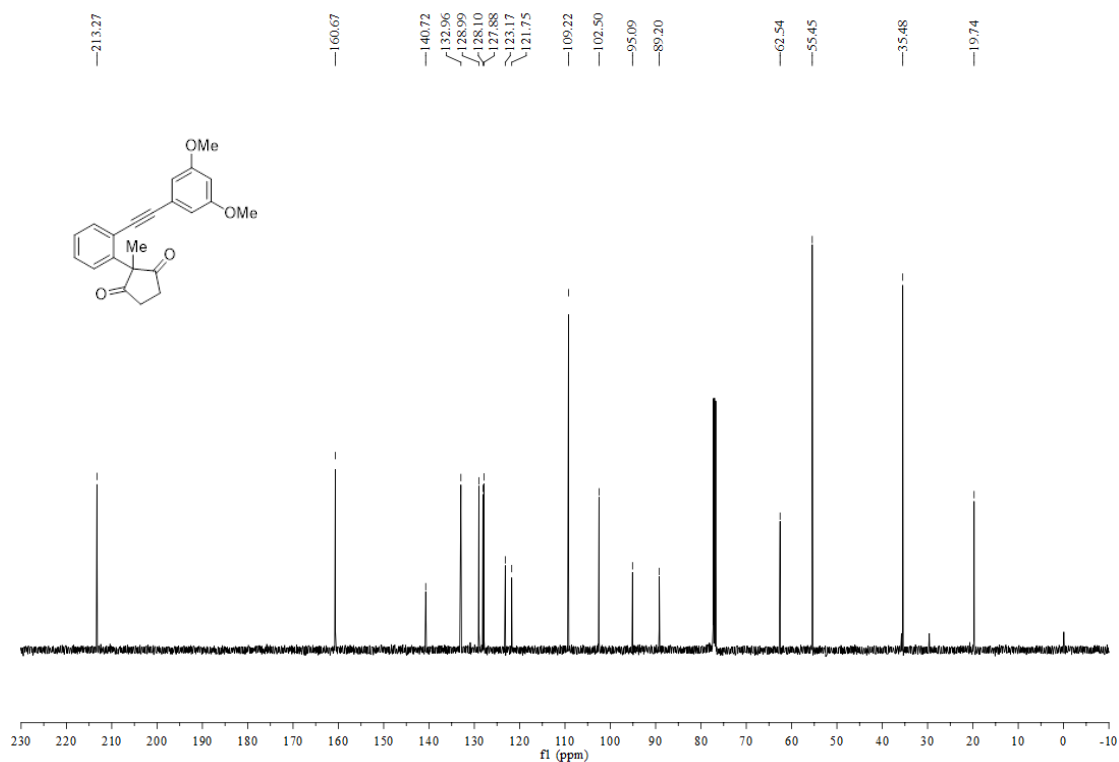

**2-Methyl-2-(2-(*o*-tolylethynyl)phenyl)cyclopentane-1,3-dione (1k)**

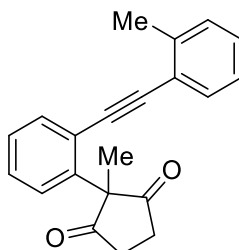

Purified by chromatography on silica gel, eluting with ethyl acetate/petroleum ether 1:5 (v/v); yellow solid, Mp = 163-164 °C; 65 % yield (for the last step);  $^1\text{H}$  NMR (600 MHz,  $\text{CDCl}_3$ )  $\delta$  7.55 (d,  $J = 7.2$  Hz, 1H), 7.43 (d,  $J = 3.6$  Hz, 2H), 7.40 (d,  $J = 7.8$  Hz, 1H), 7.36-7.31 (m, 1H), 7.31-7.27 (m, 1H), 7.25 (s, 1H), 7.18 (t,  $J = 7.2$  Hz, 1H), 3.02-2.92 (m, 2H), 2.69-2.59 (m, 2H), 2.43 (s, 3H), 1.61 (s, 3H).  $^{13}\text{C}$  NMR (150 MHz,  $\text{CDCl}_3$ )  $\delta$  213.4, 141.1, 140.7, 133.0, 131.5, 129.8, 129.3, 128.9, 128.1, 127.9, 125.8, 122.2, 121.6, 94.1, 93.2, 62.7, 35.3, 20.6, 19.8. HRMS  $m/z$  (ESI $^+$ ): Calculated for  $\text{C}_{21}\text{H}_{19}\text{O}_2^+$  ( $[\text{M}+\text{H}]^+$ ) 303.1380, found 303.1382.

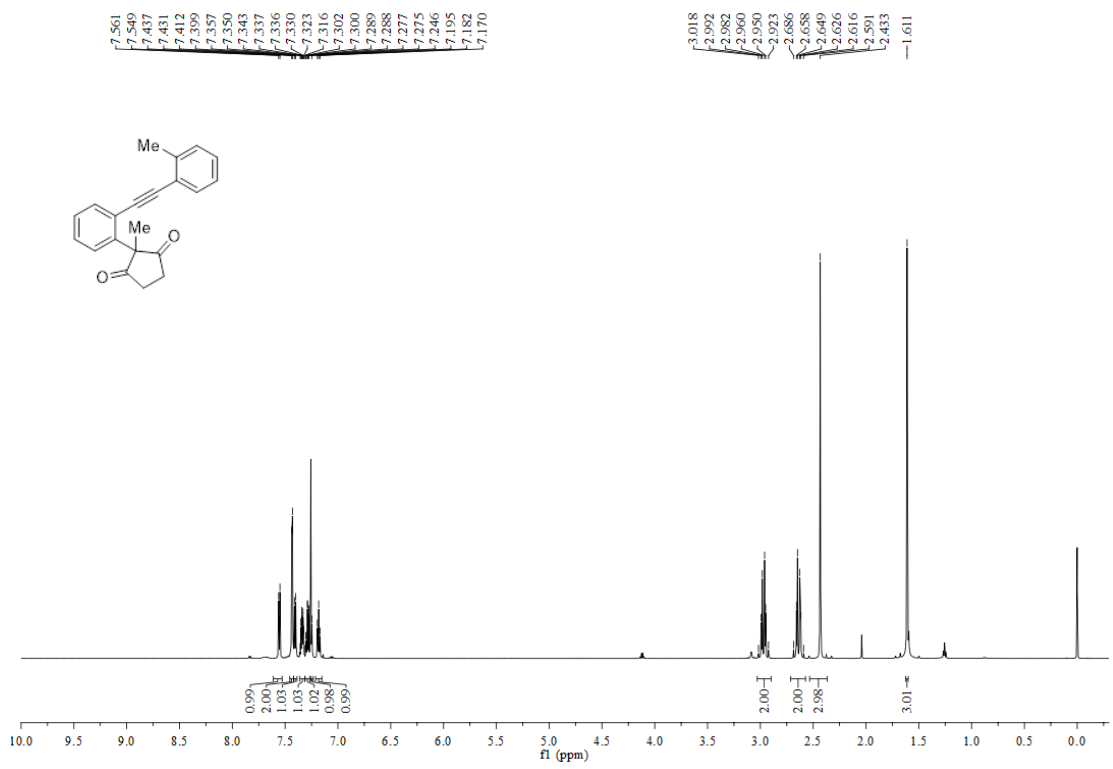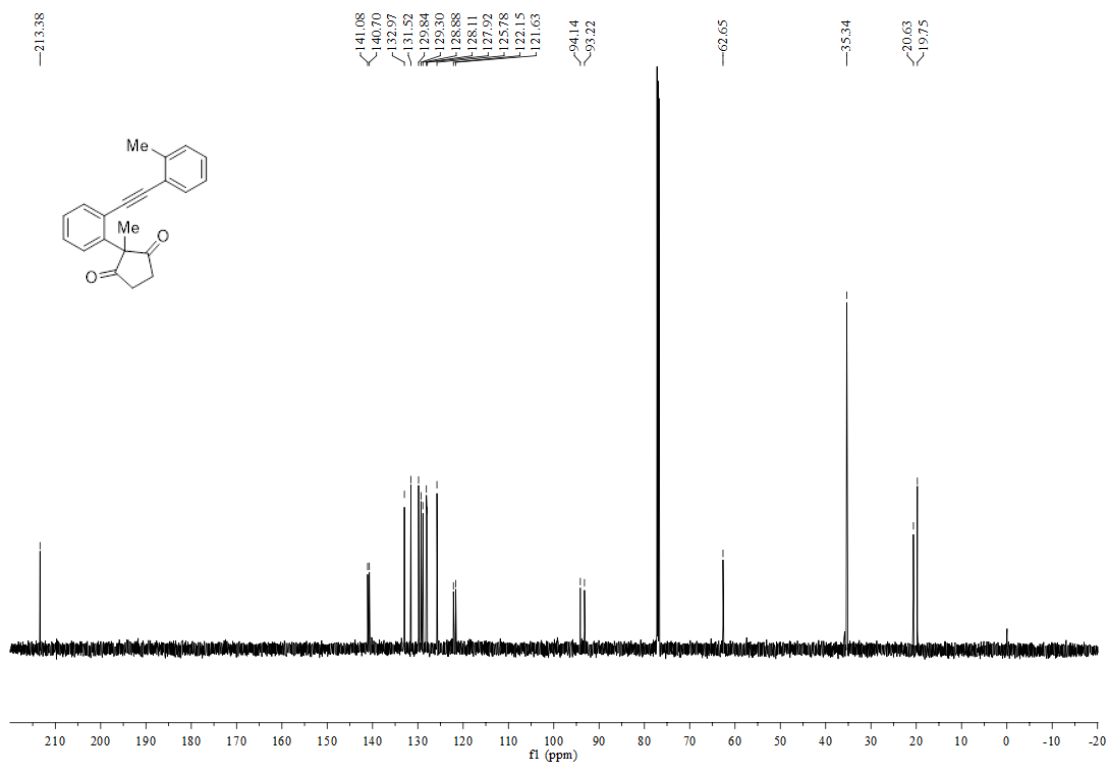

**2-(2-((2-Methoxyphenyl)ethynyl)phenyl)-2-methylcyclopentane-1,3-dione (11)**

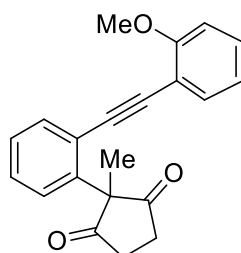

Purified by chromatography on silica gel, eluting with ethyl acetate/petroleum ether 1:5 (v/v); brown solid, Mp = 175-176 °C; 80% yield (for the last step); <sup>1</sup>H NMR (500 MHz, CDCl<sub>3</sub>) δ 7.57 (d, *J* = 7.5 Hz, 1H), 7.43-7.42 (m, 3H), 7.37-7.30 (m, 2H), 6.96-6.90 (m, 2H), 3.87 (s, 3H), 3.02-2.89 (m, 2H), 2.86-2.78 (m, 2H), 1.61 (s, 3H). <sup>13</sup>C NMR (125 MHz, CDCl<sub>3</sub>) δ 213.7, 160.1, 140.3, 133.7, 133.4, 130.7, 128.7, 128.0, 127.8, 122.4, 120.6, 111.2, 110.9, 93.0, 92.1, 62.5, 55.6, 35.3, 19.9. HRMS *m/z* (ESI<sup>+</sup>): Calculated for C<sub>21</sub>H<sub>19</sub>O<sub>3</sub><sup>+</sup> ([M+H]<sup>+</sup>) 319.1329, found 319.1332.

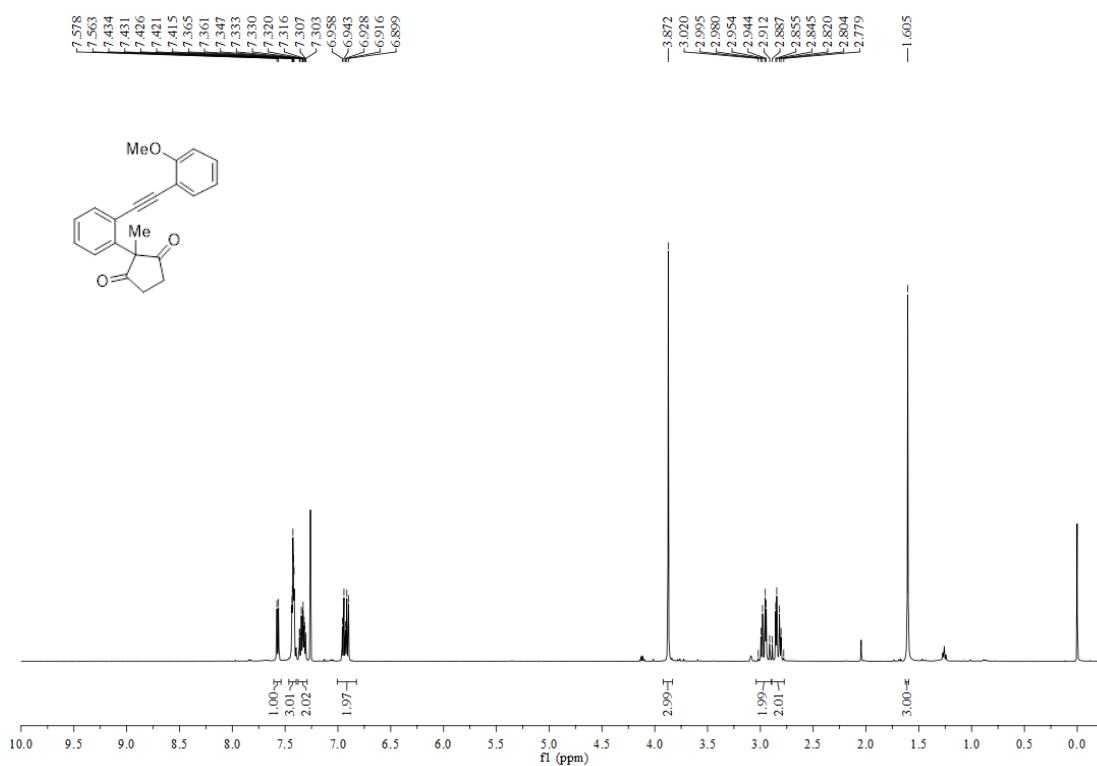

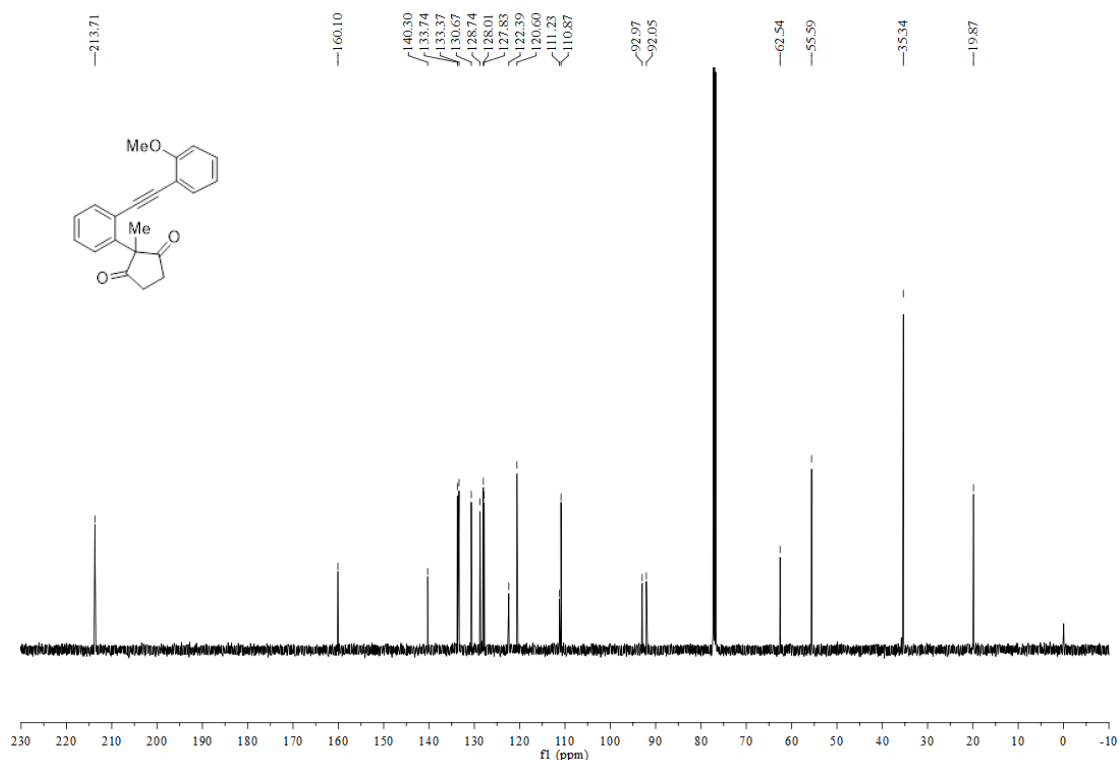

**2-Methyl-2-(2-(naphthalen-2-ylethynyl)phenyl)cyclopentane-1,3-dione (1m)**

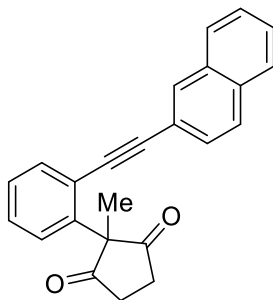

Purified by chromatography on silica gel, eluting with ethyl acetate/petroleum ether 1:5 (v/v); yellow solid, Mp = 154-155 °C; 75% yield (for the last step); <sup>1</sup>H NMR (500 MHz, CDCl<sub>3</sub>) δ 8.00 (s, 1H), 7.83 (t, *J* = 7.5 Hz, 3H), 7.59 (d, *J* = 7.5 Hz, 1H), 7.54-7.49 (m, 3H), 7.45 (d, *J* = 4.0 Hz, 2H), 7.36-7.33 (m, 1H), 3.03-2.91 (m, 2H), 2.76-2.64 (m, 2H), 1.62 (s, 3H). <sup>13</sup>C NMR (125 MHz, CDCl<sub>3</sub>) δ 213.3, 140.8, 133.2, 133.0, 132.8, 131.6, 129.0, 128.4, 128.1, 127.94, 127.91, 127.84, 127.79, 127.3, 126.9, 121.9, 119.1, 95.5, 90.0, 62.6, 35.4, 19.8. HRMS *m/z* (ESI<sup>+</sup>): Calculated for C<sub>24</sub>H<sub>19</sub>O<sub>2</sub><sup>+</sup> ([M+H]<sup>+</sup>) 339.1380, found 339.1382.

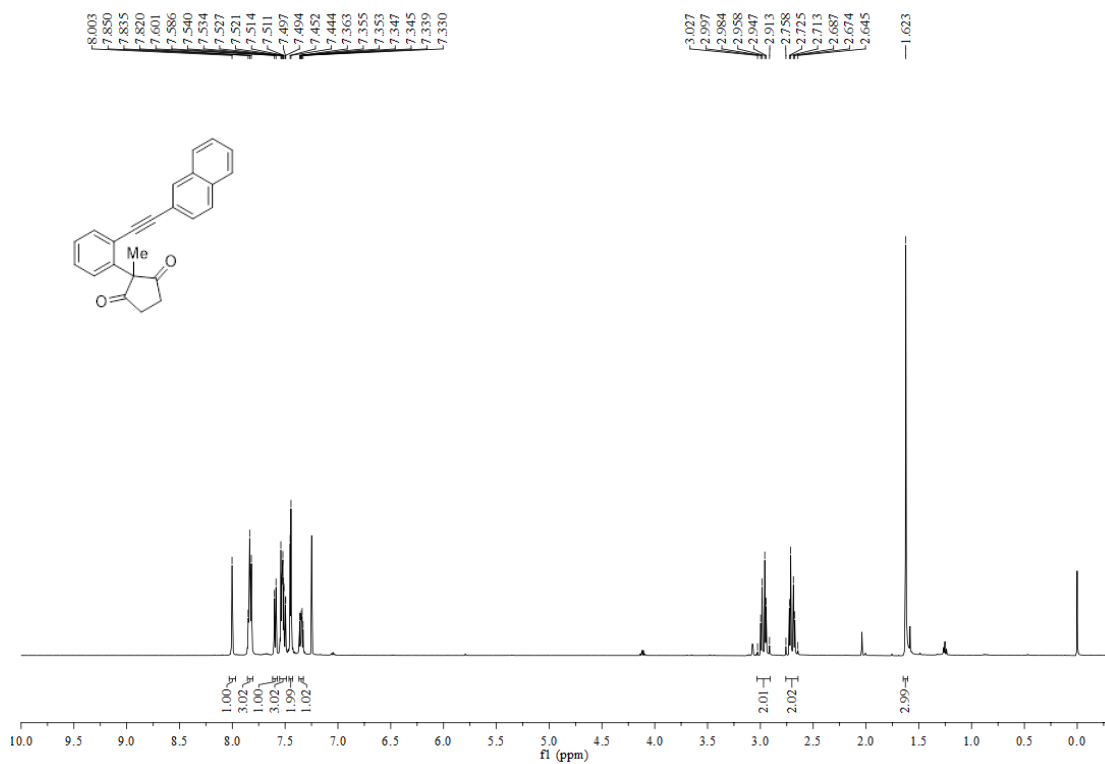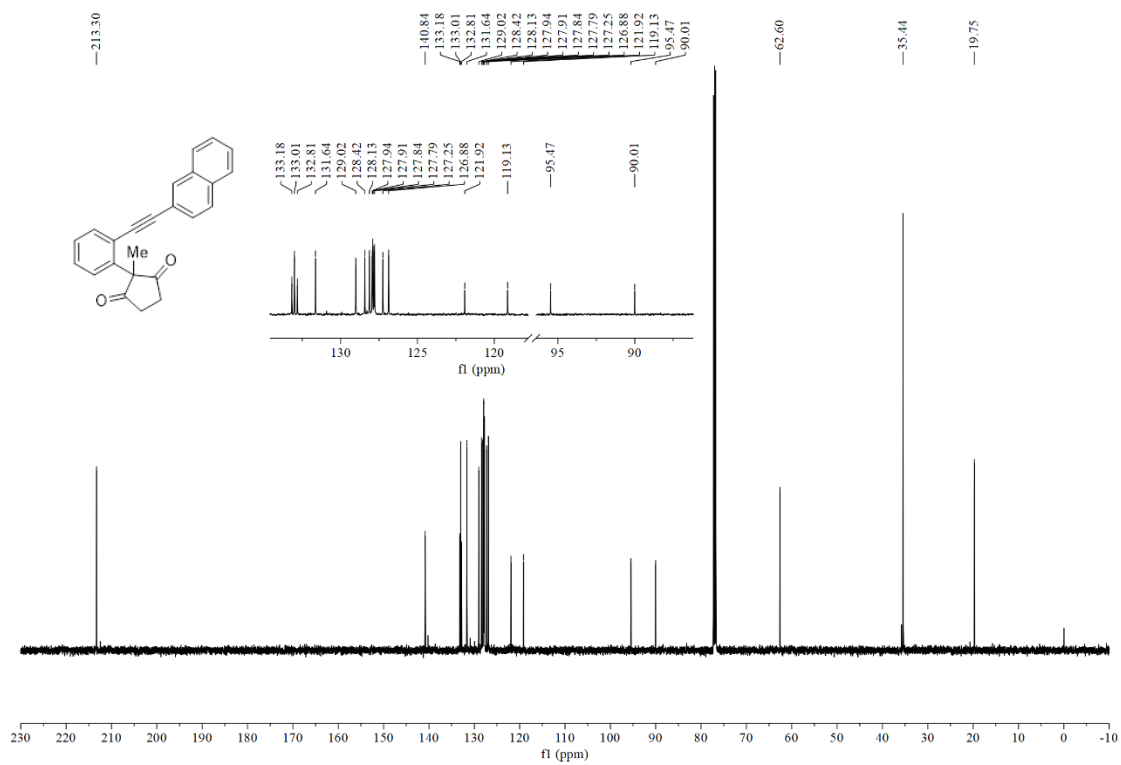

**2-Methyl-2-(2-(thiophen-2-ylethynyl)phenyl)cyclopentane-1,3-dione (1n)**

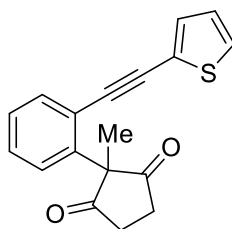

Purified by chromatography on silica gel, eluting with ethyl acetate/petroleum ether 1:5 (v/v); brown solid, Mp = 149-150 °C; 70% yield (for the last step); <sup>1</sup>H NMR (500 MHz, CDCl<sub>3</sub>) δ 7.55 (d, *J* = 7.0 Hz, 1H), 7.46-7.41 (m, 2H), 7.35-7.31 (m, 2H), 7.27 (d, *J* = 3.5 Hz, 1H), 7.04-7.20 (m, 1H), 3.10-2.98 (m, 2H), 2.88-2.77 (m, 2H), 1.61 (s, 3H). <sup>13</sup>C NMR (125 MHz, CDCl<sub>3</sub>) δ 213.2, 140.9, 133.3, 132.8, 129.3, 128.4, 128.1, 127.9, 127.4, 121.6, 121.5, 93.1, 88.4, 62.5, 35.5, 19.7. HRMS *m/z* (ESI<sup>+</sup>): Calculated for C<sub>18</sub>H<sub>15</sub>O<sub>2</sub>S<sup>+</sup> ([M+H]<sup>+</sup>) 295.0787, found 295.0787.

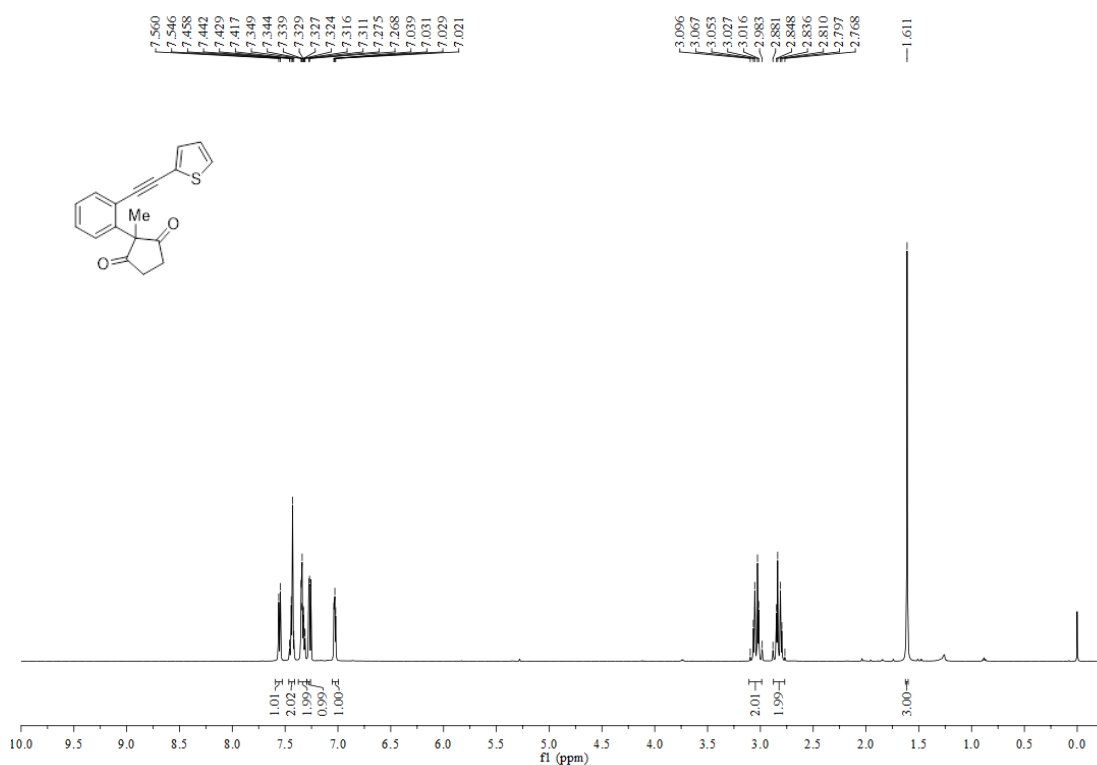

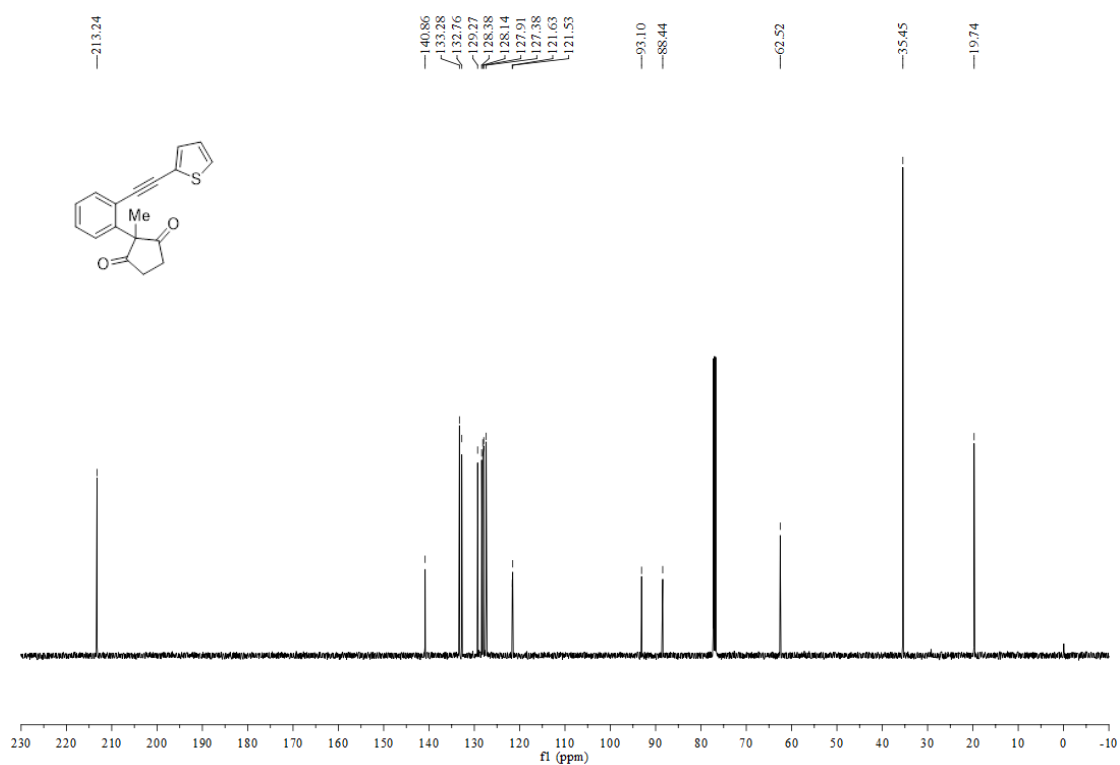

**2-Methyl-2-(2-(prop-1-yn-1-yl)phenyl)cyclopentane-1,3-dione (1o)**

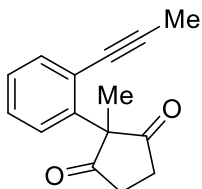

Purified by chromatography on silica gel, eluting with ethyl acetate/petroleum ether 1:5 (v/v); brown solid, Mp = 131-132 °C; 80% yield (for the last step); <sup>1</sup>H NMR (500 MHz, CDCl<sub>3</sub>) δ 7.40 (d, *J* = 7.5 Hz, 1H), 7.36-7.34 (m, 2H), 7.27-7.23 (m, 1H), 3.14-3.02 (m, 2H), 2.87-2.76 (m, 2H), 1.98 (s, 3H), 1.55 (s, 3H). <sup>13</sup>C NMR (125 MHz, CDCl<sub>3</sub>) δ 213.4, 140.2, 132.7, 128.1, 127.8, 127.7, 122.5, 92.2, 80.6, 62.2, 35.1, 19.4, 4.2. HRMS *m/z* (ESI<sup>+</sup>): Calculated for C<sub>15</sub>H<sub>14</sub>O<sub>2</sub>Na<sup>+</sup> ([M+Na]<sup>+</sup>) 249.0886, found 249.0888.



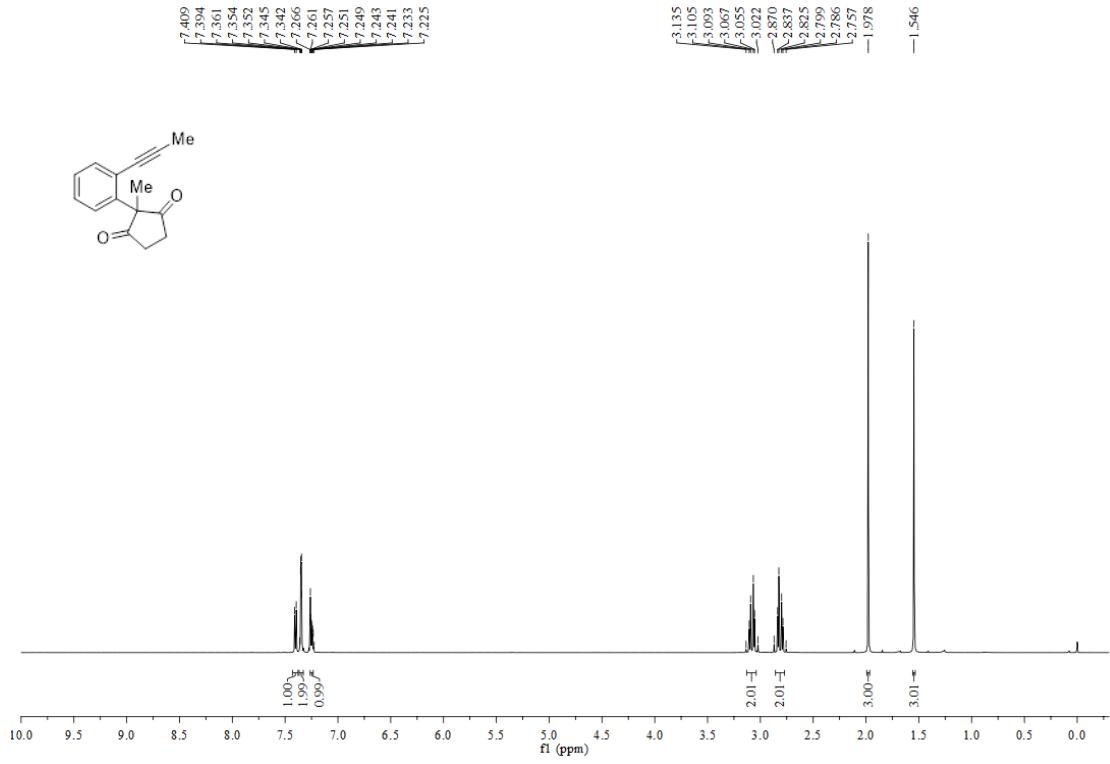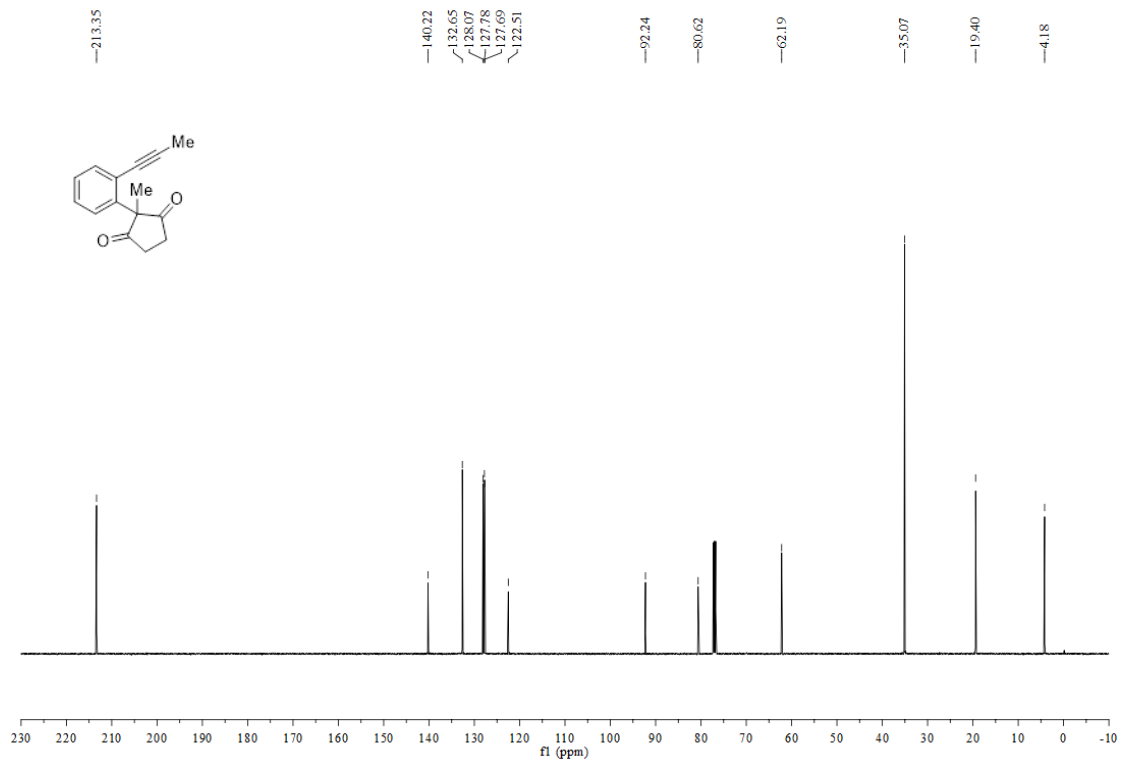

**2-Methyl-2-(2-(3-phenylprop-1-yn-1-yl)phenyl)cyclopentane-1,3-dione (1p)**

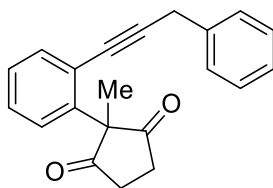

Purified by chromatography on silica gel, eluting with ethyl acetate/petroleum ether 1:5 (v/v); white solid, Mp = 119-120 °C; 68% yield (for the last step); <sup>1</sup>H NMR (600 MHz, CDCl<sub>3</sub>) δ 7.49 (d, *J* = 7.2 Hz, 1H), 7.41-7.37 (m, 2H), 7.37-7.32 (m, 4H), 7.31-7.26 (m, 2H), 3.78 (s, 2H), 3.00-2.89 (m, 2H), 2.63-2.52 (m, 2H), 1.56 (s, 3H). <sup>13</sup>C NMR (150 MHz, CDCl<sub>3</sub>) δ 213.5, 140.0, 135.3, 133.5, 128.8, 128.5, 128.02, 127.99, 127.9, 127.1, 122.4, 93.8, 83.0, 62.6, 35.2, 25.9, 19.8. HRMS *m/z* (ESI<sup>+</sup>): Calculated for C<sub>21</sub>H<sub>18</sub>NaO<sub>2</sub><sup>+</sup> ([M+Na]<sup>+</sup>) 325.1199, found 325.1197.

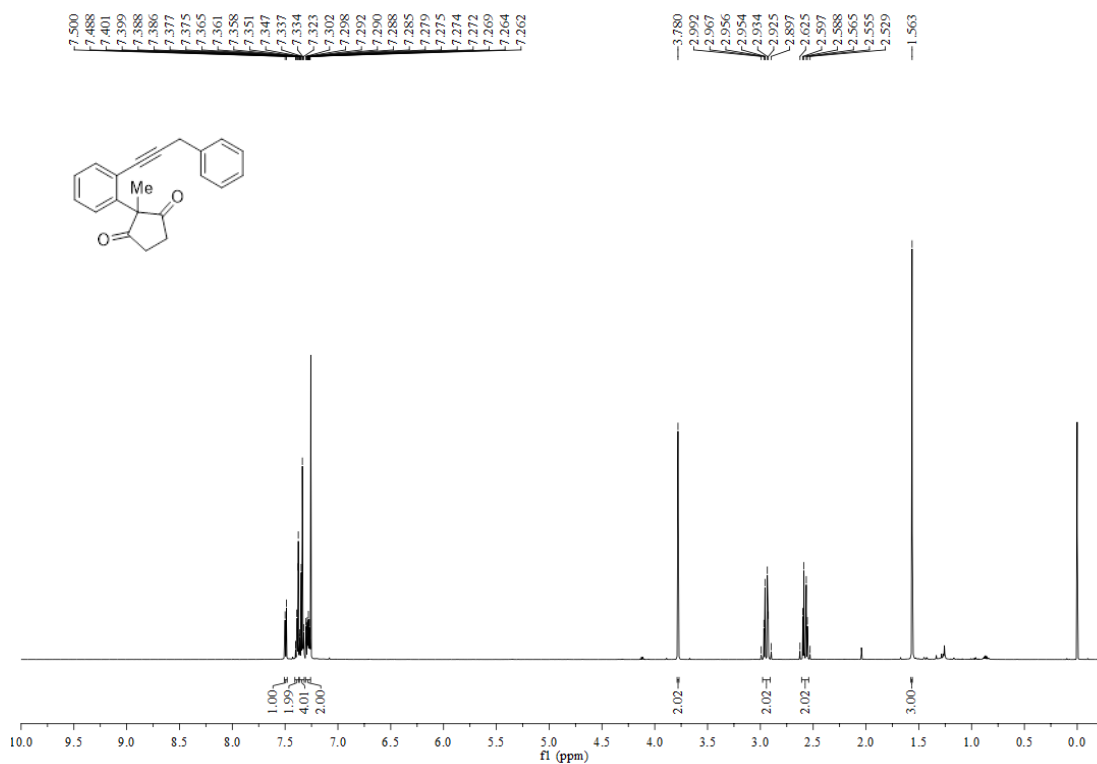

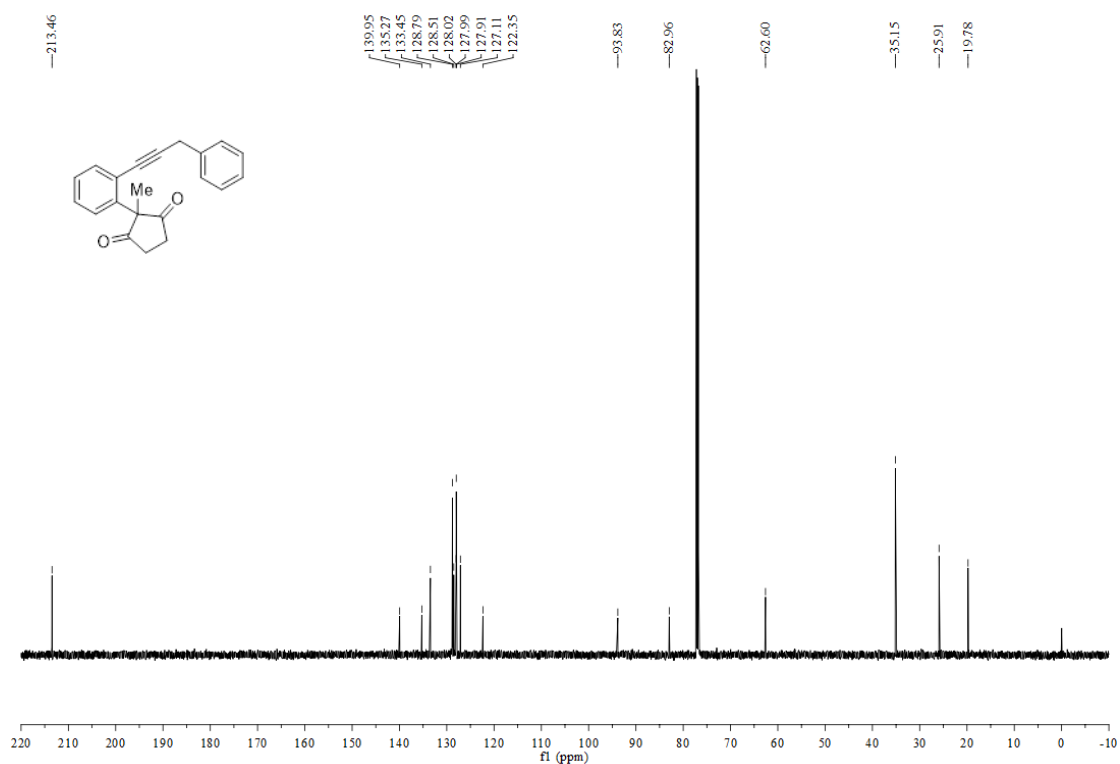

**2-Methyl-2-(2-(3-phenoxyprop-1-yn-1-yl)phenyl)cyclopentane-1,3-dione (1q)**

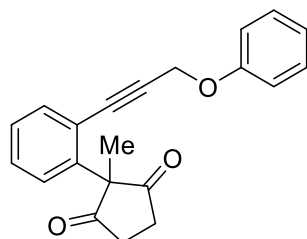

Purified by chromatography on silica gel, eluting with ethyl acetate/petroleum ether 1:5 (v/v); yellow solid, Mp = 125-126 °C; 74% yield (for the last step); <sup>1</sup>H NMR (500 MHz, CDCl<sub>3</sub>) δ 7.46 (d, *J* = 7.5 Hz, 1H), 7.43-7.38 (m, 2H), 7.33-7.27 (m, 3H), 7.01 (t, *J* = 7.5 Hz, 1H), 6.94 (d, *J* = 8.0 Hz, 2H), 4.83 (s, 2H), 3.08-2.95 (m, 4H), 1.57 (s, 3H). <sup>13</sup>C NMR (125 MHz, CDCl<sub>3</sub>) δ 213.5, 157.6, 139.9, 133.3, 129.6, 129.2, 128.2, 127.9, 121.8, 121.1, 114.7, 89.9, 86.6, 62.8, 56.7, 35.3, 19.8. HRMS *m/z* (ESI<sup>+</sup>): Calculated for C<sub>21</sub>H<sub>18</sub>NaO<sub>3</sub><sup>+</sup> ([M+Na]<sup>+</sup>) 341.1148, found 341.1146.

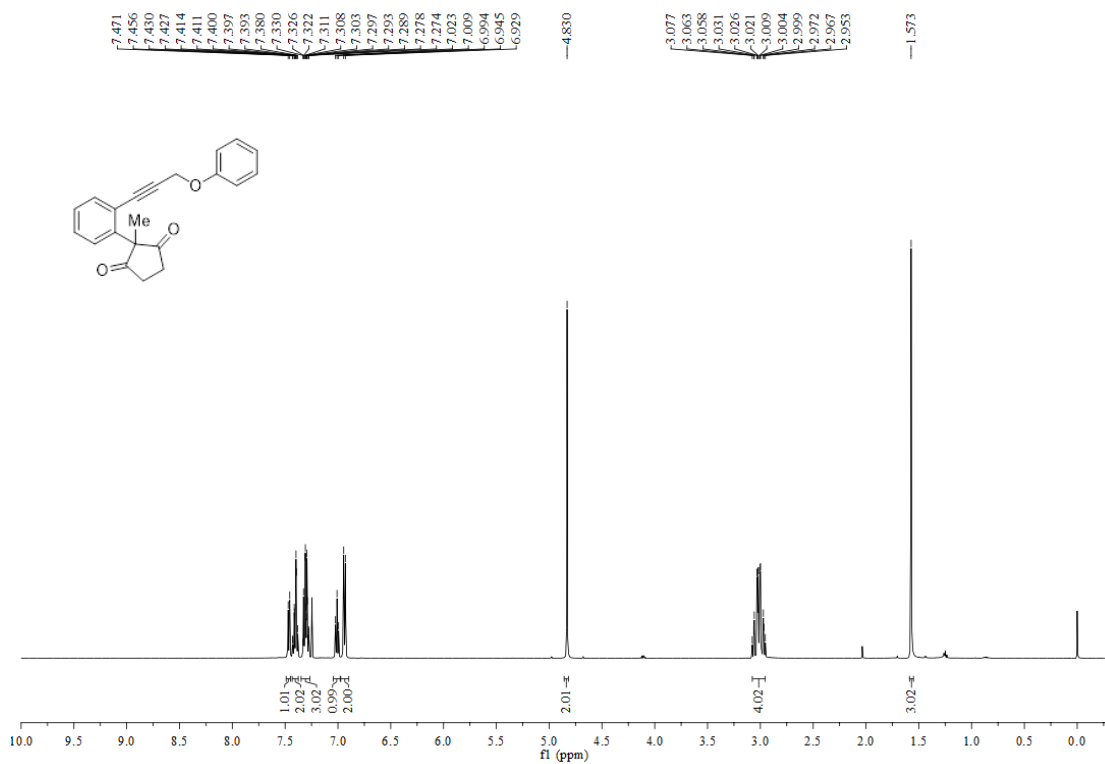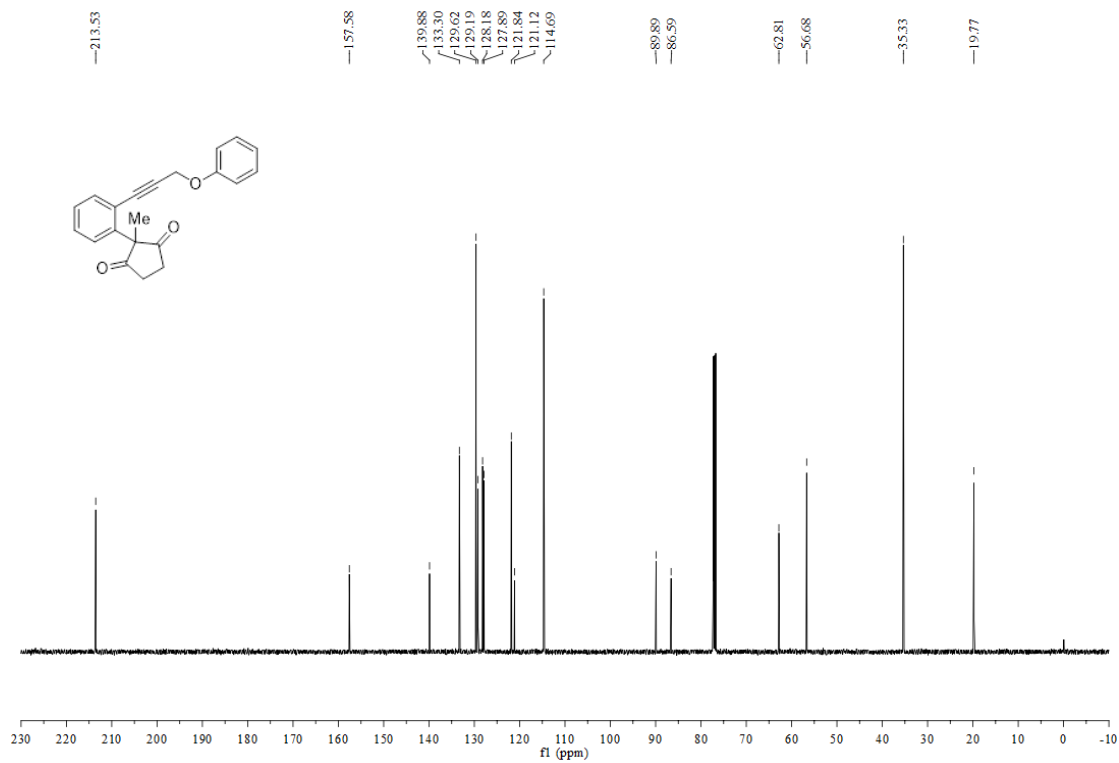

**2-(2-(3,3-Diethoxyprop-1-yn-1-yl)phenyl)-2-methylcyclopentane-1,3-dione (1r)**

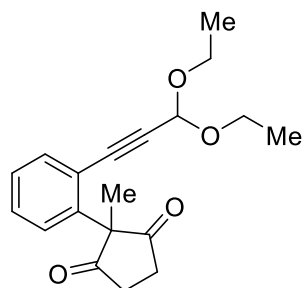

Purified by chromatography on silica gel, eluting with ethyl acetate/petroleum ether 1:5 (v/v); brown solid, Mp = 79-80 °C; 63% yield (for the last step);  $^1\text{H}$  NMR (600 MHz, DMSO)  $\delta$  7.51-7.48 (m, 3H), 7.39-7.36 (m, 1H), 5.55 (s, 1H), 3.65-3.59 (m, 2H), 3.57-3.52 (m, 2H), 3.24-3.15 (m, 2H), 2.97-2.90 (m, 2H), 1.54 (s, 3H), 1.16 (t,  $J = 7.2$  Hz, 6H).  $^{13}\text{C}$  NMR (150 MHz, DMSO)  $\delta$  214.8, 142.0, 133.7, 130.3, 129.7, 128.7, 121.3, 91.9, 91.5, 84.6, 63.8, 61.5, 36.1, 20.1, 15.8. HRMS  $m/z$  (ESI $^+$ ): Calculated for  $\text{C}_{19}\text{H}_{22}\text{NaO}_4^+$  ( $[\text{M}+\text{Na}]^+$ ) 337.1410, found 337.1408.

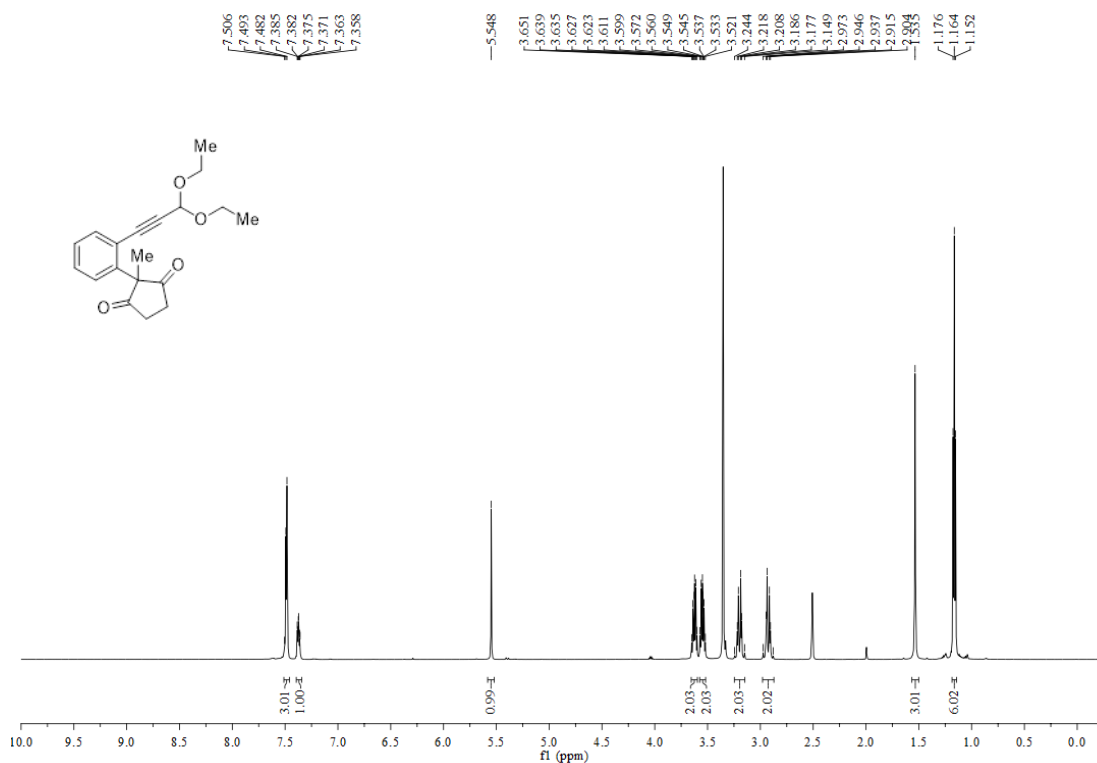

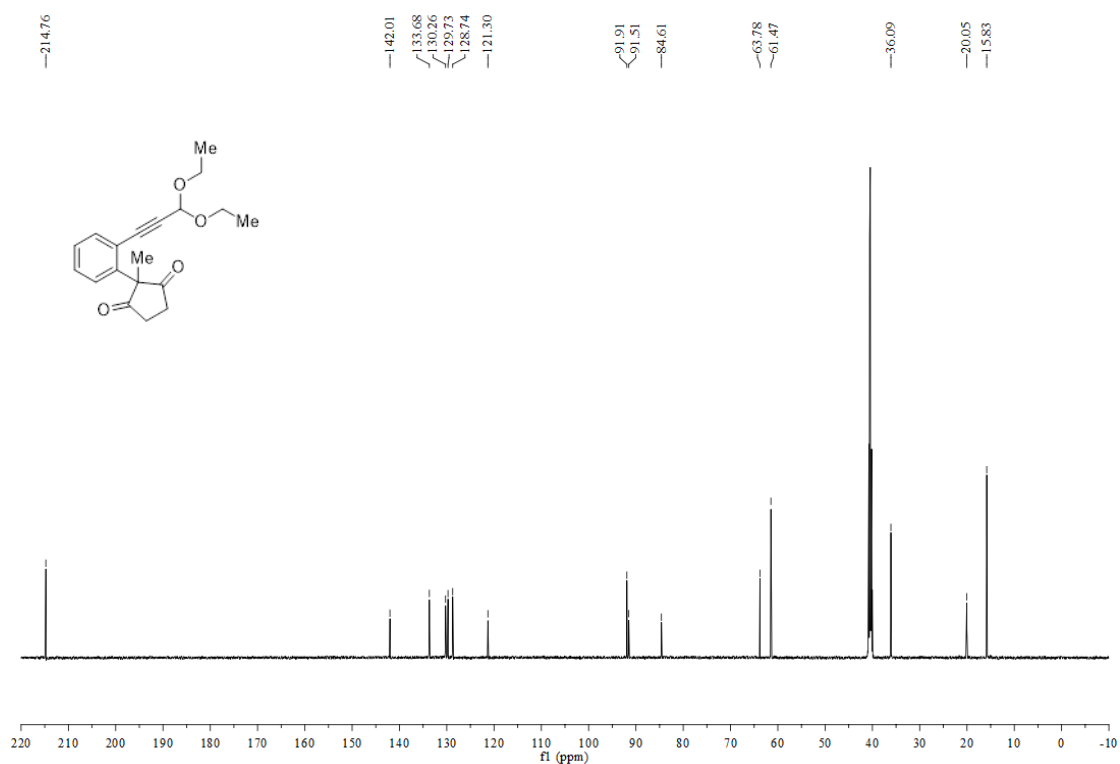

**2-(2-(4-(Benzyloxy)but-1-yn-1-yl)phenyl)-2-methylcyclopentane-1,3-dione (1s)**

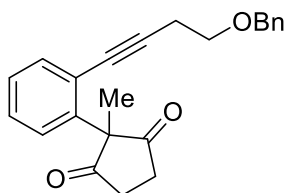

Purified by chromatography on silica gel, eluting with ethyl acetate/petroleum ether 1:5 (v/v); yellow oil; 70% yield (for the last step); <sup>1</sup>H NMR (500 MHz, CDCl<sub>3</sub>) δ 7.43 (d, *J* = 7.5 Hz, 1H), 7.37 (d, *J* = 2.5 Hz, 1H), 7.37-7.34 (m, 4H), 7.31-7.24 (m, 3H), 4.55 (s, 2H), 3.62 (t, *J* = 6.5 Hz, 2H), 3.05-2.89 (m, 4H), 2.65 (t, *J* = 6.5 Hz, 2H), 1.57 (s, 3H). <sup>13</sup>C NMR (125 MHz, CDCl<sub>3</sub>) δ 213.6, 140.1, 137.8, 133.4, 128.5, 128.0, 127.87, 127.85, 127.8, 122.4, 93.7, 82.1, 73.3, 68.0, 62.5, 35.4, 21.3, 19.8. HRMS *m/z* (ESI<sup>+</sup>): Calculated for C<sub>23</sub>H<sub>22</sub>NaO<sub>3</sub><sup>+</sup> ([M+Na]<sup>+</sup>) 369.1461, found 369.1459.

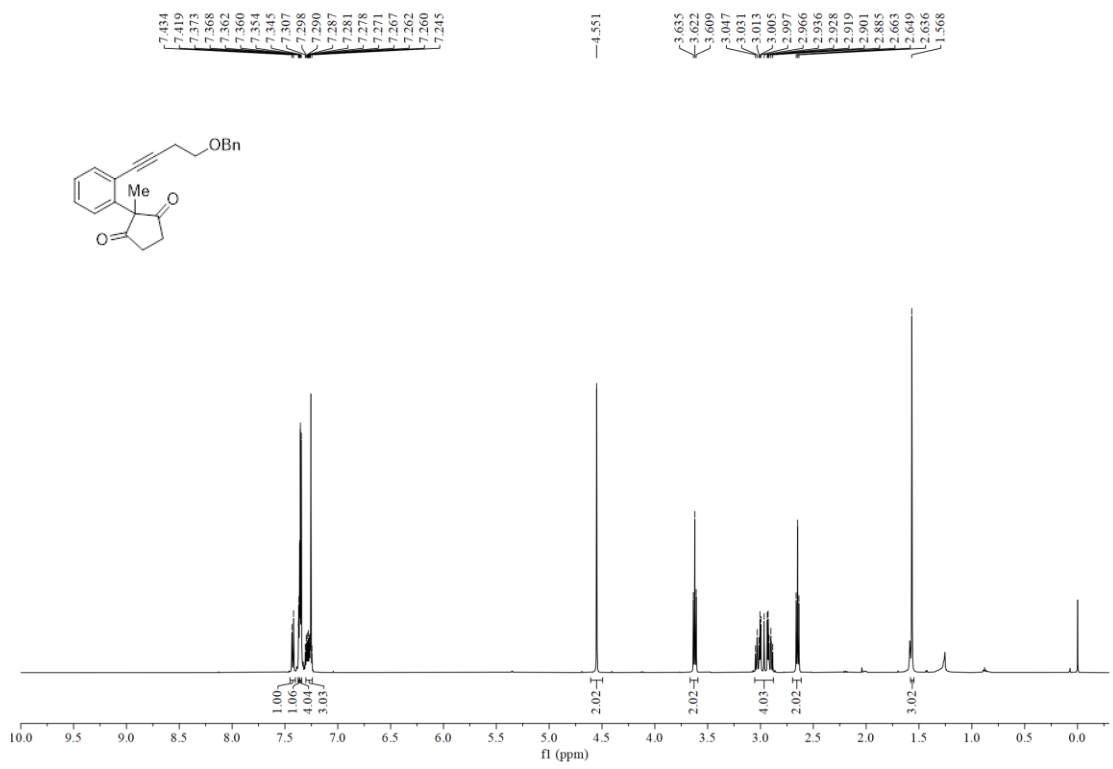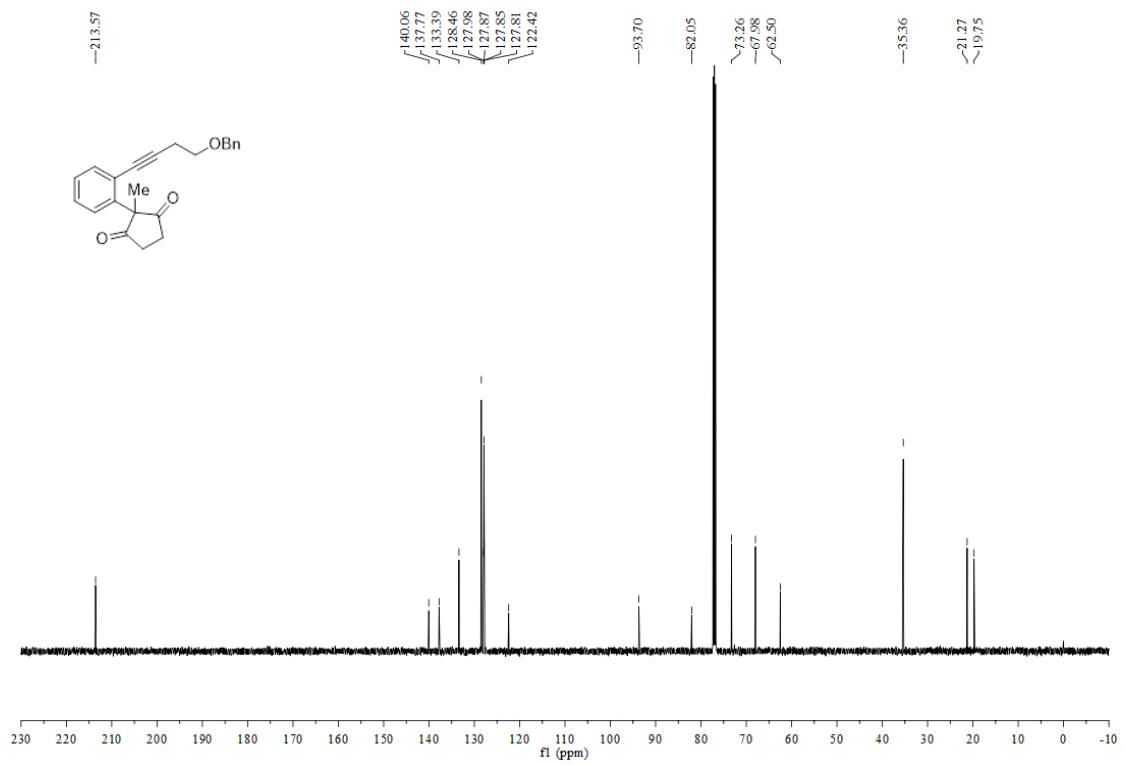

**2-(2-(4-((*tert*-Butyldimethylsilyl)oxy)but-1-yn-1-yl)phenyl)-2-methylcyclopentane-1,3-dione (1t)**

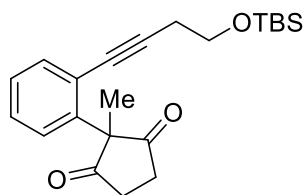

Purified by chromatography on silica gel, eluting with ethyl acetate/petroleum ether 1:5 (v/v); white solid, Mp = 100-101 °C; 88% yield (for the last step); <sup>1</sup>H NMR (400 MHz, CDCl<sub>3</sub>) δ 7.42 (d, *J* = 7.6 Hz, 1H), 7.39-7.34 (m, 2H), 7.29-7.23 (m, 1H), 3.77 (t, *J* = 6.8 Hz, 2H), 3.13-3.06 (m, 2H), 2.97-2.87 (m, 2H), 2.55 (t, *J* = 6.8 Hz, 2H), 1.57 (s, 3H), 0.90 (s, 9H), 0.08 (s, 6H). <sup>13</sup>C NMR (100 MHz, CDCl<sub>3</sub>) δ 213.2, 140.2, 133.2, 128.4, 127.9, 127.8, 122.5, 93.8, 82.3, 62.3, 61.6, 35.4, 25.9, 24.1, 19.7, 18.3, -5.4. HRMS *m/z* (ESI<sup>+</sup>): Calculated for C<sub>22</sub>H<sub>30</sub>NaO<sub>3</sub>Si<sup>+</sup> ([M+Na]<sup>+</sup>) 393.1856, found 393.1854.

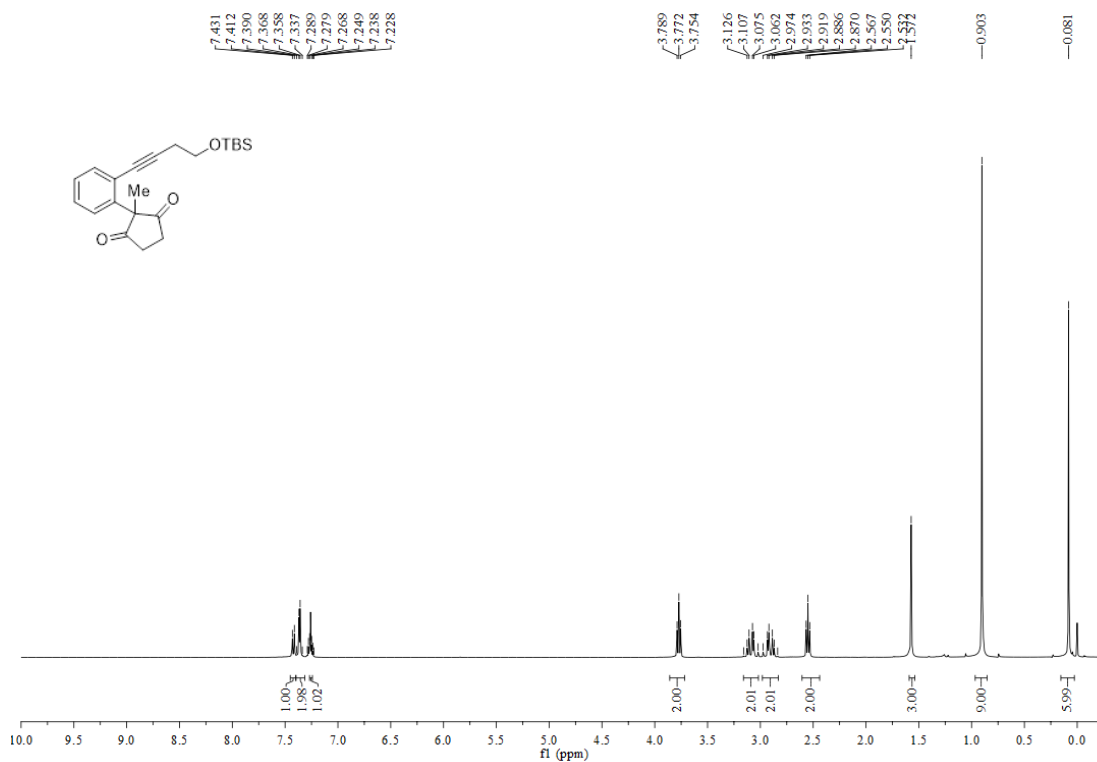



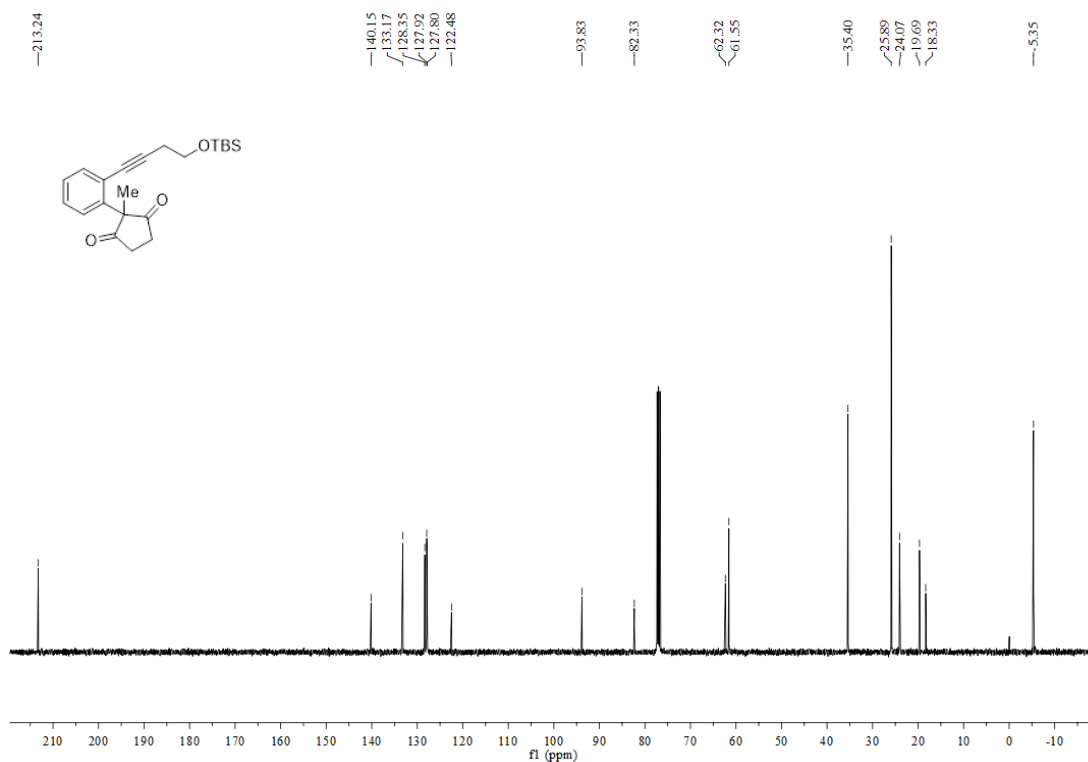

**2-(2-(5-Chloropent-1-yn-1-yl)phenyl)-2-methylcyclopentane-1,3-dione (1u)**

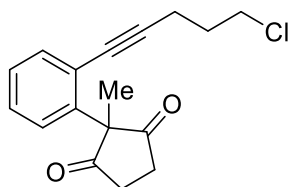

Purified by chromatography on silica gel, eluting with ethyl acetate/petroleum ether 1:5 (v/v); yellow oil; 79% yield (for the last step); <sup>1</sup>H NMR (500 MHz, CDCl<sub>3</sub>) δ 7.42 (d, *J* = 7.0 Hz, 1H), 7.37-7.36 (m, 2H), 7.28-7.25 (m, 1H), 3.63 (t, *J* = 6.0 Hz, 2H), 3.16-3.04 (m, 2H), 2.91-2.80 (m, 2H), 2.53 (t, *J* = 6.5 Hz, 2H), 2.04-1.97 (m, 2H), 1.57 (s, 3H). <sup>13</sup>C NMR (125 MHz, CDCl<sub>3</sub>) δ 213.1, 140.0, 133.1, 128.4, 127.9, 127.7, 122.2, 94.5, 82.2, 62.4, 43.4, 35.2, 31.0, 19.6, 16.7. HRMS *m/z* (ESI<sup>+</sup>): Calculated for C<sub>17</sub>H<sub>17</sub>ClNaO<sub>2</sub><sup>+</sup> ([M+Na]<sup>+</sup>) 311.0809, found 311.0808.

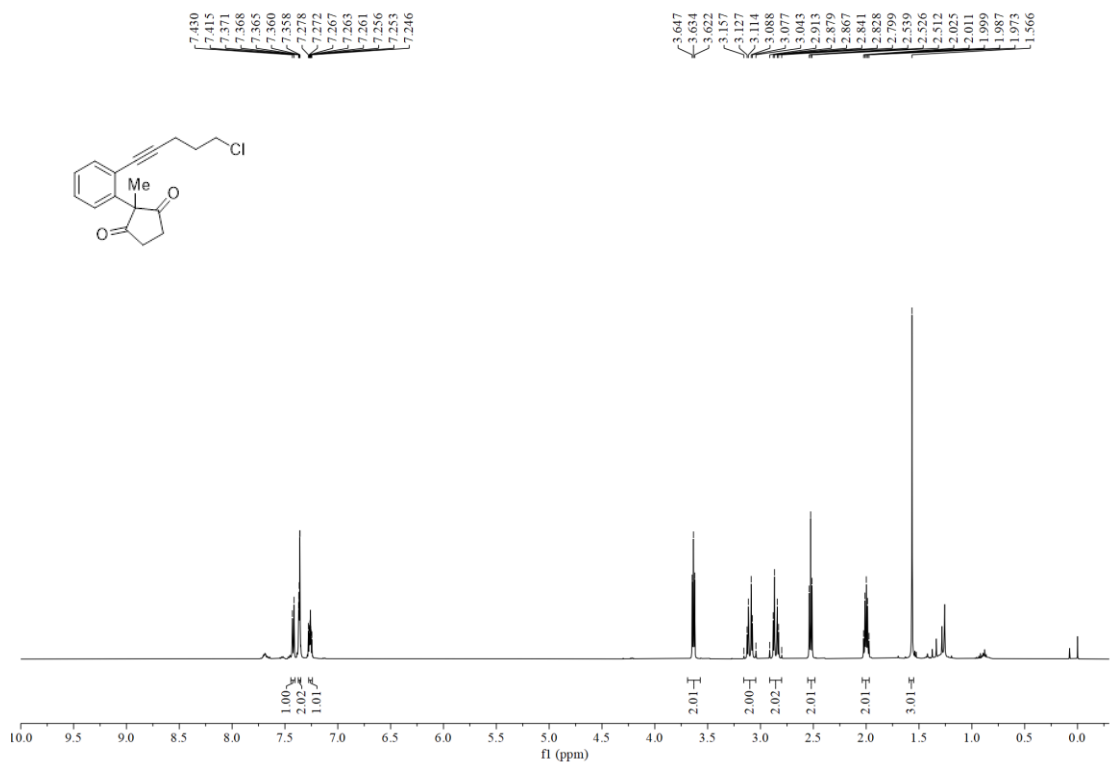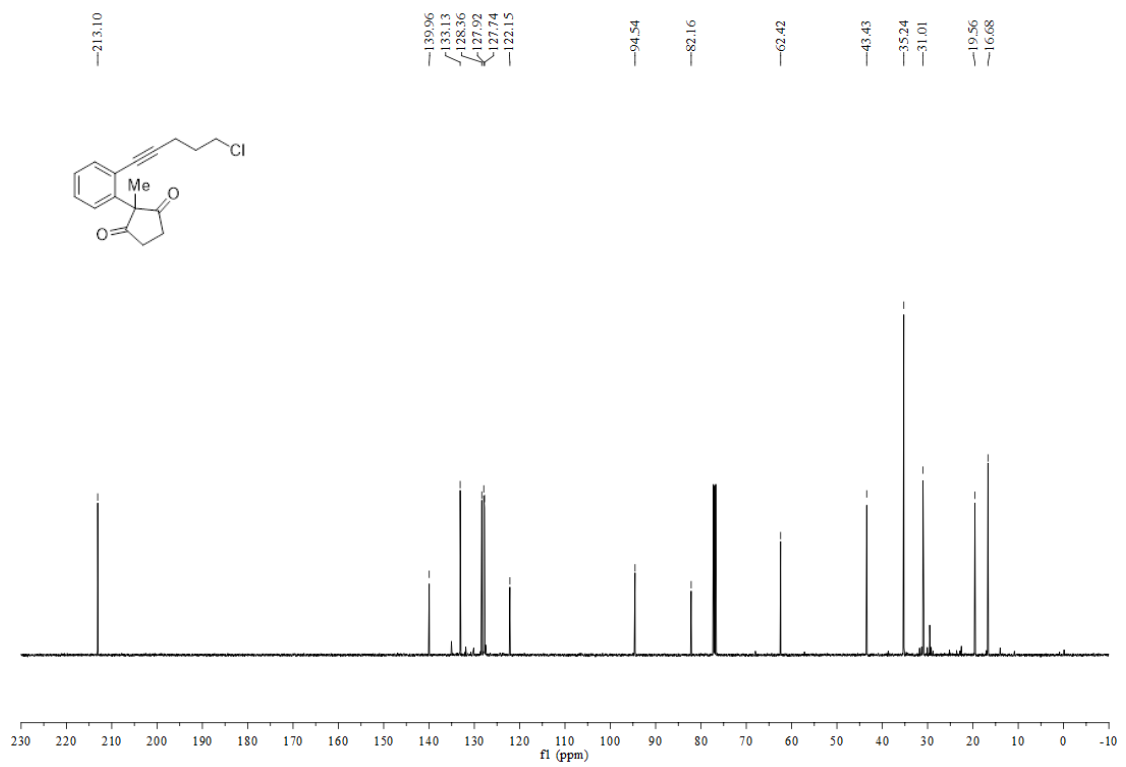

**2-(2-(4-Hydroxybut-1-yn-1-yl)phenyl)-2-methylcyclopentane-1,3-dione (1v)**

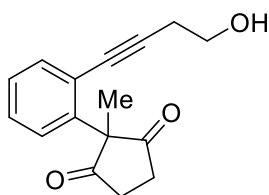

Purified by chromatography on silica gel, eluting with ethyl acetate/petroleum ether 1:5 (v/v); white solid, Mp = 155-156 °C; 69% yield (for the last step);  $^1\text{H}$  NMR (500 MHz,  $\text{CDCl}_3$ )  $\delta$  7.44 (d,  $J = 7.0$  Hz, 1H), 7.40-7.36 (m, 2H), 7.29-7.26 (m, 1H), 3.73 (t,  $J = 6.0$  Hz, 2H), 3.11-3.08 (m, 2H), 2.96-2.92 (m, 2H), 2.56 (t,  $J = 6.0$  Hz, 2H), 2.45 (s, 1H), 1.59 (s, 3H).  $^{13}\text{C}$  NMR (125 MHz,  $\text{CDCl}_3$ )  $\delta$  213.6, 140.0, 133.2, 128.5, 128.0, 127.9, 122.1, 93.8, 82.9, 62.6, 60.5, 35.3, 24.0, 19.6. HRMS  $m/z$  (ESI $^+$ ): Calculated for  $\text{C}_{16}\text{H}_{16}\text{O}_3\text{Na}^+$  ( $[\text{M}+\text{Na}]^+$ ) 279.0992, found 279.0992.

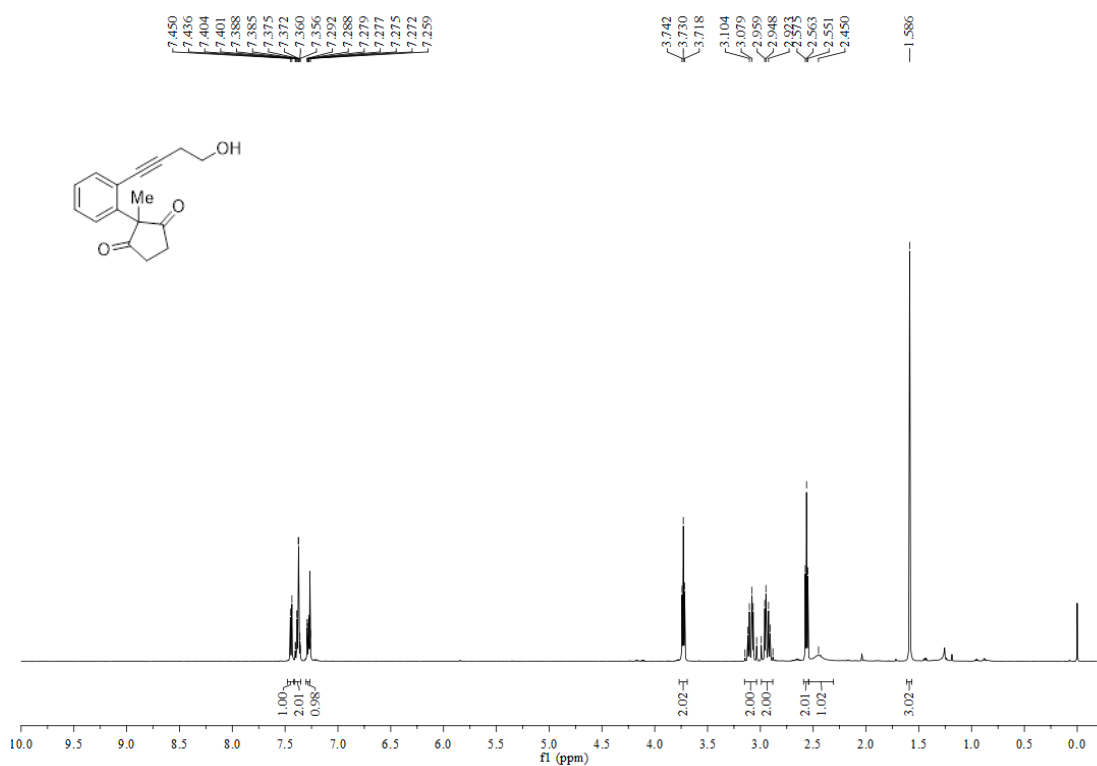

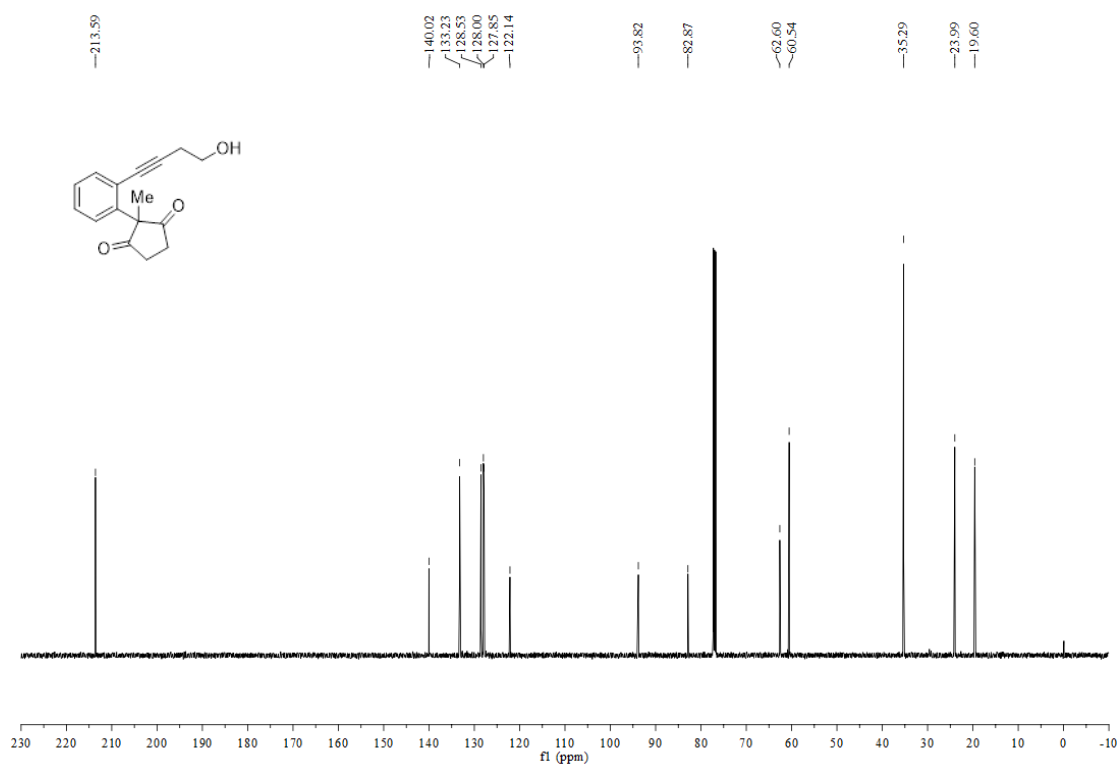

**2-(2-(Dec-1-yn-1-yl)phenyl)-2-methylcyclopentane-1,3-dione (1w)**

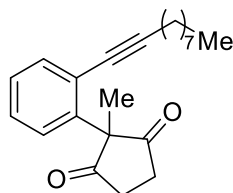

Purified by chromatography on silica gel, eluting with ethyl acetate/petroleum ether 1:5 (v/v); brown solid, Mp = 73-74 °C; 69% yield (for the last step); <sup>1</sup>H NMR (600 MHz, CDCl<sub>3</sub>) δ 7.42 (d, *J* = 7.2 Hz, 1H), 7.35-7.33 (m, 2H), 7.27-7.24 (m, 1H), 3.13-3.04 (m, 2H), 2.89-2.80 (m, 2H), 2.31 (t, *J* = 7.2 Hz, 2H), 1.56 (s, 3H), 1.39-1.35 (m, 2H), 1.34-1.26 (m, 10H), 0.88 (t, *J* = 6.6 Hz, 3H). <sup>13</sup>C NMR (150 MHz, CDCl<sub>3</sub>) δ 213.2, 139.9, 133.1, 128.0, 127.8, 127.7, 122.8, 96.9, 81.4, 62.3, 35.3, 31.7, 29.03, 28.98, 28.9, 28.4, 22.5, 19.58, 19.56, 14.00. HRMS *m/z* (ESI<sup>+</sup>): Calculated for C<sub>22</sub>H<sub>29</sub>O<sub>2</sub><sup>+</sup> ([M+H]<sup>+</sup>) 325.2162, found 325.2162.

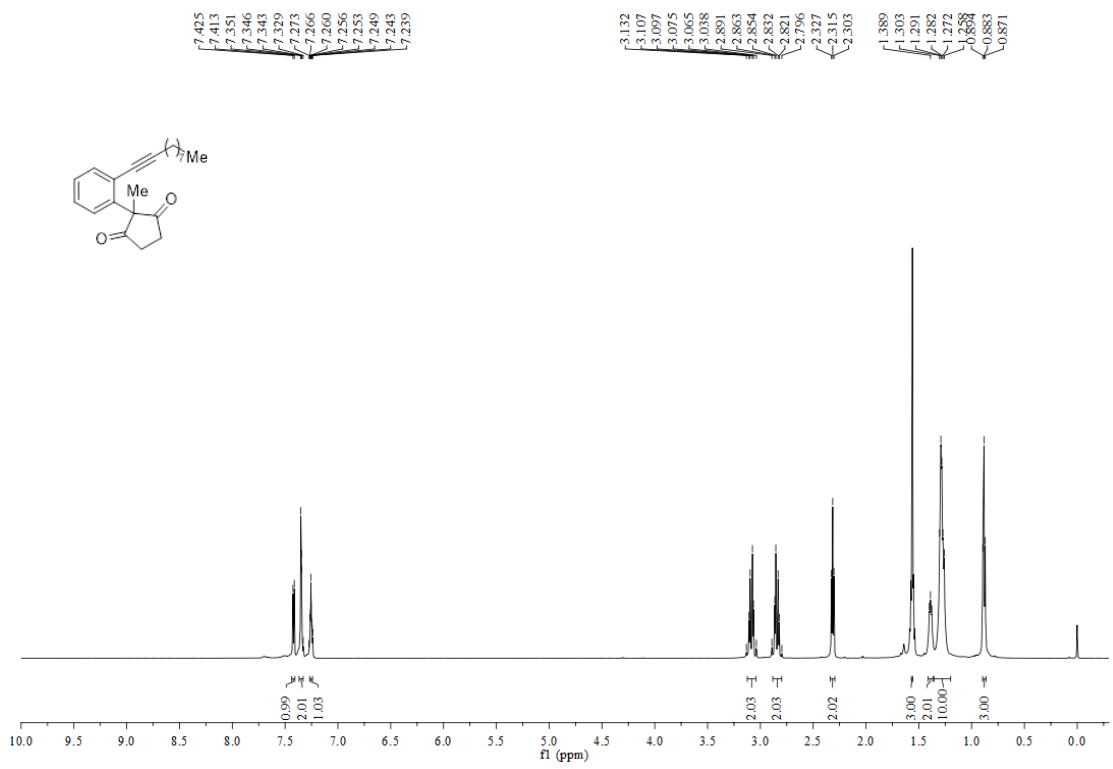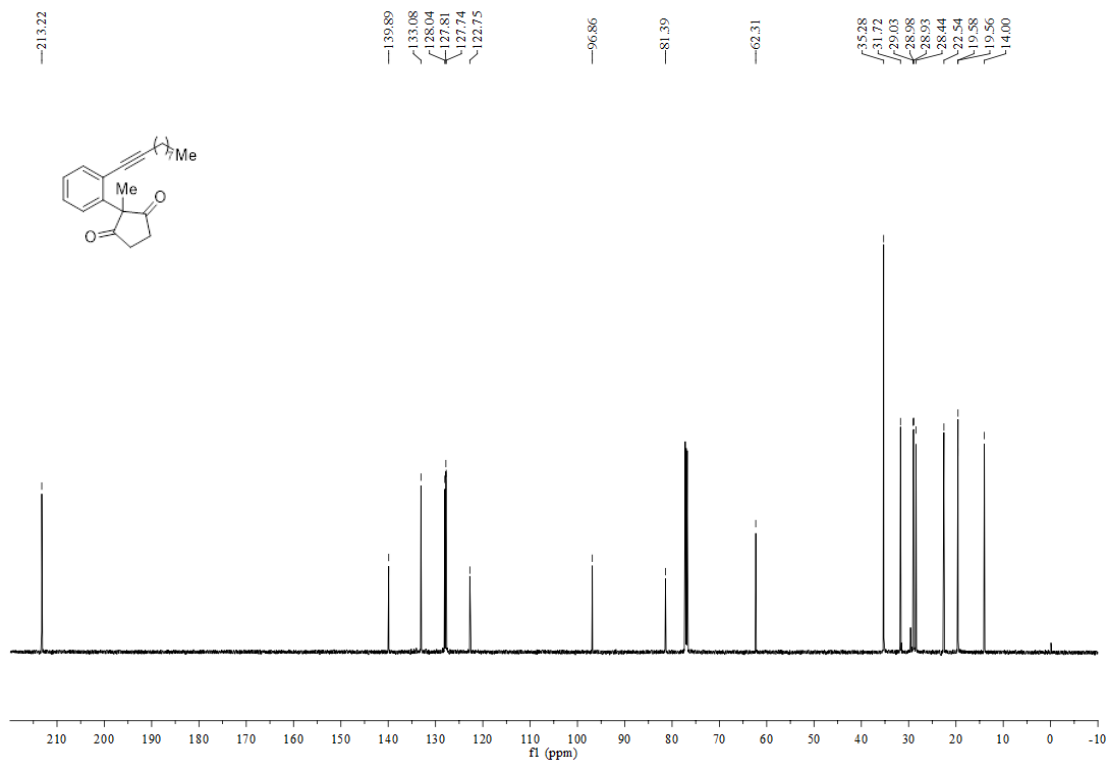

**Benzyl 5-(2-(1-methyl-2,5-dioxocyclopentyl)phenyl)pent-4-ynoate (1x)**

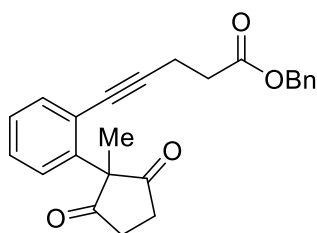

Purified by chromatography on silica gel, eluting with ethyl acetate/petroleum ether 1:5 (v/v); yellow oil; 70% yield (for the last step);  $^1\text{H}$  NMR (500 MHz,  $\text{CDCl}_3$ )  $\delta$  7.38-7.35 (m, 2H), 7.34-7.30 (m, 4H), 7.26-7.22 (m, 1H), 5.15 (s, 2H), 3.13-3.02 (m, 1H), 2.94-2.83 (m, 1H), 2.68-2.61 (m, 1H), 1.56 (s, 3H).  $^{13}\text{C}$  NMR (125 MHz,  $\text{CDCl}_3$ )  $\delta$  213.2, 171.3, 139.9, 135.5, 133.3, 128.5, 128.4, 128.23, 128.22, 127.9, 127.7, 122.1, 94.3, 81.9, 66.6, 62.4, 35.2, 33.1, 19.6, 15.3. HRMS  $m/z$  (ESI $^+$ ): Calculated for  $\text{C}_{24}\text{H}_{22}\text{NaO}_4^+$  ( $[\text{M}+\text{Na}]^+$ ) 397.1410, found 397.1408.

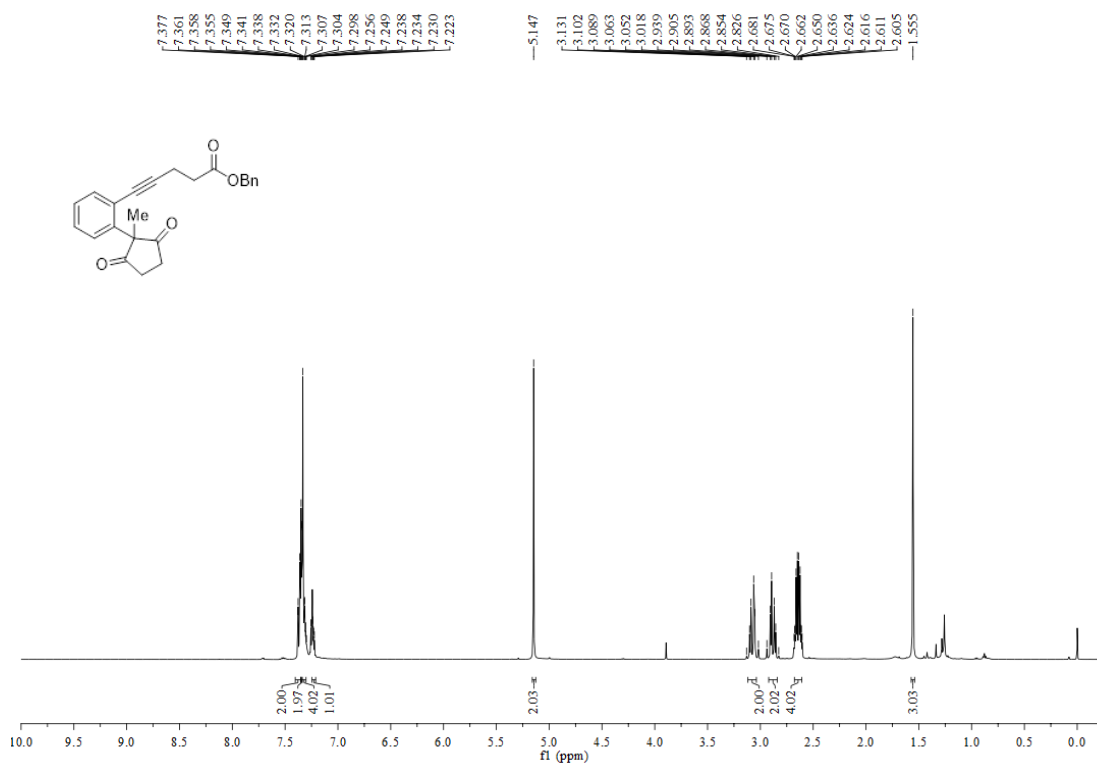

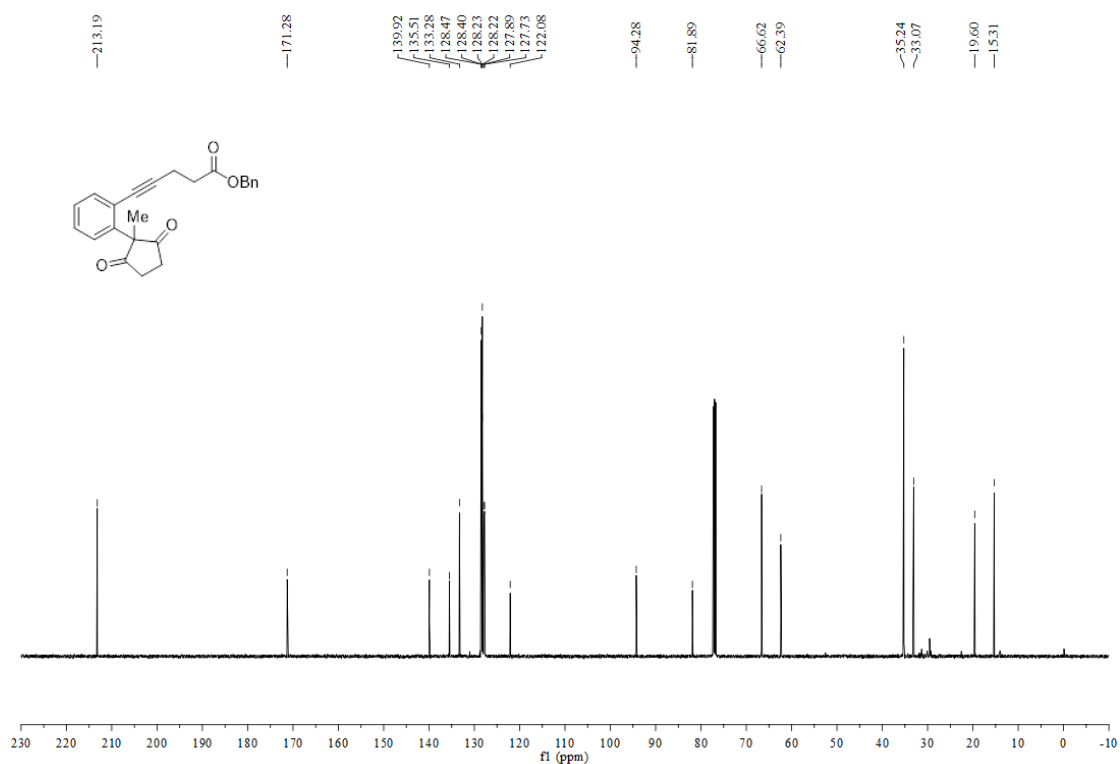

**2-(4-(2-(1-Methyl-2,5-dioxocyclopentyl)phenyl)but-3-yn-1-yl)isoindoline-1,3-dione (1y)**

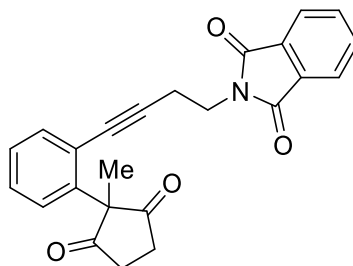

Purified by chromatography on silica gel, eluting with ethyl acetate/petroleum ether 1:5 (v/v); brown solid, Mp = 200-201 °C; 67% yield (for the last step);  $^1\text{H}$  NMR (600 MHz,  $\text{CDCl}_3$ )  $\delta$  7.88-7.86 (m, 2H), 7.75-7.72 (m, 2H), 7.43 (d,  $J = 7.8$  Hz, 1H), 7.39-7.35 (m, 2H), 7.29-7.26 (m, 1H), 3.93 (t,  $J = 7.2$  Hz, 2H), 3.15-3.08 (m, 2H), 2.94-2.87 (m, 2H), 2.76 (t,  $J = 7.2$  Hz, 2H), 1.57 (s, 3H).  $^{13}\text{C}$  NMR (150 MHz,  $\text{CDCl}_3$ )  $\delta$  213.1, 167.9, 140.0, 134.1, 133.3, 131.9, 128.6, 127.90, 127.87, 123.4, 121.9, 92.1, 83.1, 62.5, 36.4, 35.3, 19.6, 19.3. HRMS  $m/z$  (ESI $^+$ ): Calculated for  $\text{C}_{24}\text{H}_{19}\text{NNaO}_4^+$  ( $[\text{M}+\text{Na}]^+$ ) 408.1206, found 408.1203.

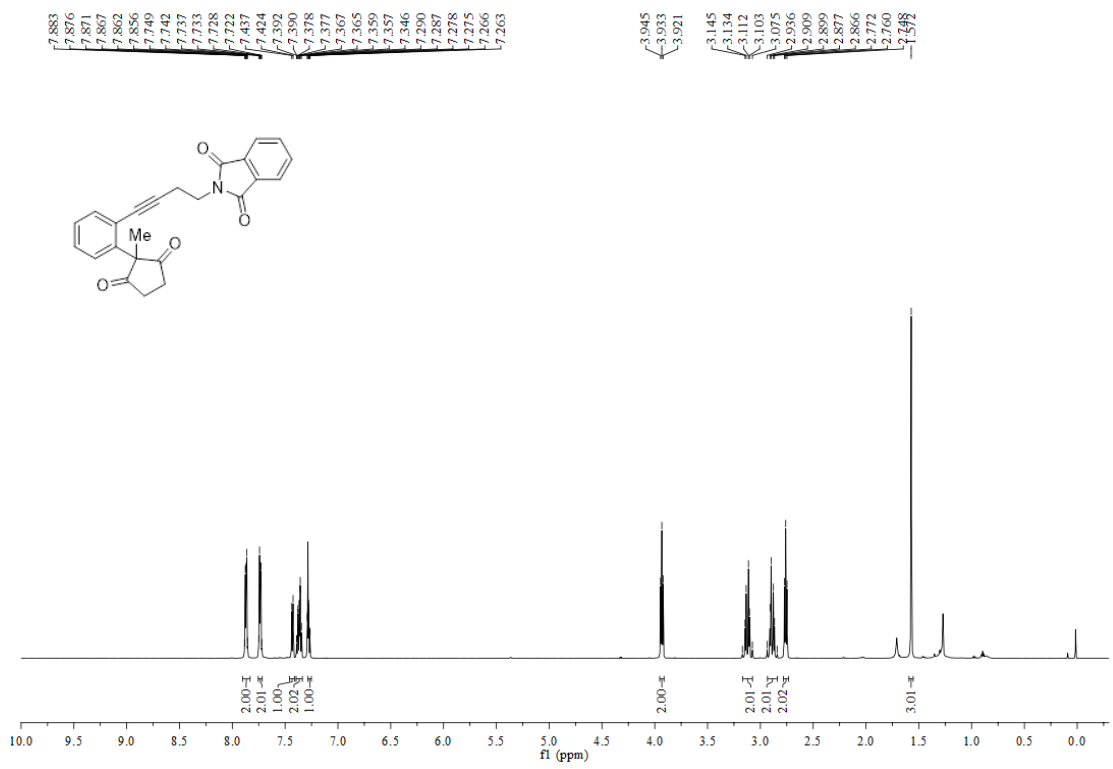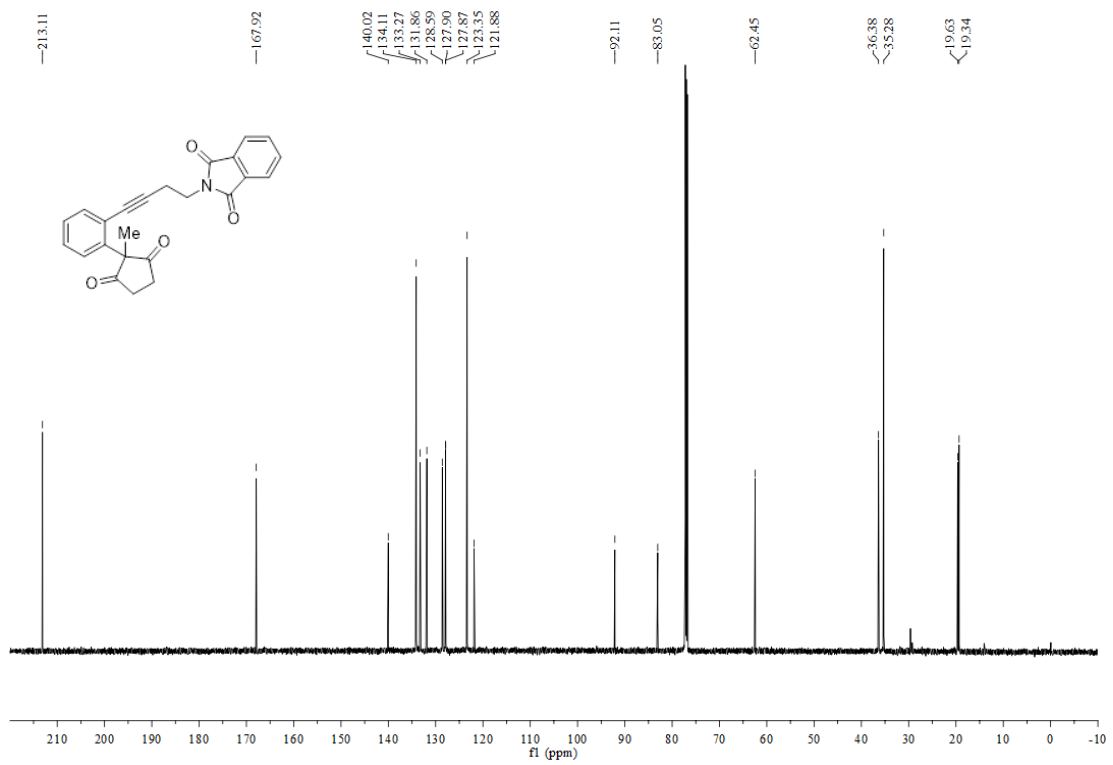



**2-Methyl-2-(5-methyl-2-(phenylethynyl)phenyl)cyclopentane-1,3-dione(1z)**

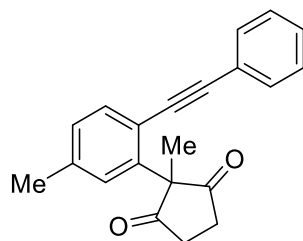

Purified by chromatography on silica gel, eluting with ethyl acetate/petroleum ether 1:5 (v/v); yellow solid, Mp = 179-180 °C; 65% yield (for the last step); <sup>1</sup>H NMR (500 MHz, CDCl<sub>3</sub>) δ 7.47-7.43 (m, 3H), 7.40-7.34 (m, 3H), 7.23 (s, 1H), 7.14-7.13 (m, 1H), 3.04-2.93 (m, 2H), 2.75-2.64 (m, 2H), 2.41 (s, 3H), 1.61 (s, 3H). <sup>13</sup>C NMR (125 MHz, CDCl<sub>3</sub>) δ 213.5, 140.4, 139.2, 132.9, 131.5, 129.1, 129.0, 128.7, 128.6, 122.1, 118.9, 94.5, 89.9, 62.5, 35.4, 21.8, 19.8. HRMS *m/z* (ESI<sup>+</sup>): Calculated for C<sub>21</sub>H<sub>19</sub>O<sub>2</sub><sup>+</sup> ([M+H]<sup>+</sup>) 303.1380, found 303.1382.

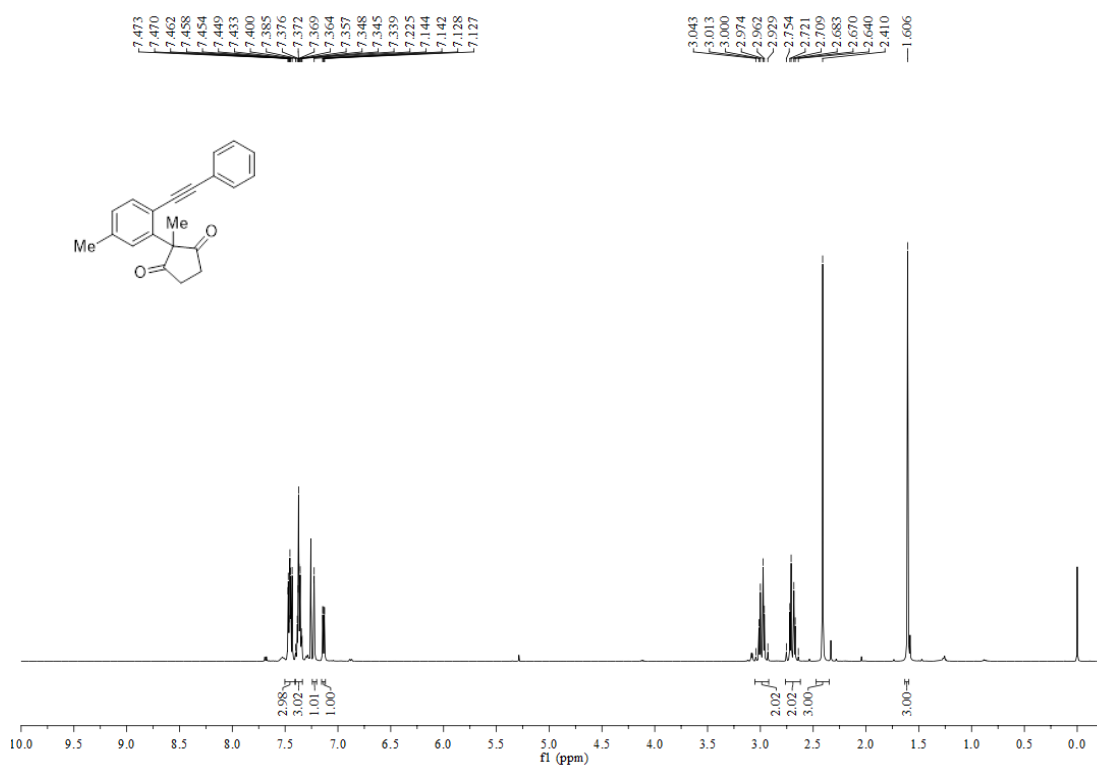

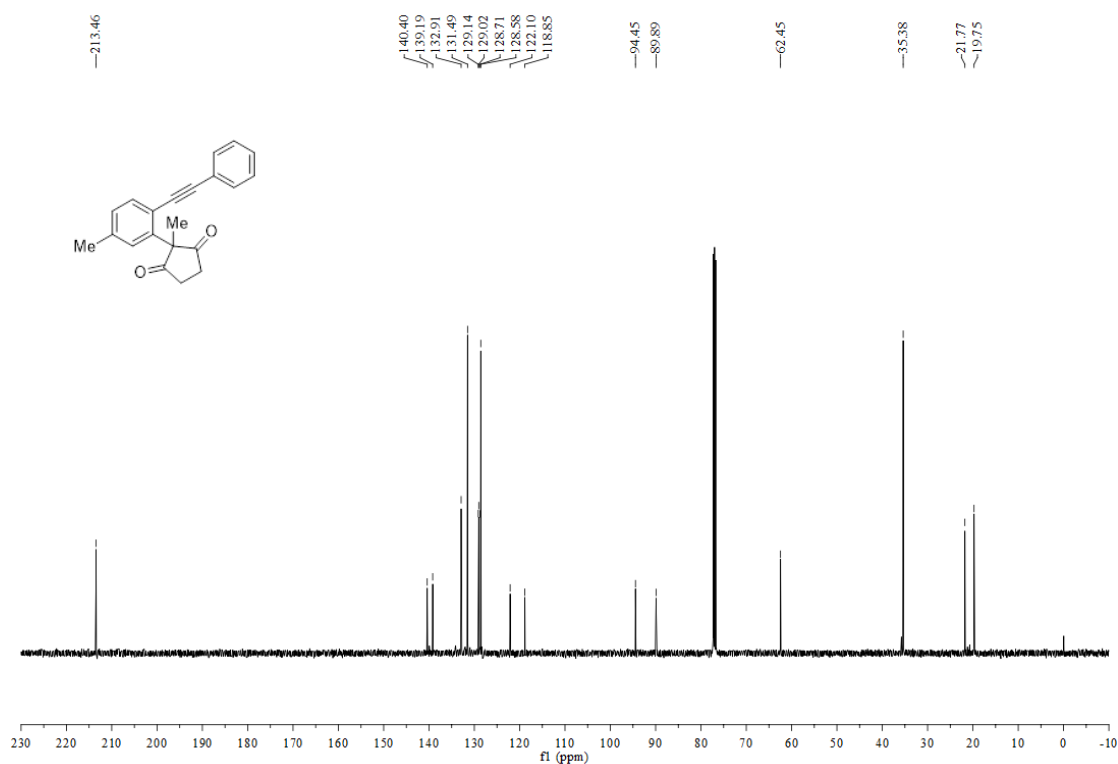

**2-Methyl-2-(2-(phenylethynyl)-5-(trifluoromethyl)phenyl)cyclopentane-1,3-dione (1aa)**

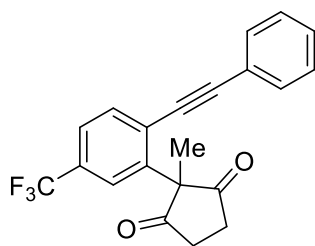

Purified by chromatography on silica gel, eluting with ethyl acetate/petroleum ether 1:5 (v/v); white solid, Mp = 164-165 °C; 75% yield (for the last step); <sup>1</sup>H NMR (600 MHz, CDCl<sub>3</sub>) δ 7.67-7.60 (m, 2H), 7.59 (d, *J* = 8.4 Hz, 1H), 7.49-7.47 (m, 2H), 7.45-7.38 (m, 3H), 3.08-2.99 (m, 2H), 2.75-2.66 (m, 2H), 1.66 (s, 3H). <sup>13</sup>C NMR (150 MHz, CDCl<sub>3</sub>) δ 212.2, 141.6, 133.4, 131.4, 130.6 (q, *J* = 33.0 Hz), 129.8, 128.7, 125.8 (q, *J* = 3.0 Hz), 125.1 (q, *J* = 4.5 Hz), 124.9 (q, *J* = 3.0 Hz), 123.7 (q, *J* = 271.5 Hz), 121.2, 97.4, 88.4, 62.6, 35.4, 19.7. HRMS (ESI) *m/z* Calculated for C<sub>21</sub>H<sub>15</sub>F<sub>3</sub>O<sub>2</sub>Na<sup>+</sup> ([M+Na]<sup>+</sup>) 379.0916, found 379.0920.

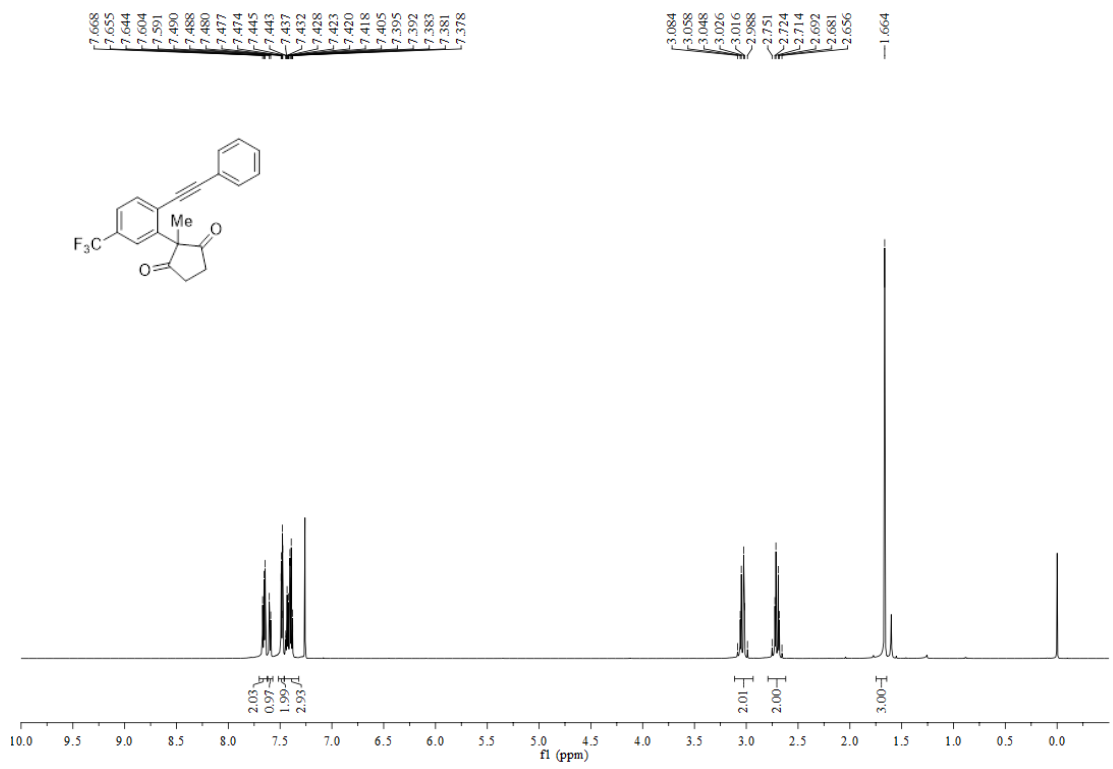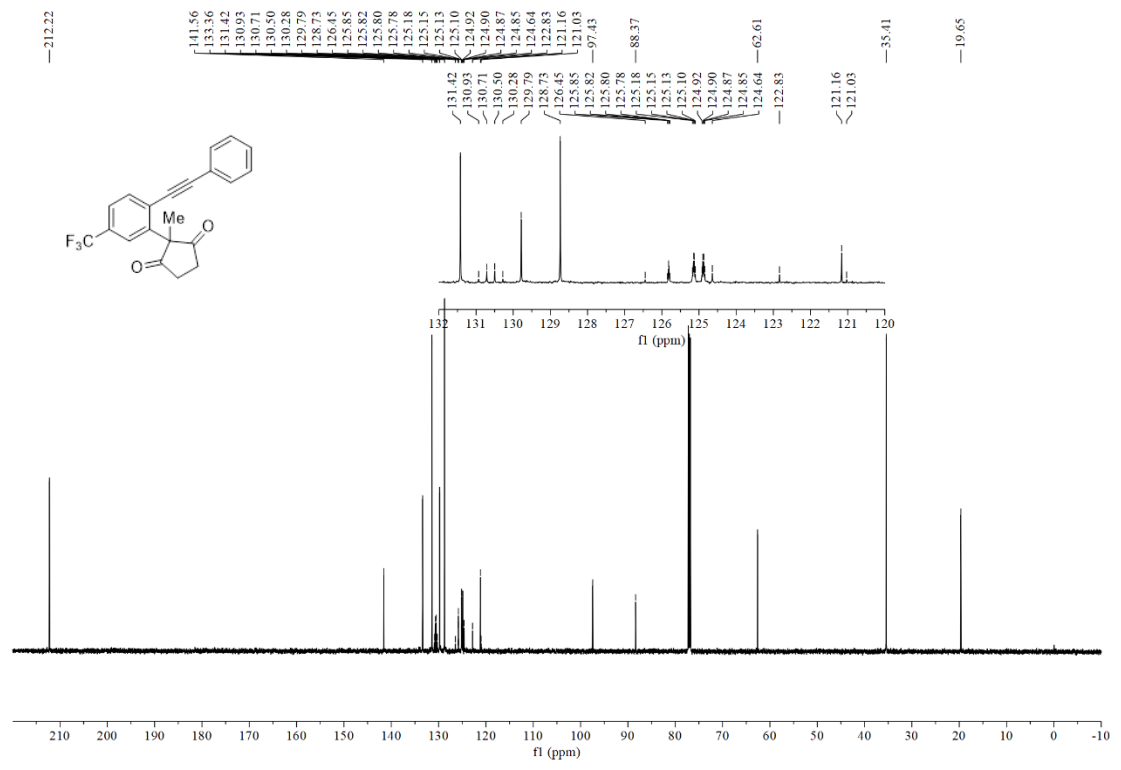

**Methyl 3-(1-methyl-2,5-dioxocyclopentyl)-4-(phenylethynyl)benzoate (1ab)**

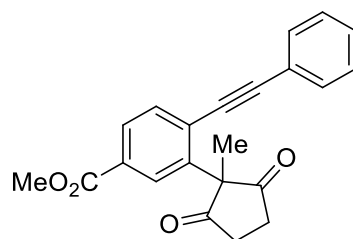

Purified by chromatography on silica gel, eluting with ethyl acetate/petroleum ether 1:5 (v/v); brown solid, Mp = 133-134 °C; 60% yield (for the last step); <sup>1</sup>H NMR (600 MHz, CDCl<sub>3</sub>) δ 8.12 (s, 1H), 8.00 (d, *J* = 8.4 Hz, 1H), 7.61 (d, *J* = 7.8 Hz, 1H), 7.47 (d, *J* = 7.2 Hz, 2H), 7.43-7.37 (m, 3H), 3.93 (s, 3H), 3.07-2.98 (m, 2H), 2.74-2.65 (m, 2H), 1.68 (s, 3H). <sup>13</sup>C NMR (150 MHz, CDCl<sub>3</sub>) δ 212.5, 166.1, 140.9, 133.0, 131.3, 130.1, 129.6, 129.3, 129.0, 128.7, 126.5, 121.3, 97.8, 88.9, 62.6, 52.3, 35.3, 19.8. HRMS *m/z* (ESI<sup>+</sup>): Calculated for C<sub>22</sub>H<sub>19</sub>O<sub>4</sub><sup>+</sup> ([M+H]<sup>+</sup>) 347.1278, found 347.1281.

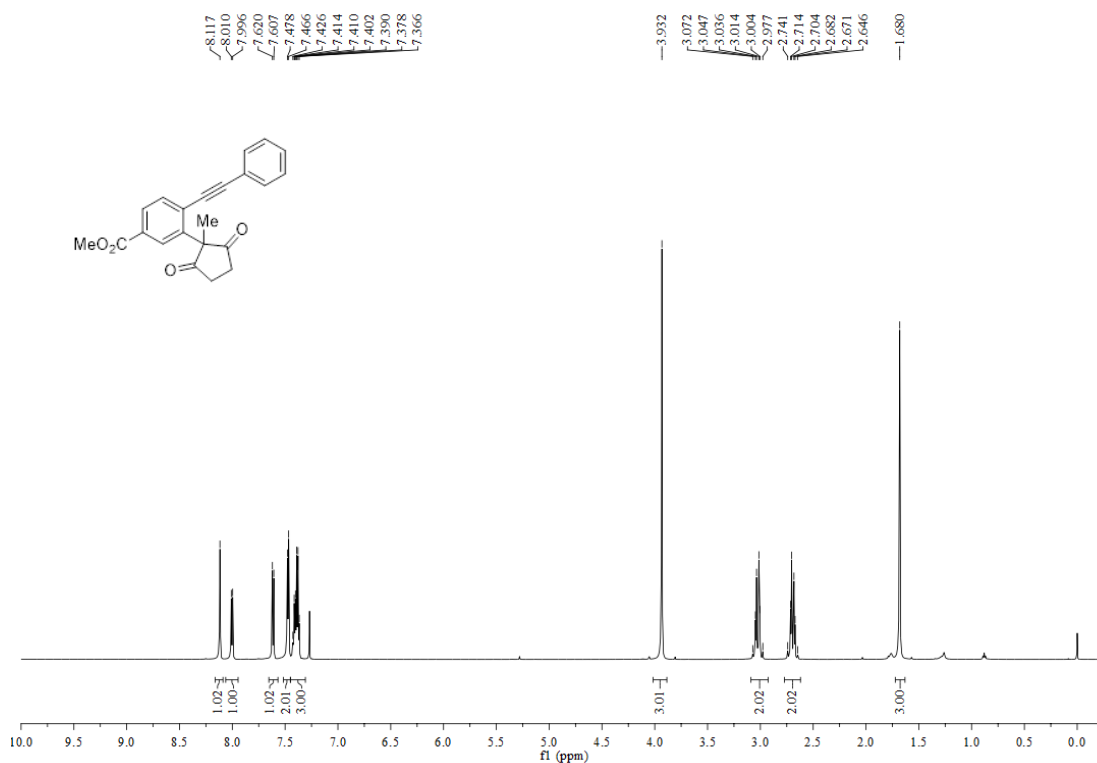

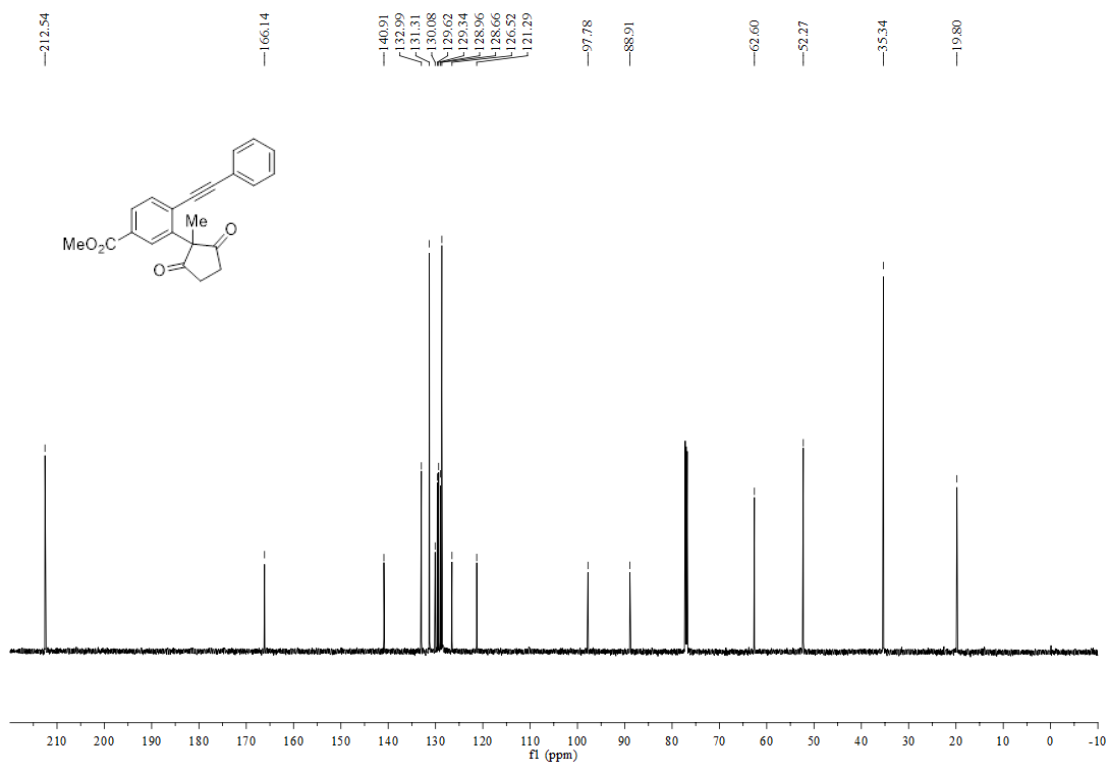

**2-(2,4-Difluoro-6-(phenylethynyl)phenyl)-2-methylcyclopentane-1,3-dione (1ac)**

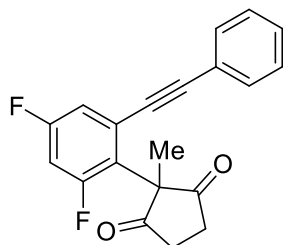

Purified by chromatography on silica gel, eluting with ethyl acetate/petroleum ether 1:5 (v/v); yellow solid, Mp = 120-121 °C; 76% yield (for the last step); <sup>1</sup>H NMR (600 MHz, CDCl<sub>3</sub>) δ 7.47-7.46 (m, 2H), 7.43-7.41 (m, 1H), 7.38 (t, *J* = 7.2 Hz, 2H), 7.09 (dd, *J* = 8.4, 1.8 Hz, 1H), 6.88-6.84 (m, 1H), 3.08-2.98 (m, 2H), 2.68-2.59 (m, 2H), 1.80 (d, *J* = 6.6 Hz, 3H). <sup>13</sup>C NMR (150 MHz, CDCl<sub>3</sub>) δ 211.7, 163.6 (dd, *J* = 249.0, 12.0 Hz), 161.5 (dd, *J* = 249.0, 15.0 Hz), 131.4, 129.8, 128.7, 125.8 (dd, *J* = 12.0, 7.5 Hz), 122.9 (dd, *J* = 11.4, 4.3 Hz), 121.1, 116.7 (dd, *J* = 22.5, 3.0 Hz), 105.9 (dd, *J* = 30.0, 24.0 Hz), 96.8, 88.1 (dd, *J* = 4.8, 3.8 Hz), 62.8 (d, *J* = 3.0 Hz), 34.6, 20.2 (d, *J* = 15.0 Hz). HRMS *m/z* (ESI<sup>+</sup>): Calculated for C<sub>20</sub>H<sub>15</sub>F<sub>2</sub>O<sub>2</sub><sup>+</sup> ([M+H]<sup>+</sup>) 325.1035, found 325.1034.

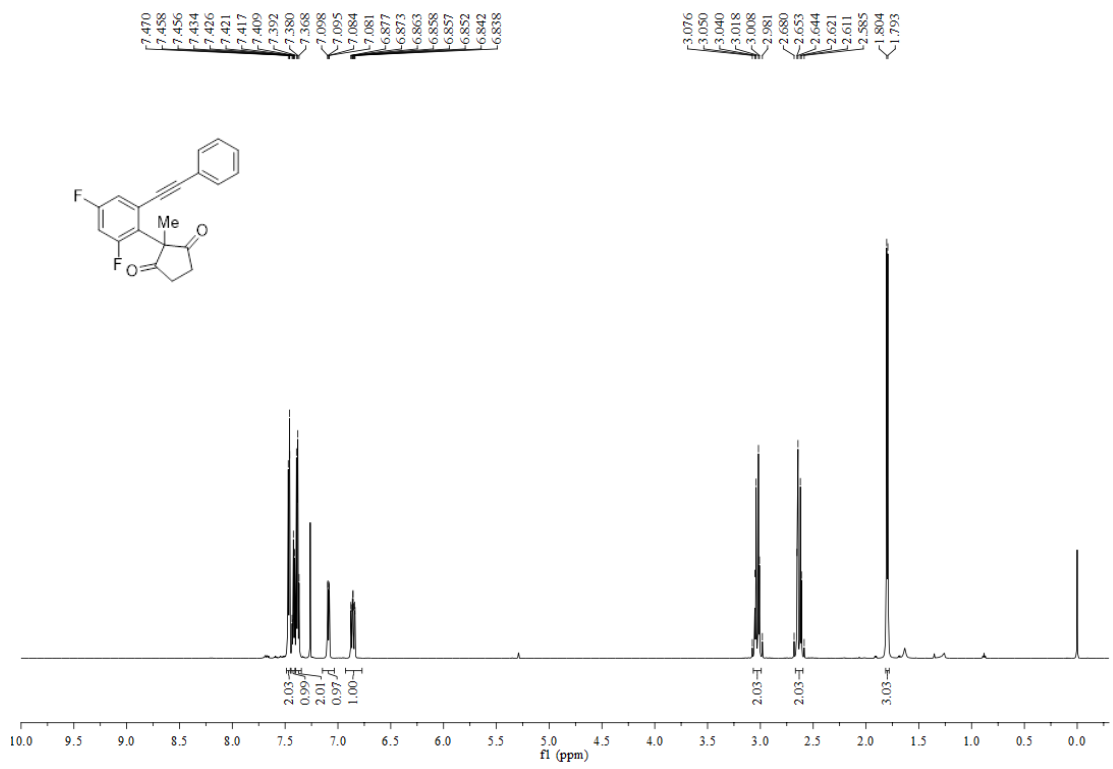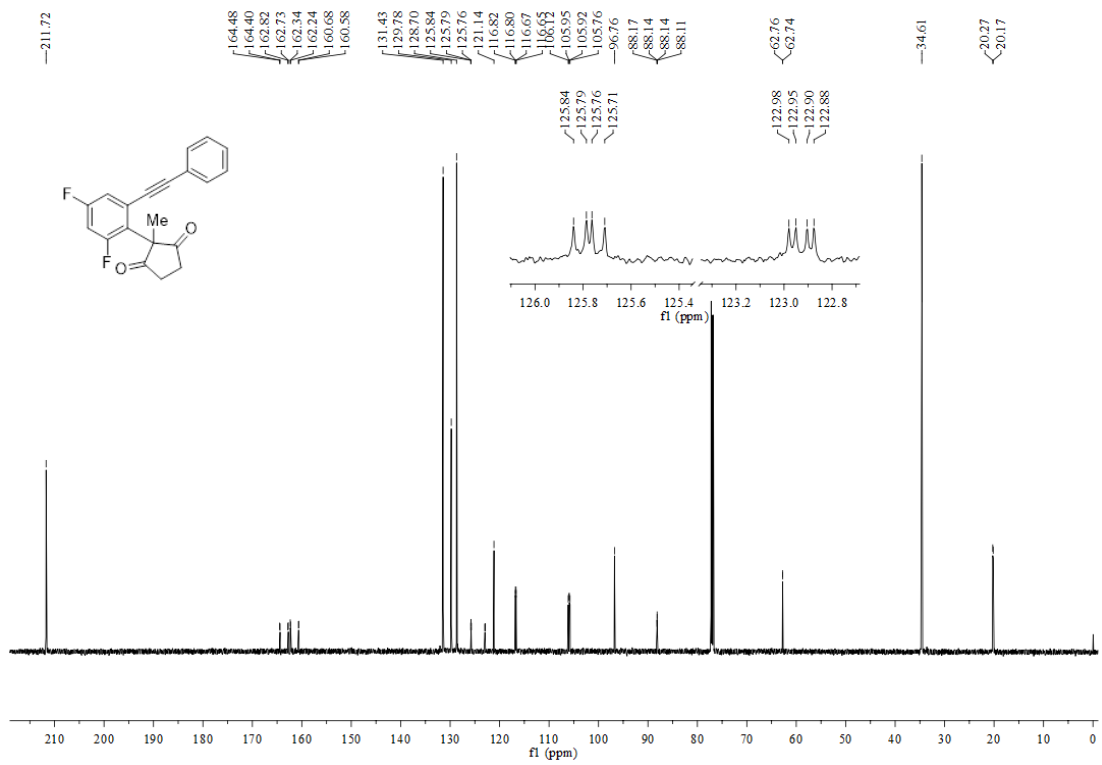

**2-Ethyl-2-(2-(phenylethynyl)phenyl)cyclopentane-1,3-dione (1ad)**

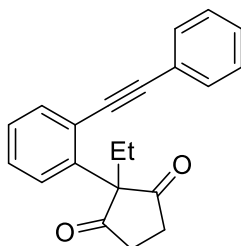

Purified by chromatography on silica gel, eluting with ethyl acetate/petroleum ether 1:5 (v/v); yellow solid, Mp = 119-120 °C; 82% yield (for the last step); <sup>1</sup>H NMR (500 MHz, CDCl<sub>3</sub>) δ 7.57 (d, *J* = 7.5 Hz, 1H), 7.50 (dd, *J* = 7.5, 1.5 Hz, 2H), 7.44 (d, *J* = 3.5 Hz, 2H), 7.42-7.37 (m, 3H), 7.34-7.31 (m, 1H), 2.95-2.84 (m, 2H), 2.78-2.67 (m, 2H), 2.17 (q, *J* = 7.5 Hz, 2H), 1.11 (t, *J* = 7.5 Hz, 3H). <sup>13</sup>C NMR (125 MHz, CDCl<sub>3</sub>) δ 212.8, 139.9, 133.5, 131.4, 129.2, 128.8, 128.6, 128.5, 127.7, 122.4, 122.0, 95.3, 89.9, 66.8, 36.5, 26.4, 9.0. HRMS (ESI) *m/z* Calculated for C<sub>21</sub>H<sub>18</sub>O<sub>2</sub>Na<sup>+</sup> ([M+Na]<sup>+</sup>) 325.1199, found 325.1199.

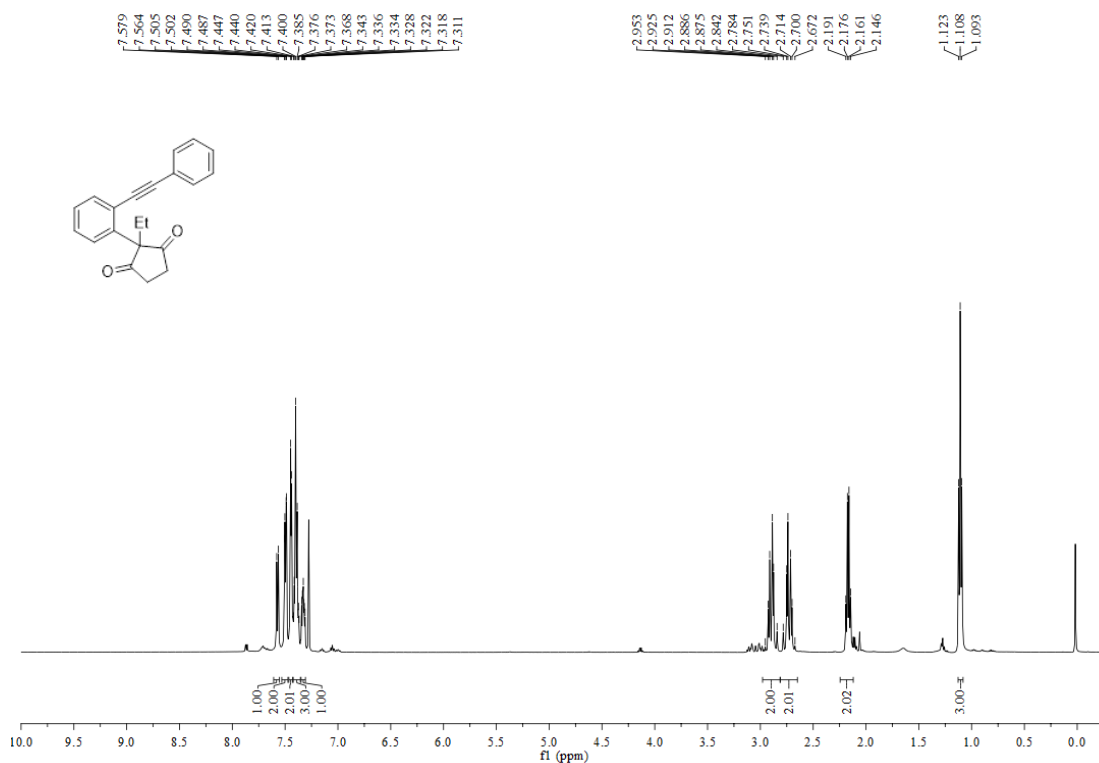

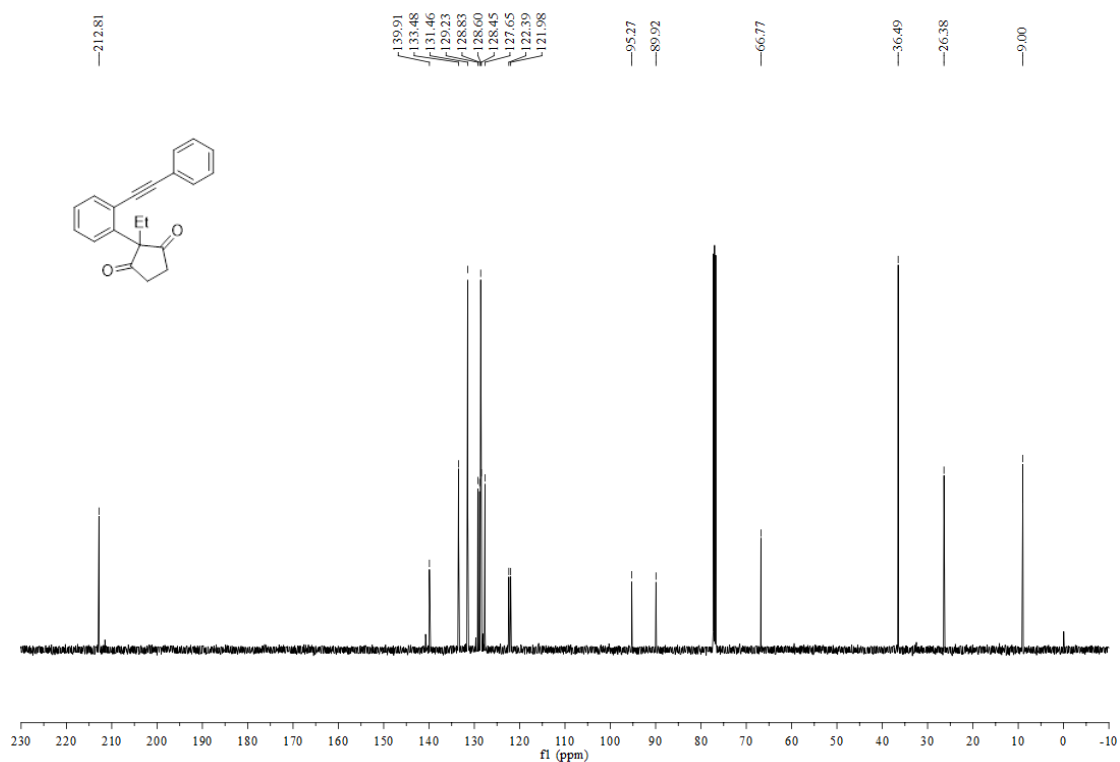

**2-Methyl-2-(2-(prop-1-yn-1-yl)phenyl)-1H-indene-1,3(2H)-dione (1ae)**

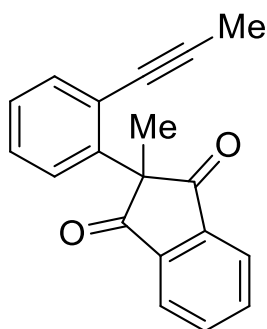

Purified by chromatography on silica gel, eluting with ethyl acetate/petroleum ether 1:5 (v/v); yellow solid, Mp = 157-158 °C; 73% yield (for the last step);  $^1\text{H}$  NMR (400 MHz,  $\text{CDCl}_3$ )  $\delta$  8.09-8.05 (m, 2H), 7.89-7.85 (m, 2H), 7.55-7.53 (m, 1H), 7.42-7.38 (m, 1H), 7.32-7.24 (m, 2H), 1.72 (s, 3H), 1.03 (s, 3H).  $^{13}\text{C}$  NMR (100 MHz,  $\text{CDCl}_3$ )  $\delta$  202.4, 140.5, 138.9, 135.1, 132.5, 128.5, 128.2, 127.9, 123.5, 122.9, 94.2, 81.0, 59.7, 20.8, 3.1. HRMS  $m/z$  (ESI $^+$ ): Calculated for  $\text{C}_{19}\text{H}_{15}\text{O}_2^+$  ( $[\text{M}+\text{H}]^+$ ) 275.1067, found 275.1062.



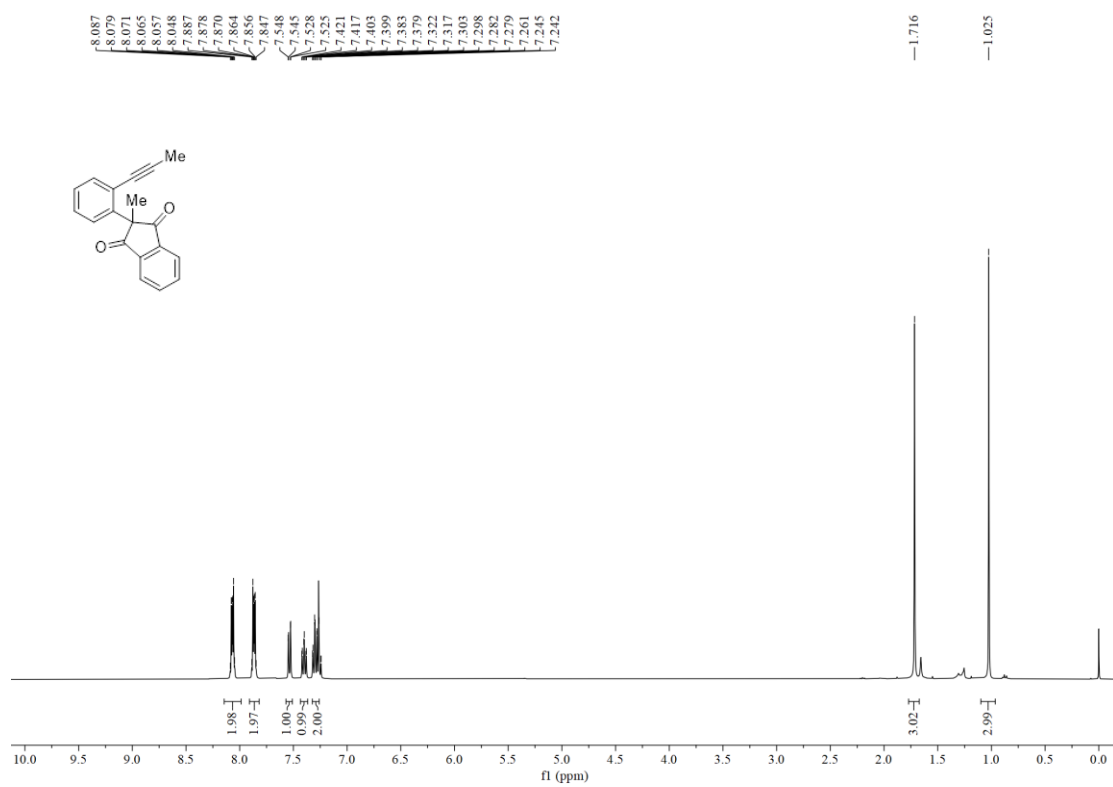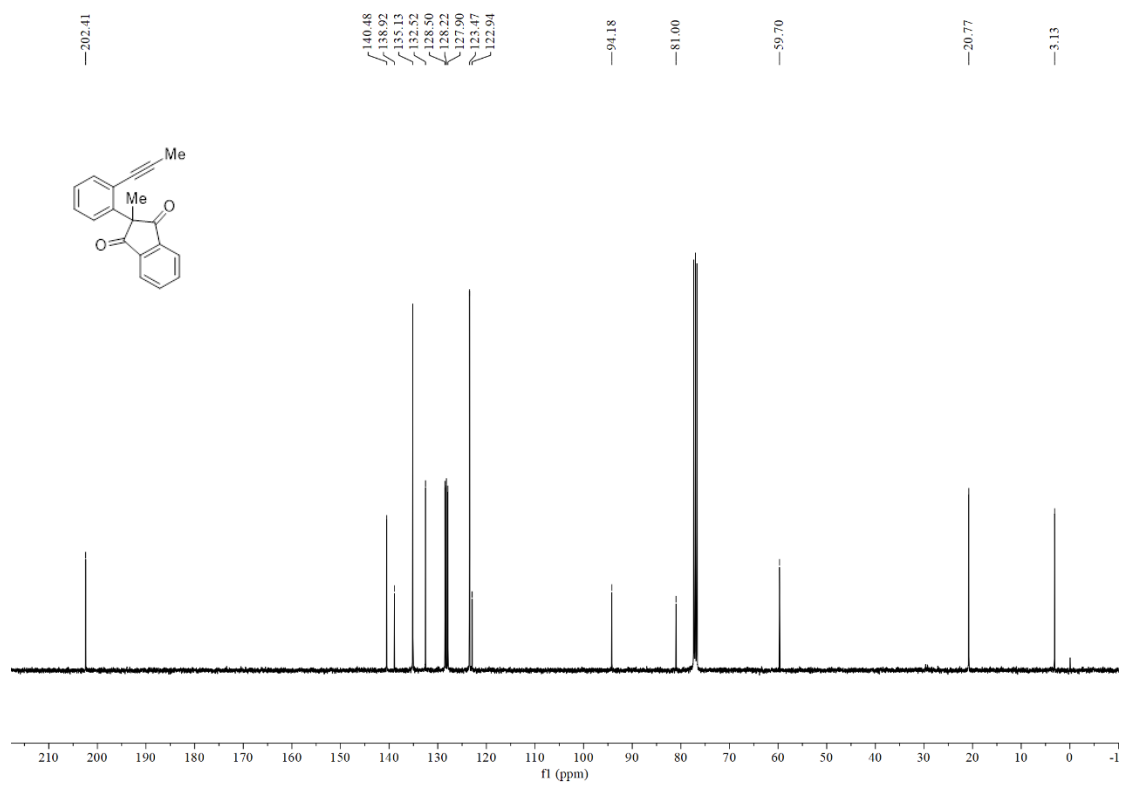

**2-Methyl-2-(2-(phenylethynyl)phenyl)-1H-indene-1,3(2H)-dione (1af)**

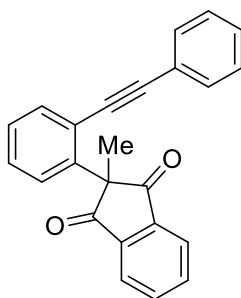

Purified by chromatography on silica gel, eluting with ethyl acetate/petroleum ether 1:5 (v/v); yellow solid, Mp = 169-170 °C; 77% yield (for the last step);  $^1\text{H}$  NMR (600 MHz,  $\text{CDCl}_3$ )  $\delta$  7.88 (dd,  $J = 5.4, 3.0$  Hz, 1H), 7.60-7.57 (m, 2H), 7.49-7.47 (m, 1H), 7.34 (t,  $J = 7.8$  Hz, 1H), 7.16 (t,  $J = 7.8$  Hz, 1H), 7.03 (t,  $J = 7.8$  Hz, 1H), 6.67 (d,  $J = 7.2$  Hz, 1H), 1.74 (s, 2H).  $^{13}\text{C}$  NMR (150 MHz,  $\text{CDCl}_3$ )  $\delta$  202.0, 140.5, 139.0, 134.9, 133.2, 131.1, 128.9, 128.8, 128.4, 128.0, 127.5, 123.5, 122.3, 121.8, 96.1, 89.9, 59.9, 21.2. HRMS  $m/z$  (ESI $^+$ ): Calculated for  $\text{C}_{24}\text{H}_{16}\text{O}_2\text{Na}^+$  ( $[\text{M}+\text{Na}]^+$ ) 359.1043, found 359.1048.

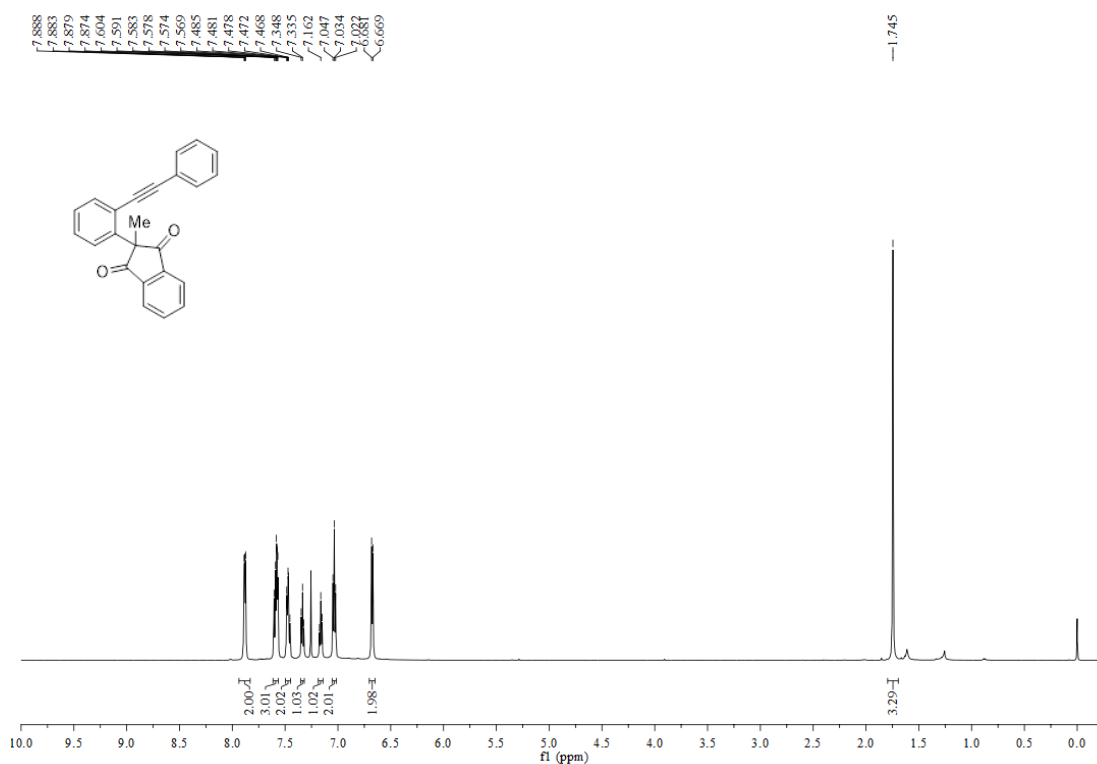

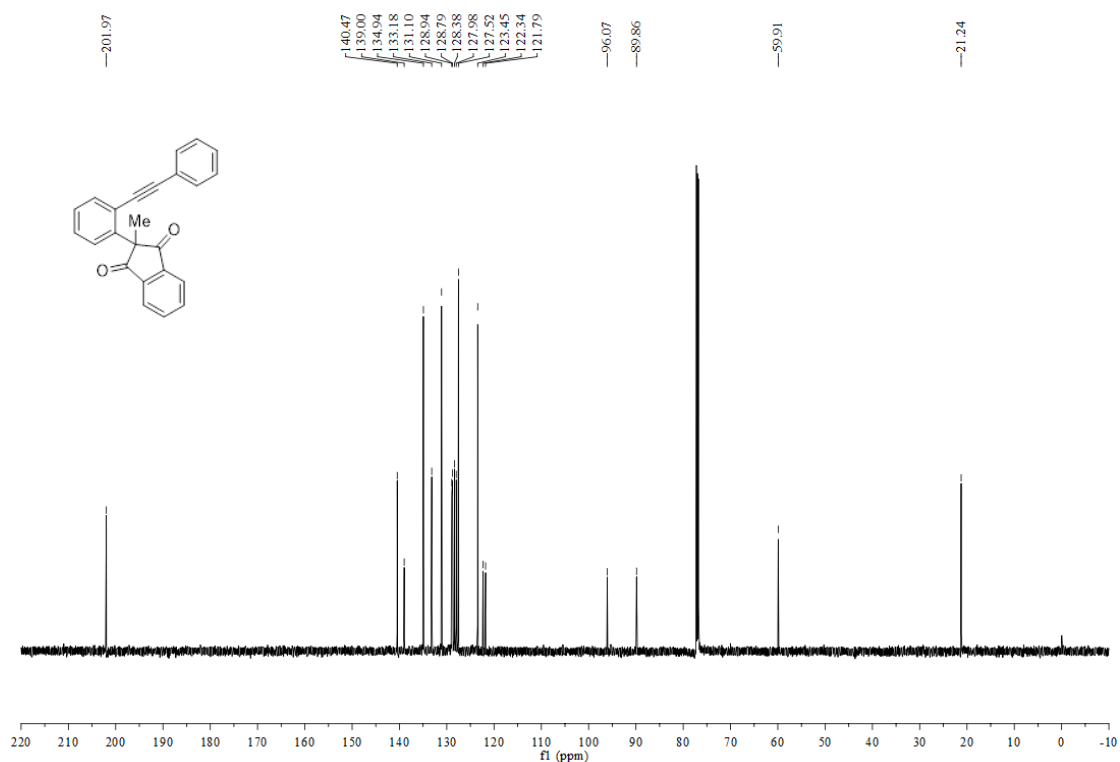

**2-Methyl-2-(2-(*p*-tolylethynyl)phenyl)-1H-indene-1,3(2H)-dione (1ag)**

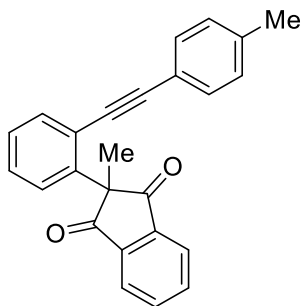

Purified by chromatography on silica gel, eluting with ethyl acetate/petroleum ether 1:5 (v/v); yellow solid, Mp = 154-155 °C; 42% yield (for the last step);  $^1\text{H}$  NMR (500 MHz,  $\text{CDCl}_3$ )  $\delta$  7.90-7.88 (m, 2H), 7.61-7.58 (m, 3H), 7.48-7.45 (m, 2H), 7.34-7.32 (m, 1H), 6.85-6.83 (m, 2H), 6.54 (d,  $J = 8.0$  Hz, 2H), 2.26 (s, 3H), 1.74 (s, 3H).  $^{13}\text{C}$  NMR (125 MHz,  $\text{CDCl}_3$ )  $\delta$  202.0, 140.5, 138.9, 138.6, 134.9, 133.2, 131.0, 128.8, 128.3, 127.9, 123.5, 122.6, 118.8, 96.4, 89.3, 59.9, 21.4, 21.3. HRMS  $m/z$  (ESI $^+$ ): Calculated for  $\text{C}_{25}\text{H}_{19}\text{O}_2^+$  ( $[\text{M}+\text{H}]^+$ ) 351.1380, found 351.1374.

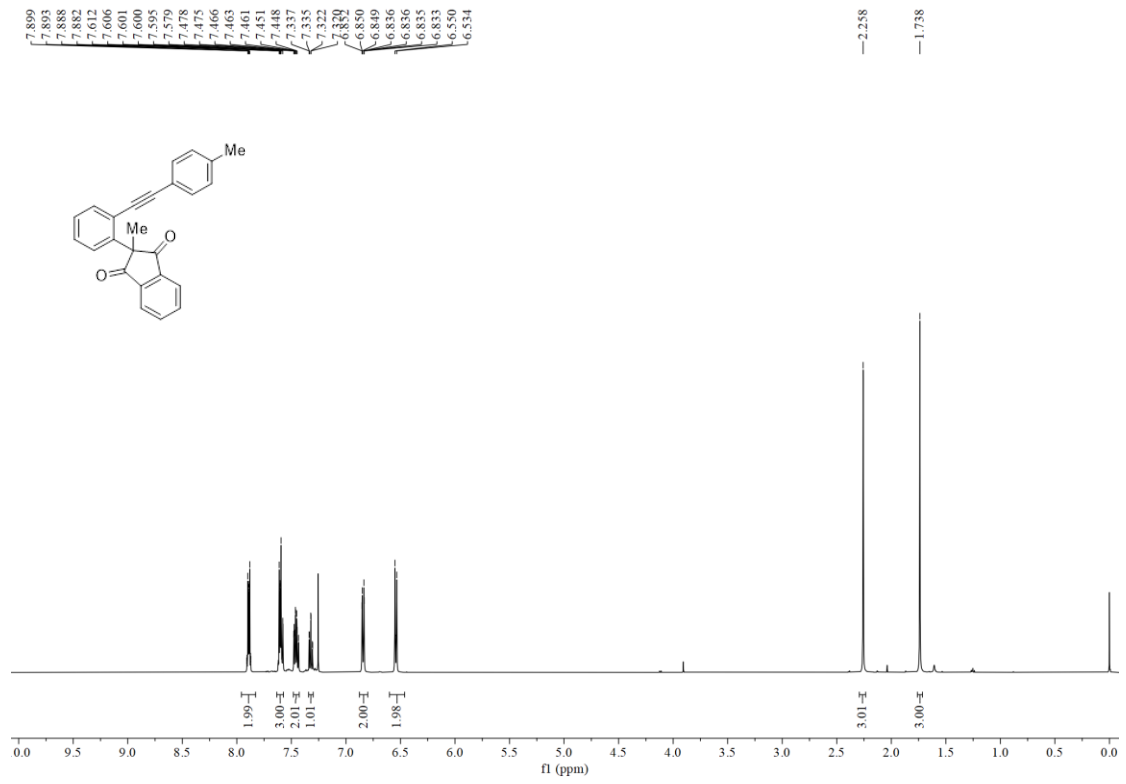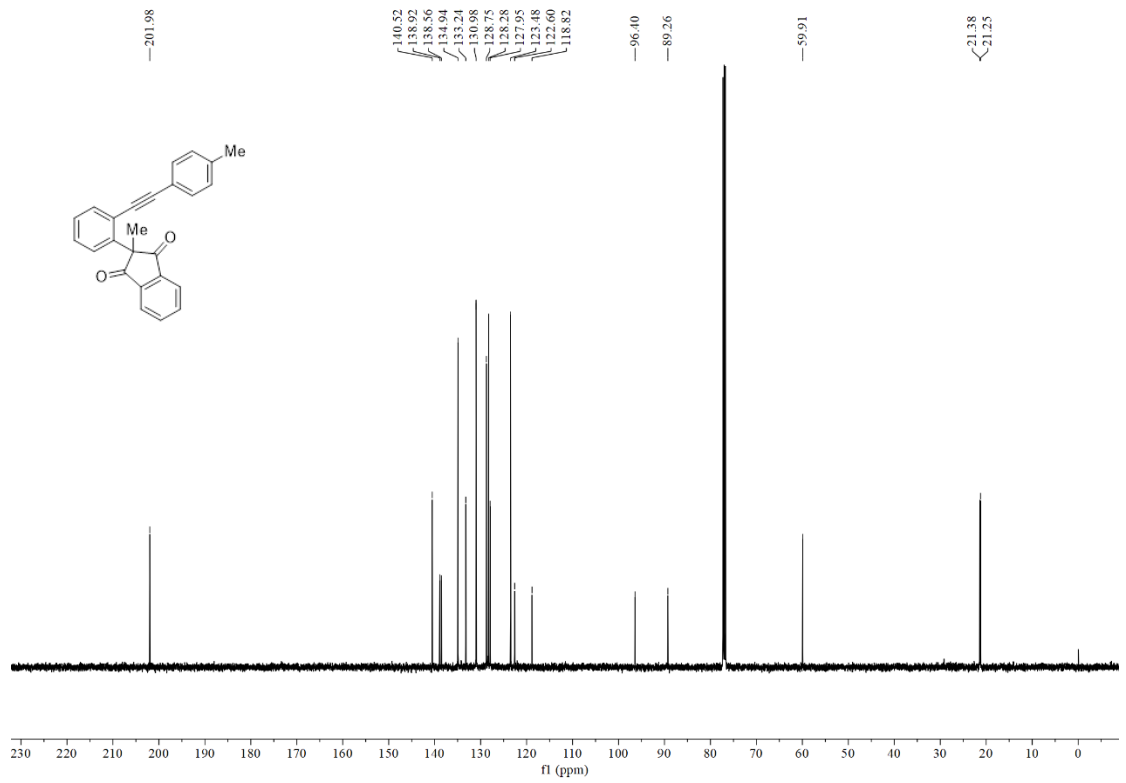

**2-(2-((4-Fluorophenyl)ethynyl)phenyl)-2-methyl-1H-indene-1,3(2H)-dione (1ah)**

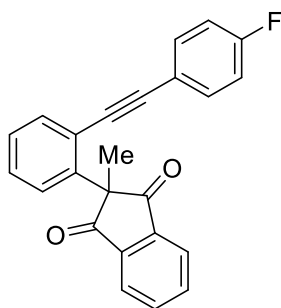

Purified by chromatography on silica gel, eluting with ethyl acetate/petroleum ether 1:5 (v/v); yellow solid, Mp = 140-141 °C; 81% yield (for the last step);  $^1\text{H}$  NMR (400 MHz,  $\text{CDCl}_3$ )  $\delta$  7.90-7.88 (m, 2H), 7.62-7.59 (m, 3H), 7.50-7.46 (m, 2H), 7.36-7.32 (m, 1H), 6.80-6.72 (m, 2H), 6.69-6.65 (m, 2H), 1.75 (s, 3H).  $^{13}\text{C}$  NMR (100 MHz,  $\text{CDCl}_3$ )  $\delta$  201.9, 162.5 (d,  $J=249.0$  Hz), 140.5, 139.1, 135.0, 133.1, 133.0 (d,  $J=8.0$  Hz), 129.1, 128.8, 128.0, 123.4, 122.1, 117.9 (d,  $J=4.0$  Hz), 114.9 (d,  $J=22.0$  Hz), 94.9, 89.6, 59.9, 21.2. HRMS  $m/z$  (ESI $^+$ ): Calculated for  $\text{C}_{24}\text{H}_{15}\text{FO}_2$  ( $[\text{M}]^+$ ) 354.1056, found 354.1061.

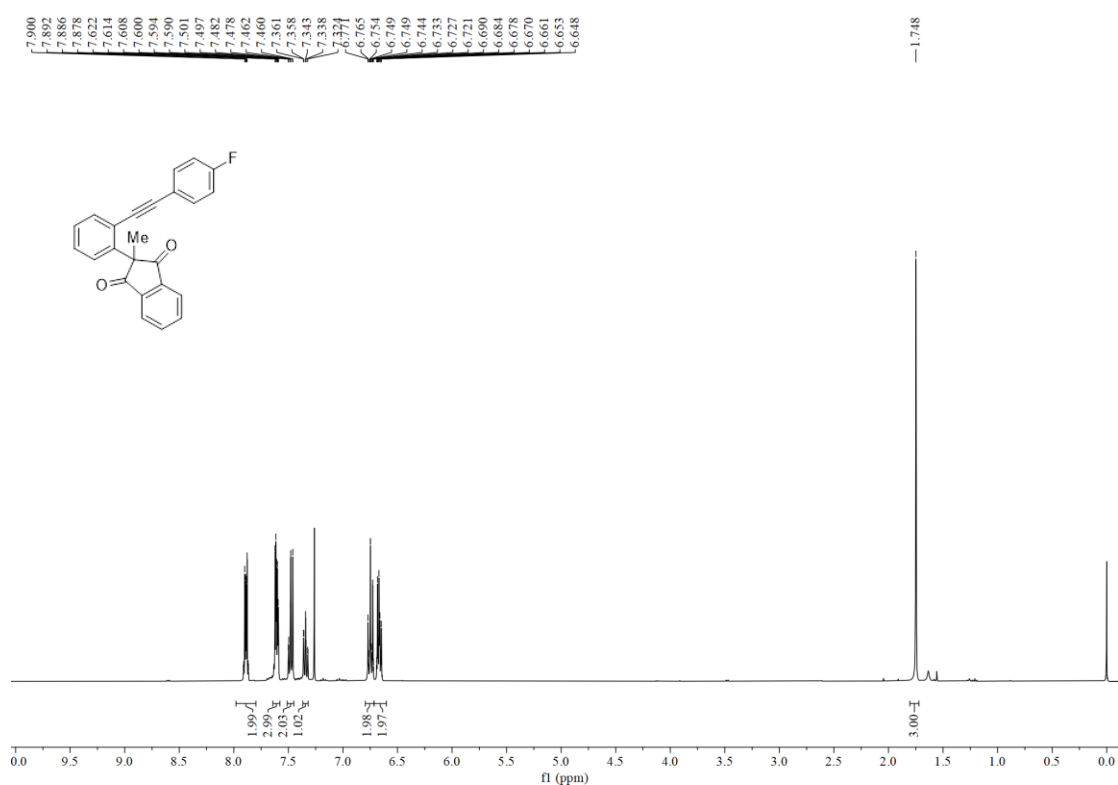

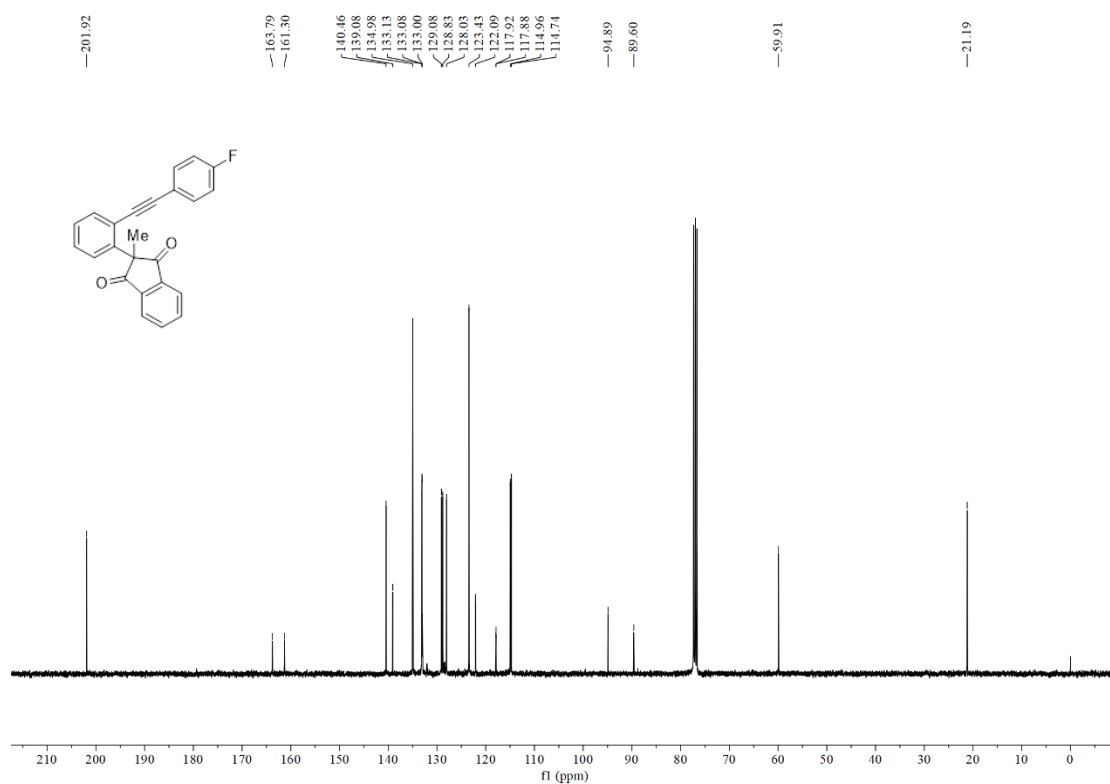

**2-Methyl-2-(2-(*m*-tolylethynyl)phenyl)-1H-indene-1,3(2H)-dione (1ai)**

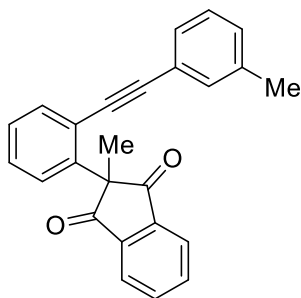

Purified by chromatography on silica gel, eluting with ethyl acetate/petroleum ether 1:5 (v/v); yellow solid, Mp = 145-146 °C; 78% yield (for the last step); <sup>1</sup>H NMR (400 MHz, CDCl<sub>3</sub>) δ 7.92-7.89 (m, 2H), 7.63-7.59 (m, 3H), 7.49-7.44 (m, 2H), 7.35-7.31 (m, 1H), 6.98-6.91 (m, 2H), 6.53 (d, *J* = 7.2 Hz, 1H), 6.37 (s, 1H), 2.17 (s, 3H), 1.74 (s, 3H). <sup>13</sup>C NMR (100 MHz, CDCl<sub>3</sub>) δ 202.0, 140.5, 138.9, 137.1, 134.9, 133.2, 131.5, 129.2, 128.84, 128.78, 128.2, 128.0, 127.4, 123.5, 122.4, 121.6, 96.3, 89.5, 60.0, 21.3, 21.0. HRMS *m/z* (ESI<sup>+</sup>): Calculated for C<sub>25</sub>H<sub>19</sub>O<sub>2</sub><sup>+</sup> ([M+H]<sup>+</sup>) 351.1380, found 351.1374.

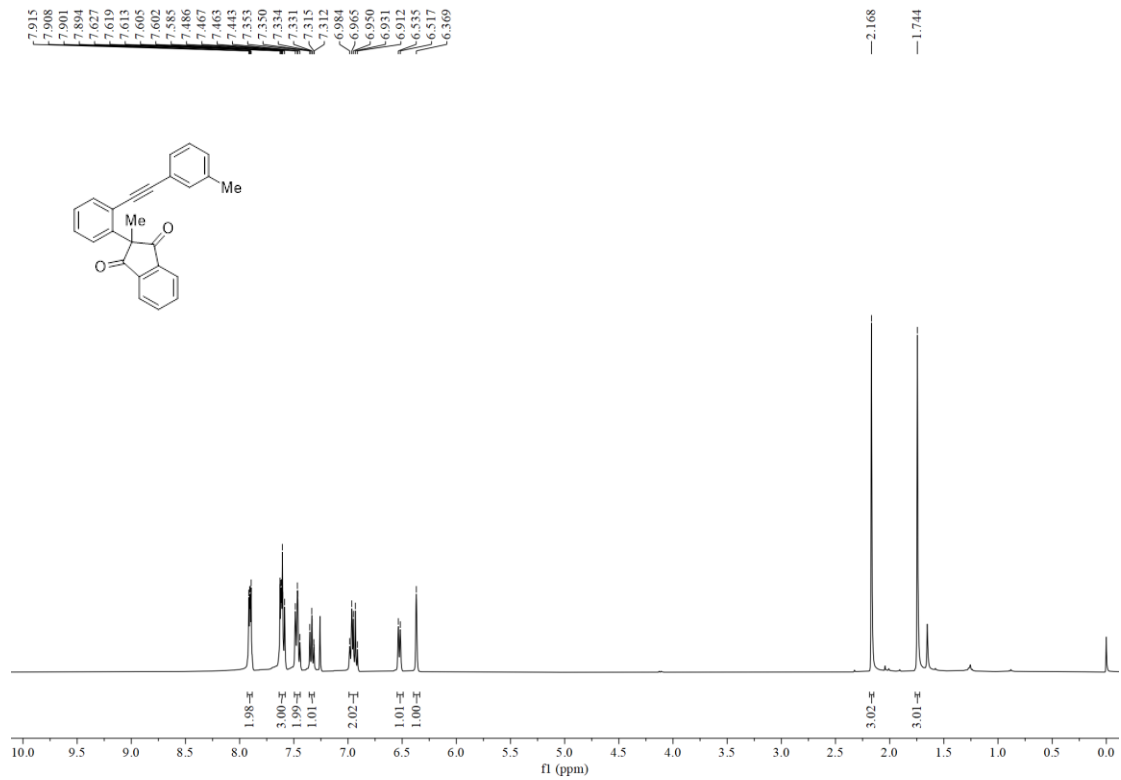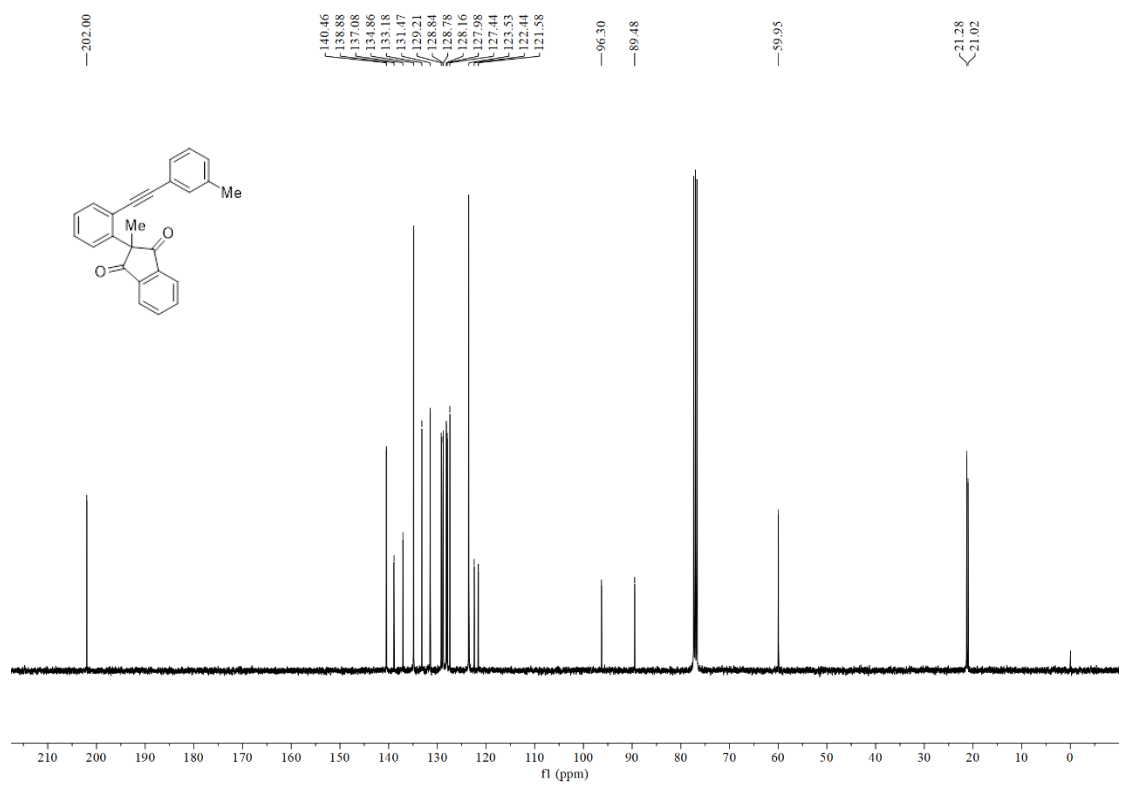

**2-(5-Chloro-2-(phenylethynyl)phenyl)-2-methyl-1H-indene-1,3(2H)-dione (1aj)**

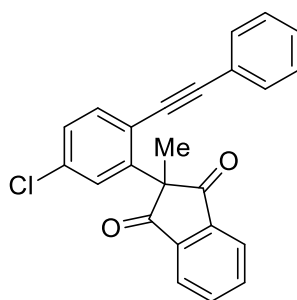

Purified by chromatography on silica gel, eluting with ethyl acetate/petroleum ether 1:5 (v/v); yellow solid, Mp = 139-140 °C; 62% yield (for the last step);  $^1\text{H}$  NMR (400 MHz,  $\text{CDCl}_3$ )  $\delta$  7.90-7.87 (m, 2H), 7.60-7.56 (m, 3H), 7.40 (d,  $J = 8.0$  Hz, 1H), 7.33-7.30 (m, 1H), 7.18-7.16 (m, 1H), 7.06-7.02 (m, 2H), 6.67-6.64 (m, 2H), 1.73 (s, 3H).  $^{13}\text{C}$  NMR (100 MHz,  $\text{CDCl}_3$ )  $\delta$  201.2, 140.8, 140.4, 135.1, 135.0, 134.2, 131.1, 129.5, 128.6, 128.2, 127.6, 123.5, 121.4, 120.9, 96.9, 88.7, 59.7, 21.1. HRMS  $m/z$  (ESI $^+$ ): Calculated for  $\text{C}_{24}\text{H}_{15}\text{ClO}_2^+$  ( $[\text{M}]^+$ ) 370.0761, found 370.0767.

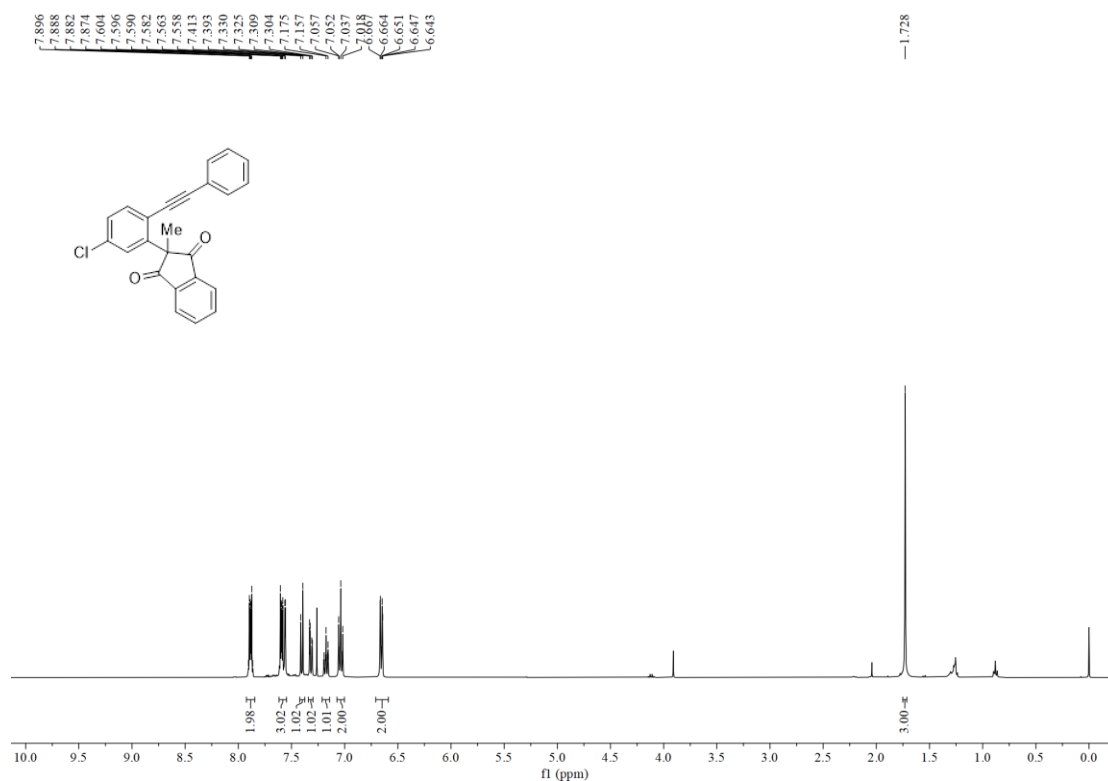



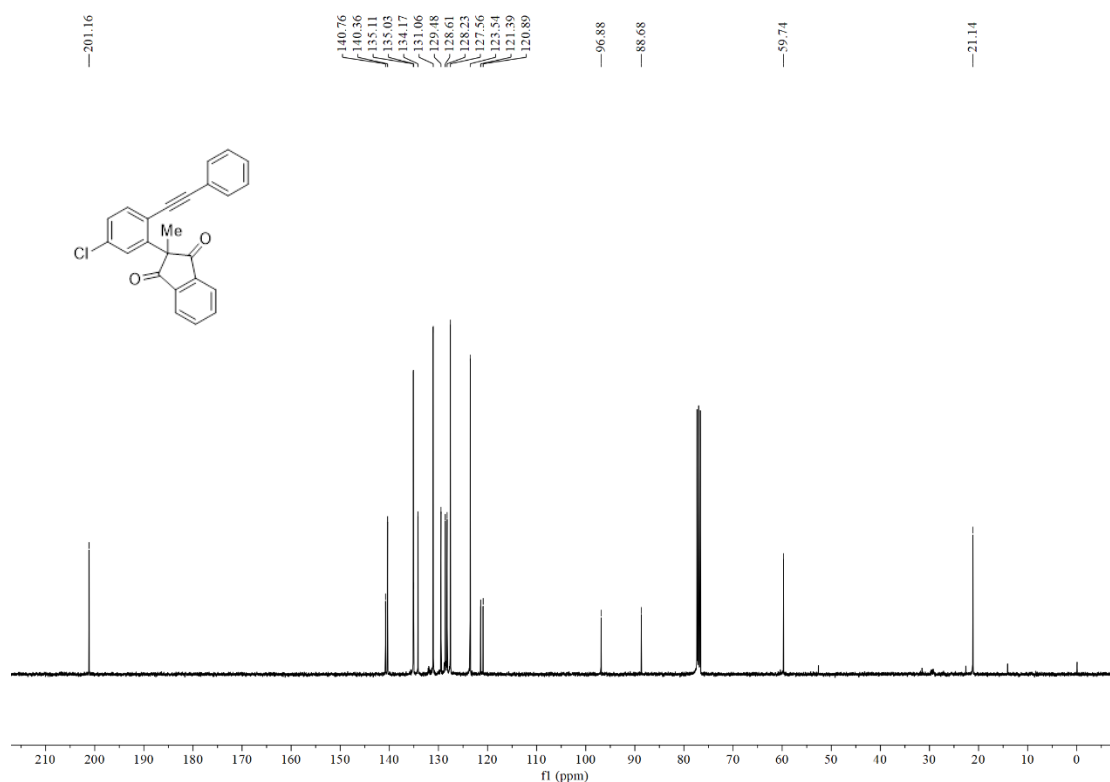

**2-Methyl-2-(2-(phenylethynyl)phenyl)cyclohexane-1,3-dione (1ak)**

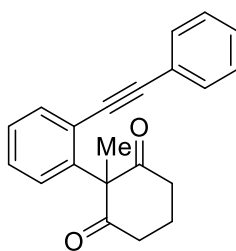

Purified by chromatography on silica gel, eluting with ethyl acetate/petroleum ether 1:5 (v/v); yellow solid, Mp = 129-120 °C; 72% yield (for the last step); <sup>1</sup>H NMR (500 MHz, CDCl<sub>3</sub>) δ 7.57 (dd, *J* = 7.5, 1.5 Hz, 1H), 7.54-7.52 (m, 2H), 7.38-7.35 (m, 4H), 7.30 (t, *J* = 7.5 Hz, 1H), 7.13 (dd, *J* = 7.5, 1.0 Hz, 1H), 2.90-2.84 (m, 2H), 2.73-2.68 (m, 2H), 1.98-1.92 (m, 1H), 1.79-1.71 (m, 1H), 1.64 (s, 3H). <sup>13</sup>C NMR (125 MHz, CDCl<sub>3</sub>) δ 207.2, 141.8, 134.2, 131.3, 129.0, 128.8, 128.4, 127.7, 127.4, 122.5, 122.0, 95.2, 88.0, 73.1, 38.5, 20.3, 18.5. HRMS *m/z* (ESI<sup>+</sup>): Calculated for C<sub>21</sub>H<sub>19</sub>O<sub>2</sub><sup>+</sup> ([M+H]<sup>+</sup>) 303.1380, found 303.1382.

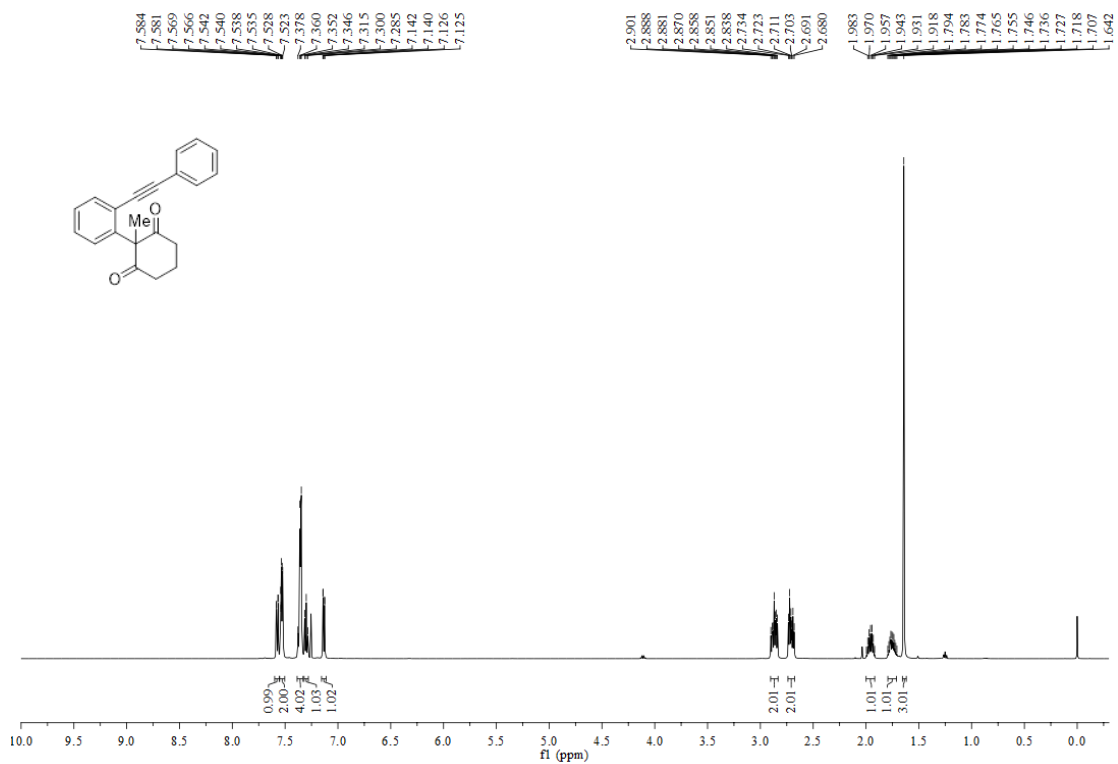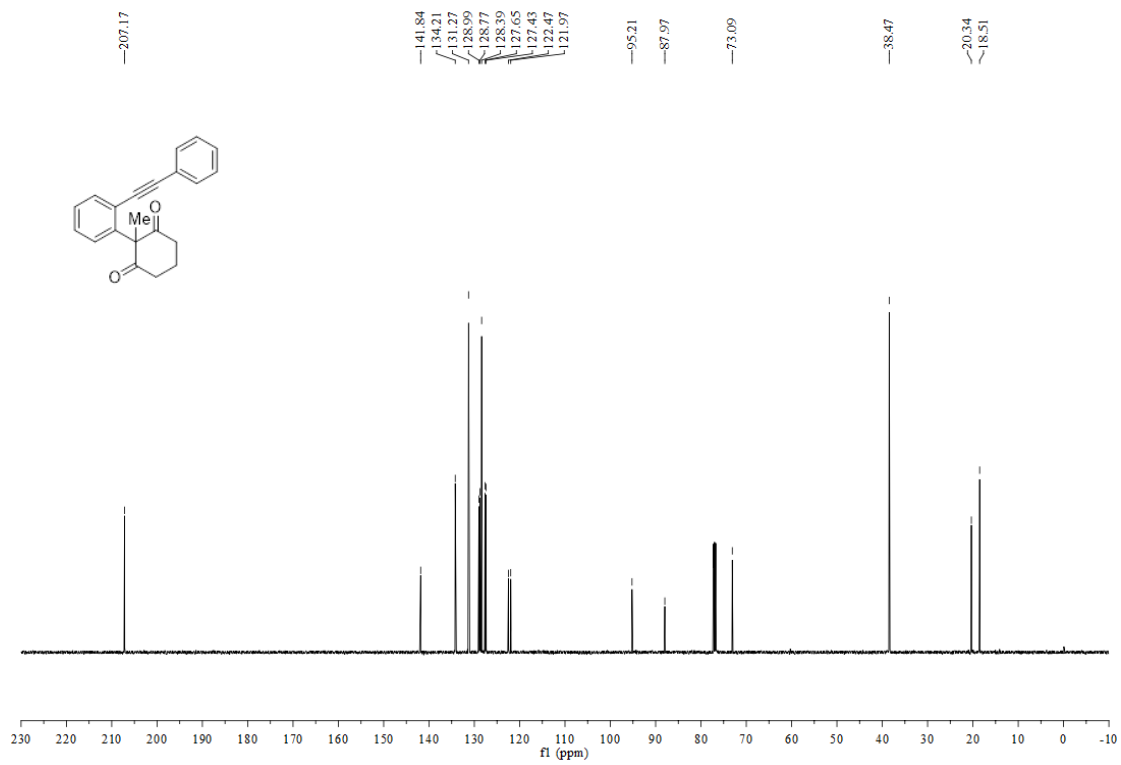

**2-(2-((4-Chlorophenyl)ethynyl)phenyl)-2-methylcyclohexane-1,3-dione (1a)**

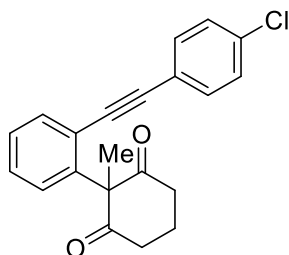

Purified by chromatography on silica gel, eluting with ethyl acetate/petroleum ether 1:5 (v/v); yellow solid, Mp = 120-121 °C; 68% yield (for the last step);  $^1\text{H}$  NMR (400 MHz,  $\text{CDCl}_3$ )  $\delta$  7.56 (d,  $J = 7.6$  Hz, 1H), 7.47 (d,  $J = 7.6$  Hz, 2H), 7.39-7.27 (m, 4H), 7.12 (d,  $J = 7.6$  Hz, 1H), 2.90-2.82 (m, 2H), 2.73-2.66 (m, 2H), 1.99-1.89 (m, 1H), 1.79-1.69 (m, 1H), 1.63 (s, 3H).  $^{13}\text{C}$  NMR (100 MHz,  $\text{CDCl}_3$ )  $\delta$  207.1, 141.8, 134.8, 134.2, 132.4, 129.2, 128.7, 127.6, 127.4, 121.5, 120.9, 93.9, 88.7, 73.3, 38.4, 20.2, 18.5. HRMS  $m/z$  (ESI $^+$ ): Calculated for  $\text{C}_{21}\text{H}_{17}\text{ClO}_2\text{Na}^+$  ( $[\text{M}+\text{Na}]^+$ ) 359.0809, found 359.0814.

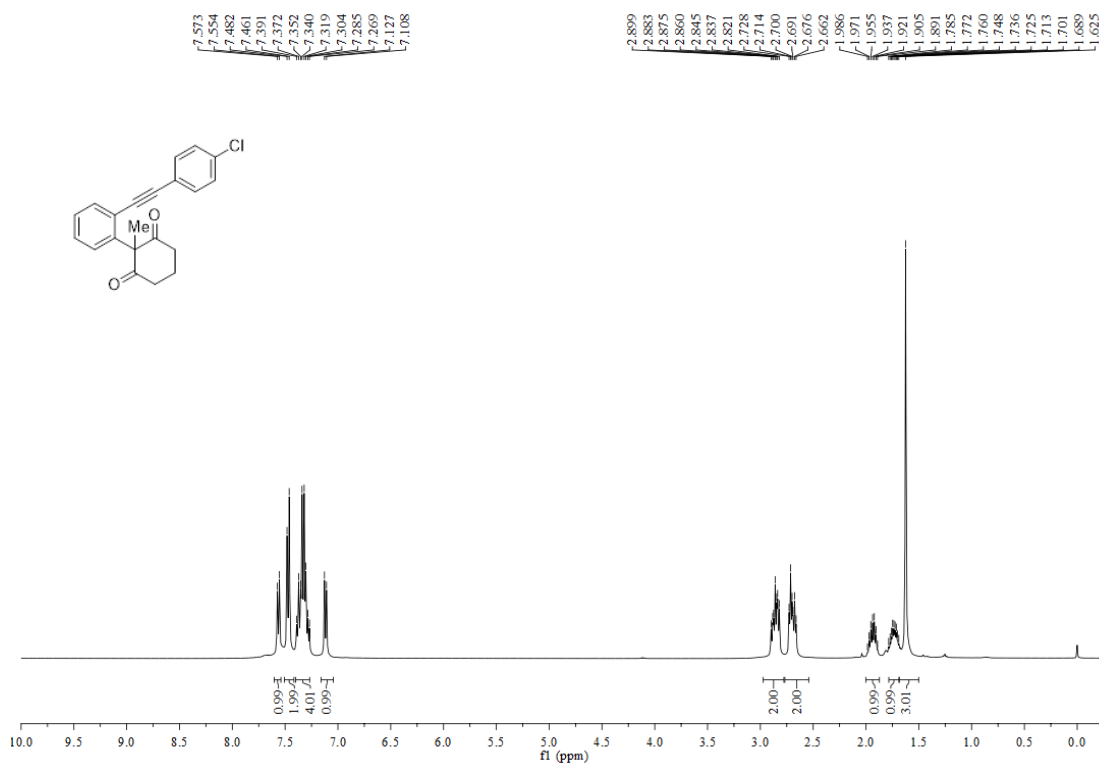

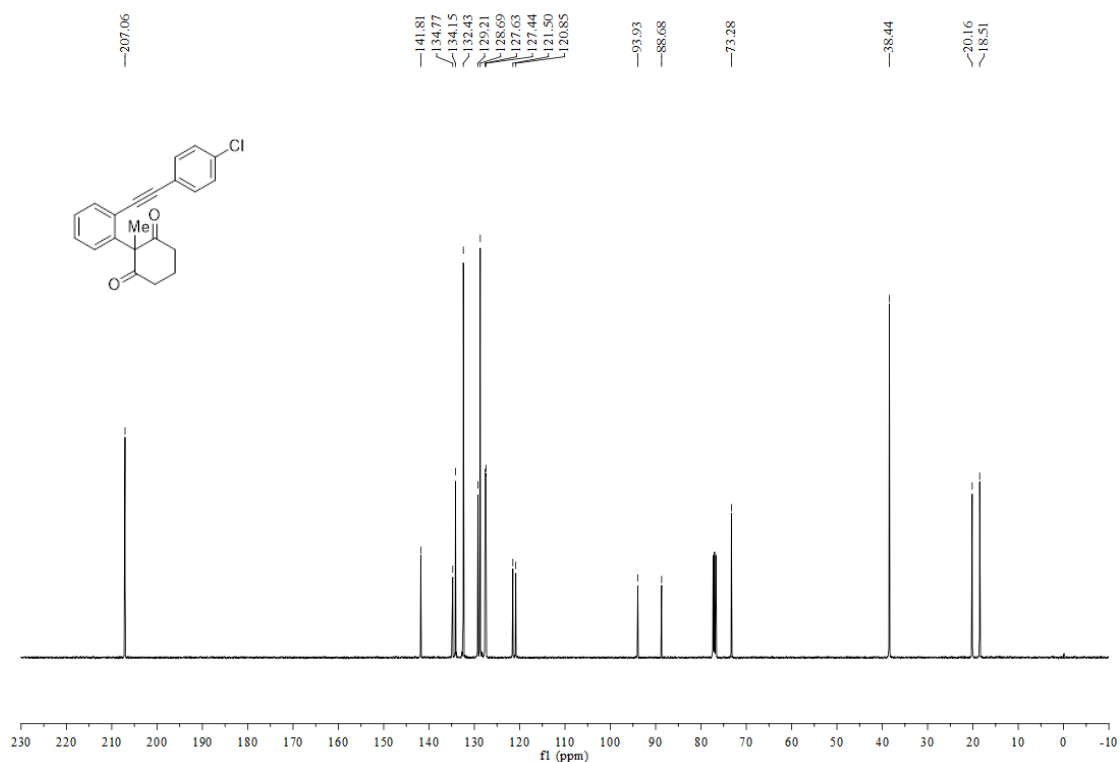

**2-Methyl-2-(2-(p-tolylolethynyl)phenyl)cyclohexane-1,3-dione (1am)**

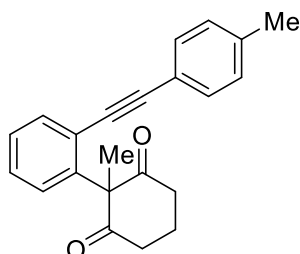

Purified by chromatography on silica gel, eluting with ethyl acetate/petroleum ether 1:5 (v/v); yellow solid, Mp = 156-157 °C; 76% yield (for the last step);  $^1\text{H}$  NMR (400 MHz,  $\text{CDCl}_3$ )  $\delta$  7.56 (d,  $J$  = 7.2 Hz, 1H), 7.42 (d,  $J$  = 8.0 Hz, 2H), 7.36 (t,  $J$  = 7.2 Hz, 1H), 7.30 (t,  $J$  = 7.2 Hz, 1H), 7.15 (t,  $J$  = 8.4 Hz, 3H), 2.91-2.83 (m, 2H), 2.75-2.68 (m, 2H), 2.36 (s, 3H), 2.02-1.92 (m, 1H), 1.81-1.72 (m, 1H), 1.64 (s, 3H).  $^{13}\text{C}$  NMR (100 MHz,  $\text{CDCl}_3$ )  $\delta$  207.4, 141.8, 139.0, 134.1, 131.2, 129.2, 128.8, 127.6, 127.4, 122.2, 119.4, 95.5, 87.5, 72.9, 38.4, 21.5, 20.5, 18.5. HRMS  $m/z$  (ESI $^+$ ): Calculated for  $\text{C}_{22}\text{H}_{20}\text{O}_2\text{Na}^+$  ( $[\text{M}+\text{Na}]^+$ ) 339.1356, found 339.1357.

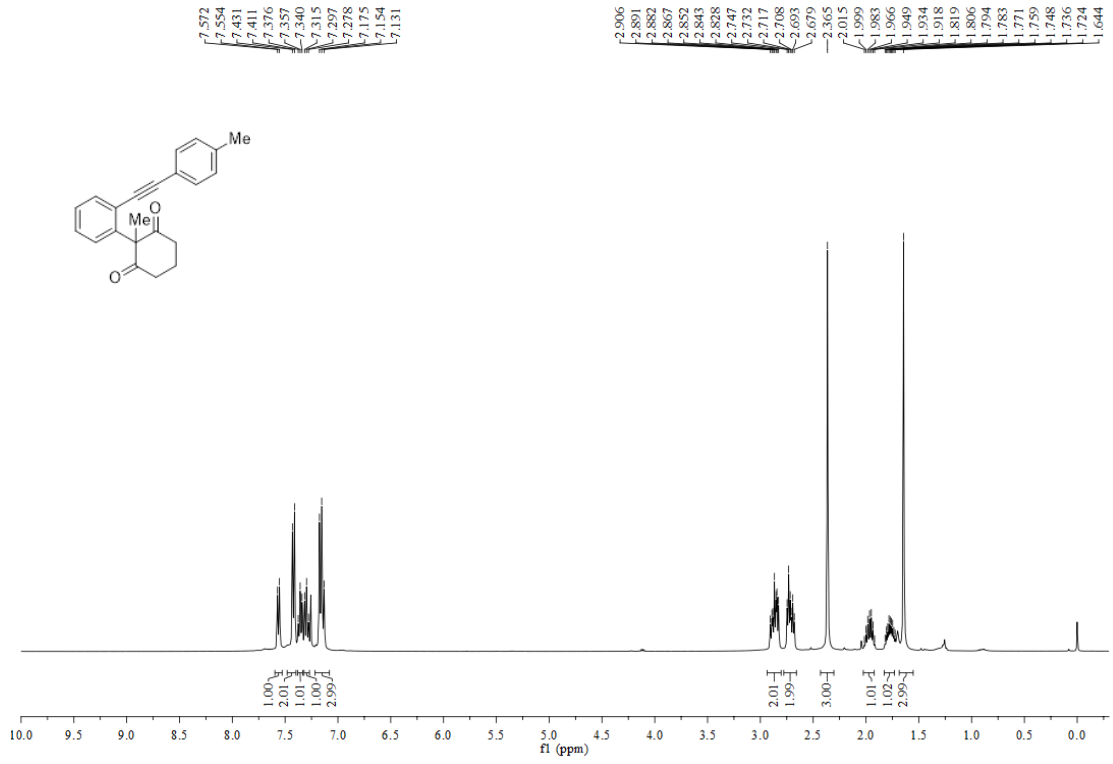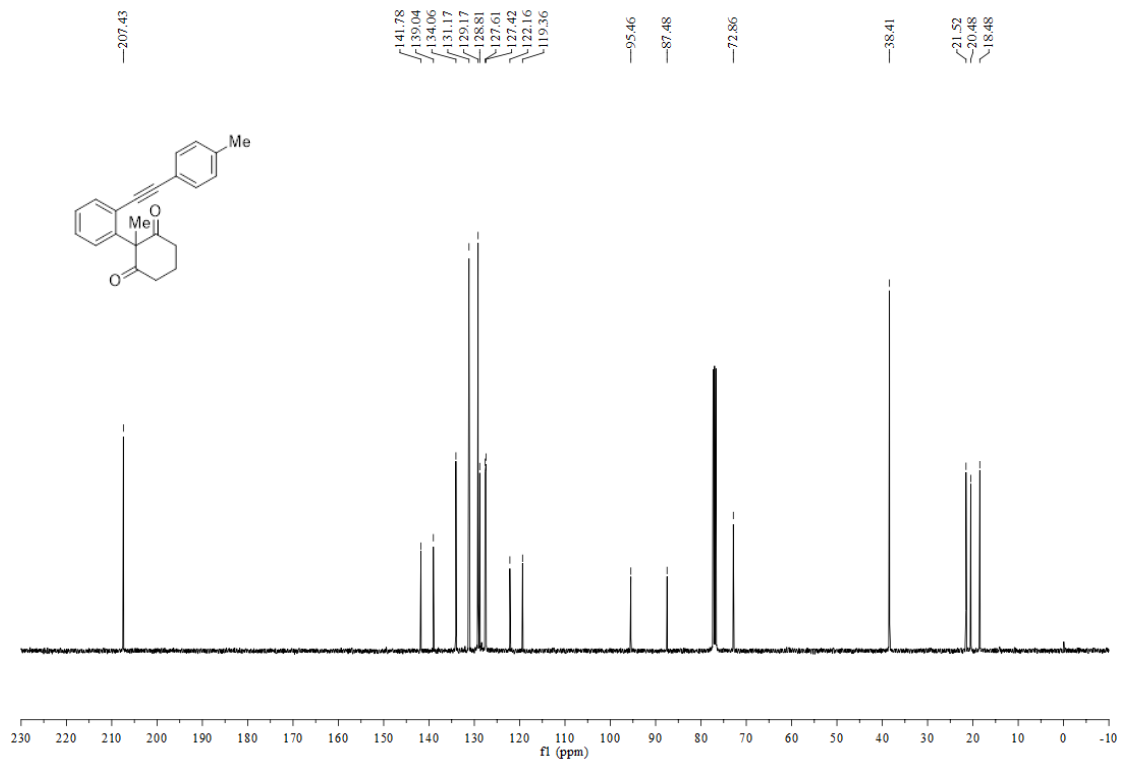

**2-Methyl-2-(2-(*o*-tolylethynyl)phenyl)cyclohexane-1,3-dione (1an)**

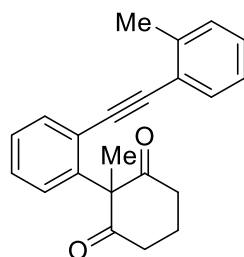

Purified by chromatography on silica gel, eluting with ethyl acetate/petroleum ether 1:5 (v/v); yellow solid, Mp = 141-142 °C; 70% yield (for the last step);  $^1\text{H}$  NMR (500 MHz,  $\text{CDCl}_3$ )  $\delta$  7.58 (d,  $J = 7.5$  Hz, 1H), 7.51 (d,  $J = 7.5$  Hz, 1H), 7.36 (t,  $J = 7.5$  Hz, 1H), 7.30 (t,  $J = 7.5$  Hz, 1H), 7.26-7.20 (m, 2H), 7.18-7.15 (m, 2H), 2.88-2.82 (m, 2H), 2.73-2.68 (m, 2H), 2.46 (s, 3H), 1.96-1.90 (m, 1H), 1.80-1.72 (m, 1H), 1.65 (s, 3H).  $^{13}\text{C}$  NMR (125 MHz,  $\text{CDCl}_3$ )  $\delta$  207.2, 141.6, 140.4, 134.2, 131.5, 129.5, 128.9, 128.8, 127.7, 127.4, 125.7, 122.3, 122.2, 94.3, 91.7, 72.9, 38.4, 20.6, 20.5, 18.4. HRMS  $m/z$  (ESI $^+$ ): Calculated for  $\text{C}_{22}\text{H}_{20}\text{O}_2\text{Na}^+$  ( $[\text{M}+\text{Na}]^+$ ) 339.13555, found 339.13577.

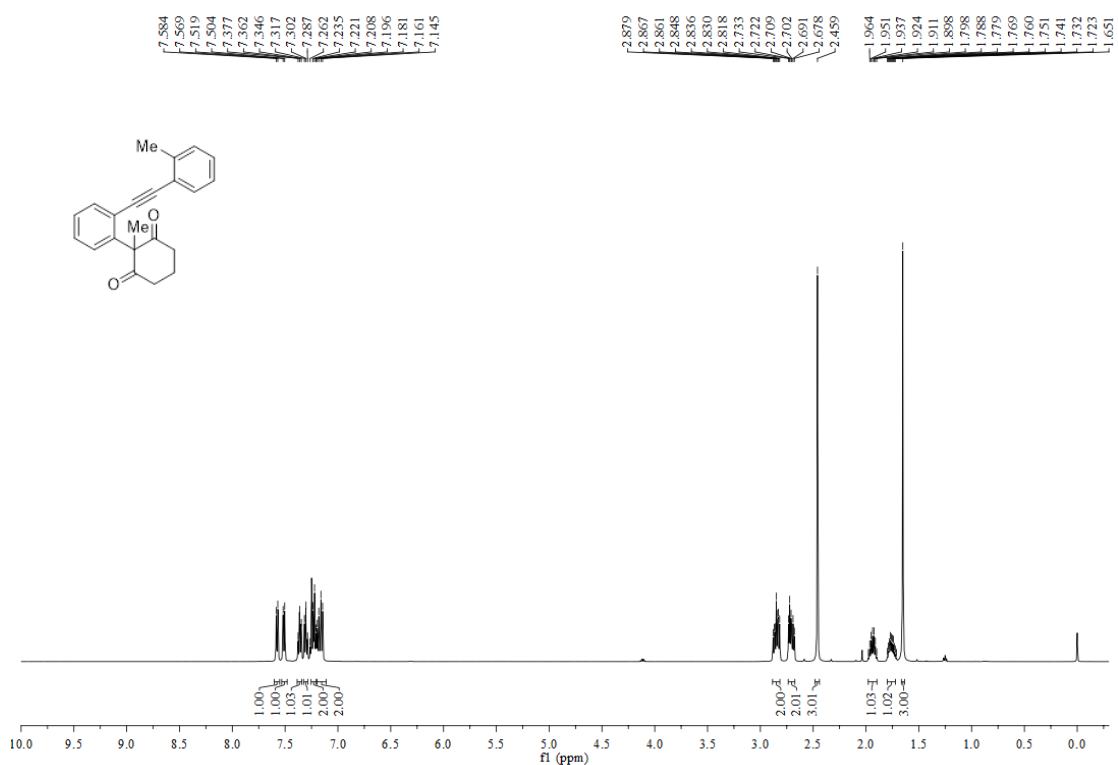

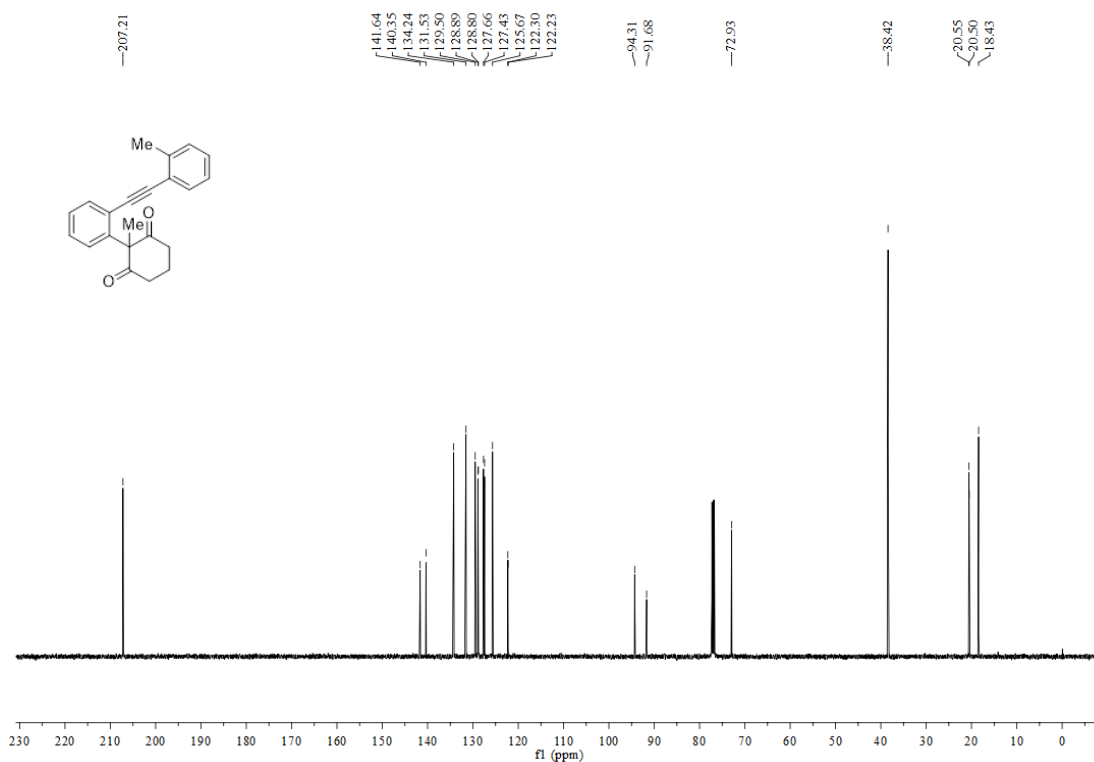

**2-Methyl-2-(2-(phenylethynyl)benzyl)cyclopentane-1,3-dione (1ao)**

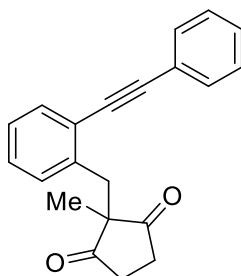

Purified by chromatography on silica gel, eluting with ethyl acetate/petroleum ether 1:5 (v/v); yellow solid, Mp = 79-80 °C; 89% yield (for the last step); <sup>1</sup>H NMR (500 MHz, CDCl<sub>3</sub>) δ 7.63 (d, *J* = 7.0 Hz, 2H), 7.51-7.49 (m, 1H), 7.39-7.35 (m, 3H), 7.24-7.22 (m, 1H), 7.13-7.12 (m, 1H), 3.22 (s, 2H), 2.60-2.45 (m, 4H), 1.21 (s, 3H). <sup>13</sup>C NMR (125 MHz, CDCl<sub>3</sub>) δ 215.8, 137.1, 132.5, 131.6, 130.4, 128.43, 128.38, 128.2, 127.3, 123.8, 123.1, 93.8, 87.6, 57.6, 40.7, 35.6, 18.2. HRMS *m/z* (ESI<sup>+</sup>): Calculated for C<sub>21</sub>H<sub>19</sub>O<sub>2</sub><sup>+</sup> ([M+H]<sup>+</sup>) 303.1380, found 303.1383.

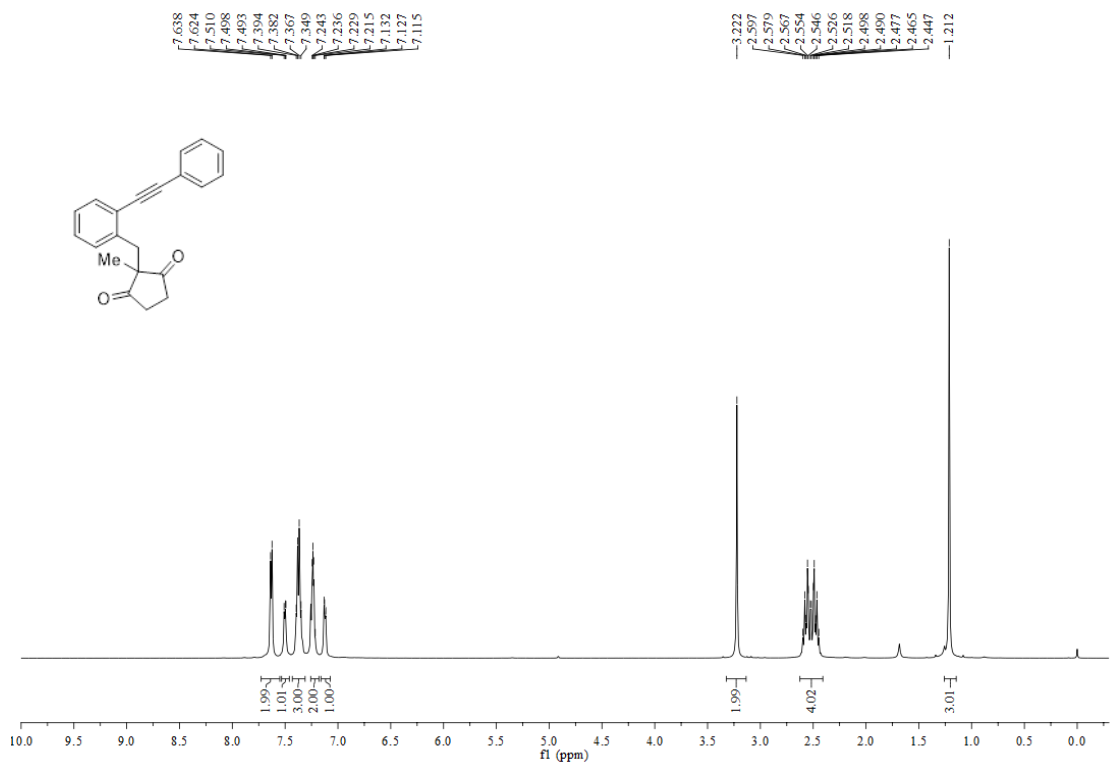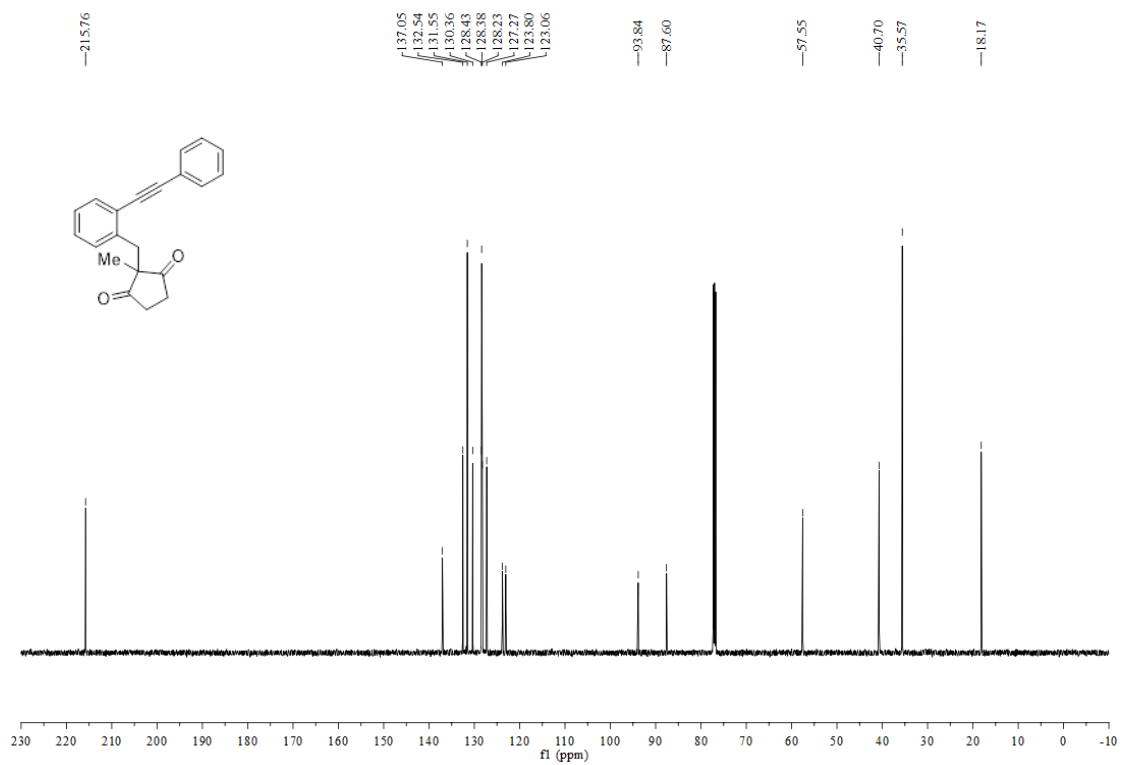



**2-Methyl-2-(2-(3-methylbut-3-en-1-yn-1-yl)phenyl)cyclopentane-1,3-dione (1ap)**

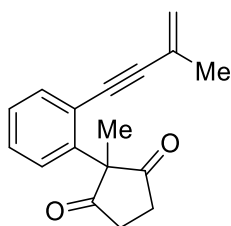

Purified by chromatography on silica gel, eluting with ethyl acetate/petroleum ether 1:5 (v/v); yellow solid, Mp = 160-161 °C; 39% yield (for the last step);  $^1\text{H}$  NMR (600 MHz,  $\text{CDCl}_3$ )  $\delta$  7.46 (d,  $J = 7.2$  Hz, 1H), 7.41-7.38 (m, 2H), 7.31-7.28 (m, 1H), 5.35 (d,  $J = 1.2$  Hz, 2H), 3.13-3.03 (m, 2H), 2.91-2.82 (m, 2H), 1.95 (t,  $J = 1.2$  Hz, 3H), 1.59 (s, 3H).  $^{13}\text{C}$  NMR (150 MHz,  $\text{CDCl}_3$ )  $\delta$  213.1, 140.0, 133.0, 128.8, 128.0, 127.8, 126.3, 123.0, 122.0, 96.2, 88.9, 62.5, 35.4, 23.3, 19.8. HRMS  $m/z$  (ESI $^+$ ): Calculated for  $\text{C}_{17}\text{H}_{16}\text{O}_2\text{Na}^+$  ( $[\text{M}+\text{Na}]^+$ ) 275.1043, found 275.1043.

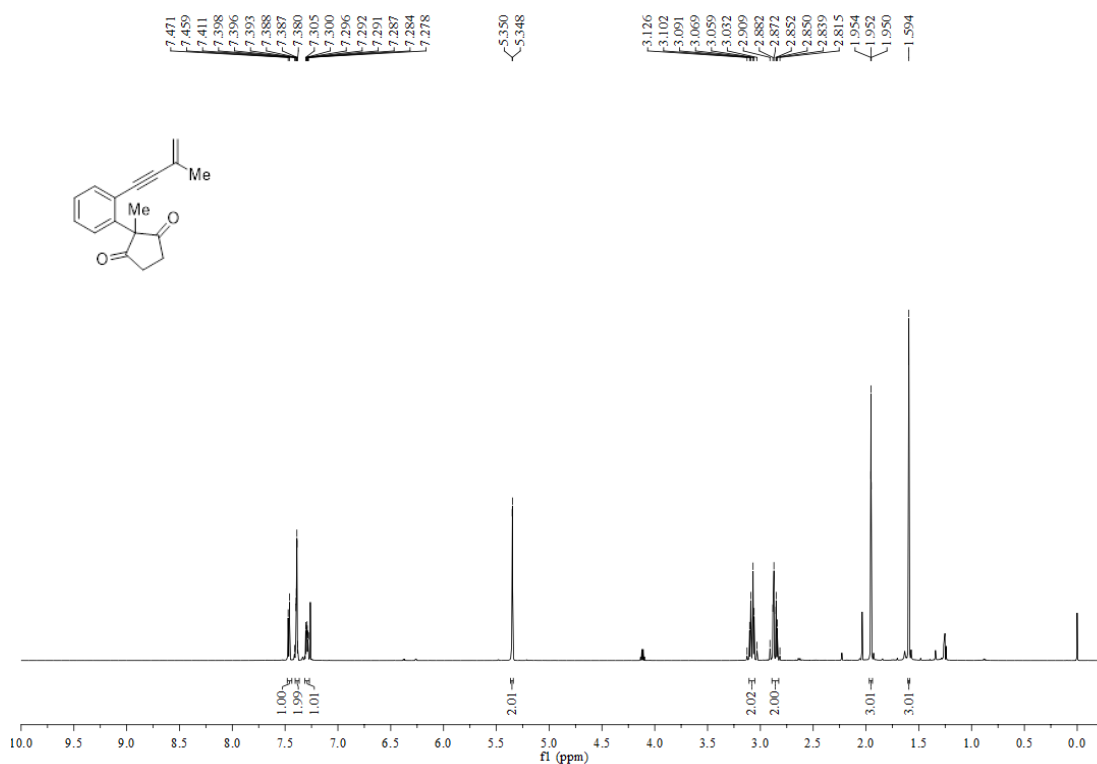

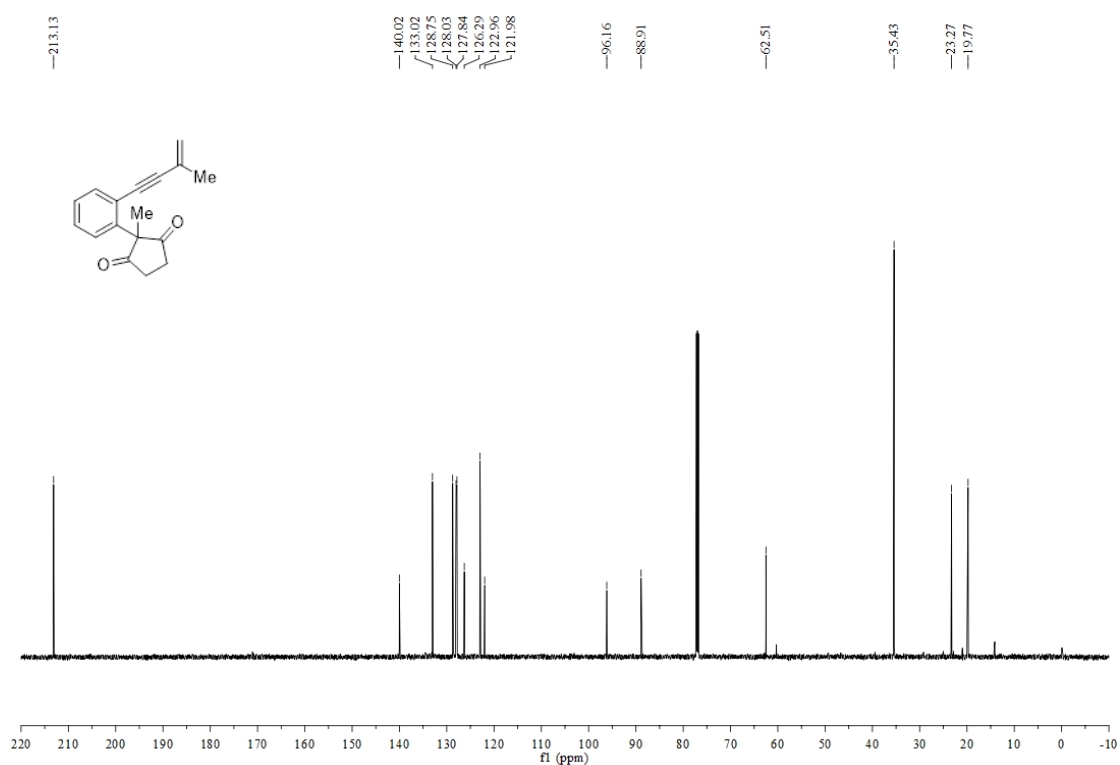

#### 4. General procedure for enantioselective Co-catalyzed reductive cyclization

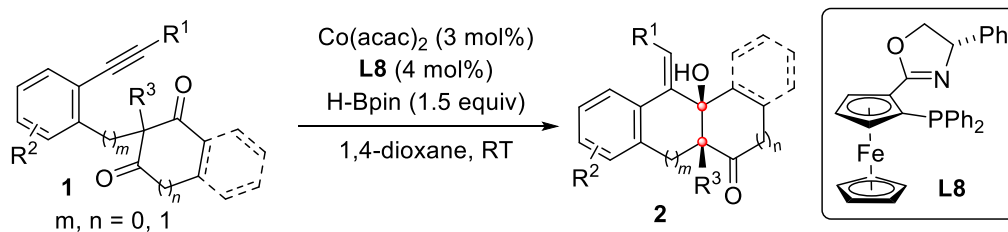

To a dried Schlenk tube were charged with  $\text{Co}(\text{acac})_2$  (3 mol%, 1.5 mg), **L8** (4 mol%, 4.2 mg), and **1** (0.2 mmol) under  $\text{N}_2$  atmosphere. 1,4-Dioxane (1.0 mL) and HBpin (1.5 equiv, 44  $\mu\text{L}$ ) was then introduced via syringe. The resulting mixture was stirred at room temperature until **1** was completely consumed (monitored by TLC). The reaction mixture was then concentrated under reduced pressure and the crude was purified by flash chromatography on silica gel, eluting with ethyl acetate/petroleum ether (v/v = 1/5), to afford product **2**.

**(3aR, 8aR)-8-((E)-Benzylidene)-8a-hydroxy-3a-methyl-1,3a,8,8a tetrahydrocyclopenta[ajinden-3(2H)-one (2a)**

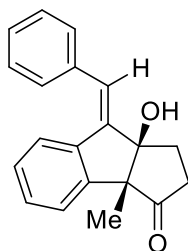

Purified by chromatography on silica gel, eluting with ethyl acetate/petroleum ether 1:5 (v/v); white solid, Mp = 110-101 °C; 55 mg, 85% yield;  $[\alpha]_D^{20} = -214.7$  ( $c$  1.0,  $\text{CH}_2\text{Cl}_2$ ), 99% ee [Phenomenex Lux 5u Amylose-2 column (25 cm  $\times$  0.46 cm ID),  $n$ -hexane/ $i$ -PrOH = 80/20, 0.7 mL/min, 254 nm;  $t_{\text{minor}} = 6.6$  min,  $t_{\text{major}} = 7.7$  min];  $^1\text{H}$  NMR (500 MHz,  $\text{CDCl}_3$ )  $\delta$  7.43 (d,  $J = 7.5$  Hz, 2H), 7.38-7.28 (m, 5H), 7.20 (t,  $J = 7.5$  Hz, 1H), 7.04 (t,  $J = 7.5$  Hz, 1H), 6.93 (s, 1H), 2.64-2.56 (m, 1H), 2.36-2.24 (m, 2H), 2.19 (s, 1H), 2.13-2.07 (m, 1H), 1.36 (s, 3H).  $^{13}\text{C}$  NMR (125 MHz,  $\text{CDCl}_3$ )  $\delta$  217.4, 146.1, 144.9, 136.8, 136.0, 129.3, 128.5, 128.3, 127.7, 127.5, 124.9, 124.3, 124.1, 89.0, 62.6, 37.0, 34.2, 17.7. HRMS  $m/z$  (ESI $^+$ ): Calculated for  $\text{C}_{20}\text{H}_{18}\text{NaO}_2^+$  ( $[\text{M}+\text{Na}]^+$ ) 313.1199, found 313.1198.

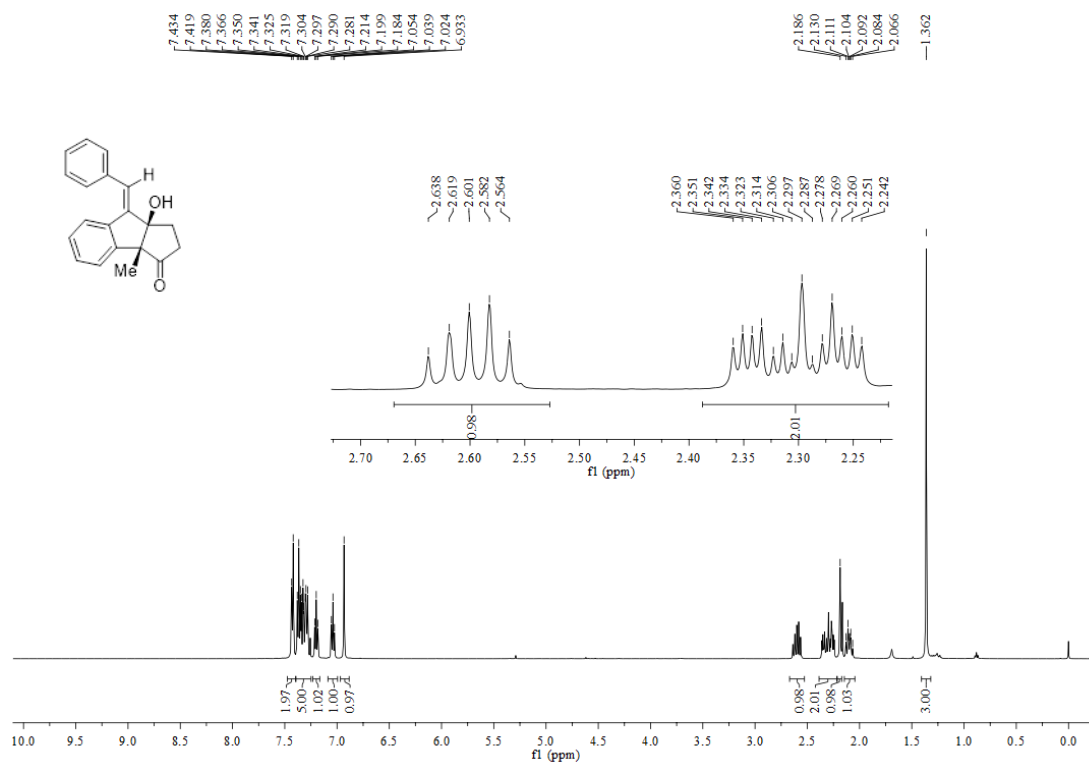

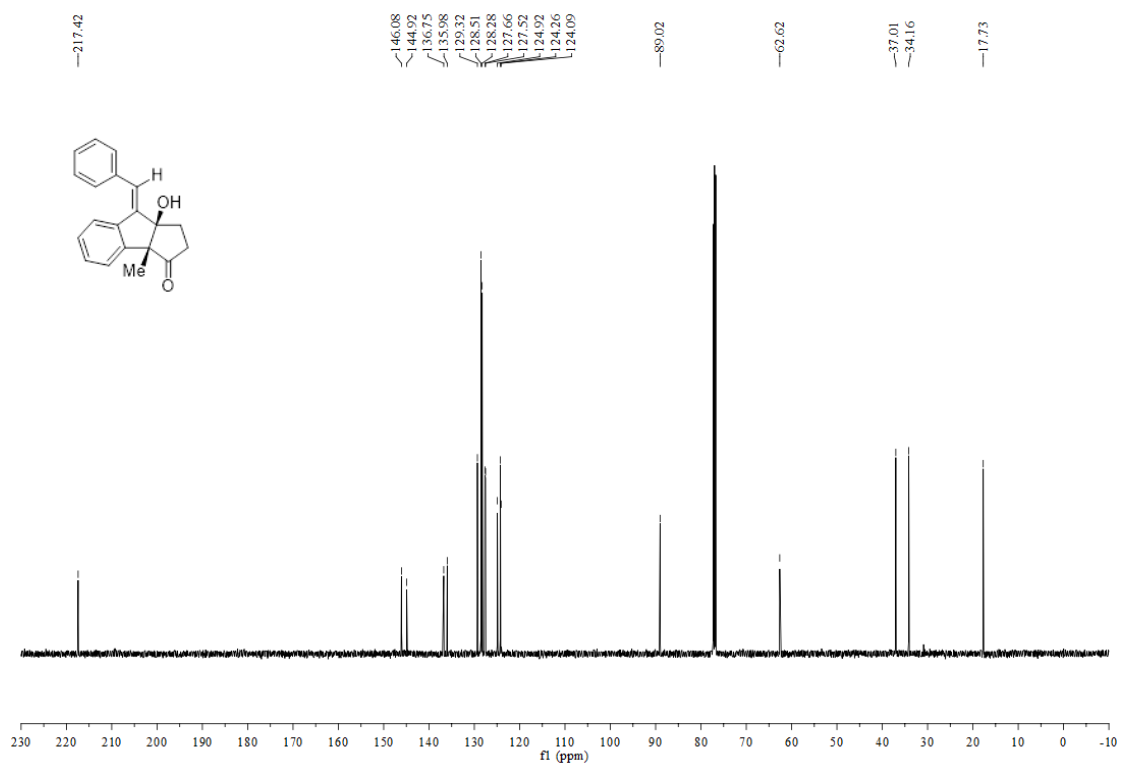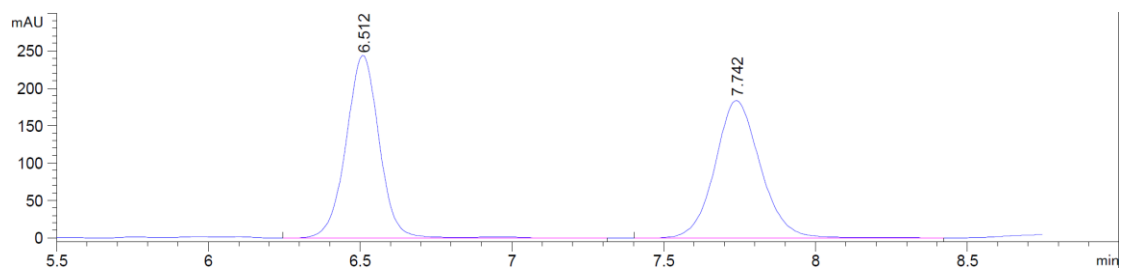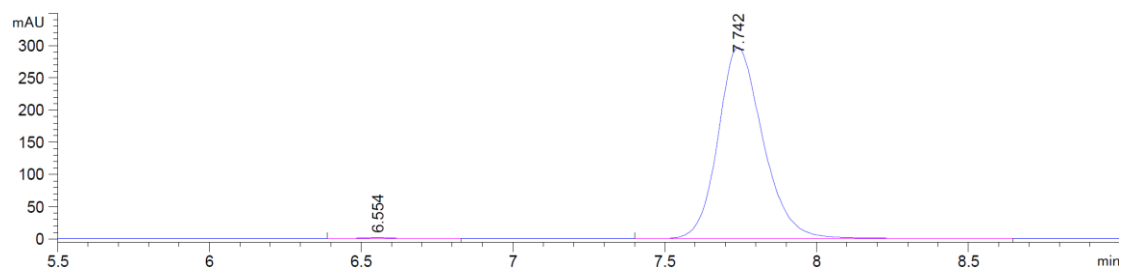

Signal 1: DAD1 A, Sig=254,4 Ref=360,100

| Peak # | RetTime [min] | Type | Width [min] | Area [mAU*s] | Height [mAU] | Area %  |
|--------|---------------|------|-------------|--------------|--------------|---------|
| 1      | 6.554         | BB   | 0.1191      | 11.50782     | 1.50630      | 0.3752  |
| 2      | 7.742         | BB   | 0.1559      | 3055.56152   | 297.41013    | 99.6248 |

**(3*aR*,8*aR*)-8-Hydroxy-3*a*-methyl-8-((*E*)-4-methylbenzylidene)-1,3*a*,8,8*a*-tetrahydrocyclopenta[*a*]inden-3(2*H*)-one (2*b*)**

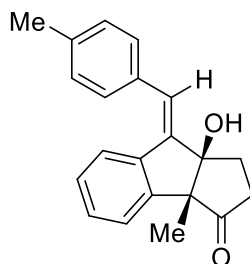

Purified by chromatography on silica gel, eluting with ethyl acetate/petroleum ether 1:5 (v/v); white solid, Mp = 114-115 °C; 32 mg, 52% yield;  $[\alpha]_D^{20} = -210.4$  (*c* 0.5, CH<sub>2</sub>Cl<sub>2</sub>), 93% ee [Phenomenex Lux 5u Amylose-2 column (25 cm × 0.46 cm ID), *n*-hexane/*i*-PrOH = 85/15, 0.7 mL/min, 254 nm;  $t_{\text{minor}} = 7.1$  min,  $t_{\text{major}} = 8.9$  min]; <sup>1</sup>H NMR (500 MHz, CDCl<sub>3</sub>) δ 7.36-7.32 (m, 4H), 7.22-7.16 (m, 3H), 7.07-7.03 (m, 1H), 6.90 (s, 1H), 2.63-2.56 (m, 1H), 2.39 (s, 3H), 2.36-2.23 (m, 2H), 2.13-2.04 (m, 2H), 1.36 (s, 3H). <sup>13</sup>C NMR (125 MHz, CDCl<sub>3</sub>) δ 217.4, 145.5, 144.9, 137.4, 136.2, 133.7, 129.2, 128.2, 127.7, 124.9, 124.3, 124.2, 89.1, 62.6, 37.0, 34.2, 21.3, 17.7. HRMS *m/z* (ESI<sup>+</sup>): Calculated for C<sub>21</sub>H<sub>20</sub>O<sub>2</sub>Na<sup>+</sup> ([M+Na]<sup>+</sup>) 327.1356, found 327.1355.

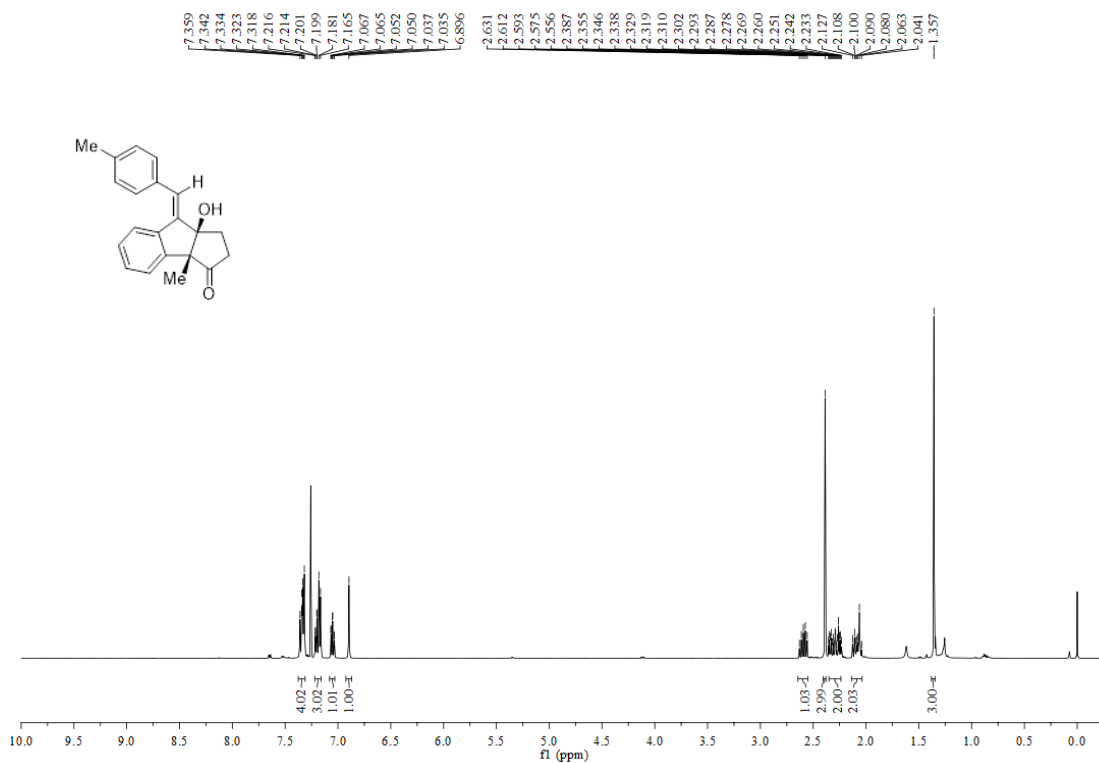

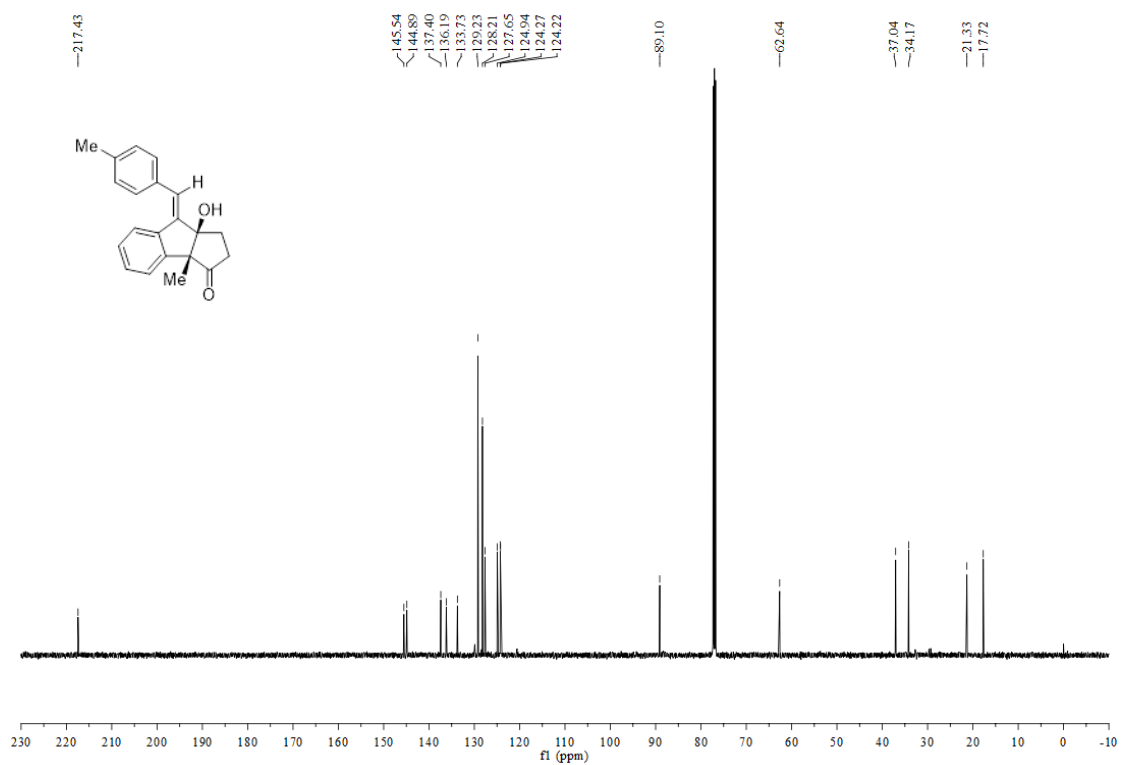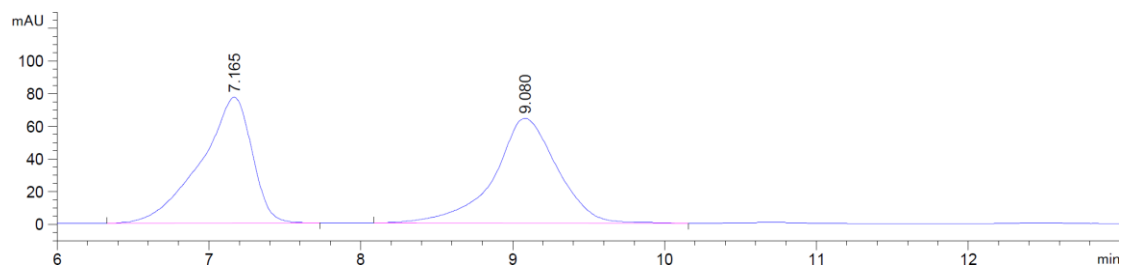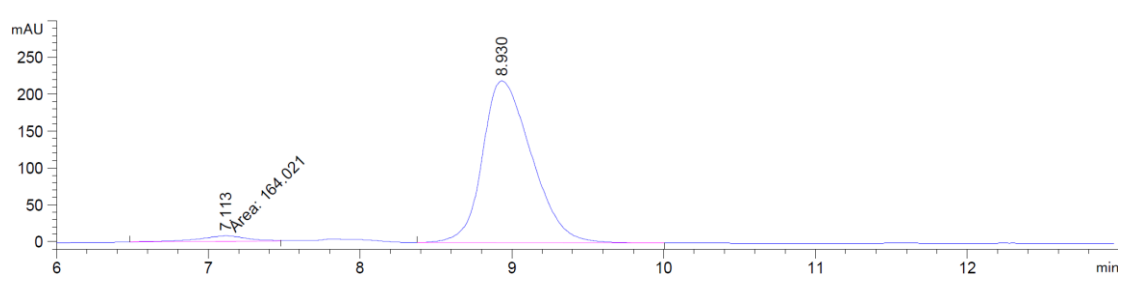

Signal 1: DAD1 A, Sig=254,4 Ref=360,100

| Peak # | RetTime [min] | Type | Width [min] | Area [mAU*s] | Height [mAU] | Area %  |
|--------|---------------|------|-------------|--------------|--------------|---------|
| 1      | 7.113         | MM   | 0.3688      | 164.02098    | 7.41256      | 3.2176  |
| 2      | 8.930         | BB   | 0.3480      | 4933.67285   | 219.72328    | 96.7824 |

**(3*aR*,8*aR*)-8a-Hydroxy-8-((*E*)-4-methoxybenzylidene)-3*a*-methyl-1,3*a*,8,8*a*-tetrahydrocyclopenta[*a*]inden-3(2*H*)-one (2*c*)**

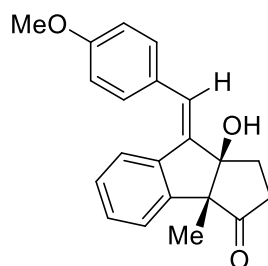

Purified by chromatography on silica gel, eluting with ethyl acetate/petroleum ether 1:5 (v/v); brown oil; 42 mg, 65% yield;  $[\alpha]_D^{20} = -242.3$  (*c* 0.5, CH<sub>2</sub>Cl<sub>2</sub>), 99% ee [Phenomenex Lux 5u Amylose-2 column (25 cm × 0.46 cm ID), *n*-hexane/*i*-PrOH = 90/10, 0.7 mL/min, 280 nm;  $t_{\text{minor}} = 12.8$  min,  $t_{\text{major}} = 19.3$  min]; <sup>1</sup>H NMR (500 MHz, CDCl<sub>3</sub>)  $\delta$  7.37 (dd, *J* = 8.0, 4.0 Hz, 3H), 7.32 (d, *J* = 7.5 Hz, 1H), 7.20-7.17 (m, 1H), 7.07-7.04 (m, 1H), 6.91-6.87 (m, 3H), 3.84 (s, 3H), 2.62-2.54 (m, 1H), 2.34-2.22 (m, 3H), 2.12-2.03 (m, 1H), 1.35 (s, 3H). <sup>13</sup>C NMR (125 MHz, CDCl<sub>3</sub>)  $\delta$  217.5, 159.1, 145.0, 144.9, 136.3, 129.6, 129.1, 129.0, 127.7, 124.8, 124.3, 123.9, 113.9, 89.1, 62.7, 55.3, 37.0, 34.2, 17.7. Calculated for C<sub>21</sub>H<sub>20</sub>O<sub>3</sub><sup>+</sup> ( $[M]^+$ ) 320.1407, found 320.1407.

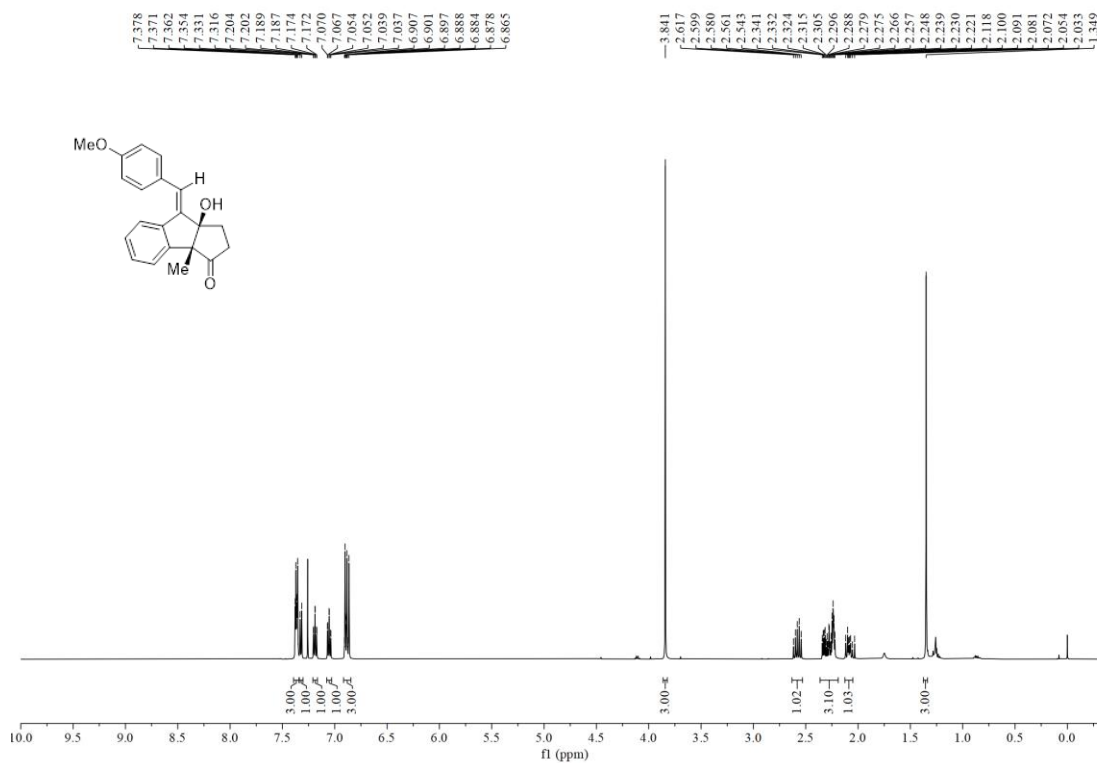

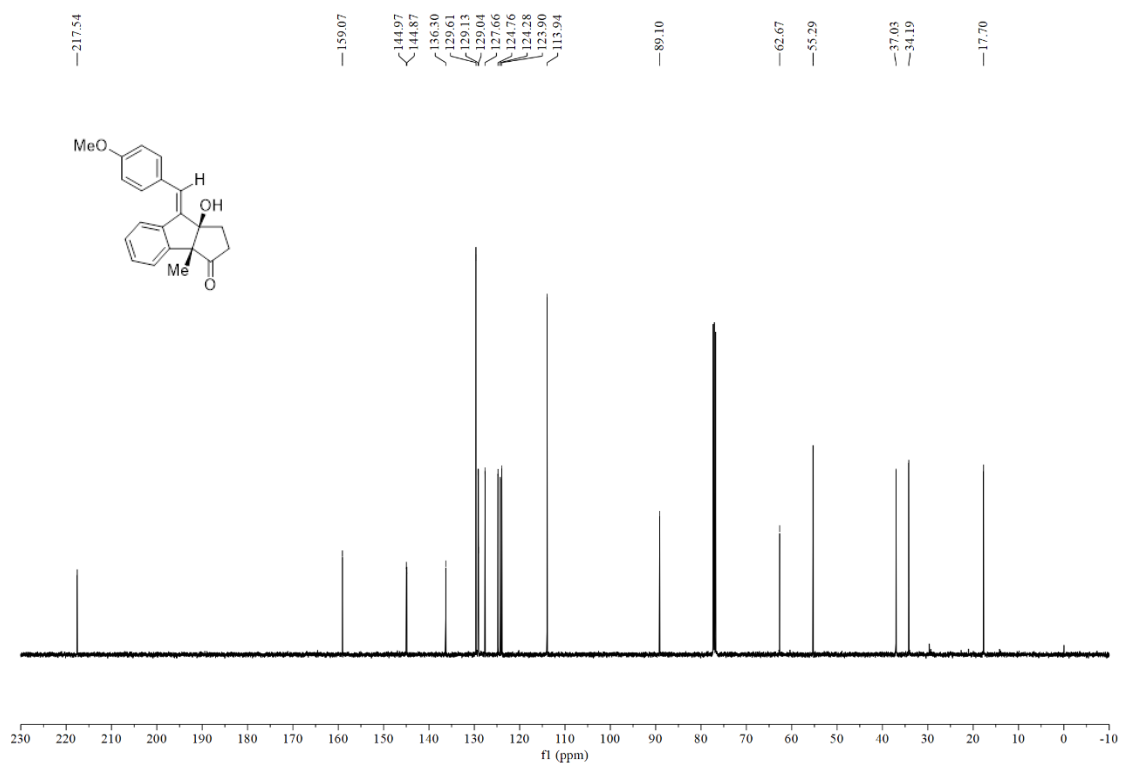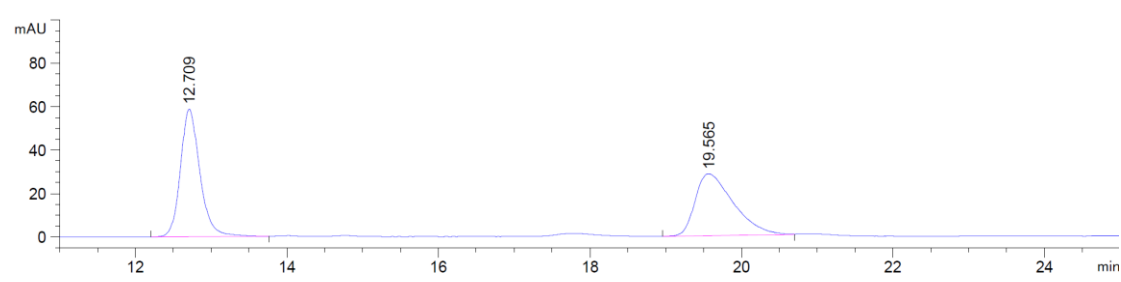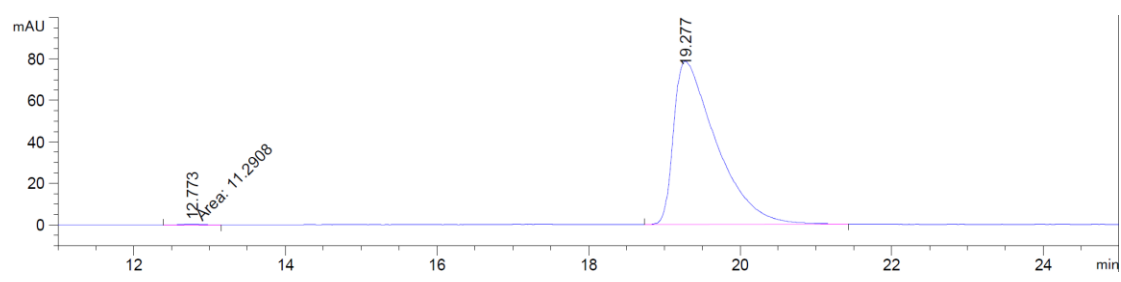

Signal 7: DAD1 G, Sig=280,4 Ref=360,100

| Peak # | RetTime [min] | Type | Width [min] | Area [mAU*s] | Height [mAU] | Area %  |
|--------|---------------|------|-------------|--------------|--------------|---------|
| 1      | 12.773        | MM   | 0.3451      | 11.29077     | 5.45229e-1   | 0.3659  |
| 2      | 19.277        | BB   | 0.5626      | 3074.20117   | 78.55772     | 99.6341 |



**(3*aR*,8*aR*)-8-((*E*)-4-Chlorobenzylidene)-8*a*-hydroxy-3*a*-methyl-1,3*a*,8,8*a*-tetrahydro-cyclopenta[*a*]inden-3(2*H*)-one (2*d*)**

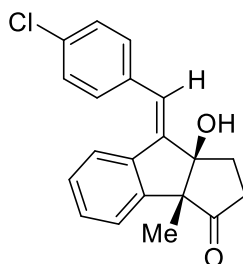

Purified by chromatography on silica gel, eluting with ethyl acetate/petroleum ether 1:5 (v/v); white solid, Mp = 95-96 °C; 48 mg, 75% yield;  $[\alpha]_D^{20} = -246.35$  ( $c$  0.5,  $\text{CH}_2\text{Cl}_2$ ), 98% ee [Phenomenex Lux 5u Amylose-2 column (25 cm  $\times$  0.46 cm ID),  $n$ -hexane/ $i$ -PrOH = 90/10, 0.7 mL/min, 254 nm;  $t_{\text{minor}} = 8.9$  min,  $t_{\text{major}} = 10.6$  min];  $^1\text{H}$  NMR (500 MHz,  $\text{CDCl}_3$ )  $\delta$  7.38-7.35 (m, 2H), 7.34-7.33 (m, 3H), 7.27 (d,  $J = 8.0$  Hz, 1H), 7.24-7.20 (m, 1H), 7.09-7.05 (m, 1H), 6.85 (s, 1H), 2.64-2.57 (m, 1H), 2.36-2.23 (m, 2H), 2.10-2.06 (m, 1H), 1.95 (s, 1H), 1.36 (s, 3H).  $^{13}\text{C}$  NMR (125 MHz,  $\text{CDCl}_3$ )  $\delta$  217.2, 146.9, 145.1, 135.7, 135.3, 133.3, 129.7, 129.6, 128.8, 127.8, 124.9, 124.4, 122.7, 89.1, 62.7, 37.0, 34.2, 17.8. HRMS  $m/z$  (ESI $^+$ ): Calculated for  $\text{C}_{20}\text{H}_{17}\text{ClO}_2\text{Na}^+$  ( $[\text{M}+\text{Na}]^+$ ) 347.0809, found 347.0803.

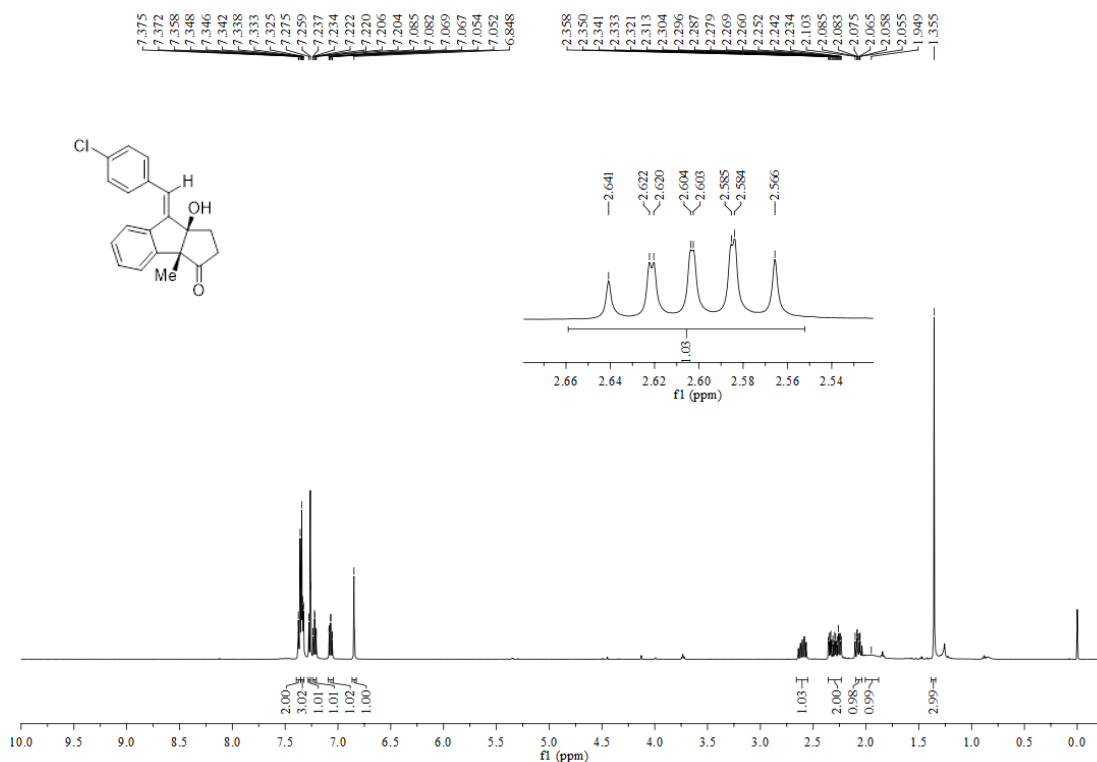

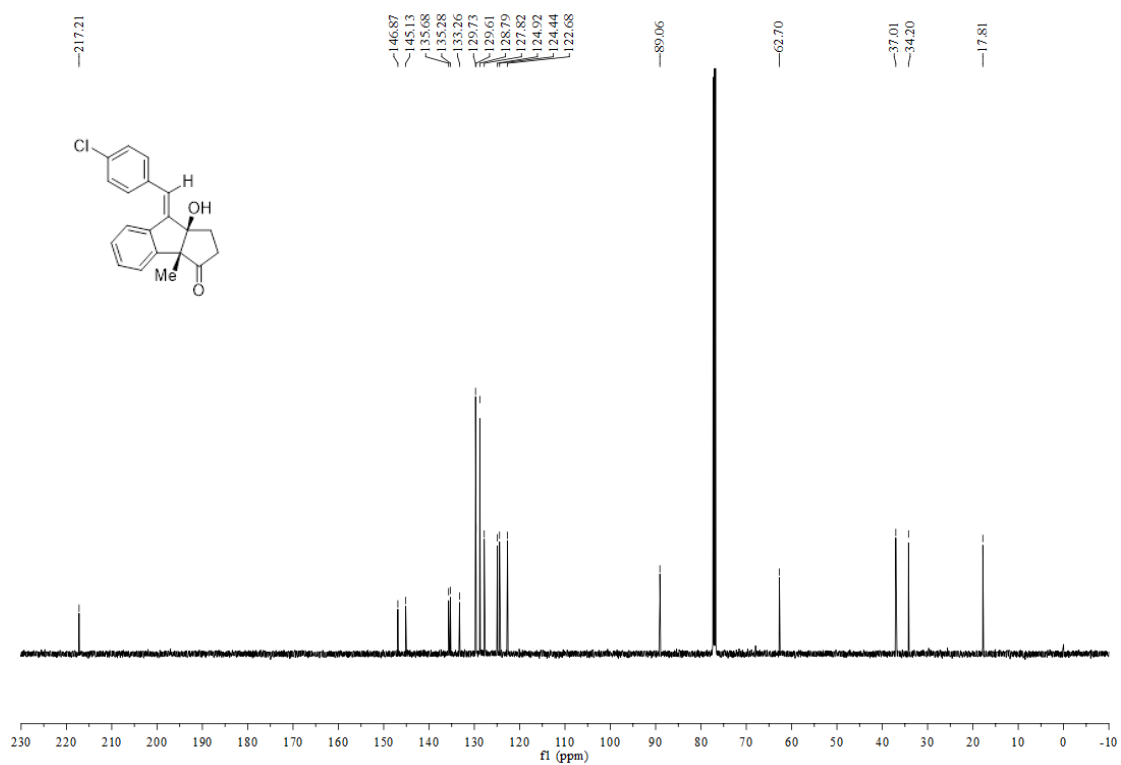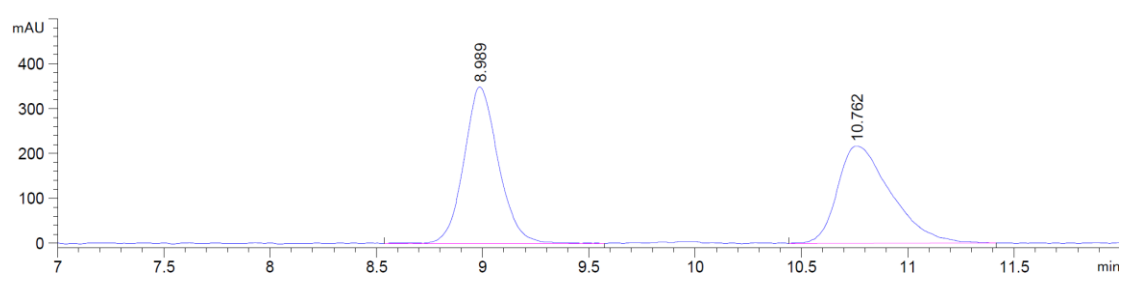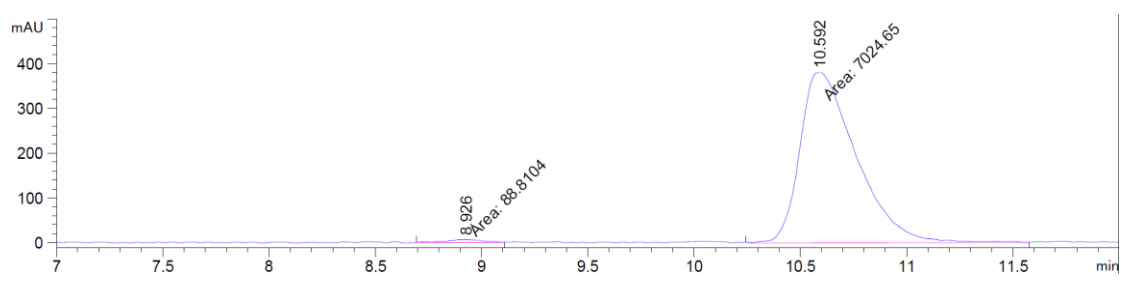

Signal 1: DAD1 A, Sig=254,4 Ref=360,100

| Peak # | RetTime [min] | Type | Width [min] | Area [mAU*s] | Height [mAU] | Area %  |
|--------|---------------|------|-------------|--------------|--------------|---------|
| 1      | 8.926         | MM   | 0.2284      | 88.81040     | 6.47923      | 1.2485  |
| 2      | 10.592        | MM   | 0.3076      | 7024.65186   | 380.59192    | 98.7515 |

**(3*aR*,8*aR*)-8-((*E*)-4-Fluorobenzylidene)-8*a*-hydroxy-3*a*-methyl-1,3*a*,8,8*a*-tetrahydro-cyclopenta[*a*]inden-3(2*H*)-one (2*e*)**

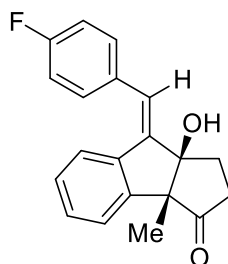

Purified by chromatography on silica gel, eluting with ethyl acetate/petroleum ether 1:5 (v/v); white solid, Mp = 134-135 °C; 43 mg, 70% yield;  $[\alpha]_D^{20} = -180.0$  ( $c$  1.0, CH<sub>2</sub>Cl<sub>2</sub>), 96% ee [Phenomenex Lux 5u Amylose-2 column (25 cm × 0.46 cm ID), *n*-hexane/*i*-PrOH = 95/05, 0.7 mL/min, 254 nm;  $t_{\text{minor}} = 6.5$  min,  $t_{\text{major}} = 7.1$  min]; <sup>1</sup>H NMR (500 MHz, CDCl<sub>3</sub>)  $\delta$  7.39 (dd,  $J = 8.5, 5.5$  Hz, 2H), 7.34 (d,  $J = 7.5$  Hz, 1H), 7.25 (d,  $J = 8.0$  Hz, 1H), 7.23-7.19 (m, 1H), 7.07-7.04 (m, 3H), 6.87 (s, 1H), 2.64-2.56 (m, 1H), 2.35-2.24 (m, 2H), 2.21 (s, 1H), 2.11-2.04 (m, 1H), 1.36 (s, 3H). <sup>13</sup>C NMR (125 MHz, CDCl<sub>3</sub>)  $\delta$  217.3, 162.1 (d,  $J = 246.3$  Hz), 146.3, 145.0, 135.8, 132.7 (d,  $J = 3.8$  Hz), 130.0 (d,  $J = 7.5$  Hz), 129.5, 127.8, 124.8, 124.4, 122.9, 115.6 (d,  $J = 21.3$  Hz), 89.0, 62.7, 37.0, 34.2, 17.8. HRMS  $m/z$  (ESI<sup>+</sup>): Calculated for C<sub>20</sub>H<sub>17</sub>FO<sub>2</sub>Na<sup>+</sup> ([M+Na]<sup>+</sup>) 331.1105, found 331.1104.

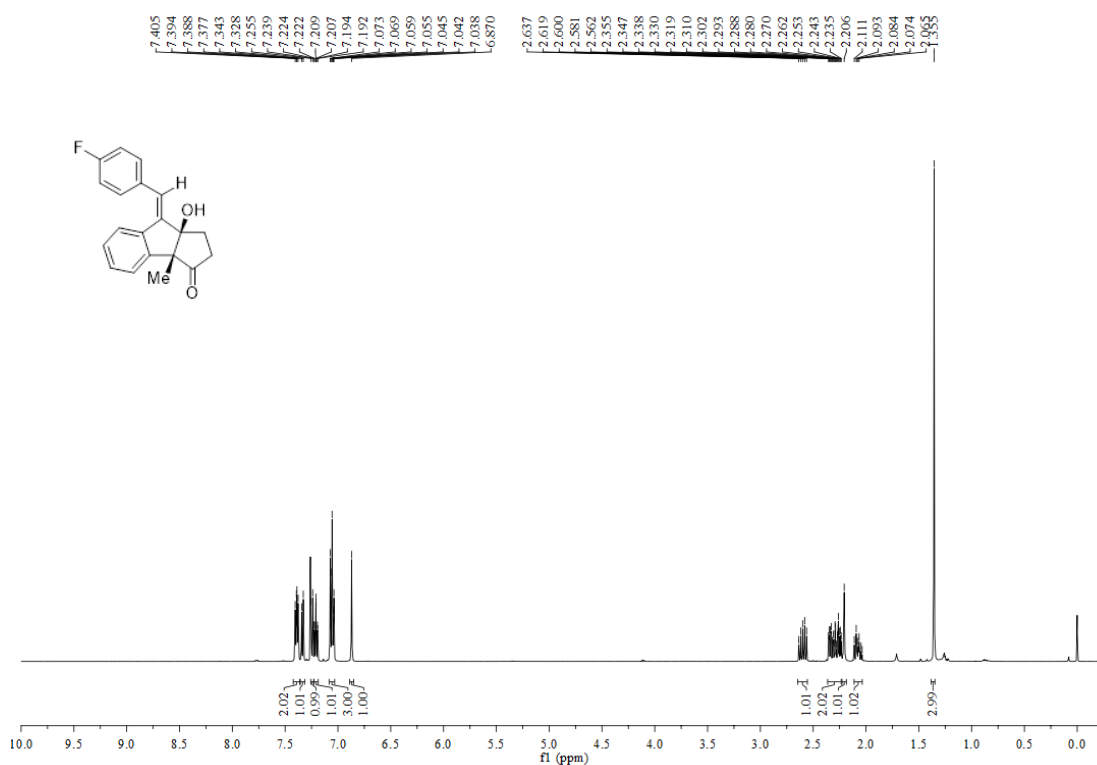



**Methyl 4-((E)-((3aR,8aR)-8a-hydroxy-3a-methyl-3-oxo-2,3,3a,8a-tetrahydrocyclopenta[a]inden-8(1H)-ylidene)methyl)benzoate (2f)**

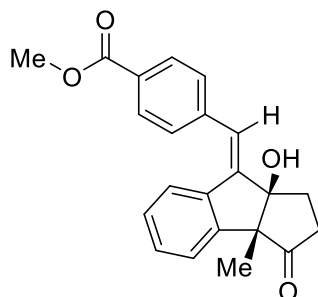

Purified by chromatography on silica gel, eluting with ethyl acetate/petroleum ether 1:5 (v/v); yellow oil; 62 mg, 89% yield;  $[\alpha]_D^{20} = -127.8$  ( $c$  0.5,  $\text{CH}_2\text{Cl}_2$ ), 97% ee [Phenomenex Lux 5u Amylose-2 column (25 cm  $\times$  0.46 cm ID),  $n$ -hexane/ $i$ -PrOH = 85/15, 0.7 mL/min, 254 nm;  $t_{\text{minor}} = 10.6$  min,  $t_{\text{major}} = 12.2$  min];  $^1\text{H}$  NMR (500 MHz,  $\text{CDCl}_3$ )  $\delta$  8.03 (d,  $J = 8.5$  Hz, 2H), 7.51 (d,  $J = 8.0$  Hz, 2H), 7.35 (d,  $J = 8.0$  Hz, 1H), 7.26-7.21 (m, 2H), 7.07-7.04 (m, 1H), 6.92 (s, 1H), 3.94 (s, 3H), 2.66-2.58 (m, 1H), 2.37-2.25 (m, 2H), 2.22 (s, 1H), 2.11-2.06 (m, 1H), 1.37 (s, 3H).  $^{13}\text{C}$  NMR (125 MHz,  $\text{CDCl}_3$ )  $\delta$  217.1, 166.9, 147.8, 145.3, 141.8, 135.5, 129.82, 129.78, 129.1, 128.4, 127.8, 125.0, 124.4, 122.8, 89.1, 62.7, 52.1, 37.0, 34.2, 17.9. HRMS  $m/z$  (ESI $^+$ ): Calculated for  $\text{C}_{22}\text{H}_{20}\text{O}_4$  ( $[\text{M}]^+$ ) 348.1356, found 348.1359.

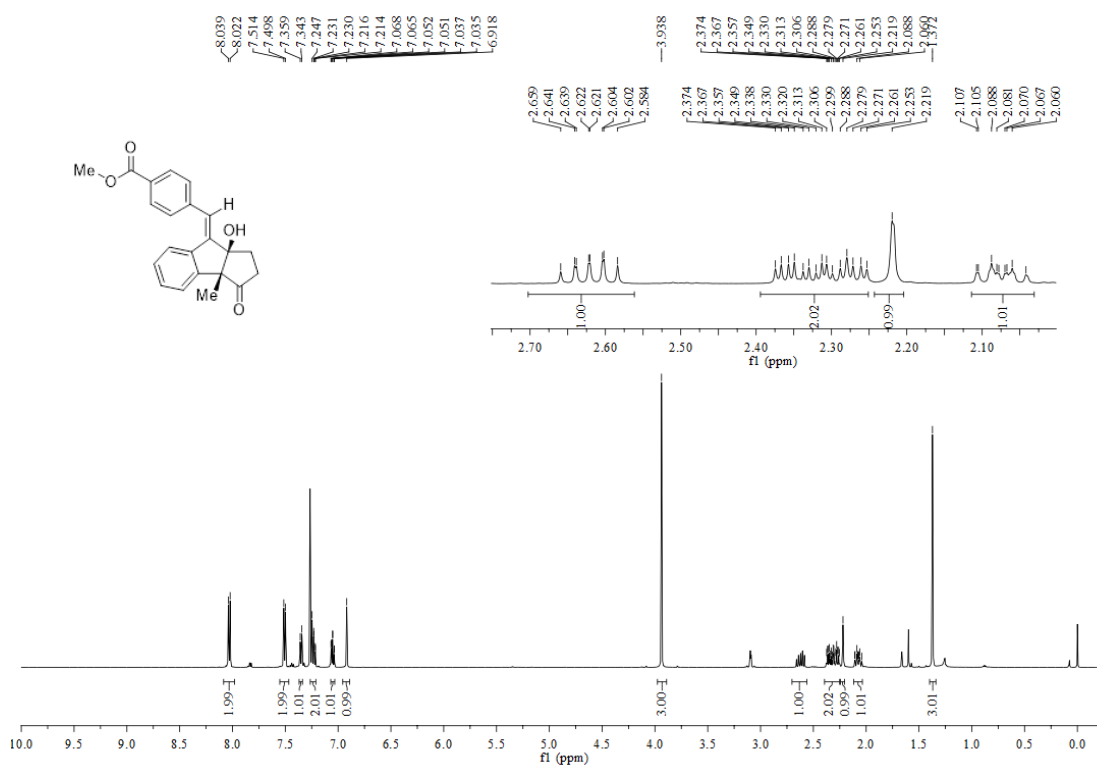

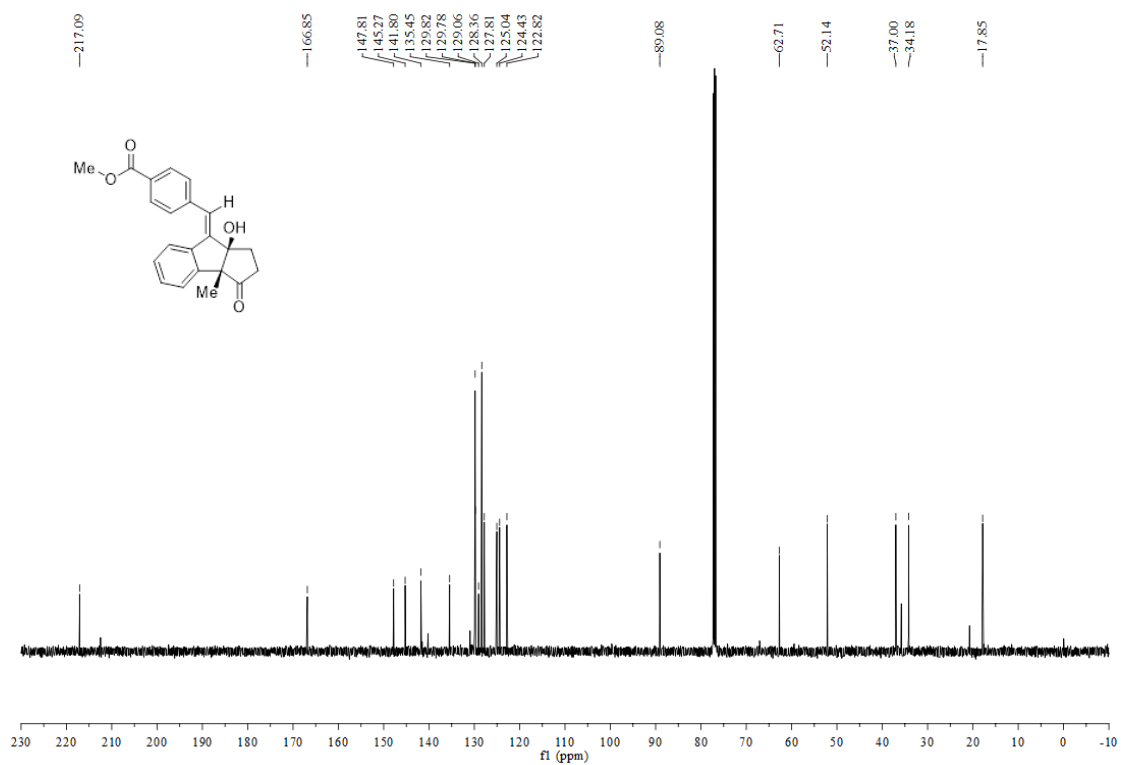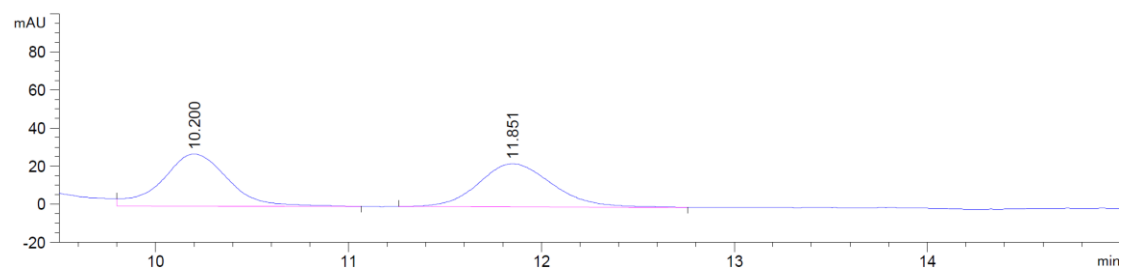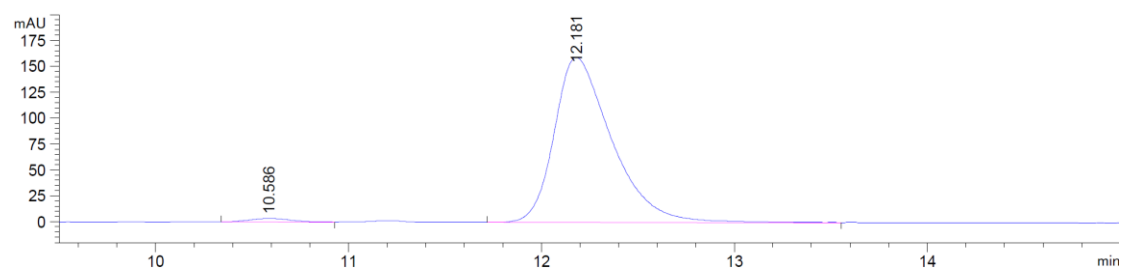

Signal 1: DAD1 A, Sig=254,4 Ref=360,100

| Peak # | RetTime [min] | Type | Width [min] | Area [mAU*s] | Height [mAU] | Area %  |
|--------|---------------|------|-------------|--------------|--------------|---------|
| 1      | 10.586        | BB   | 0.1860      | 50.19617     | 3.40447      | 1.4967  |
| 2      | 12.181        | BV R | 0.3118      | 3303.52246   | 159.37894    | 98.5033 |

**(3*R*,8*aR*)-8*a*-Hydroxy-3*a*-methyl-8-((*E*)-3-methylbenzylidene)-1,3*a*,8,8*a*-tetrahydrocyclopenta[*a*]inden-3(2*H*)-one (2*g*)**

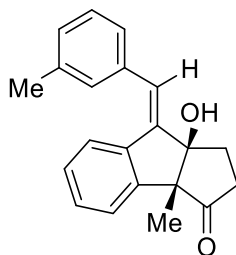

Purified by chromatography on silica gel, eluting with ethyl acetate/petroleum ether 1:5 (v/v); brown solid, Mp = 97-98 °C; 43 mg, 71% yield;  $[\alpha]_D^{20} = -209.1$  ( $c$  1.0, CH<sub>2</sub>Cl<sub>2</sub>), 98% ee [Phenomenex Lux 5u Cellulose-1 column (25 cm × 0.46 cm ID), *n*-hexane/*i*-PrOH = 85/15, 0.7 mL/min, 254 nm;  $t_{\text{minor}} = 9.9$  min,  $t_{\text{major}} = 11.2$  min]; <sup>1</sup>H NMR (500 MHz, CDCl<sub>3</sub>)  $\delta$  7.34-7.27 (m, 2H), 7.25-7.21 (m, 3H), 7.19 (t,  $J = 7.5$  Hz, 1H), 7.12 (d,  $J = 6.5$  Hz, 1H), 7.04 (t,  $J = 7.5$  Hz, 1H), 6.91 (s, 1H), 2.63-2.55 (m, 1H), 2.35 (s, 3H), 2.33-2.23 (m, 3H), 2.12-2.06 (m, 1H), 1.36 (s, 3H). <sup>13</sup>C NMR (125 MHz, CDCl<sub>3</sub>)  $\delta$  217.5, 145.8, 144.9, 138.1, 136.6, 136.1, 129.2, 128.9, 128.4, 128.2, 127.6, 125.3, 124.9, 124.3, 124.2, 89.0, 62.6, 37.0, 34.2, 21.3, 17.7. HRMS (ESI)  $m/z$  Calculated for C<sub>21</sub>H<sub>20</sub>O<sub>2</sub>Na<sup>+</sup> ( $[M+Na]^+$ ) 327.1356, found 327.1356.

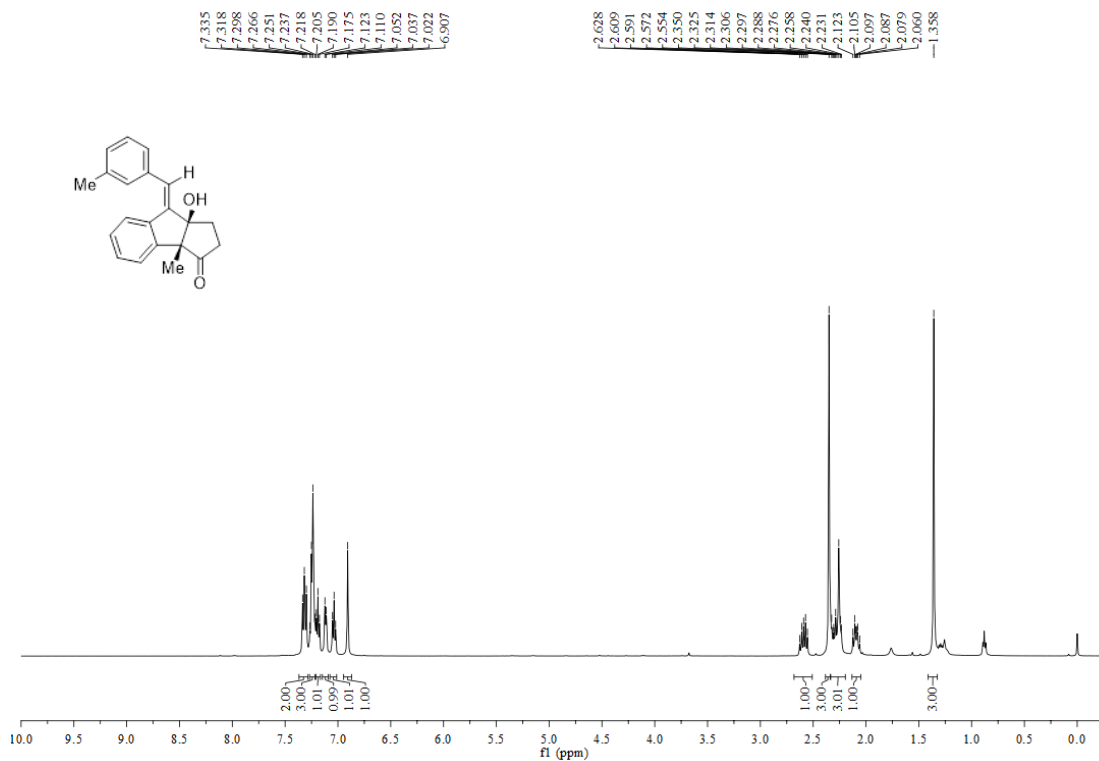

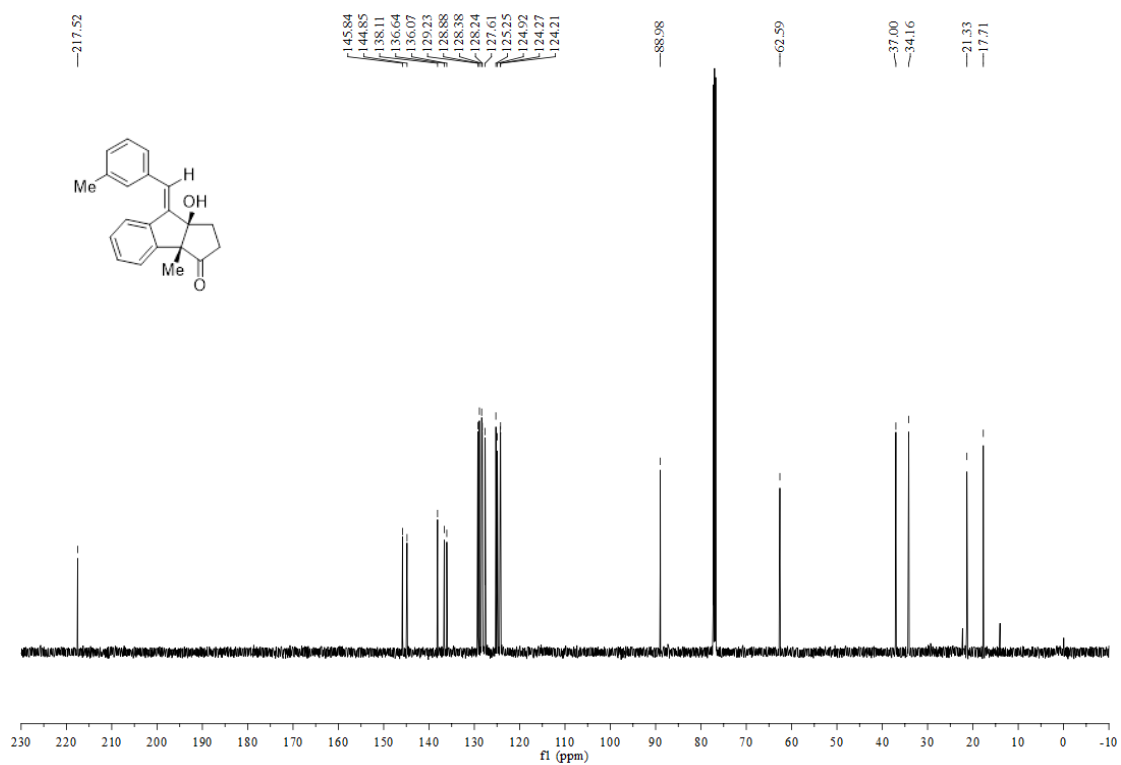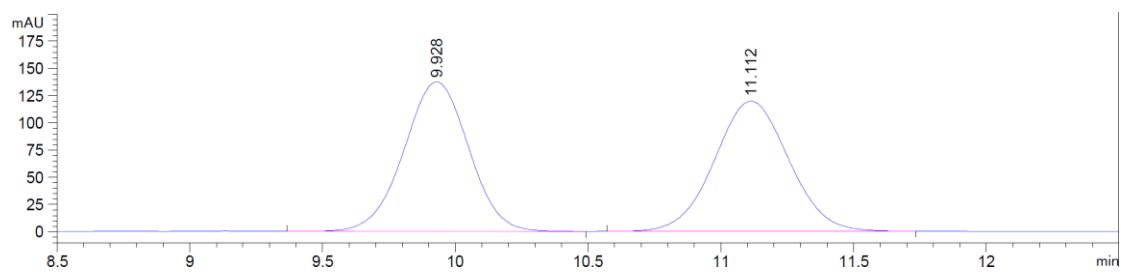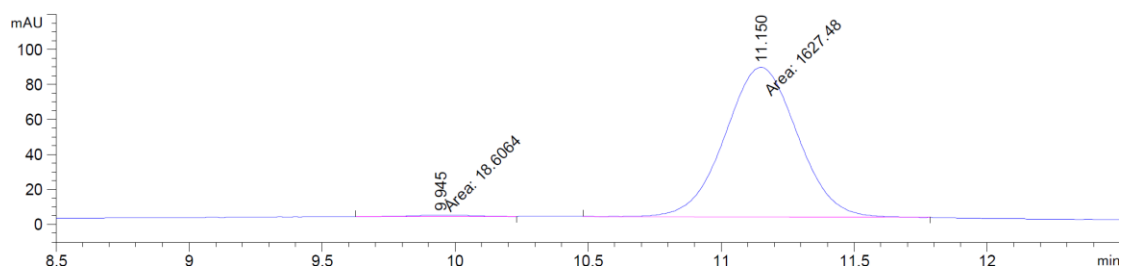

Signal 1: DAD1 A, Sig=254,4 Ref=360,100

| Peak # | RetTime [min] | Type | Width [min] | Area [mAU*s] | Height [mAU] | Area %  |
|--------|---------------|------|-------------|--------------|--------------|---------|
| 1      | 9.945         | MM   | 0.3018      | 18.60638     | 1.02754      | 1.1303  |
| 2      | 11.150        | MM   | 0.3178      | 1627.47791   | 85.35074     | 98.8697 |



**(3*aR*,8*aR*)-8-((*E*)-3-Chlorobenzylidene)-8*a*-hydroxy-3*a*-methyl-1,3*a*,8,8*a*-tetrahydro-cyclopenta[*a*]inden-3(2*H*)-one (2*h*)**

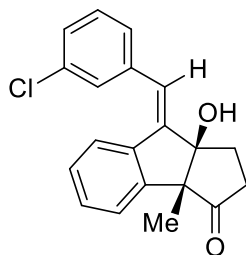

Purified by chromatography on silica gel, eluting with ethyl acetate/petroleum ether 1:5 (v/v); white solid, Mp = 149-150°C; 45 mg, 70% yield;  $[\alpha]_D^{20} = -129.2$  ( $c$  0.5,  $\text{CH}_2\text{Cl}_2$ ), 98% ee [Phenomenex Lux 5u Amylose-2 column (25 cm  $\times$  0.46 cm ID),  $n$ -hexane/ $i$ -PrOH = 85/15, 0.7 mL/min, 254 nm;  $t_{\text{minor}} = 12.2$  min,  $t_{\text{major}} = 15.6$  min];  $^1\text{H}$  NMR (500 MHz,  $\text{CDCl}_3$ )  $\delta$  7.43 (s, 1H), 7.36 (d,  $J = 7.5$  Hz, 1H), 7.32-7.30 (m, 3H), 7.26-7.22 (m, 2H), 7.09 (t,  $J = 7.5$  Hz, 1H), 6.86 (s, 1H), 2.66-2.59 (m, 1H), 2.38-2.25 (m, 2H), 2.23 (s, 1H), 2.11-2.07 (m, 1H), 1.37 (s, 3H).  $^{13}\text{C}$  NMR (125 MHz,  $\text{CDCl}_3$ )  $\delta$  217.2, 147.3, 145.1, 138.7, 135.5, 134.4, 129.8, 129.7, 128.3, 127.8, 127.6, 126.5, 124.9, 124.4, 122.4, 89.0, 62.7, 37.0, 34.2, 17.8. HRMS  $m/z$  (ESI $^+$ ): Calculated for  $\text{C}_{20}\text{H}_{17}\text{ClO}_2^+$  ( $[\text{M}]^+$ ) 324.0917, found 324.0914.

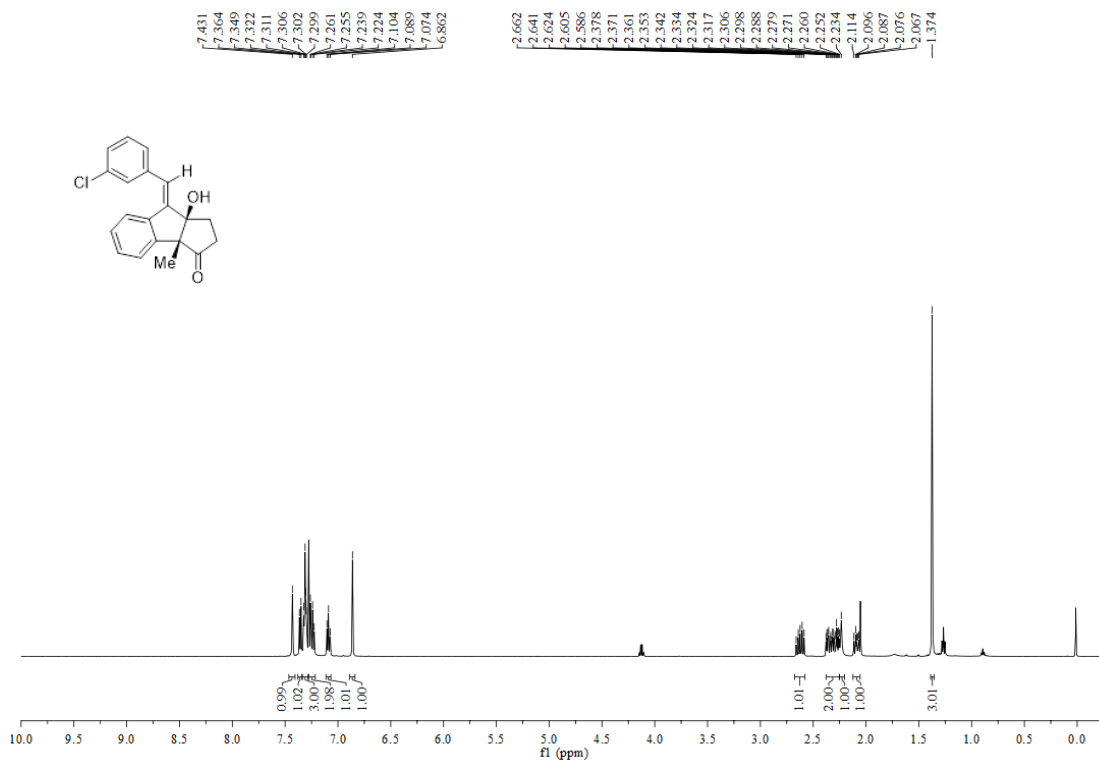

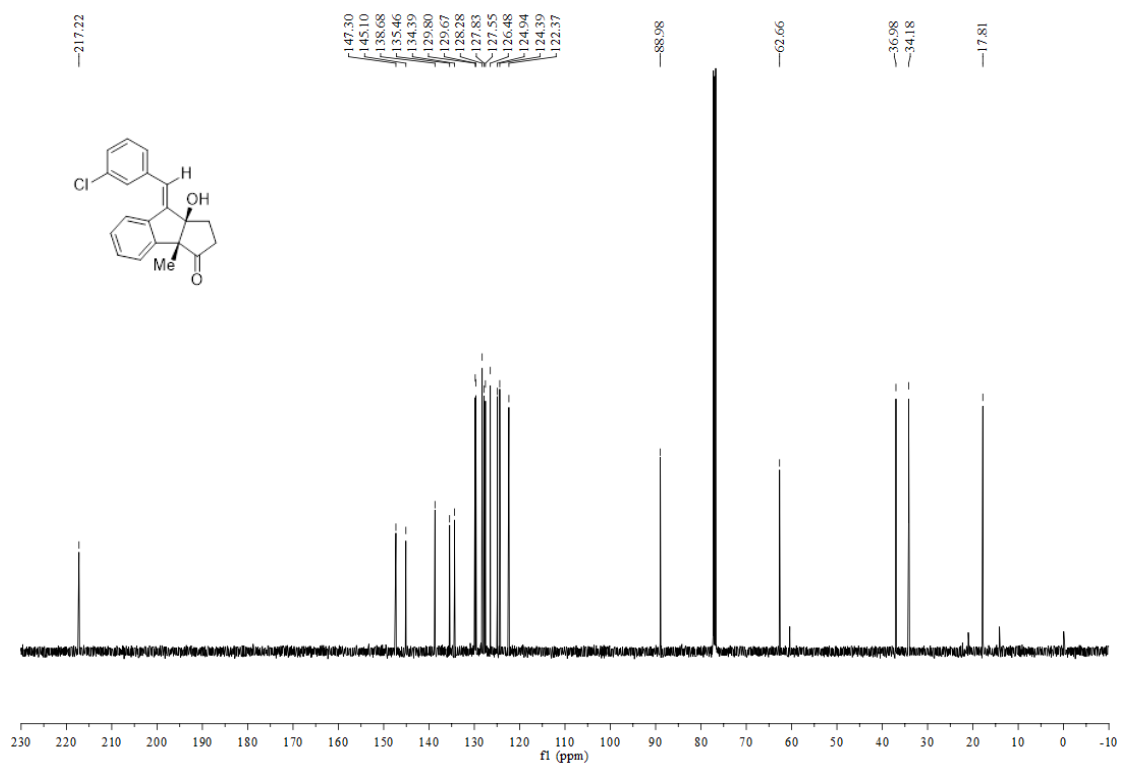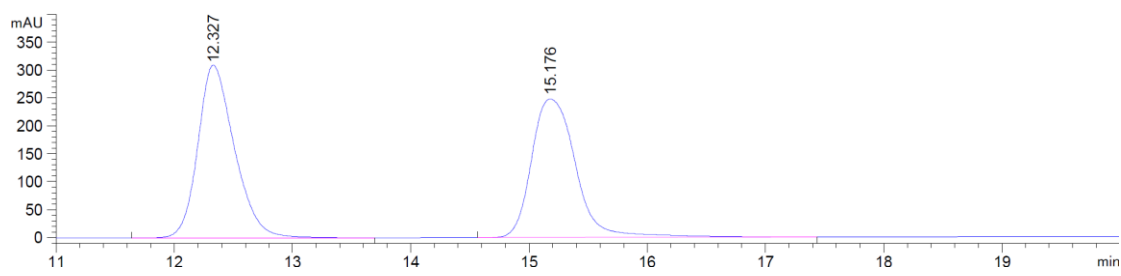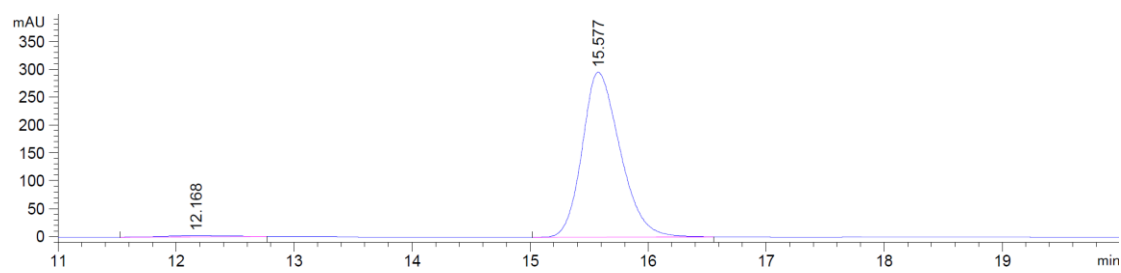

Signal 1: DAD1 A, Sig=254,4 Ref=360,100

| Peak # | RetTime [min] | Type | Width [min] | Area [mAU*s] | Height [mAU] | Area %  |
|--------|---------------|------|-------------|--------------|--------------|---------|
| 1      | 12.168        | BB   | 0.4024      | 70.57710     | 2.46235      | 1.0587  |
| 2      | 15.577        | BB   | 0.3381      | 6595.52393   | 295.89444    | 98.9413 |

**(E)-8-(3-Fluorobenzylidene)-8a-hydroxy-3a-methyl-1,3a,8,8a-tetrahydrocyclopenta[*a*]inden-3(2H)-one (2i)**

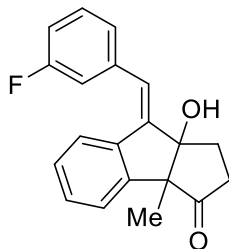

Purified by chromatography on silica gel, eluting with ethyl acetate/petroleum ether 1:5 (v/v); white solid, Mp = 150-151°C; 36 mg, 58% yield;  $[\alpha]_D^{20} = -195.9$  (*c* 0.5, CH<sub>2</sub>Cl<sub>2</sub>), 94% ee [Phenomenex Lux 5u Amylose-2 column (25 cm × 0.46 cm ID), *n*-hexane/*i*-PrOH = 85/15, 0.7 mL/min, 254 nm;  $t_{\text{minor}} = 7.3$  min,  $t_{\text{major}} = 8.5$  min]; <sup>1</sup>H NMR (500 MHz, CDCl<sub>3</sub>)  $\delta$  7.35-7.31 (m, 2H), 7.28 (d, *J* = 7.5 Hz, 1H), 7.24-7.20 (m, 2H), 7.13 (d, *J* = 10.0 Hz, 1H), 7.09-7.06 (m, 1H), 7.03-6.99 (m, 1H), 6.87 (s, 1H), 2.63-2.58 (m, 1H), 2.37-2.24 (m, 2H), 2.17 (s, 1H), 2.11-2.06 (m, 1H), 1.36 (s, 3H). <sup>13</sup>C NMR (125 MHz, CDCl<sub>3</sub>)  $\delta$  217.3, 162.9 (d, *J* = 245.0 Hz), 147.1, 145.1, 139.1 (d, *J* = 8.8 Hz), 135.5, 130.1 (d, *J* = 7.5 Hz), 129.7, 127.8, 125.0, 124.4, 124.1 (d, *J* = 2.5 Hz), 122.6 (d, *J* = 2.5 Hz), 115.1 (d, *J* = 21.3 Hz), 114.4 (d, *J* = 21.3 Hz), 89.0, 62.7, 37.0, 34.2, 17.9. HRMS (ESI) *m/z* Calculated for C<sub>20</sub>H<sub>17</sub>FO<sub>2</sub>Na<sup>+</sup> ([M+Na]<sup>+</sup>) 331.1105, found 331.1105.

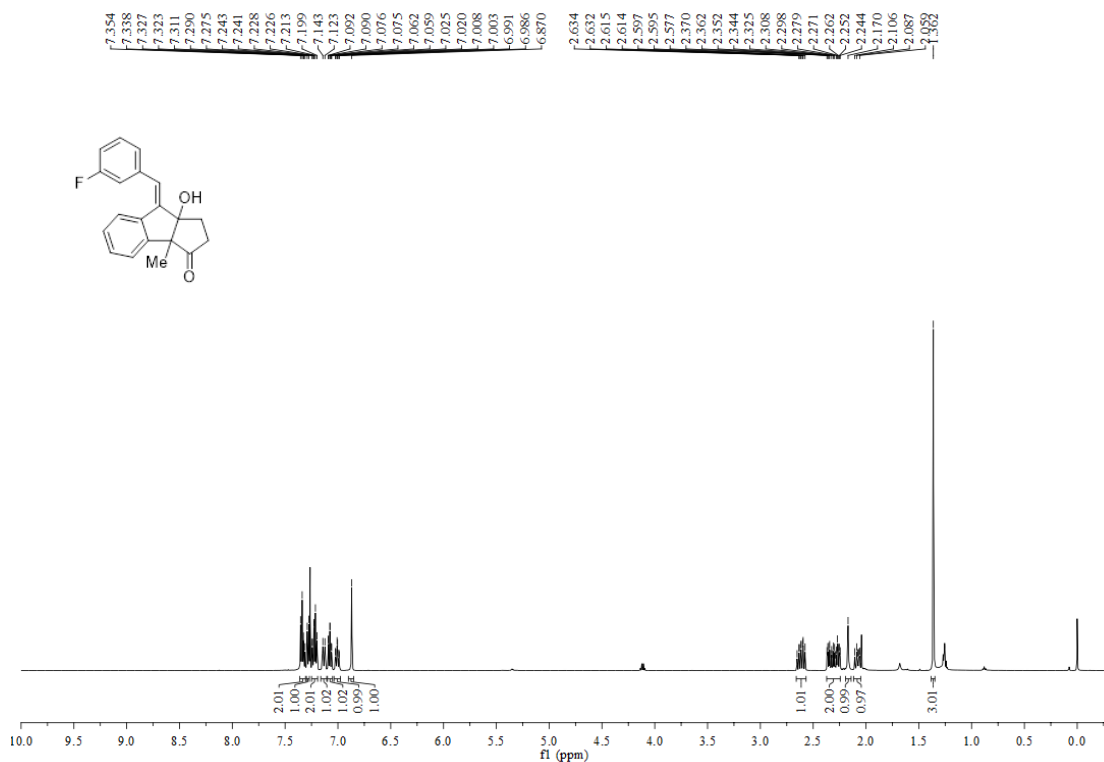

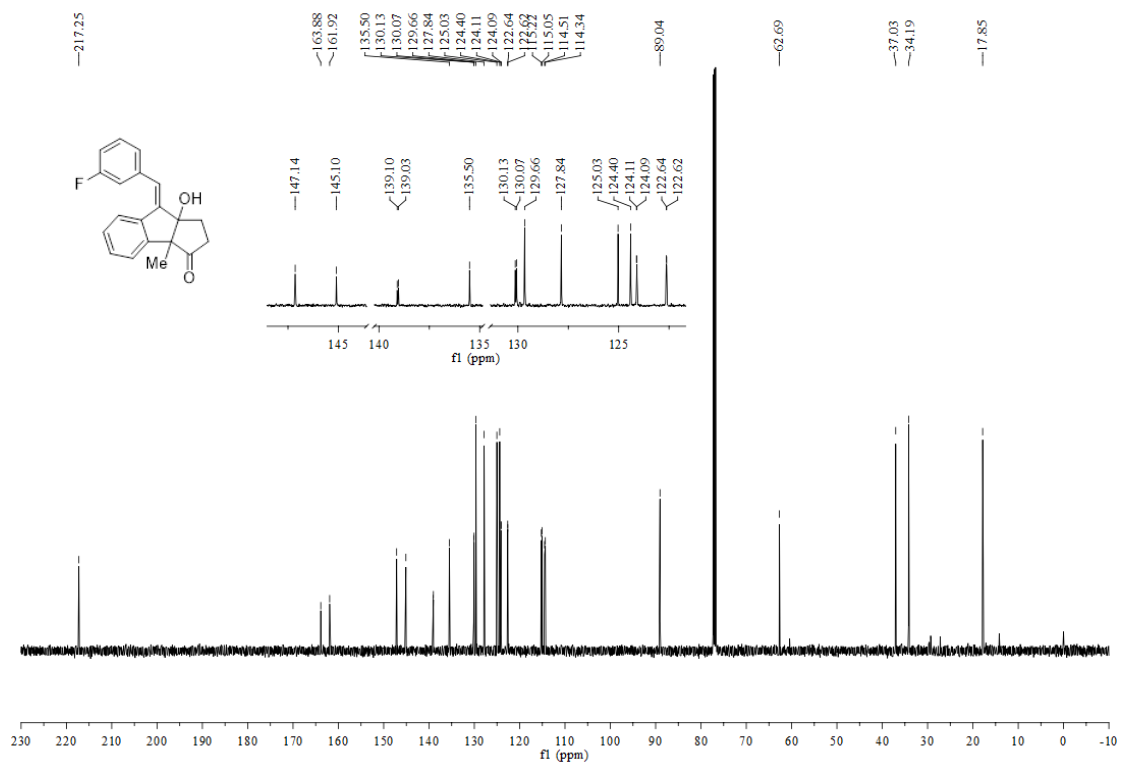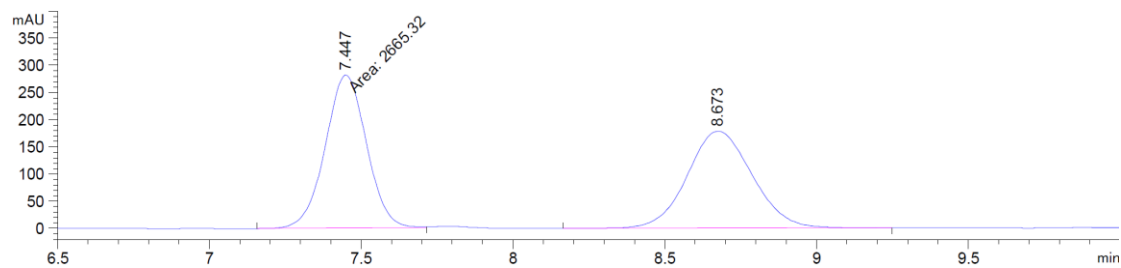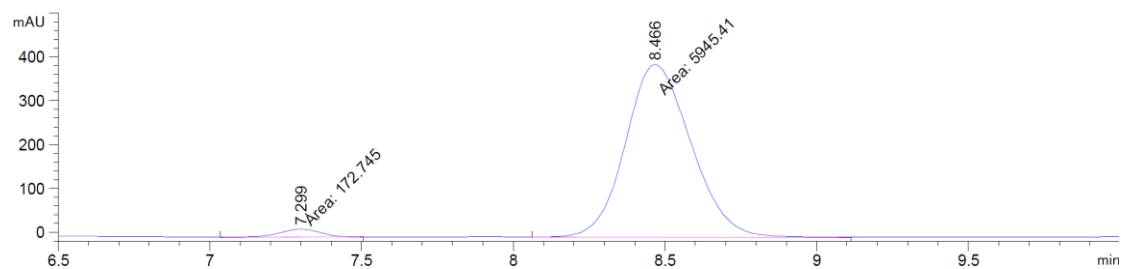

Signal 1: DAD1 A, Sig=254,4 Ref=360,100

| Peak # | RetTime [min] | Type | Width [min] | Area [mAU*s] | Height [mAU] | Area %  |
|--------|---------------|------|-------------|--------------|--------------|---------|
| 1      | 7.299         | MM   | 0.1609      | 172.74529    | 17.88926     | 2.8235  |
| 2      | 8.466         | MM   | 0.2516      | 5945.41016   | 393.82196    | 97.1765 |

**(3aR,8aR)-8-((E)-3,5-Dimethoxybenzylidene)-8a-hydroxy-3a-methyl-1,3a,8,8a-tetra-hydrocyclopenta[a]inden-3(2H)-one (2j)**

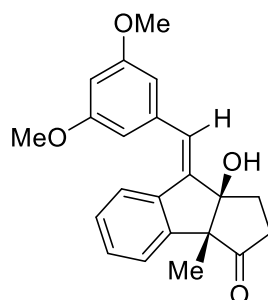

Purified by chromatography on silica gel, eluting with ethyl acetate/petroleum ether 1:5 (v/v); yellow oil; 55 mg, 79% yield;  $[\alpha]_D^{20} = -147.8$  (*c* 0.5, CH<sub>2</sub>Cl<sub>2</sub>), 99% ee [Phenomenex Lux 5u Amylose-2 column (25 cm × 0.46 cm ID), *n*-hexane/*i*-PrOH = 85/15, 0.7 mL/min, 254 nm;  $t_{\text{minor}} = 10.6$  min,  $t_{\text{major}} = 15.4$  min]; <sup>1</sup>H NMR (600 MHz, CDCl<sub>3</sub>)  $\delta$  7.43 (d, *J* = 7.8 Hz, 1H), 7.36 (d, *J* = 7.8 Hz, 1H), 7.23 (t, *J* = 7.2 Hz, 1H), 7.10 (t, *J* = 7.2 Hz, 1H), 6.89 (s, 1H), 6.60 (d, *J* = 2.4 Hz, 2H), 6.45 (d, *J* = 1.8 Hz, 1H), 3.80 (s, 6H), 2.65-2.59 (m, 1H), 2.37-2.33 (m, 1H), 2.29-2.27 (m, 1H), 2.15-2.12 (m, 1H), 1.70 (s, 1H), 1.38 (s, 3H). <sup>13</sup>C NMR (150 MHz, CDCl<sub>3</sub>)  $\delta$  217.4, 160.9, 146.4, 145.0, 138.7, 135.9, 129.5, 127.7, 125.4, 124.3, 124.0, 106.1, 100.0, 89.0, 62.6, 55.4, 37.1, 34.2, 17.8. HRMS *m/z* (ESI<sup>+</sup>): Calculated for C<sub>22</sub>H<sub>23</sub>O<sub>4</sub><sup>+</sup> ([M+H]<sup>+</sup>) 351.1591, found 351.1594.

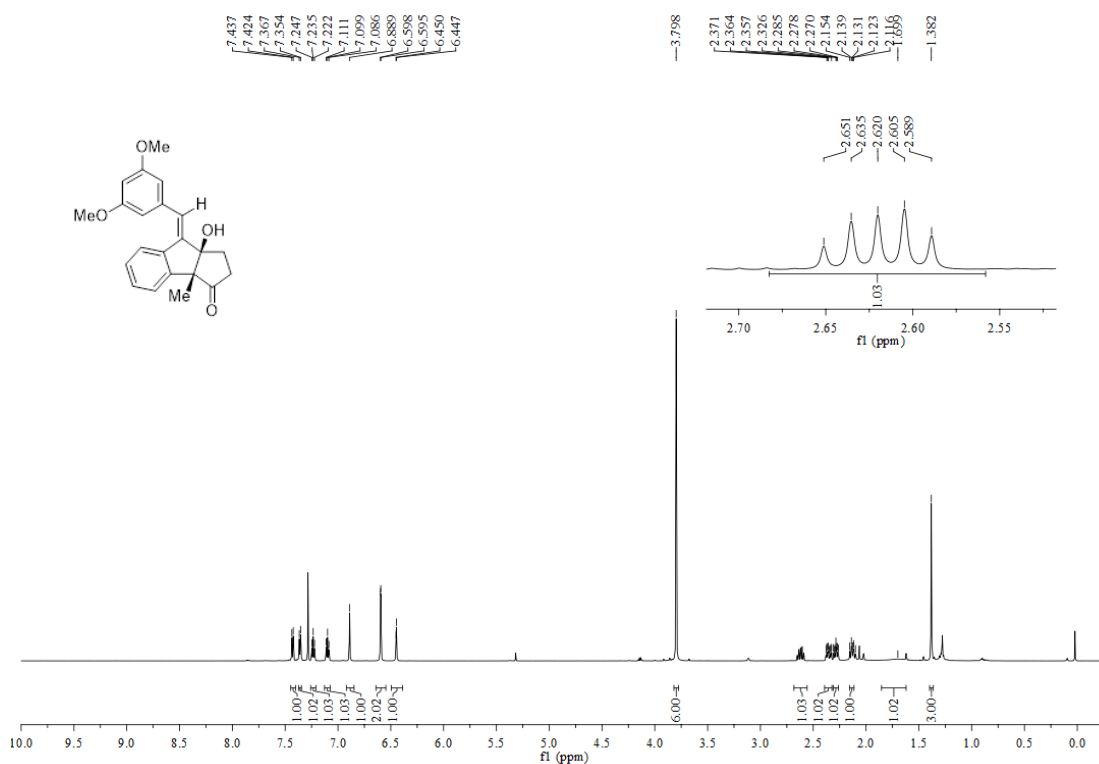

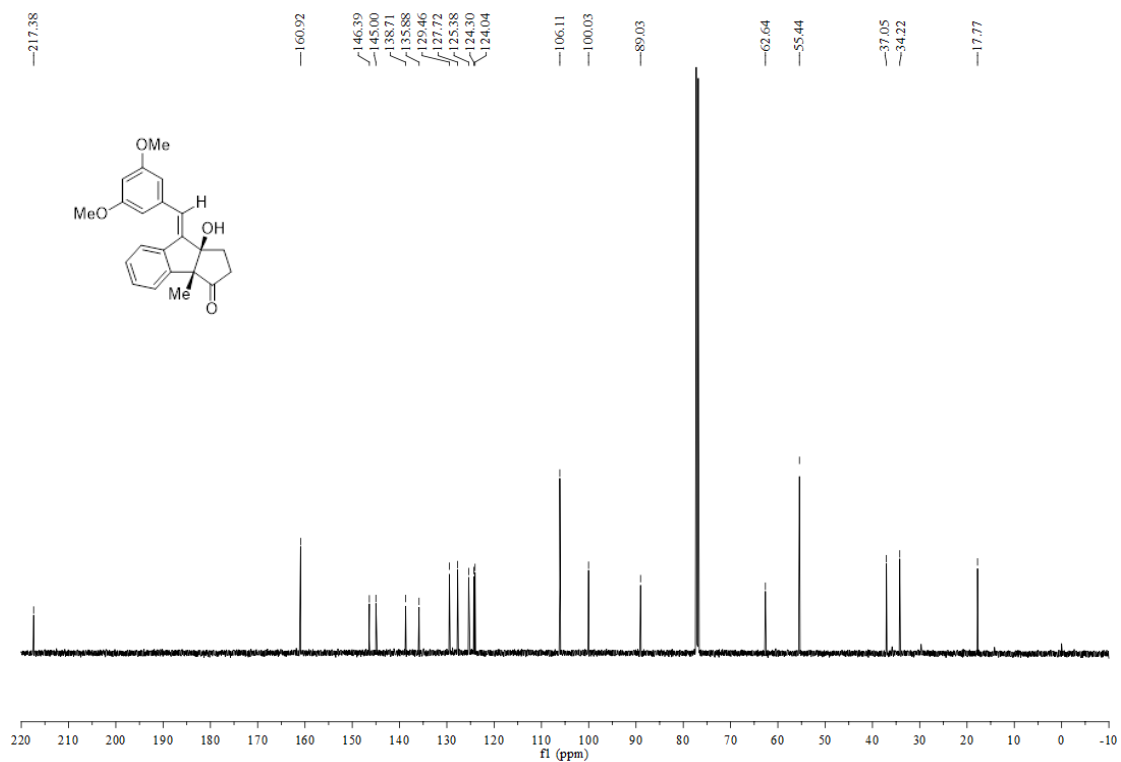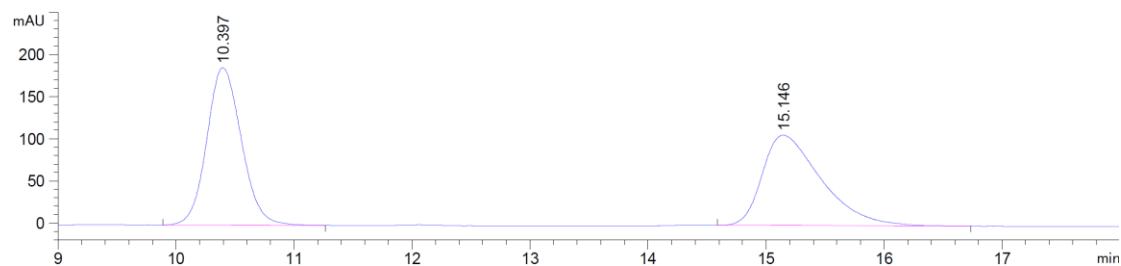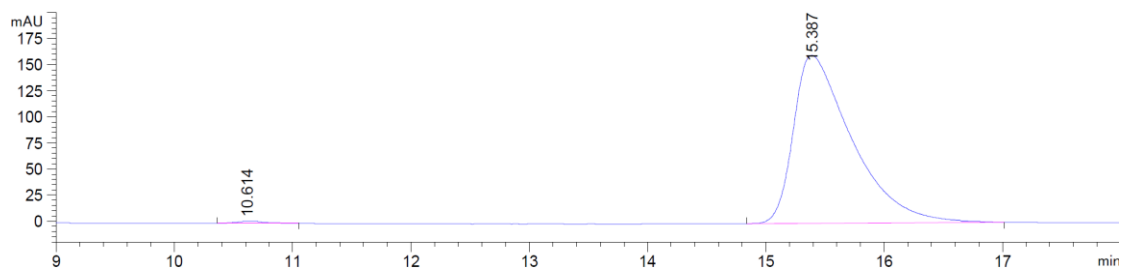

Signal 1: DAD1 A, Sig=254,4 Ref=360,100

| Peak # | RetTime [min] | Type | Width [min] | Area [mAU*s] | Height [mAU] | Area %  |
|--------|---------------|------|-------------|--------------|--------------|---------|
| 1      | 10.614        | BB   | 0.2059      | 34.73489     | 2.04816      | 0.6240  |
| 2      | 15.387        | BB   | 0.4830      | 5531.69629   | 160.92369    | 99.3760 |

**(3*aR*,8*aR*)-8*a*-Hydroxy-3*a*-methyl-8-((*E*)-2-methylbenzylidene)-1,3*a*,8,8*a*-tetrahydrocyclopenta[*a*]inden-3(2*H*)-one (2*k*)**

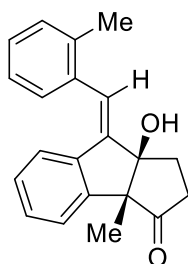

Purified by chromatography on silica gel, eluting with ethyl acetate/petroleum ether 1:5 (v/v); brown oil; 50 mg, 82% yield;  $[\alpha]_D^{20} = -202.4$  ( $c$  1.0,  $\text{CH}_2\text{Cl}_2$ ), 99% ee [Phenomenex Lux 5u Cellulose-1 column (25 cm  $\times$  0.46 cm ID),  $n$ -hexane/ $i$ -PrOH = 85/15, 0.7 mL/min, 254 nm;  $t_{\text{major}} = 11.8$  min,  $t_{\text{minor}} = 13.0$  min];  $^1\text{H}$  NMR (500 MHz,  $\text{CDCl}_3$ )  $\delta$  7.32 (d,  $J = 7.5$  Hz, 1H), 7.29 (d,  $J = 7.5$  Hz, 1H), 7.26 (d,  $J = 1.0$  Hz, 1H), 7.25-7.23 (m, 1H), 7.17 (t,  $J = 7.5$  Hz, 2H), 6.98 (t,  $J = 7.5$  Hz, 1H), 6.95 (s, 1H), 6.86 (d,  $J = 7.5$  Hz, 1H), 2.64-2.56 (m, 1H), 2.35-2.29 (m, 3H), 2.27 (s, 3H), 2.21-2.15 (m, 1H), 1.36 (s, 3H).  $^{13}\text{C}$  NMR (126 MHz,  $\text{CDCl}_3$ )  $\delta$  217.4, 146.5, 144.7, 136.3, 136.1, 136.0, 130.2, 129.2, 128.4, 127.8, 127.7, 125.9, 124.7, 124.1, 123.4, 88.7, 62.5, 37.0, 34.4, 19.8, 17.7. HRMS  $m/z$  (ESI $^+$ ): Calculated for  $\text{C}_{21}\text{H}_{20}\text{O}_2\text{Na}^+$  ( $[\text{M}+\text{Na}]^+$ ) 327.1356, found 327.1355.

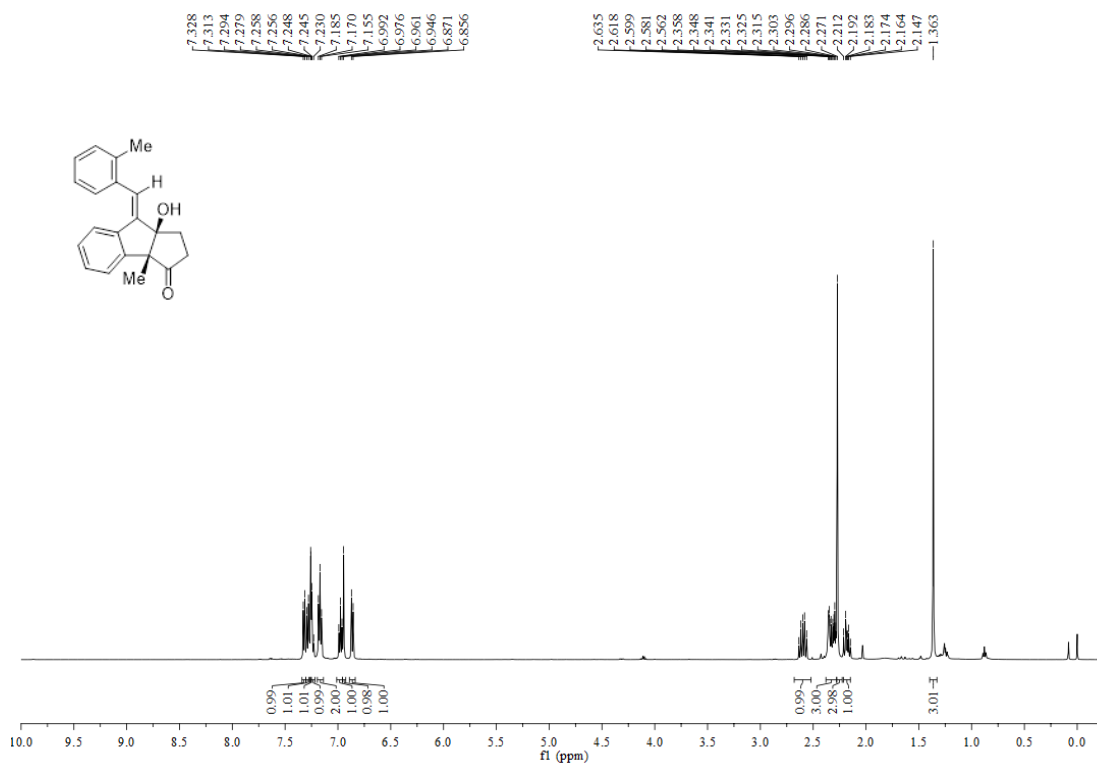

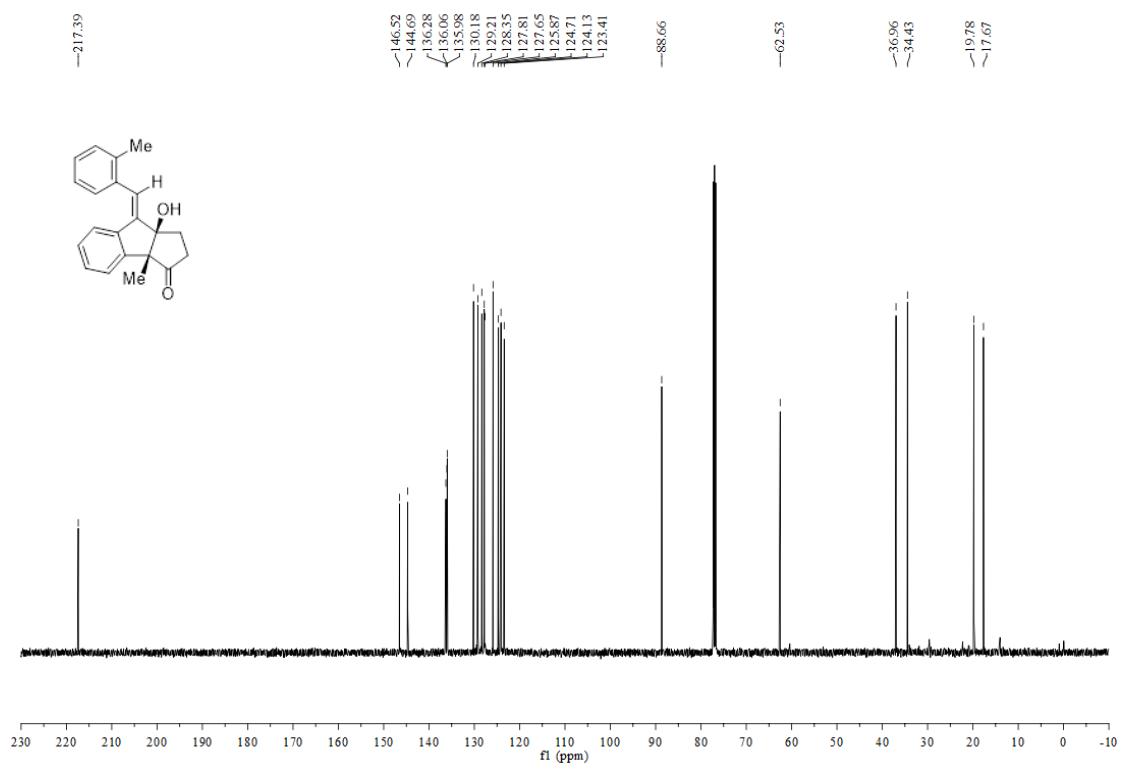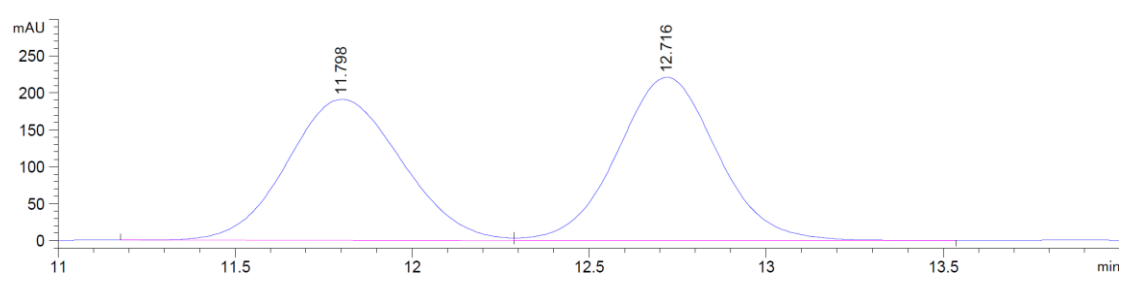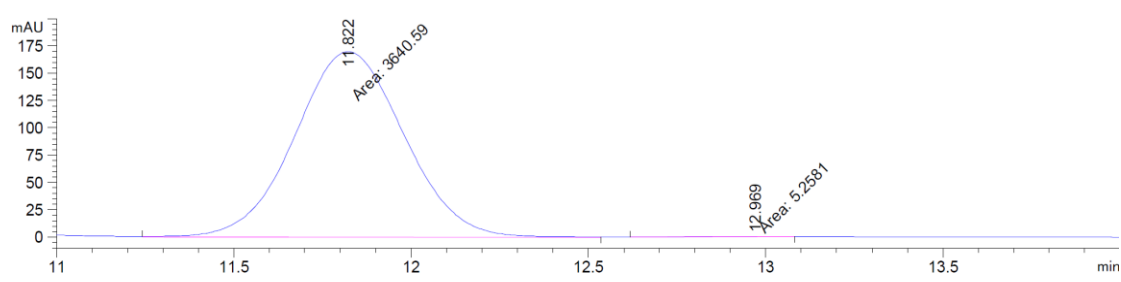

Signal 1: DAD1 A, Sig=254,4 Ref=360,100

| Peak # | RetTime [min] | Type | Width [min] | Area [mAU*s] | Height [mAU] | Area %  |
|--------|---------------|------|-------------|--------------|--------------|---------|
| 1      | 11.822        | MM   | 0.3572      | 3640.58960   | 169.87329    | 99.8558 |
| 2      | 12.969        | MM   | 0.3387      | 5.25810      | 2.58749e-1   | 0.1442  |



**(3*R*,8*aR*)-8*a*-Hydroxy-8-((*E*)-2-methoxybenzylidene)-3*a*-methyl-1,3*a*,8,8*a*-tetrahydrocyclopenta[*a*]inden-3(2*H*)-one (2l)**

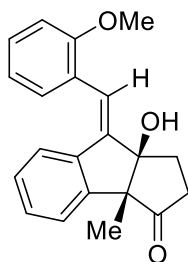

Purified by chromatography on silica gel, eluting with ethyl acetate/petroleum ether 1:3 (v/v); yellow oil; 40 mg, 62% yield;  $[\alpha]_D^{20} = -160.2$  (*c* 0.5, CH<sub>2</sub>Cl<sub>2</sub>), 96% ee [Phenomenex Lux 5u Amylose-2 column (25 cm × 0.46 cm ID), *n*-hexane/*i*-PrOH = 85/15, 0.7 mL/min, 254 nm;  $t_{\text{minor}} = 6.7$  min,  $t_{\text{major}} = 7.9$  min]; <sup>1</sup>H NMR (500 MHz, CDCl<sub>3</sub>) δ 7.44 (d, *J* = 7.5 Hz, 1H), 7.34-7.26 (m, 3H), 7.20-7.17 (m, 1H), 7.04-7.01 (m, 1H), 6.94-6.90 (m, 3H), 3.81 (s, 3H), 2.62-2.54 (m, 1H), 2.34-2.26 (m, 3H), 2.18-2.15 (m, 1H), 1.36 (s, 3H). <sup>13</sup>C NMR (125 MHz, CDCl<sub>3</sub>) δ 217.5, 157.0, 145.9, 144.9, 136.5, 129.5, 129.2, 129.1, 127.6, 125.4, 124.7, 124.1, 120.4, 120.3, 110.9, 89.0, 62.6, 55.4, 37.0, 34.2, 17.6. HRMS *m/z* (ESI<sup>+</sup>): Calculated for C<sub>21</sub>H<sub>20</sub>O<sub>3</sub><sup>+</sup> ( $[M]^+$ ) 320.1407, found 320.1410.

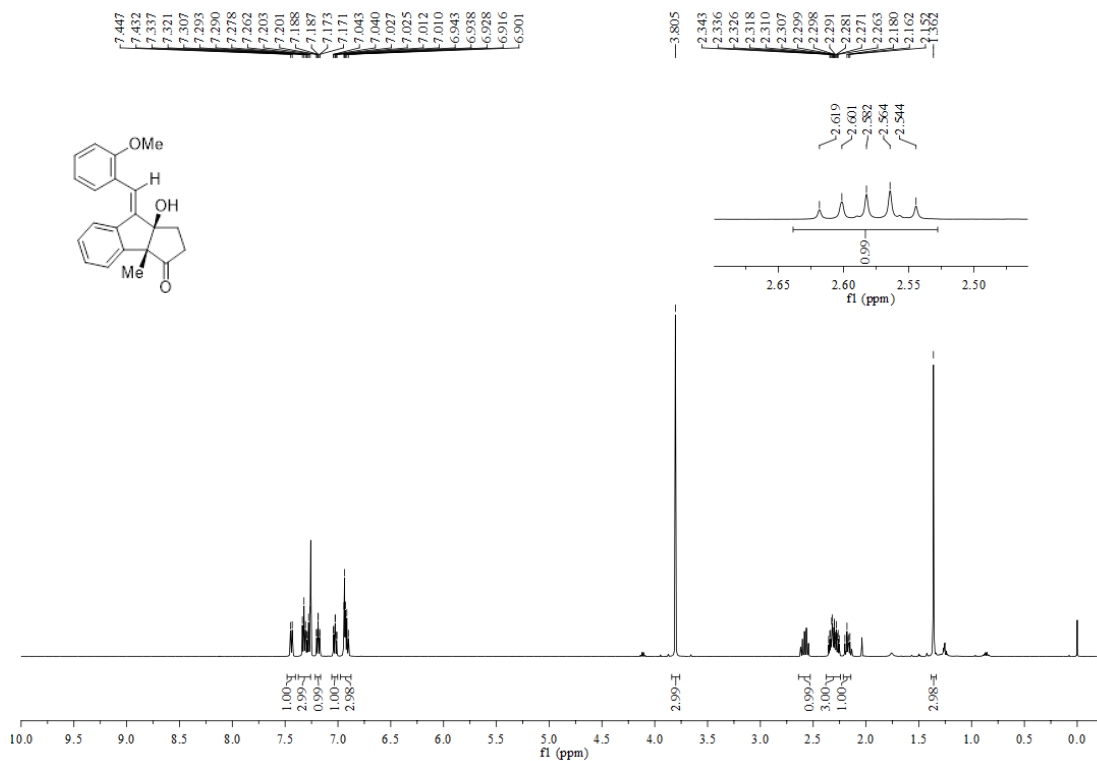

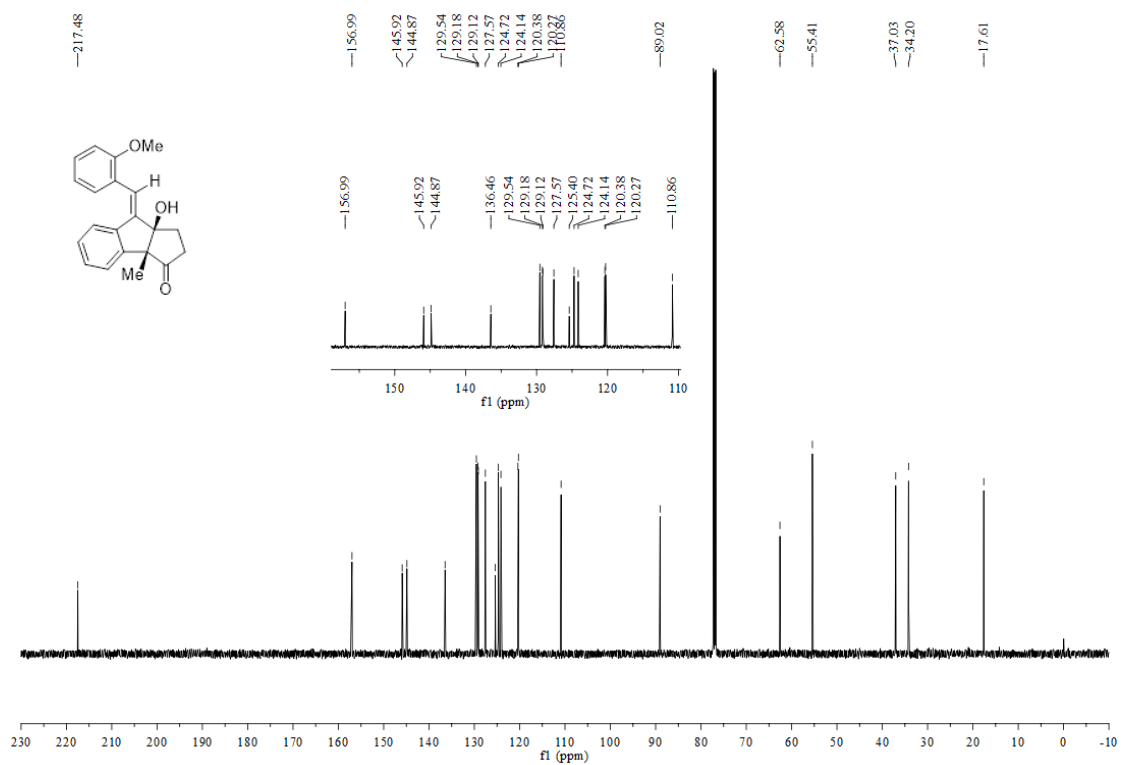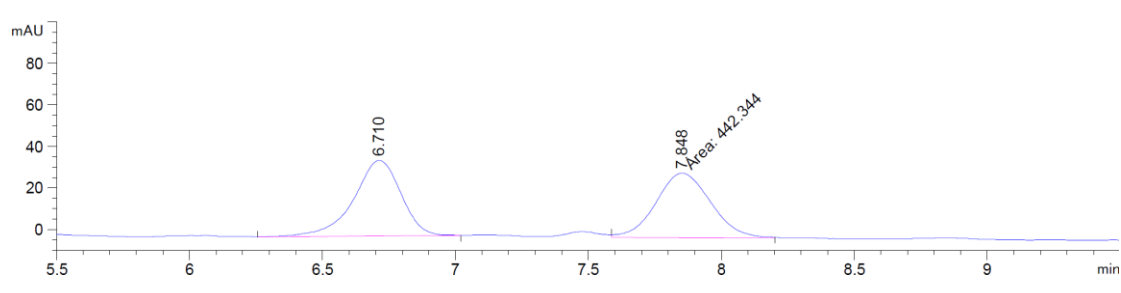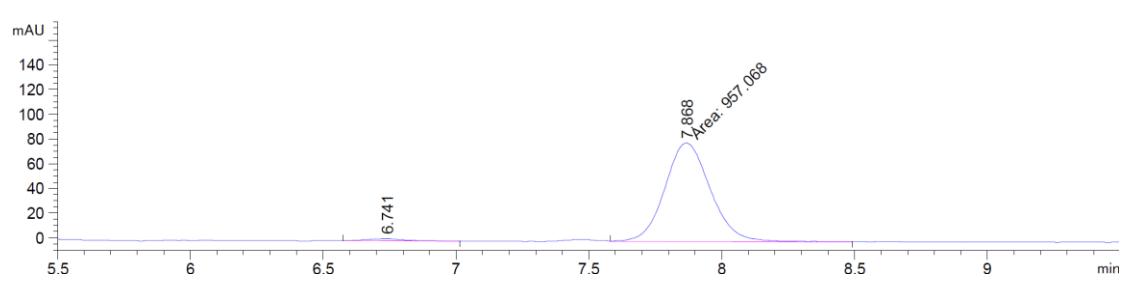

Signal 1: DAD1 A, Sig=254,4 Ref=360,100

| Peak # | RetTime [min] | Type | Width [min] | Area [mAU*s] | Height [mAU] | Area %  |
|--------|---------------|------|-------------|--------------|--------------|---------|
| 1      | 6.741         | BB   | 0.1499      | 17.83801     | 1.68024      | 1.8297  |
| 2      | 7.868         | MM   | 0.1992      | 957.06805    | 80.06898     | 98.1703 |

**(3*aR*,8*aR*,*E*)-8*a*-Hydroxy-3*a*-methyl-8-(naphthalen-2-ylmethylene)-1,3*a*,8,8*a*-tetrahydrocyclopenta[*a*]inden-3(2*H*)-one (2*m*)**

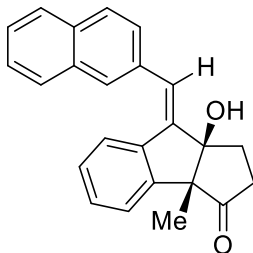

Purified by chromatography on silica gel, eluting with ethyl acetate/petroleum ether 1:5 (v/v); yellow solid, Mp = 130-131 °C; 50 mg, 74% yield;  $[\alpha]_D^{20} = -212.2$  (*c* 0.5, CH<sub>2</sub>Cl<sub>2</sub>), 95% ee [Phenomenex Lux 5u Amylose-2 column (25 cm × 0.46 cm ID), *n*-hexane/*i*-PrOH = 85/15, 0.7 mL/min, 280 nm;  $t_{\text{minor}} = 9.6$  min,  $t_{\text{major}} = 12.8$  min,]; <sup>1</sup>H NMR (500 MHz, CDCl<sub>3</sub>) δ 7.89 (s, 1H), 7.86-7.82 (m, 2H), 7.79 (dd, *J* = 6.0, 3.5 Hz, 1H), 7.54 (dd, *J* = 8.0, 1.5 Hz, 1H), 7.51-7.47 (m, 2H), 7.34 (dd, *J* = 17.0, 7.5 Hz, 2H), 7.20 (t, *J* = 7.5 Hz, 1H), 7.07 (s, 1H), 7.00 (t, *J* = 7.5 Hz, 1H), 2.67-2.59 (m, 1H), 2.39-2.28 (m, 2H), 2.20 (s, 1H), 2.16-2.09 (m, 1H), 1.40 (s, 3H). <sup>13</sup>C NMR (125 MHz, CDCl<sub>3</sub>) δ 217.4, 146.4, 145.0, 136.0, 134.2, 133.4, 132.7, 129.4, 128.0, 127.9, 127.7, 127.1, 126.5, 126.3, 126.1, 125.0, 124.3, 124.0, 89.2, 62.7, 37.1, 34.2, 17.8. HRMS *m/z* (ESI<sup>+</sup>): Calculated for C<sub>24</sub>H<sub>20</sub>O<sub>2</sub><sup>+</sup> ([M]<sup>+</sup>) 340.1463, found 340.1461.

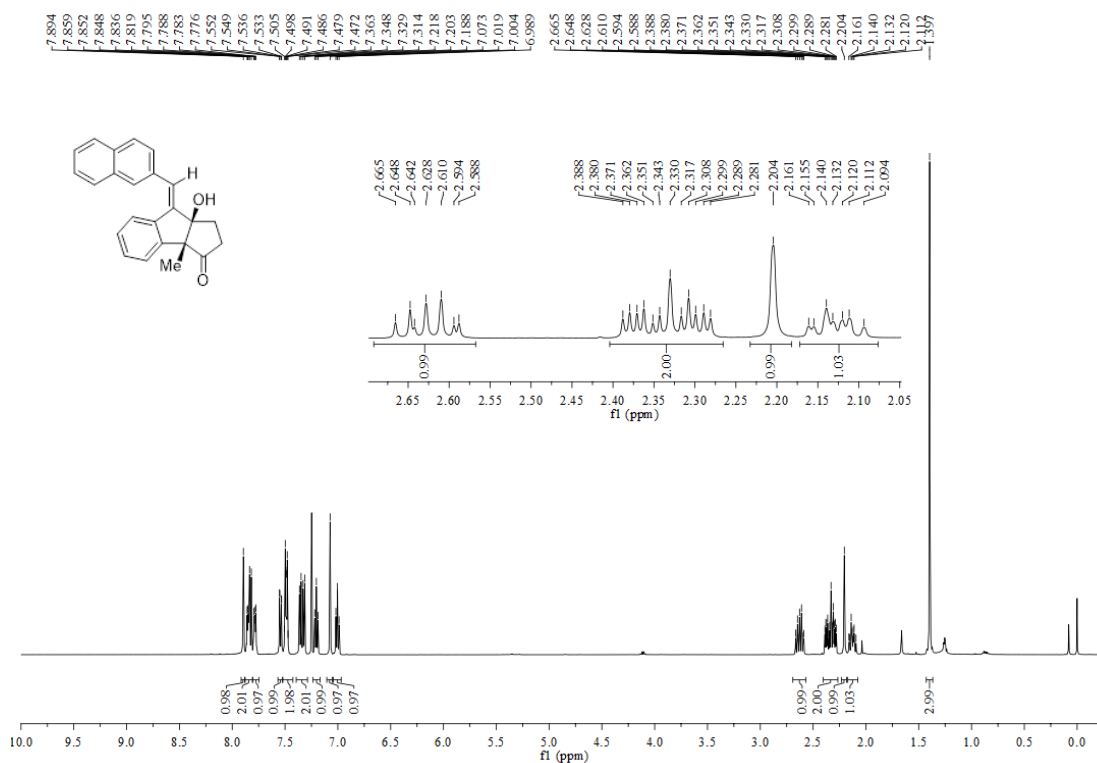

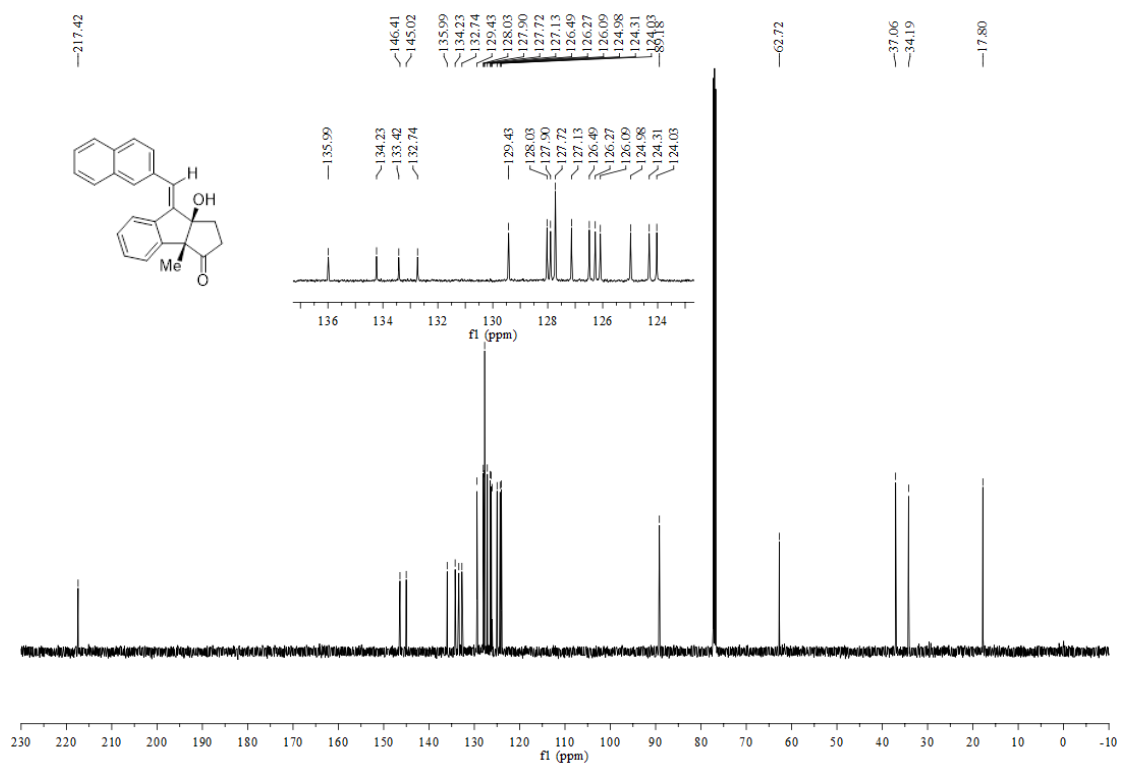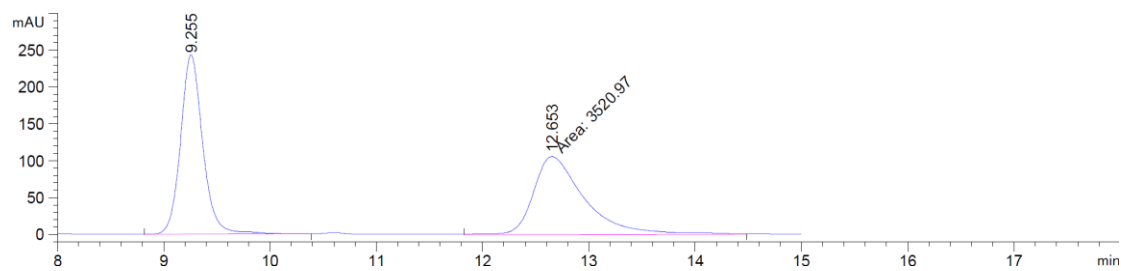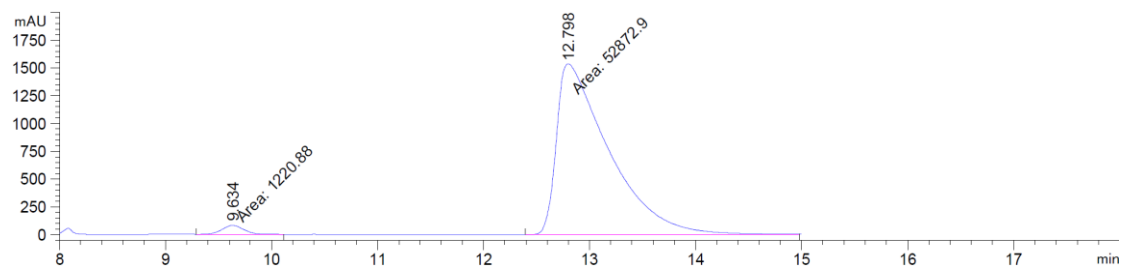

Signal 7: DAD1 G, Sig=280,4 Ref=360,100

| Peak # | RetTime [min] | Type | Width [min] | Area [mAU*s] | Height [mAU] | Area %  |
|--------|---------------|------|-------------|--------------|--------------|---------|
| 1      | 9.634         | MM   | 0.2483      | 1220.88220   | 81.94859     | 2.2570  |
| 2      | 12.798        | MM   | 0.5731      | 5.28729e4    | 1537.61206   | 97.7430 |

**(3*R*,8*aR*,*E*)-8*a*-Hydroxy-3*a*-methyl-8-(thiophen-2-ylmethylene)-1,3*a*,8,8*a*-tetrahydrocyclopenta[*a*]inden-3(2*H*)-one (2*n*)**

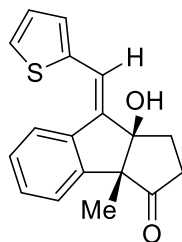

Purified by chromatography on silica gel, eluting with ethyl acetate/petroleum ether 1:5 (v/v); yellow solid, Mp = 158-159 °C; 30 mg, 51% yield;  $[\alpha]_D^{20} = -330.4$  ( $c$  0.5, CH<sub>2</sub>Cl<sub>2</sub>), 98% ee [Phenomenex Lux 5u Amylose-2 column (25 cm × 0.46 cm ID), *n*-hexane/*i*-PrOH = 90/10, 0.7 mL/min, 254 nm;  $t_{\text{minor}} = 10.1$  min,  $t_{\text{major}} = 14.0$  min]; <sup>1</sup>H NMR (500 MHz, CDCl<sub>3</sub>)  $\delta$  7.78 (d,  $J = 8.0$  Hz, 1H), 7.34-7.31 (m, 2H), 7.24-7.21 (m, 2H), 7.17-7.16 (m, 1H), 7.05 (dd,  $J = 5.0, 3.5$  Hz, 1H), 6.90 (s, 1H), 2.61-2.55 (m, 1H), 2.34-2.21 (m, 3H), 2.10-2.00 (m, 1H), 1.33 (s, 3H). <sup>13</sup>C NMR (125 MHz, CDCl<sub>3</sub>)  $\delta$  217.3, 146.3, 144.9, 138.9, 135.7, 129.6, 127.8, 127.3, 127.2, 125.6, 125.0, 124.3, 116.1, 89.2, 62.6, 37.0, 34.2, 17.7. Calculated for C<sub>18</sub>H<sub>16</sub>O<sub>2</sub>S<sup>+</sup> ([M]<sup>+</sup>) 296.0866, found 296.0866.

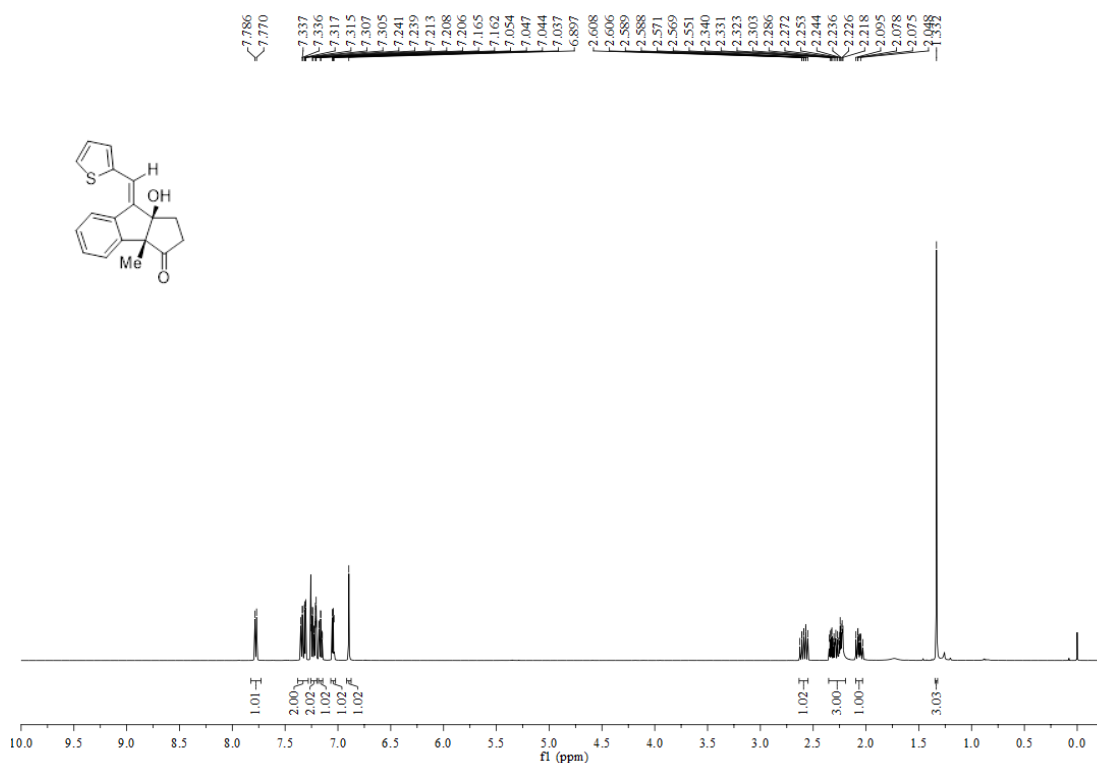

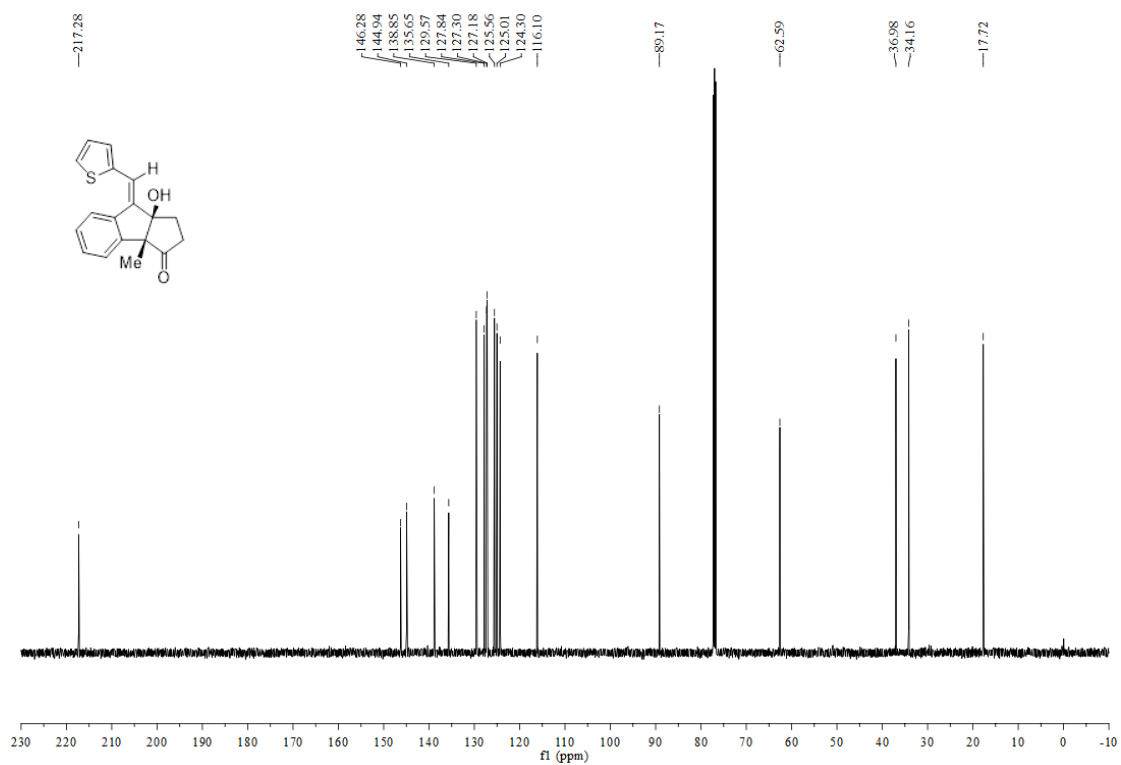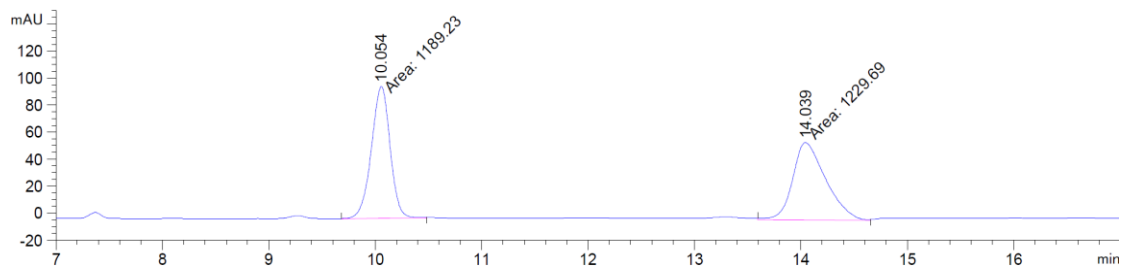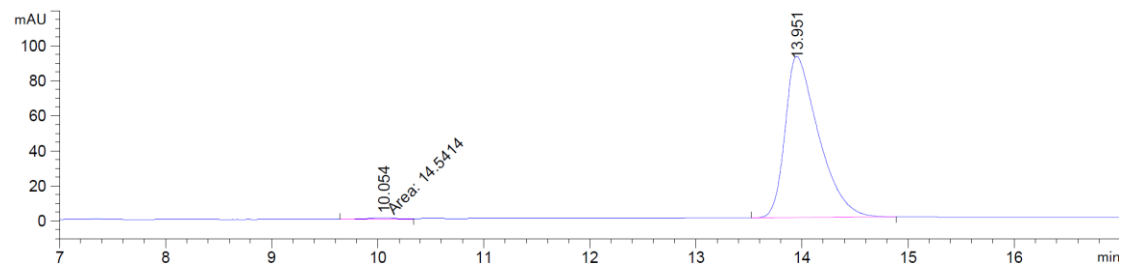

Signal 1: DAD1 A, Sig=254,4 Ref=360,100

| Peak # | RetTime [min] | Type | Width [min] | Area [mAU*s] | Height [mAU] | Area %  |
|--------|---------------|------|-------------|--------------|--------------|---------|
| 1      | 10.054        | MM   | 0.2821      | 14.54141     | 8.59223e-1   | 0.7141  |
| 2      | 13.951        | BB   | 0.3241      | 2021.80762   | 92.10149     | 99.2859 |

**(3*aR*,8*aR*,*E*)-8-Ethylidene-8*a*-hydroxy-3*a*-methyl-1,3*a*,8,8*a*-tetrahydrocyclopenta[*a*]inden-3(2*H*)-one (2*o*)**

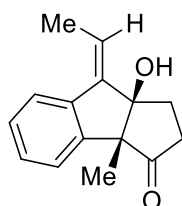

Purified by chromatography on silica gel, eluting with ethyl acetate/petroleum ether 1:5 (v/v); white solid, Mp = 120-121 °C; 36 mg, 78% yield;  $[\alpha]_D^{20} = -222.0$  (*c* 0.5, CH<sub>2</sub>Cl<sub>2</sub>), 98% ee [Phenomenex Lux 5u Amylose-2 column (25 cm × 0.46 cm ID), *n*-hexane/*i*-PrOH = 80/20, 0.7 mL/min, 254 nm;  $t_{\text{minor}} = 6.6$  min,  $t_{\text{major}} = 8.4$  min]; <sup>1</sup>H NMR (500 MHz, CDCl<sub>3</sub>) δ 7.61 (d, *J* = 7.5 Hz, 1H), 7.37 (d, *J* = 7.5 Hz, 1H), 7.32-7.25 (m, 2H), 6.06 (q, *J* = 7.0 Hz, 1H), 2.57-2.50 (m, 1H), 2.29-2.22 (m, 1H), 2.18-2.13 (m, 1H), 2.10 (d, *J* = 7.5 Hz, 3H), 2.09-2.04 (m, 2H), 1.29 (s, 3H). <sup>13</sup>C NMR (125 MHz, CDCl<sub>3</sub>) δ 217.7, 145.1, 144.1, 137.4, 128.4, 128.0, 125.1, 124.3, 119.9, 88.3, 62.5, 37.0, 34.0, 17.4, 14.2. HRMS *m/z* (ESI<sup>+</sup>): Calculated for C<sub>15</sub>H<sub>16</sub>O<sub>2</sub>Na<sup>+</sup> ([M+Na]<sup>+</sup>) 251.1043, found 251.1042.

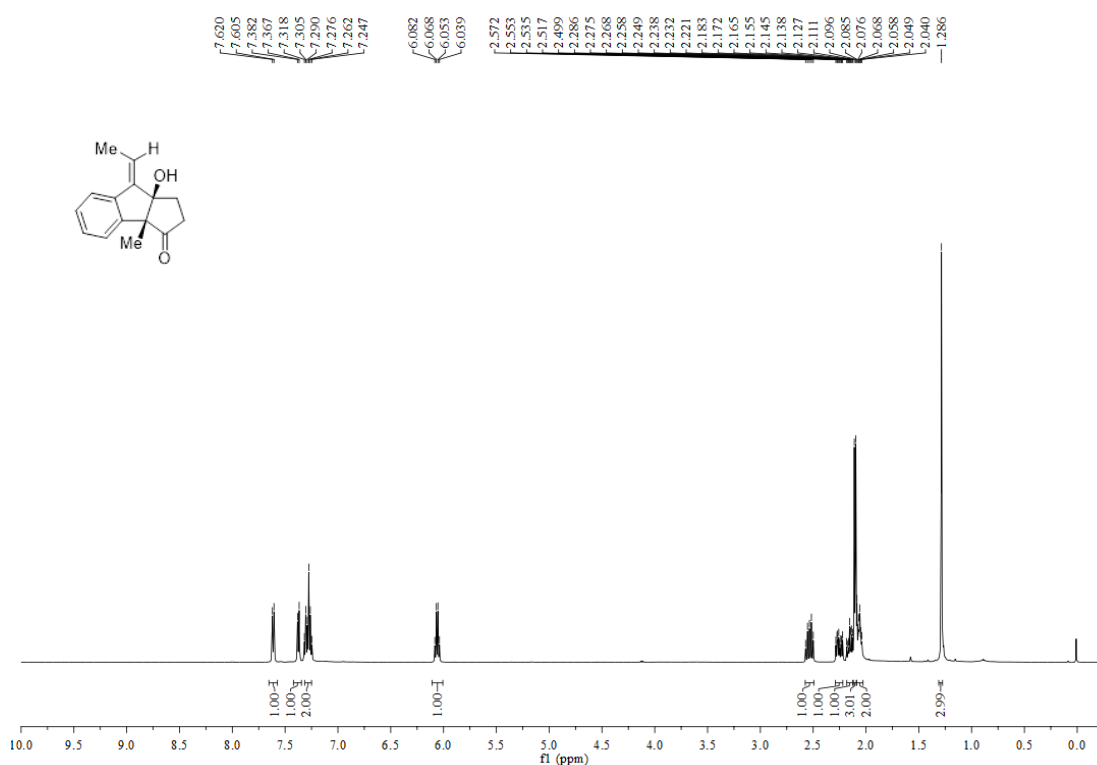

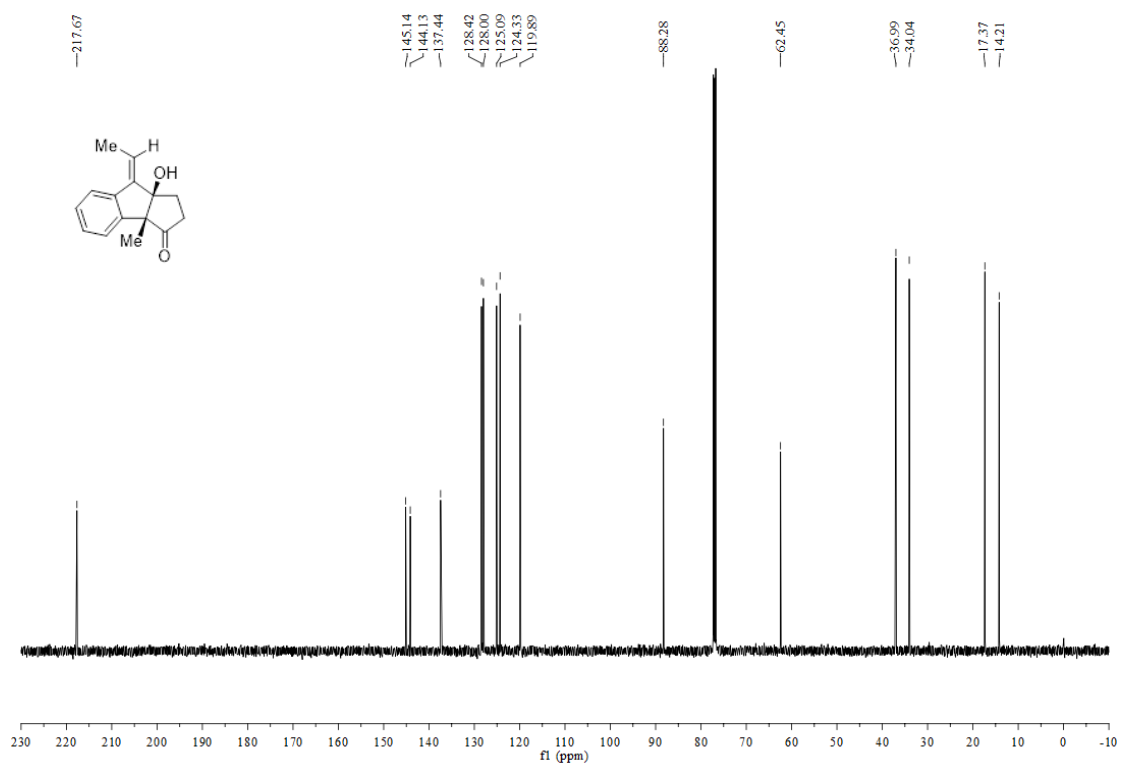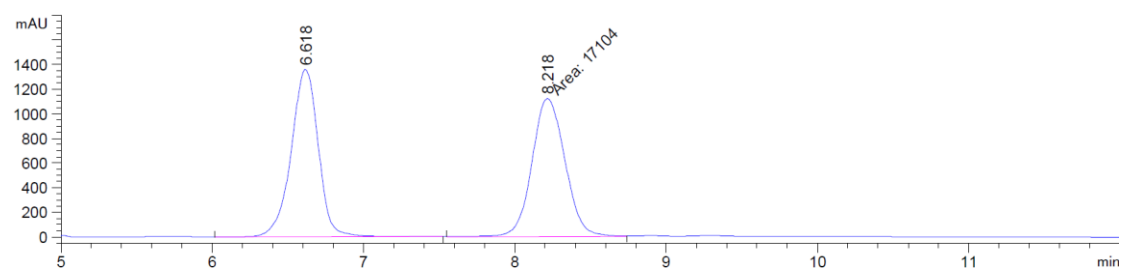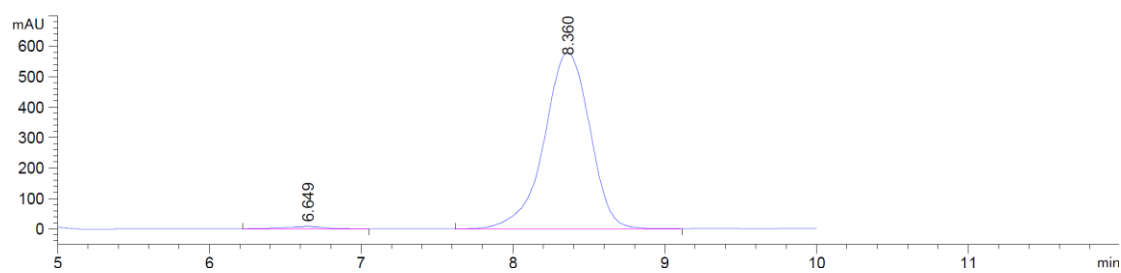

Signal 1: DAD1 A, Sig=254,4 Ref=360,100

| Peak # | RetTime [min] | Type | Width [min] | Area [mAU*s] | Height [mAU] | Area %  |
|--------|---------------|------|-------------|--------------|--------------|---------|
| 1      | 6.649         | BB   | 0.2522      | 115.57787    | 6.73638      | 0.9513  |
| 2      | 8.360         | BB   | 0.3268      | 1.20338e4    | 578.24561    | 99.0487 |



**(3*a*R,8*a*R,E)**-8*a*-Hydroxy-3*a*-methyl-8-(2-phenylethylidene)-1,3*a*,8,8*a*-tetrahydro-cyclopenta[*a*]inden-3(2*H*)-one (2*p*)

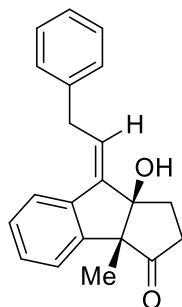

Purified by chromatography on silica gel, eluting with ethyl acetate/petroleum ether 1:5 (v/v); yellow oil; 55 mg, 89% yield;  $[\alpha]_D^{20} = -135.4$  ( $c$  0.5,  $\text{CH}_2\text{Cl}_2$ ), 94% ee [Phenomenex Lux 5u Amylose-2 column (25 cm  $\times$  0.46 cm ID),  $n$ -hexane/ $i$ -PrOH = 80/20, 0.8 mL/min, 254 nm;  $t_{\text{minor}} = 6.3$  min,  $t_{\text{major}} = 7.0$  min];  $^1\text{H}$  NMR (500 MHz,  $\text{CDCl}_3$ )  $\delta$  7.64-7.63 (m, 1H), 7.39-7.37 (m, 1H), 7.33-7.28 (m, 3H), 7.27-7.21 (m, 4H), 6.10 (t,  $J = 7.5$  Hz, 1H), 3.87 (dd,  $J = 8.0, 4.0$  Hz, 2H), 2.58-2.50 (m, 1H), 2.29-2.22 (m, 1H), 2.19-2.14 (m, 1H), 2.11 (s, 1H), 2.09-2.05 (m, 1H), 1.28 (s, 3H).  $^{13}\text{C}$  NMR (125 MHz,  $\text{CDCl}_3$ )  $\delta$  217.6, 145.1, 144.4, 140.2, 136.9, 128.9, 128.7, 128.3, 128.2, 126.3, 124.9, 124.5, 124.0, 88.4, 62.6, 37.0, 34.5, 34.1, 17.5. HRMS  $m/z$  (ESI $^+$ ): Calculated for  $\text{C}_{21}\text{H}_{20}\text{NaO}_2^+$  ( $[\text{M}+\text{Na}]^+$ ) 327.1356, found 327.1354.

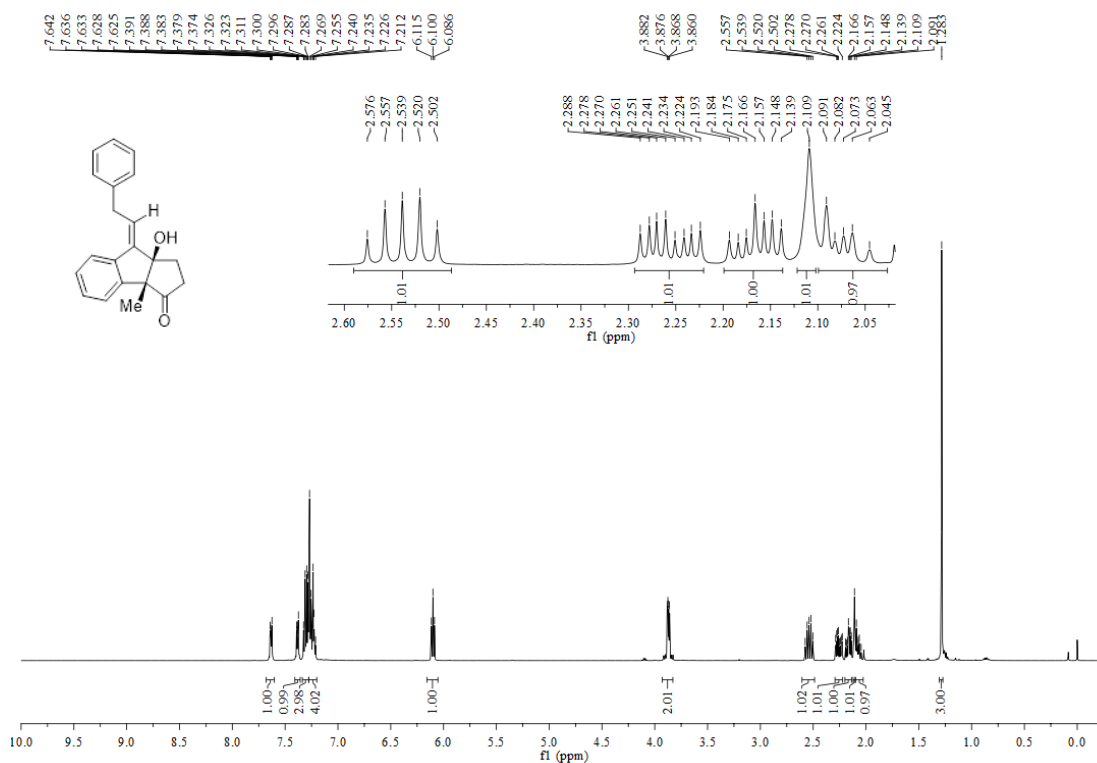

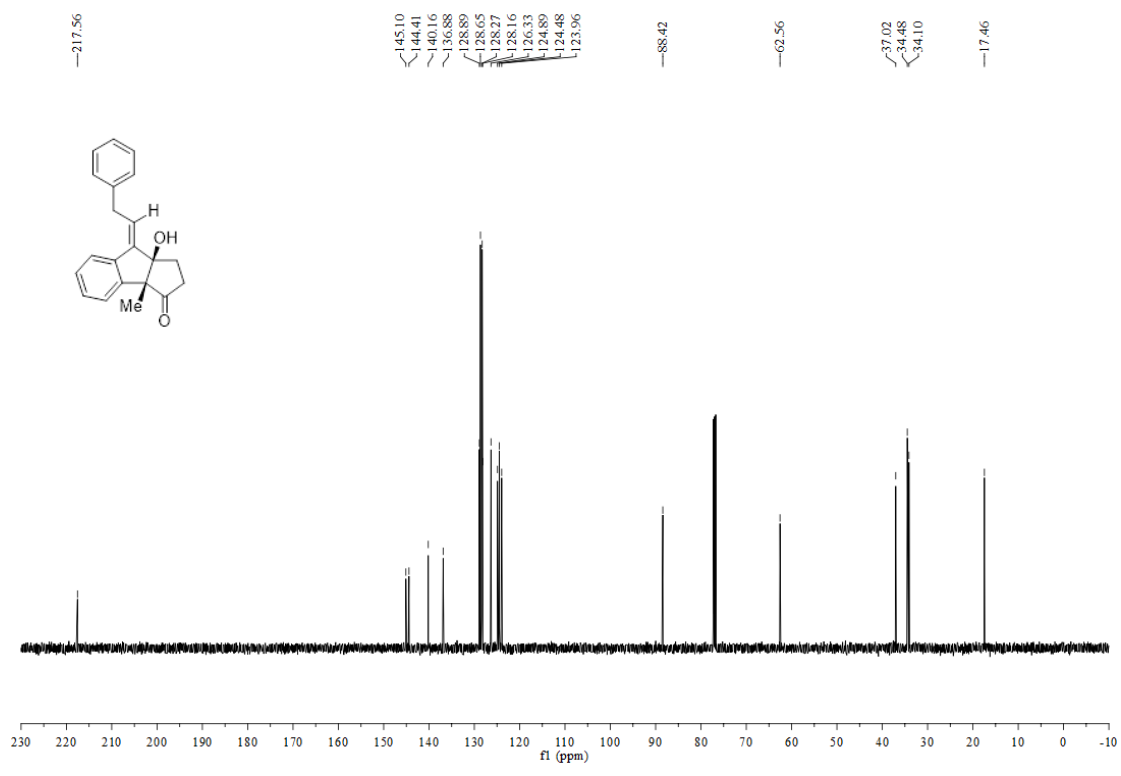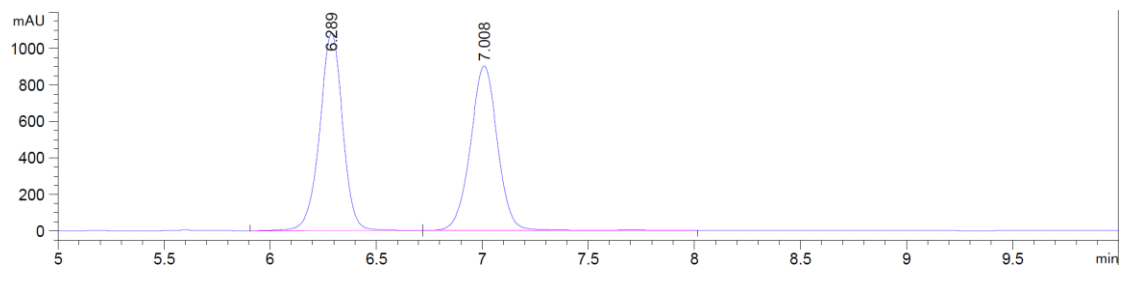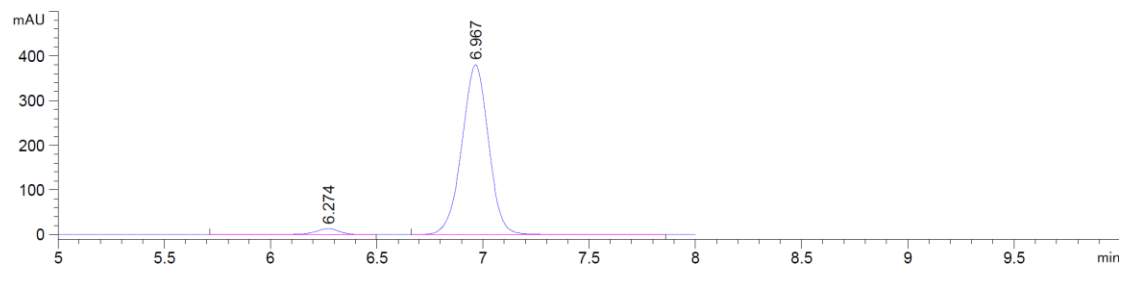

Signal 1: DAD1 A, Sig=254,4 Ref=360,100

| Peak # | RetTime [min] | Type | Width [min] | Area [mAU*s] | Height [mAU] | Area %  |
|--------|---------------|------|-------------|--------------|--------------|---------|
| 1      | 6.274         | BB   | 0.1212      | 110.44466    | 13.53184     | 3.2180  |
| 2      | 6.967         | BB   | 0.1339      | 3321.69019   | 380.47672    | 96.7820 |

**(3*aR*,8*aR*,*E*)-8*a*-Hydroxy-3*a*-methyl-8-(2-phenoxyethylidene)-1,3*a*,8,8*a*-tetrahydro-cyclopenta[*a*]inden-3(2*H*)-one (2*q*)**

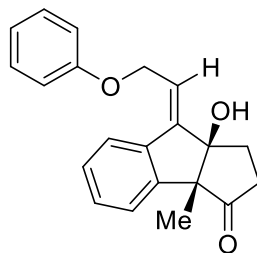

Purified by chromatography on silica gel, eluting with ethyl acetate/petroleum ether 1:5 (v/v); white solid, Mp = 56-57 °C; 53 mg, 83% yield;  $[\alpha]_D^{20} = -148.4$  (*c* 0.5, CH<sub>2</sub>Cl<sub>2</sub>), 90% ee [Phenomenex Lux 5u Amylose-2 column (25 cm × 0.46 cm ID), *n*-hexane/*i*-PrOH = 90/10, 0.7 mL/min, 254 nm; *t*<sub>minor</sub> = 12.4 min, *t*<sub>major</sub> = 14.8 min]; <sup>1</sup>H NMR (600 MHz, CDCl<sub>3</sub>) δ 7.42 (d, *J* = 18.0 Hz, 2H), 7.33-7.28 (m, 4H), 6.99-6.94 (m, 3H), 6.20 (t, *J* = 6.0 Hz, 1H), 5.04-4.98 (m, 2H), 2.59-2.55 (m, 1H), 2.31-2.26 (m, 1H), 2.22-2.18 (m, 1H), 2.12-2.06 (m, 2H), 1.29 (s, 3H). <sup>13</sup>C NMR (150 MHz, CDCl<sub>3</sub>) δ 217.1, 158.3, 147.7, 144.8, 136.0, 129.60, 129.55, 128.4, 125.6, 124.6, 121.1, 120.4, 114.8, 88.3, 64.7, 62.8, 37.0, 34.0, 17.6. HRMS *m/z* (ESI<sup>+</sup>): Calculated for C<sub>21</sub>H<sub>20</sub>NaO<sub>3</sub><sup>+</sup> ([M+Na]<sup>+</sup>) 343.1305, found 343.1303.

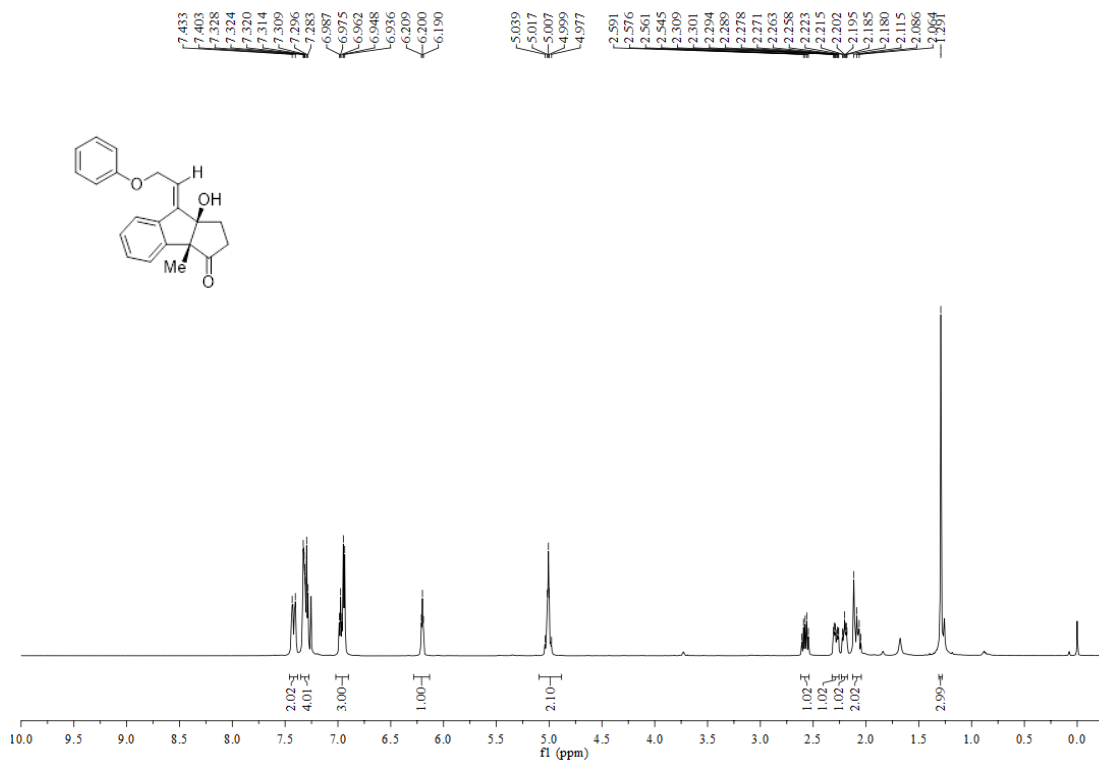

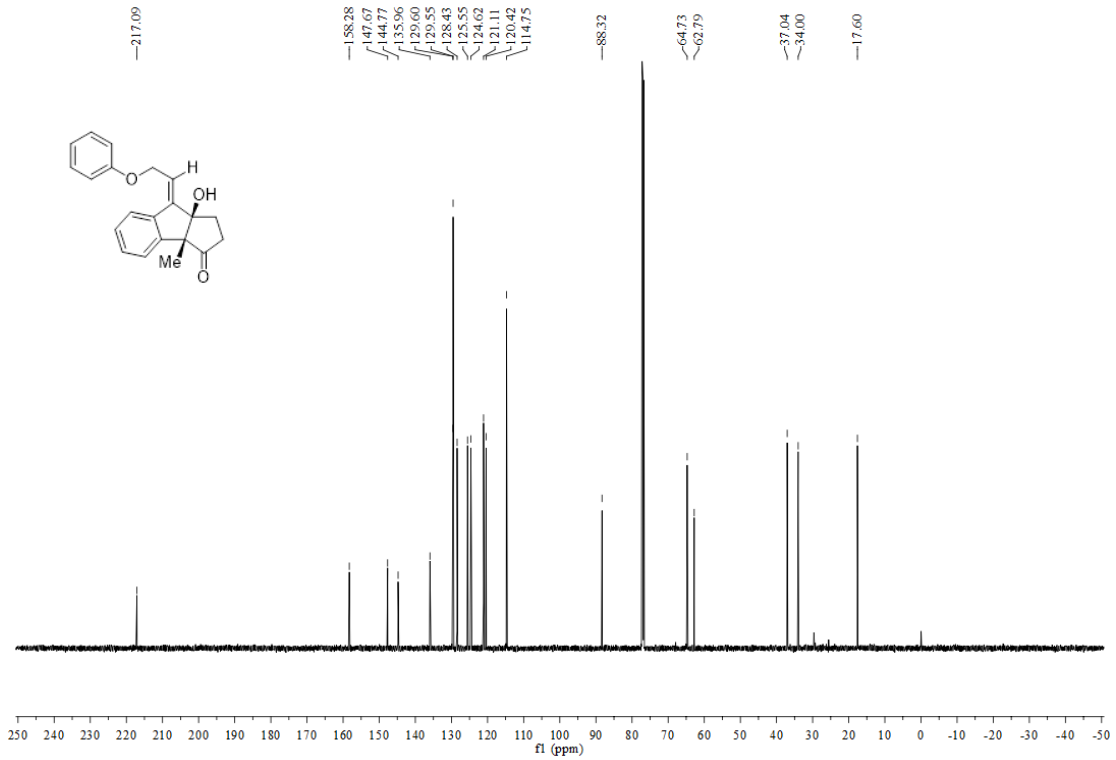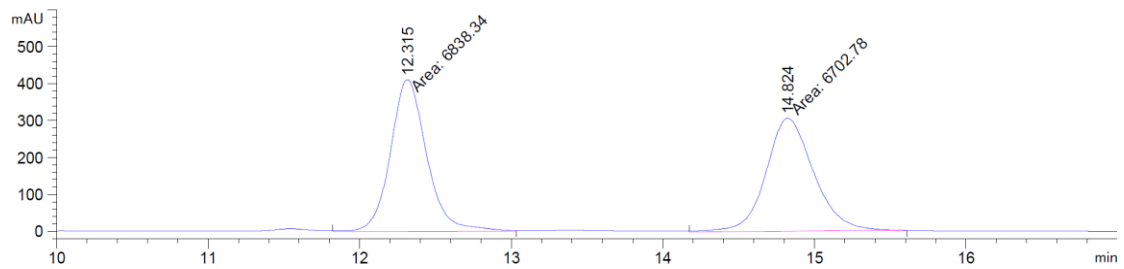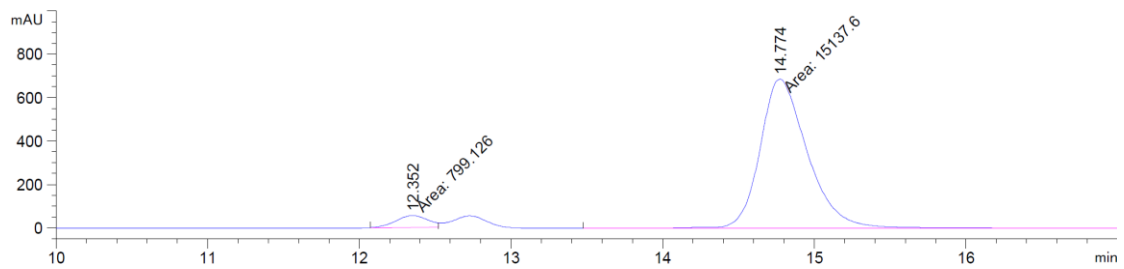

Signal 1: DAD1 A, Sig=254,4 Ref=360,100

| Peak # | RetTime [min] | Type | Width [min] | Area [mAU*s] | Height [mAU] | Area %  |
|--------|---------------|------|-------------|--------------|--------------|---------|
| 1      | 12.352        | MM   | 0.2442      | 799.12573    | 54.53733     | 5.0144  |
| 2      | 14.774        | MM   | 0.3668      | 1.51376e4    | 687.77661    | 94.9856 |

**(3*aR*,8*aR*,*E*)-8-(2,2-Diethoxyethylidene)-8*a*-hydroxy-3*a*-methyl-1,3*a*,8,8*a*-tetrahydrocyclopenta[*a*]inden-3(2*H*)-one (2*r*)**

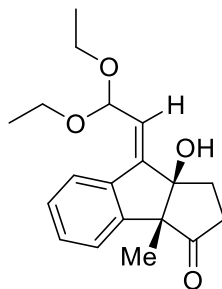

Purified by chromatography on silica gel, eluting with ethyl acetate/petroleum ether 1:5 (v/v); yellow oil; 54 mg, 85% yield;  $[\alpha]_D^{20} = -61.2$  (*c* 0.5, CH<sub>2</sub>Cl<sub>2</sub>), 89% ee [Phenomenex Lux 5u Amylose-2 column (25 cm × 0.46 cm ID), *n*-hexane/*i*-PrOH = 90/10, 0.7 mL/min, 254 nm;  $t_{\text{minor}} = 7.0$  min,  $t_{\text{major}} = 7.7$  min]; <sup>1</sup>H NMR (500 MHz, (CD<sub>3</sub>)<sub>2</sub>SO)  $\delta$  7.61 (d, *J* = 7.0 Hz, 1H), 7.28-7.23 (m, 2H), 7.17 (d, *J* = 8.5 Hz, 1H), 5.81 (d, *J* = 6.0 Hz, 1H), 5.54 (s, 1H), 5.46 (d, *J* = 6.0 Hz, 1H), 3.59-3.50 (m, 3H), 3.48-3.43 (m, 1H), 2.43-2.39 (m, 1H), 2.20-2.14 (m, 1H), 2.08-2.03 (m, 1H), 1.90-1.84 (m, 1H), 1.10-1.05 (m, 9H). <sup>13</sup>C NMR (125 MHz, (CD<sub>3</sub>)<sub>2</sub>SO)  $\delta$  218.1, 149.0, 146.0, 136.9, 130.1, 129.1, 127.0, 124.7, 122.9, 98.3, 88.0, 63.3, 61.2, 59.7, 37.4, 35.5, 19.0, 16.4, 16.1. HRMS *m/z* (ESI<sup>+</sup>): Calculated for C<sub>19</sub>H<sub>24</sub>NaO<sub>4</sub><sup>+</sup> ([M+Na]<sup>+</sup>) 339.1567, found 339.1565.

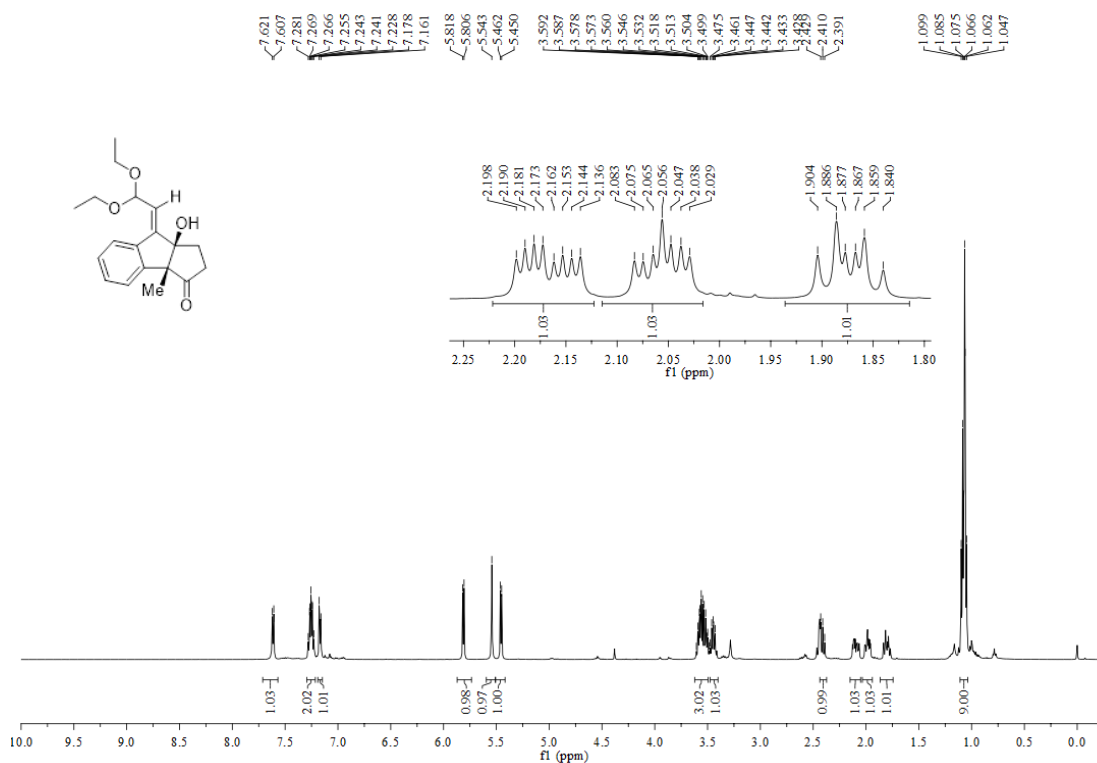

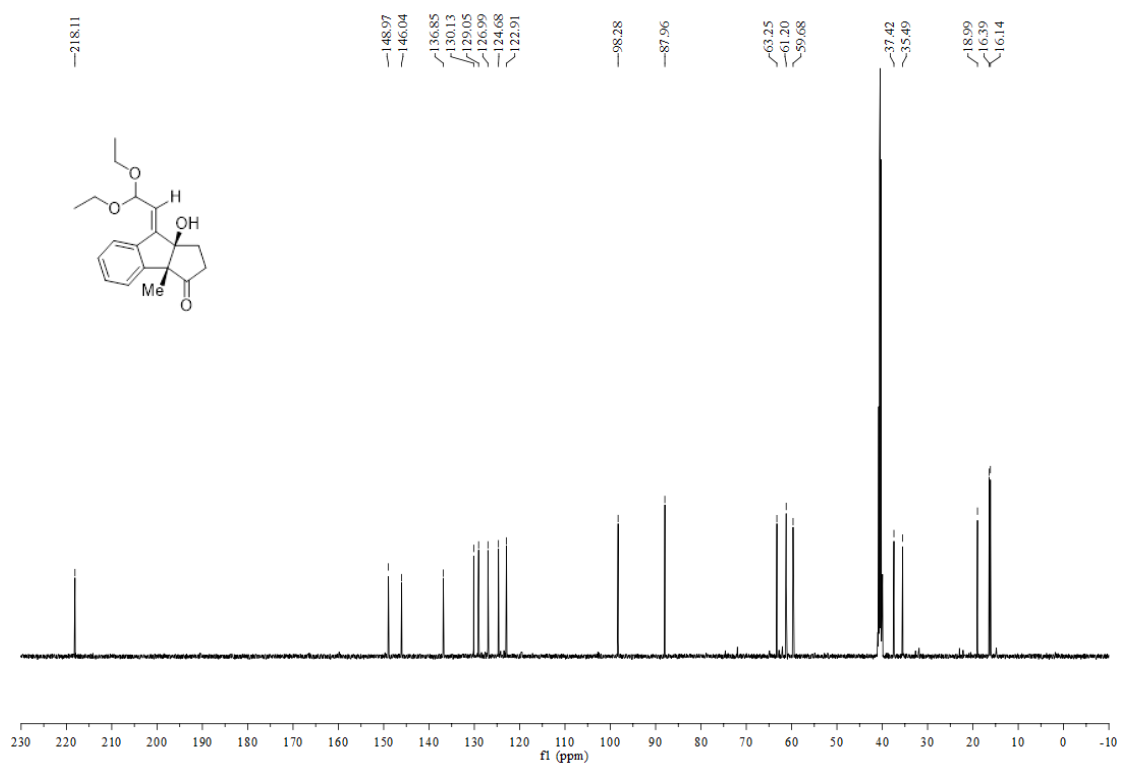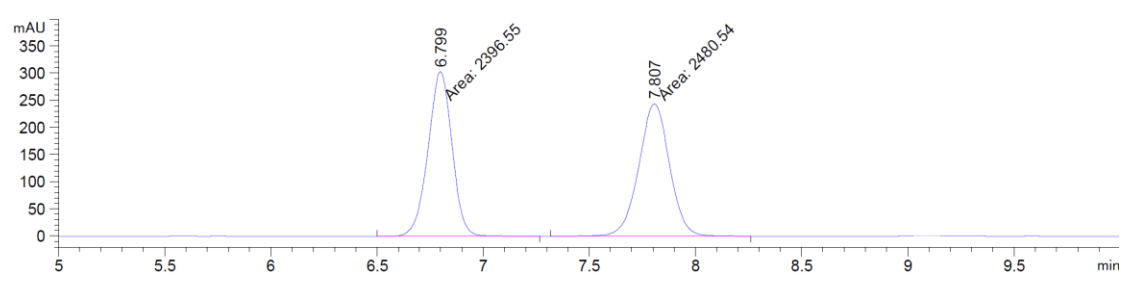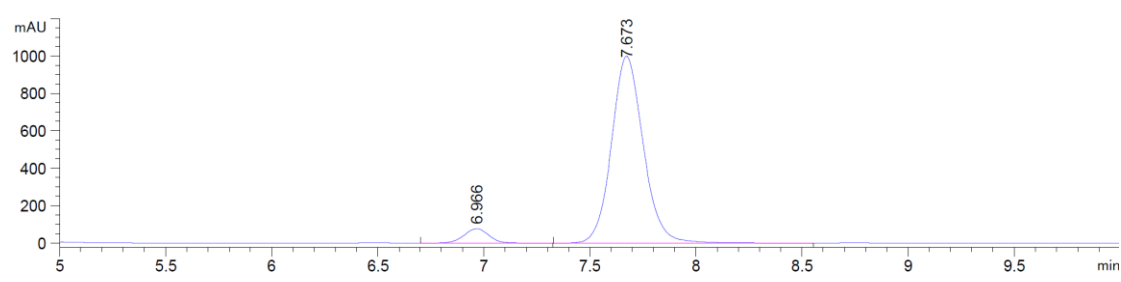

Signal 1: DAD1 A, Sig=254,4 Ref=360,100

| Peak # | RetTime [min] | Type | Width [min] | Area [mAU*s] | Height [mAU] | Area %  |
|--------|---------------|------|-------------|--------------|--------------|---------|
| 1      | 6.966         | MF   | 0.1358      | 635.32983    | 77.97868     | 5.7367  |
| 2      | 7.673         | MM   | 0.1738      | 1.04395e4    | 1000.98065   | 94.2633 |

**(3*aR*,8*aR*,*E*)-8-(3-(Benzyloxy)propylidene)-8*a*-hydroxy-3*a*-methyl-1,3*a*,8,8*a*-tetrahydrocyclopenta[*a*]inden-3(2*H*)-one (2*s*)**

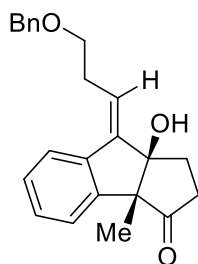

Purified by chromatography on silica gel, eluting with ethyl acetate/petroleum ether 1:5 (v/v); yellow oil; 41 mg, 59% yield;  $[\alpha]_D^{20} = -145.2$  (*c* 0.5, CH<sub>2</sub>Cl<sub>2</sub>), 98% ee [Phenomenex Lux 5u Amylose-2 column (25 cm × 0.46 cm ID), *n*-hexane/*i*-PrOH = 90/10, 0.7 mL/min, 254 nm; *t*<sub>minor</sub> = 12.0 min, *t*<sub>major</sub> = 13.8 min]; <sup>1</sup>H NMR (400 MHz, CDCl<sub>3</sub>) δ 7.58-7.54 (m, 1H), 7.37-7.35 (m, 1H), 7.34-7.31 (m, 4H), 7.30-7.28 (m, 1H), 7.27-7.25 (m, 2H), 5.95 (t, *J* = 6.8 Hz, 1H), 4.54 (s, 2H), 3.66 (t, *J* = 6.8 Hz, 2H), 2.83 (q, *J* = 6.8 Hz, 2H), 2.57-2.48 (m, 1H), 2.31 (s, 1H), 2.26-2.12 (m, 2H), 2.07-2.01 (m, 1H), 1.26 (s, 3H). <sup>13</sup>C NMR (100 MHz, CDCl<sub>3</sub>) δ 217.7, 145.7, 144.3, 138.1, 137.0, 128.7, 128.4, 128.0, 127.7, 125.0, 124.4, 121.7, 88.3, 72.9, 69.4, 62.5, 37.0, 34.1, 28.9, 17.5. HRMS *m/z* (ESI<sup>+</sup>): Calculated for C<sub>23</sub>H<sub>24</sub>NaO<sub>3</sub><sup>+</sup> ([M+Na]<sup>+</sup>) 371.1618, found 371.1615.

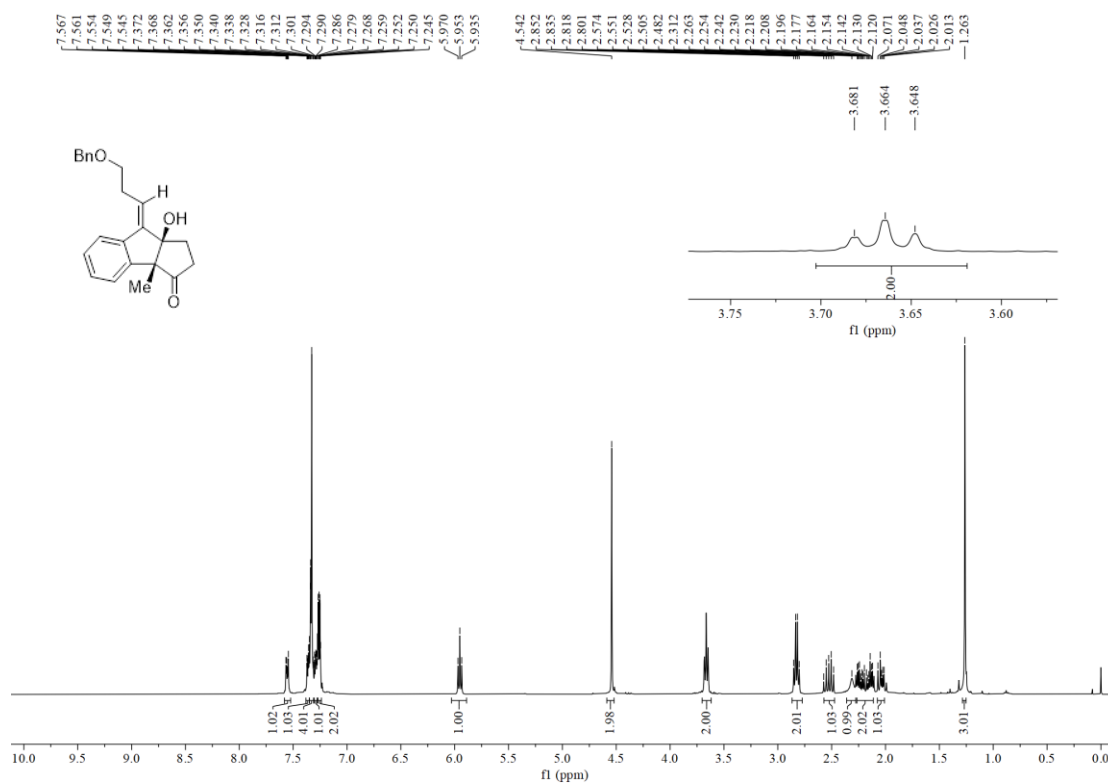

— 41.1.1

145.67  
146.28  
136.06  
138.67  
128.36  
128.05  
127.67  
124.97  
124.35  
121.70

— 88.25

— 72.90

— 69.40

— 62.48

— 37.00

— 34.10

— 28.94

— 17.50

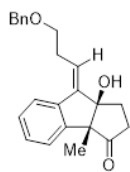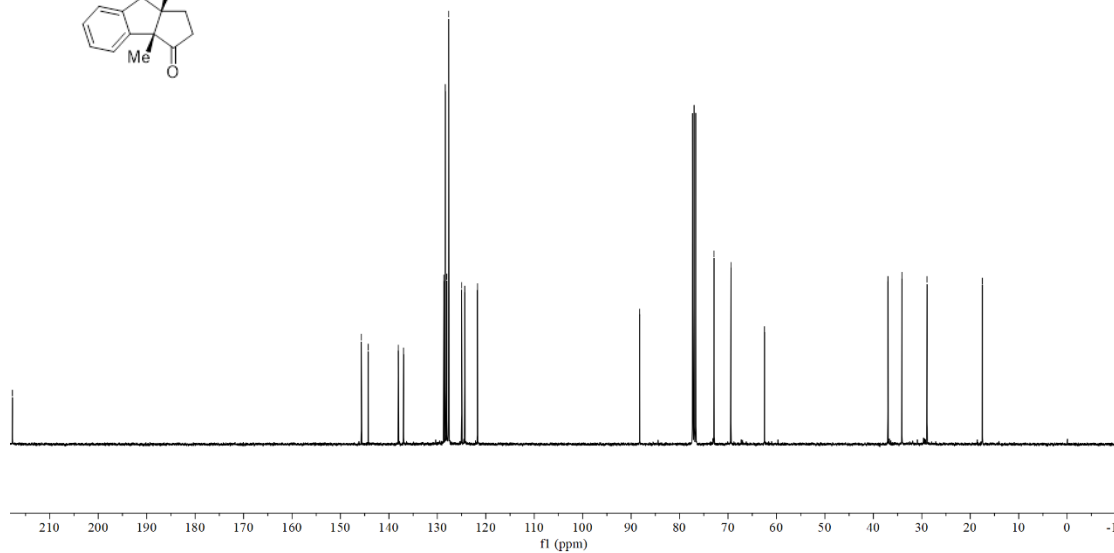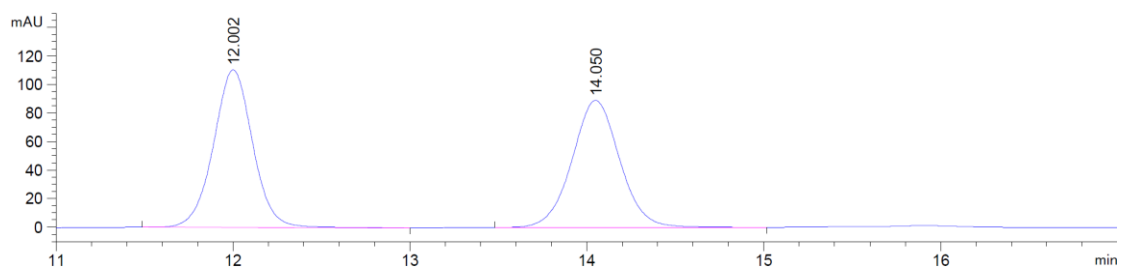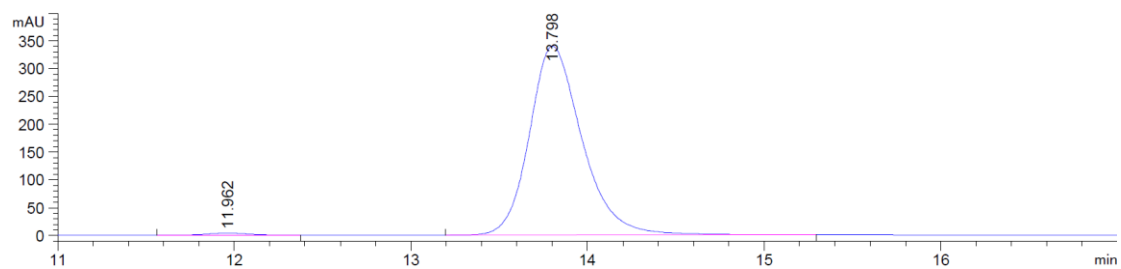

Signal 1: DAD1 A, Sig=254,4 Ref=360,100

| Peak # | RetTime [min] | Type | Width [min] | Area [mAU*s] | Height [mAU] | Area %  |
|--------|---------------|------|-------------|--------------|--------------|---------|
| 1      | 11.962        | BB   | 0.2507      | 59.16324     | 3.65870      | 0.8335  |
| 2      | 13.798        | BB   | 0.3137      | 7038.69678   | 339.68808    | 99.1665 |



**(3*a*R,8*a*R,E)**-8-(3-((*tert*-Butyldimethylsilyl)oxy)propylidene)-8*a*-hydroxy-3*a*-methyl-1,3*a*,8,8*a*-tetrahydrocyclopenta[*a*]inden-3(2*H*)-one (2*t*)

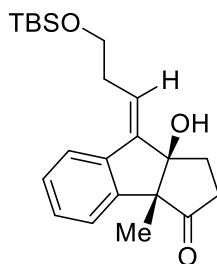

Purified by chromatography on silica gel, eluting with ethyl acetate/petroleum ether 1:5 (v/v); brown oil; 48 mg, 65% yield;  $[\alpha]_D^{20} = -185.3$  (*c* 0.5, CH<sub>2</sub>Cl<sub>2</sub>), 94% ee [Phenomenex Lux 5u Amylose-2 column (25 cm × 0.46 cm ID), *n*-hexane/*i*-PrOH = 90/10, 0.7 mL/min, 254 nm; *t*<sub>minor</sub> = 8.3 min, *t*<sub>major</sub> = 8.9 min]; <sup>1</sup>H NMR (600 MHz, CDCl<sub>3</sub>) δ 7.62 (d, *J* = 7.2 Hz, 1H), 7.36 (dd, *J* = 6.6, 1.2 Hz, 1H), 7.29-7.24 (m, 2H), 5.96 (t, *J* = 7.2 Hz, 1H), 3.86-3.80 (m, 2H), 2.80-2.75 (m, 1H), 2.74-2.69 (m, 1H), 2.56-2.50 (m, 1H), 2.27-2.22 (m, 1H), 2.18-2.13 (m, 1H), 2.08-2.03 (m, 2H), 1.27 (s, 3H), 0.90 (s, 9H), 0.08 (d, *J* = 6.0 Hz, 6H). <sup>13</sup>C NMR (150 MHz, CDCl<sub>3</sub>) δ 217.6, 145.6, 144.2, 137.1, 128.6, 128.0, 125.0, 124.3, 122.1, 88.3, 62.6, 62.5, 37.0, 34.1, 31.9, 25.9, 18.3, 17.4, -5.3. HRMS *m/z* (ESI<sup>+</sup>): Calculated for C<sub>22</sub>H<sub>32</sub>NaO<sub>3</sub>Si<sup>+</sup> ([M+Na]<sup>+</sup>) 395.2013, found 395.2010.

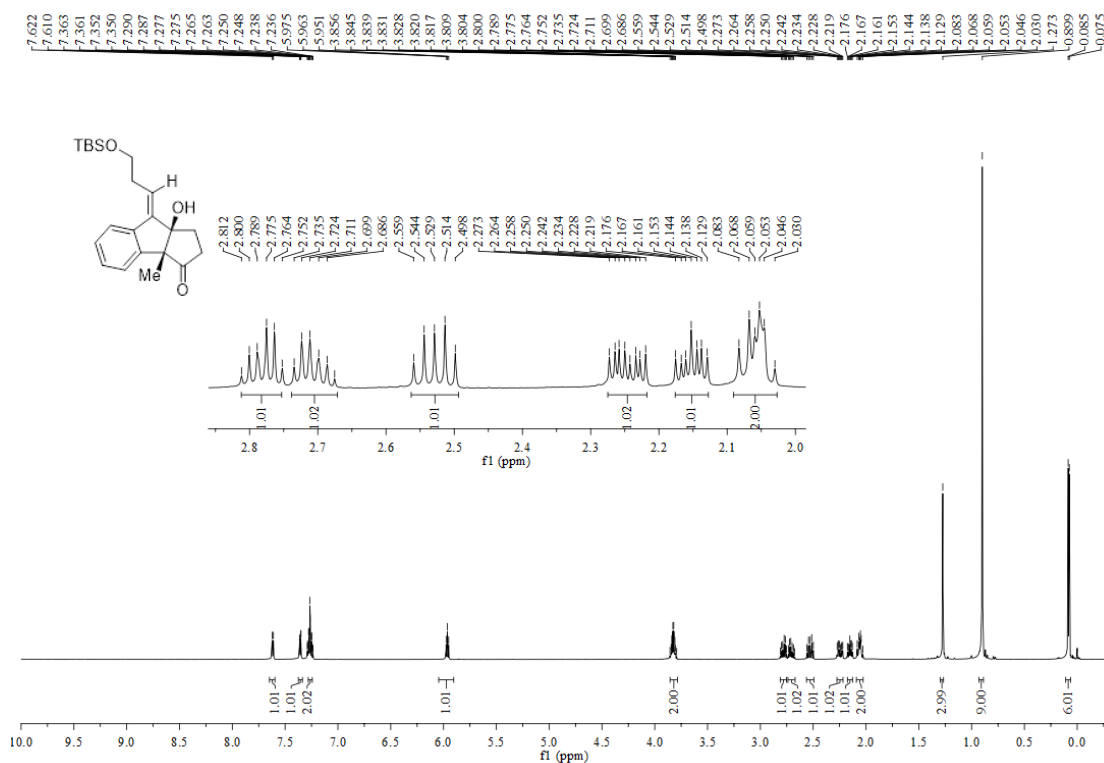

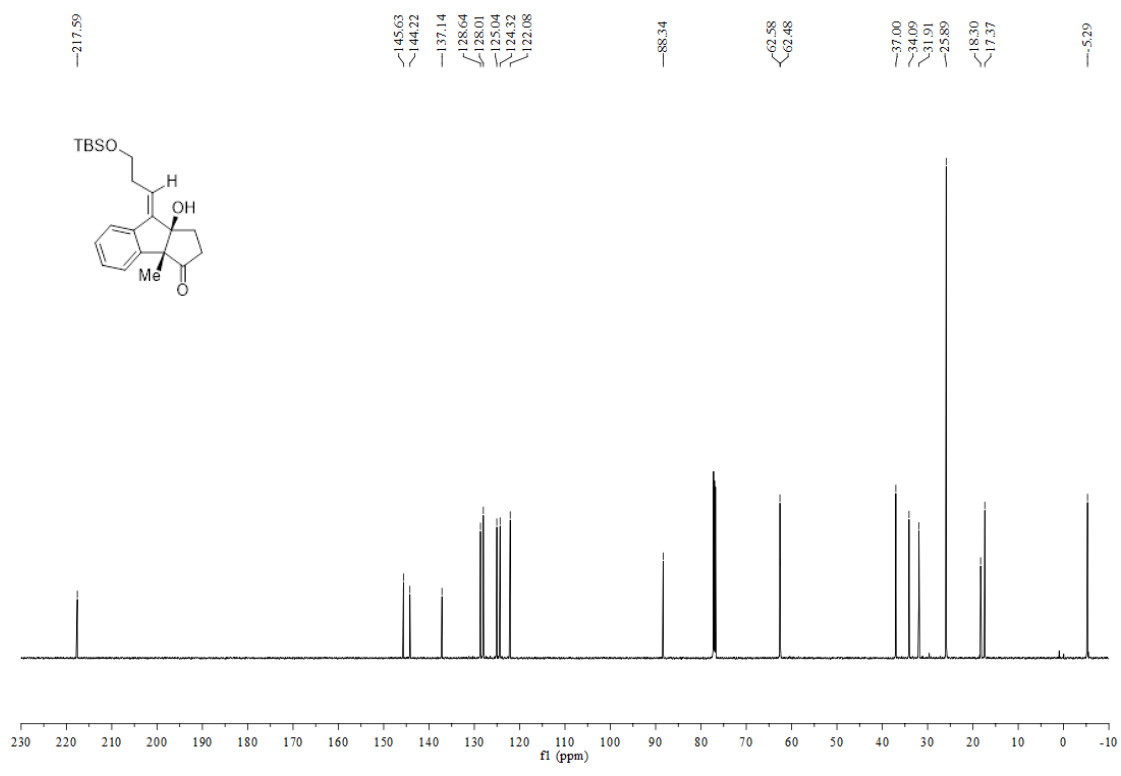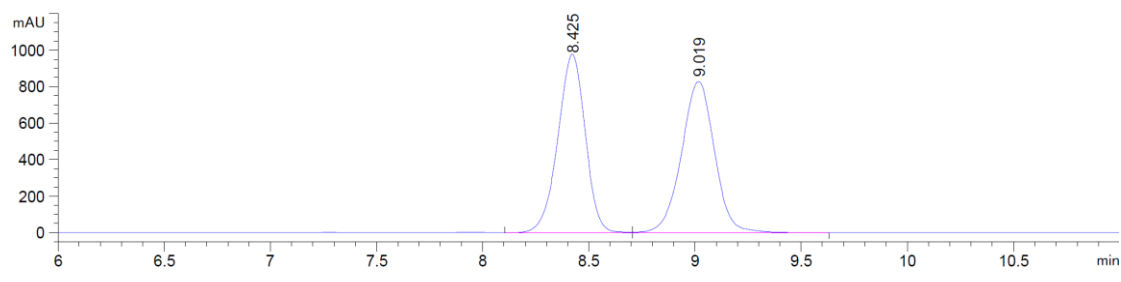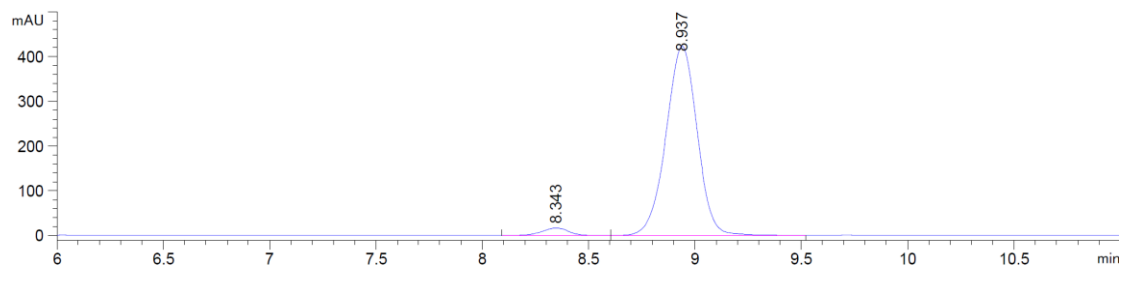

Signal 1: DAD1 A, Sig=254,4 Ref=360,100

| Peak # | RetTime [min] | Type | Width [min] | Area [mAU*s] | Height [mAU] | Area %  |
|--------|---------------|------|-------------|--------------|--------------|---------|
| 1      | 8.343         | BB   | 0.1327      | 143.50595    | 16.62206     | 3.2222  |
| 2      | 8.937         | BB   | 0.1567      | 4310.20654   | 423.55829    | 96.7778 |

**(3*R*,8*aR*,*E*)-8-(4-Chlorobutylidene)-8*a*-hydroxy-3*a*-methyl-1,3*a*,8,8*a*-tetrahydrocyclopenta[*a*]inden-3(2*H*)-one (2*u*)**

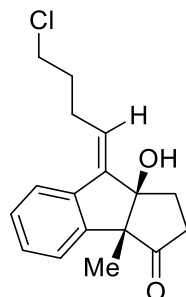

Purified by chromatography on silica gel, eluting with ethyl acetate/petroleum ether 1:5 (v/v); brown oil; 40 mg, 69% yield;  $[\alpha]_D^{20} = -192.2$  (*c* 0.5, CH<sub>2</sub>Cl<sub>2</sub>), 96% ee [Phenomenex Lux 5u Amylose-2 column (25 cm × 0.46 cm ID), *n*-hexane/*i*-PrOH = 90/10, 0.7 mL/min, 254 nm;  $t_{\text{minor}} = 10.1$  min,  $t_{\text{major}} = 11.5$  min]; <sup>1</sup>H NMR (600 MHz, CDCl<sub>3</sub>) δ 7.60 (d, *J* = 7.2 Hz, 1H), 7.37 (dd, *J* = 7.2, 1.2 Hz, 1H), 7.31-7.28 (m, 1H), 7.26-7.25 (m, 1H), 5.90 (t, *J* = 7.2 Hz, 1H), 3.67-3.62 (m, 2H), 2.76-2.64 (m, 2H), 2.57-2.51 (m, 1H), 2.28-2.23 (m, 1H), 2.17-2.13 (m, 1H), 2.08-2.02 (m, 3H), 1.99 (s, 1H), 1.28 (s, 3H). <sup>13</sup>C NMR (150 MHz, CDCl<sub>3</sub>) δ 217.4, 145.4, 144.3, 136.9, 128.8, 128.2, 125.0, 124.4, 123.7, 88.3, 62.5, 44.5, 37.0, 34.2, 32.4, 25.7, 17.5. HRMS *m/z* (ESI<sup>+</sup>): Calculated for C<sub>17</sub>H<sub>19</sub>ClNaO<sub>2</sub><sup>+</sup> ([M+Na]<sup>+</sup>) 313.0966, found 313.0964.

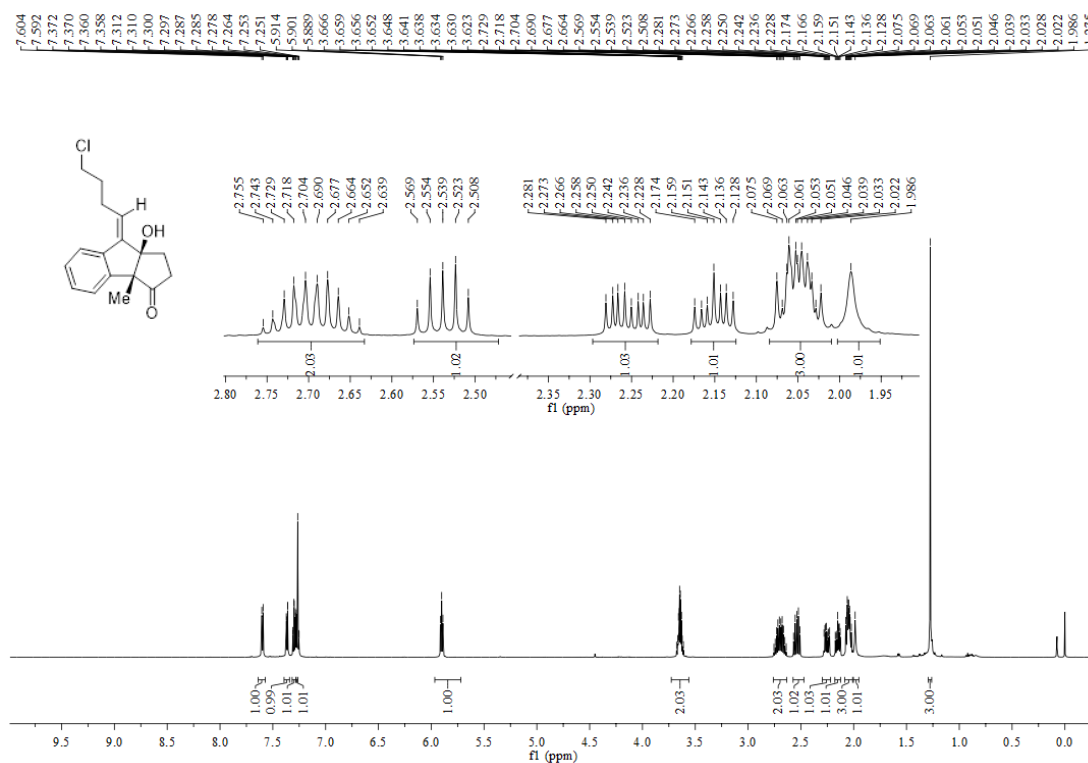

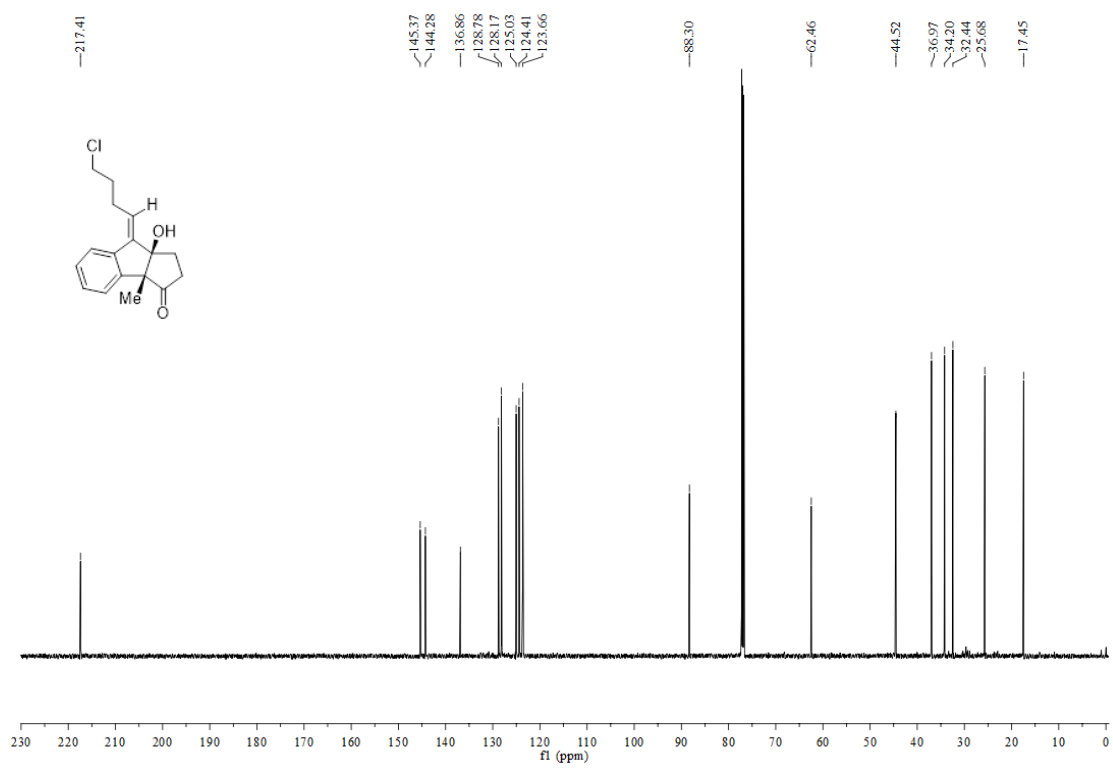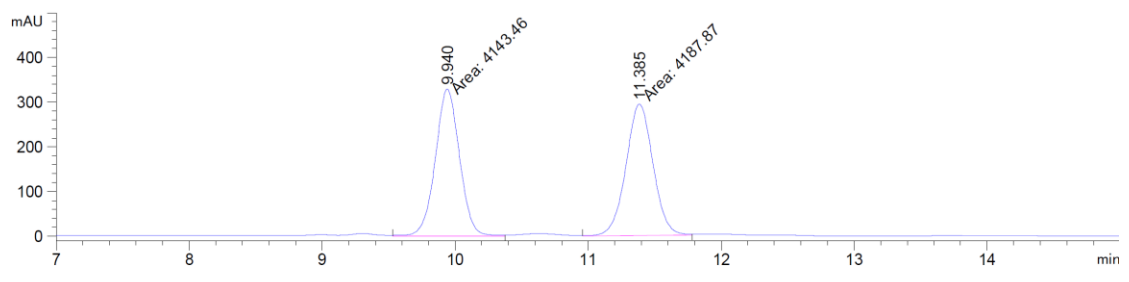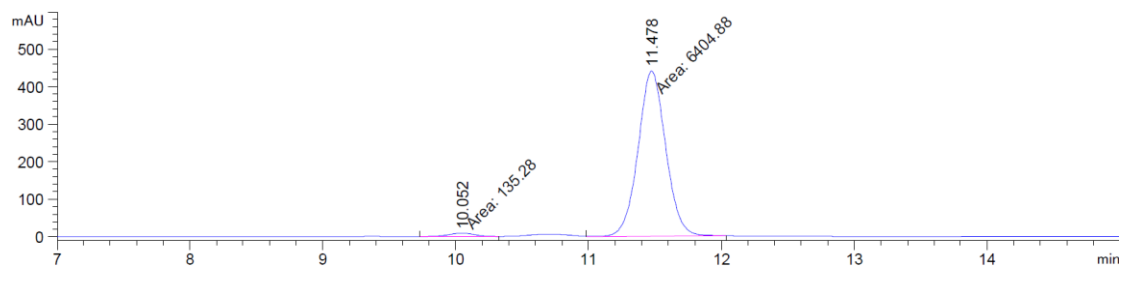

Signal 1: DAD1 A, Sig=254,4 Ref=360,100

| Peak # | RetTime [min] | Type | Width [min] | Area [mAU*s] | Height [mAU] | Area %  |
|--------|---------------|------|-------------|--------------|--------------|---------|
| 1      | 10.052        | MM   | 0.2428      | 135.28043    | 9.28647      | 2.0685  |
| 2      | 11.478        | MM   | 0.2418      | 6404.87549   | 441.40967    | 97.9315 |

**(3*R*,8*aR*,*E*)-8*a*-Hydroxy-8-(3-hydroxypropylidene)-3*a*-methyl-1,3*a*,8,8*a*-tetrahydro-cyclopenta[*a*]inden-3(2*H*)-one (2*v*)**

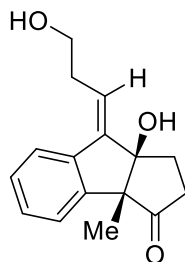

Purified by chromatography on silica gel, eluting with ethyl acetate/petroleum ether 1:5 (v/v); yellow oil; 36 mg, 69% yield;  $[\alpha]_D^{20} = -182.5$  ( $c$  0.5,  $\text{CH}_2\text{Cl}_2$ ), 98% ee [Phenomenex Lux 5u Amylose-2 column (25 cm  $\times$  0.46 cm ID),  $n$ -hexane/ $i$ -PrOH = 80/20, 0.7 mL/min, 254 nm;  $t_{\text{minor}} = 7.2$  min,  $t_{\text{major}} = 8.1$  min];  $^1\text{H}$  NMR (400 MHz,  $\text{CDCl}_3$ )  $\delta$  7.54 (d,  $J = 6.4$  Hz, 1H), 7.35-7.33 (m, 1H), 7.26-7.23 (m, 2H), 5.87 (dd,  $J = 8.8, 5.2$  Hz, 1H), 4.24 (s, 1H), 3.84-3.70 (m, 2H), 3.31 (s, 1H), 2.91-2.84 (m, 1H), 2.62-2.49 (m, 2H), 2.27-2.19 (m, 1H), 2.16-2.09 (m, 1H), 1.99-1.94 (m, 1H), 1.24 (s, 3H).  $^{13}\text{C}$  NMR (100 MHz,  $\text{CDCl}_3$ )  $\delta$  218.5, 146.0, 144.4, 136.9, 128.6, 127.9, 125.0, 124.3, 122.0, 88.4, 62.7, 62.2, 37.1, 34.2, 31.3, 18.0. HRMS  $m/z$  (EI $^+$ ): Calculated for  $\text{C}_{16}\text{H}_{18}\text{O}_3^+$  ( $[\text{M}]^+$ ) 258.1256, found 258.1264.

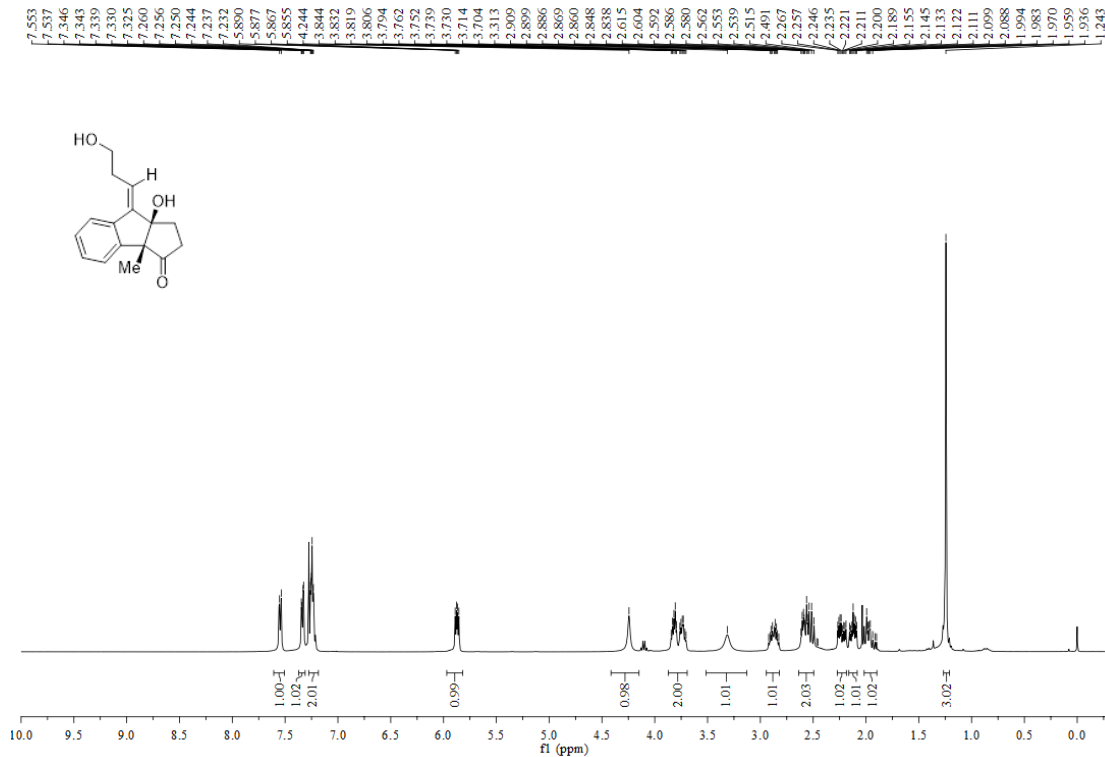

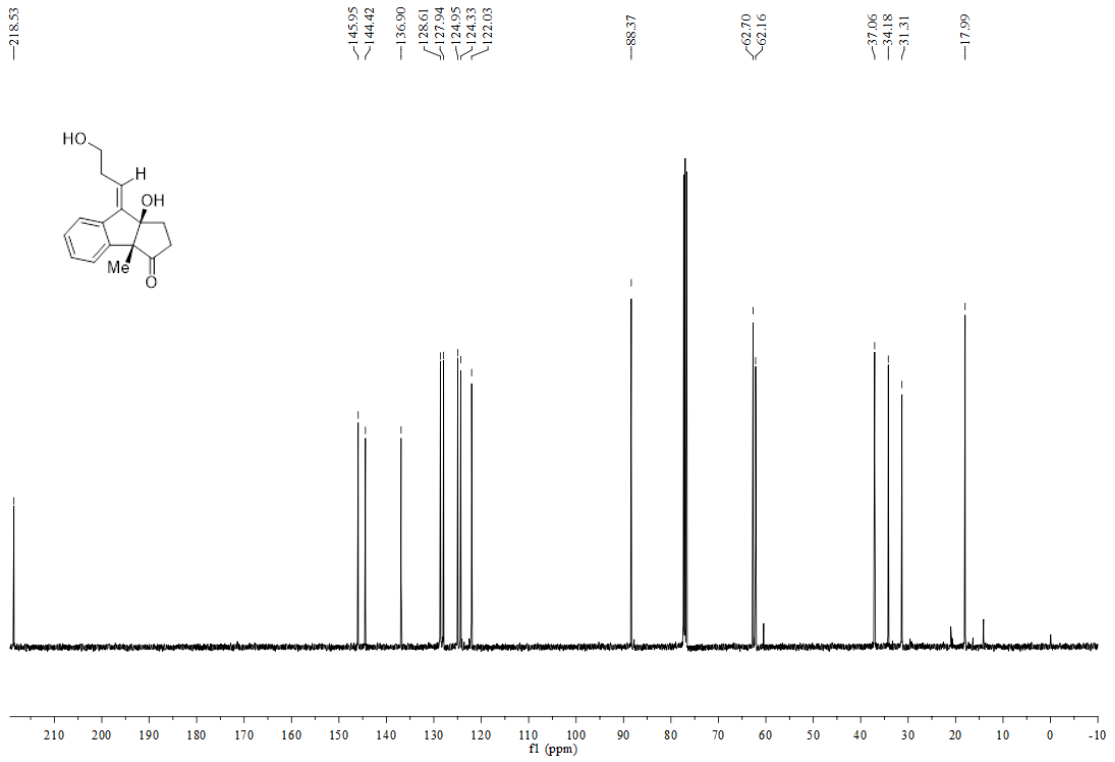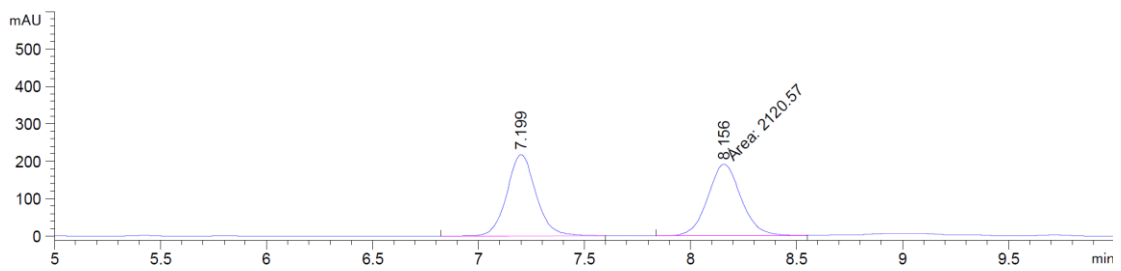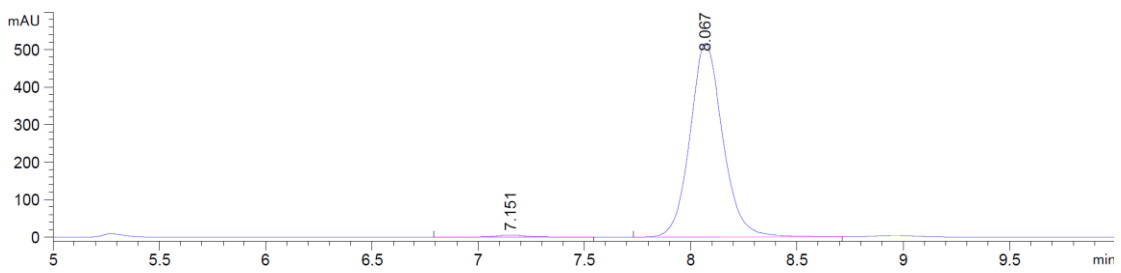

Signal 1: DAD1 A, Sig=254,4 Ref=360,100

| Peak # | RetTime [min] | Type | Width [min] | Area [mAU*s] | Height [mAU] | Area %  |
|--------|---------------|------|-------------|--------------|--------------|---------|
| 1      | 7.151         | BB   | 0.1445      | 52.83349     | 5.47994      | 0.9490  |
| 2      | 8.067         | BB   | 0.1626      | 5514.26465   | 516.26038    | 99.0510 |

**(3*R*,8*aR*,*E*)-8*a*-Hydroxy-3*a*-methyl-8-nonylidene-1,3*a*,8,8*a*-tetrahydrocyclopenta[*a*]inden-3(2*H*)-one (2*w*)**

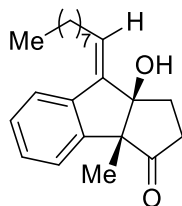

Purified by chromatography on silica gel, eluting with ethyl acetate/petroleum ether 1:5 (v/v); colorless oil; 46 mg, 70% yield;  $[\alpha]_D^{20} = -171.3$  ( $c$  0.5,  $\text{CH}_2\text{Cl}_2$ ), 98% ee [Daicel Chiralcel OJ-H column (25 cm  $\times$  0.46 cm ID),  $n$ -hexane/ $i$ -PrOH = 99/01, 0.7 mL/min, 254 nm;  $t_{\text{minor}} = 15.6$  min,  $t_{\text{major}} = 17.4$  min];  $^1\text{H}$  NMR (500 MHz,  $\text{CDCl}_3$ )  $\delta$  7.56 (d,  $J = 7.5$  Hz, 1H), 7.36 (dd,  $J = 7.3, 1.0$  Hz, 1H), 7.30-7.27 (m, 1H), 7.26-7.23 (m, 1H), 5.94 (t,  $J = 7.5$  Hz, 1H), 2.56-2.46 (m, 3H), 2.27-2.21 (m, 1H), 2.18-2.12 (m, 1H), 2.10-2.04 (m, 1H), 1.96 (s, 1H), 1.59-1.53 (m, 2H), 1.43-1.37 (m, 2H), 1.34-1.28 (m, 11H), 0.88 (t,  $J = 6.9$  Hz, 3H).  $^{13}\text{C}$  NMR (125 MHz,  $\text{CDCl}_3$ )  $\delta$  217.6, 144.2, 144.1, 137.4, 128.5, 128.1, 126.4, 125.0, 124.4, 88.3, 62.5, 37.1, 34.1, 31.9, 29.8, 29.49, 29.47, 29.3, 28.4, 22.7, 17.4, 14.1. HRMS  $m/z$  (ESI $^+$ ): Calculated for  $\text{C}_{22}\text{H}_{31}\text{O}_2^+$  ( $[\text{M}+\text{H}]^+$ ) 327.2319, found 327.2320.

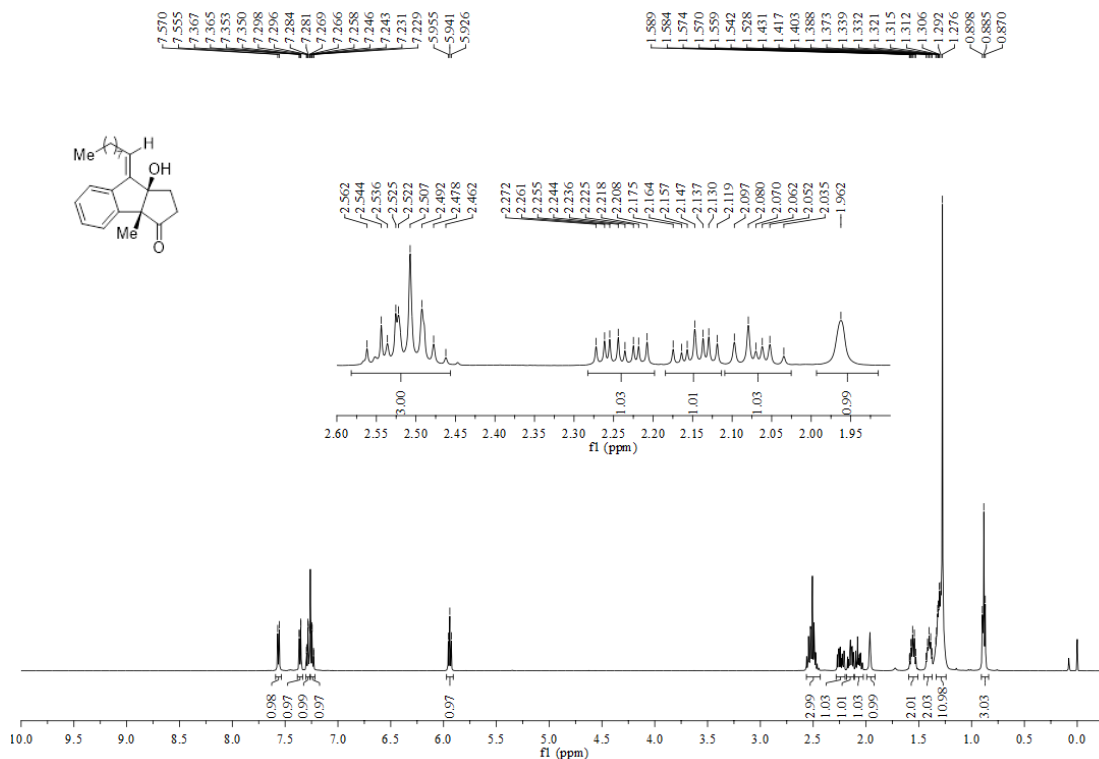

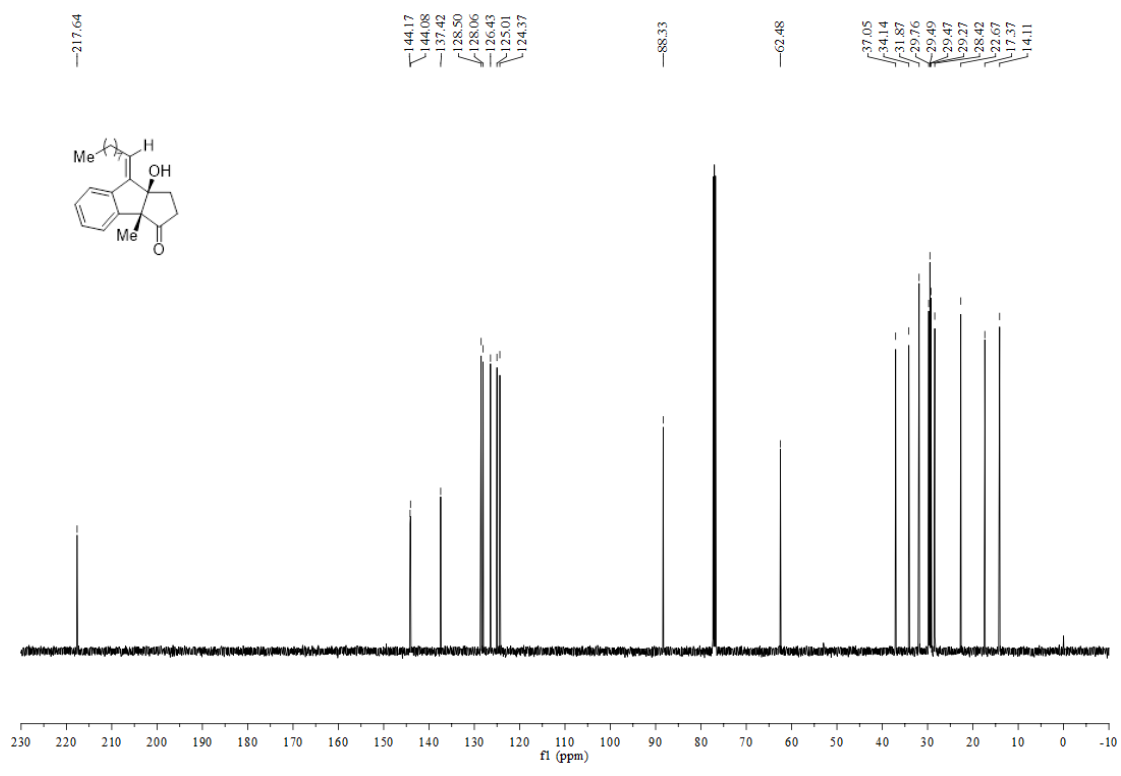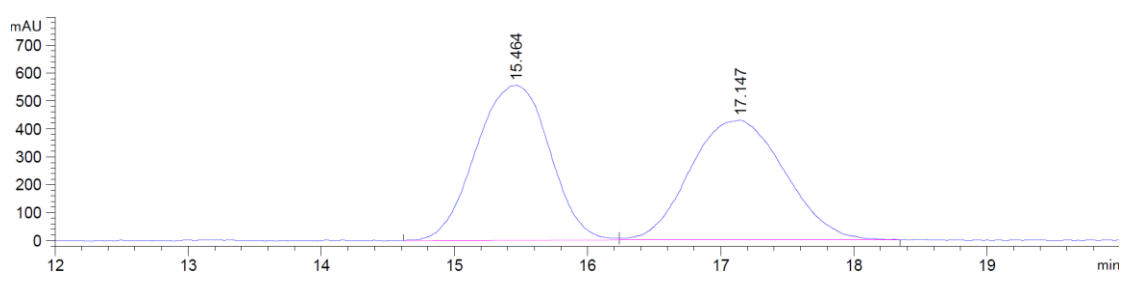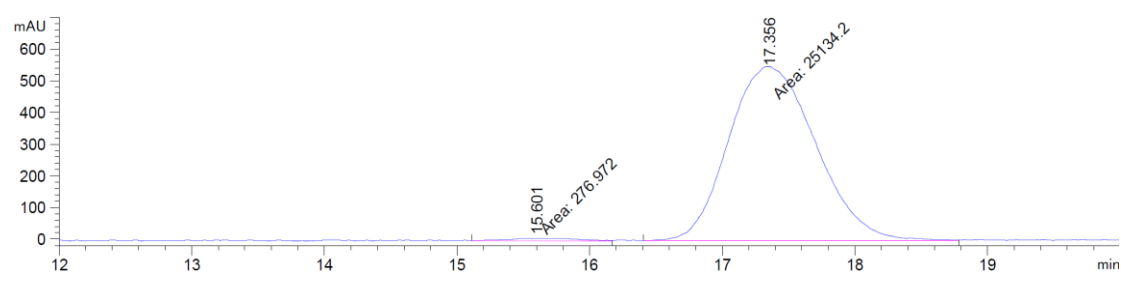

Signal 1: DAD1 A, Sig=254,4 Ref=360,100

| Peak # | RetTime [min] | Type | Width [min] | Area [mAU*s] | Height [mAU] | Area %  |
|--------|---------------|------|-------------|--------------|--------------|---------|
| 1      | 15.601        | MM   | 0.6136      | 276.97174    | 7.52308      | 1.0900  |
| 2      | 17.356        | MM   | 0.7618      | 2.51342e4    | 549.92072    | 98.9100 |



**Benzyl (E)-4-((3aR,8aR)-8a-hydroxy-3a-methyl-3-oxo-2,3,3a,8a-tetrahydrocyclopenta[a]inden-8(1H)-ylidene)butanoate (2x)**

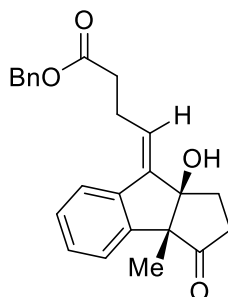

Purified by chromatography on silica gel, eluting with ethyl acetate/petroleum ether 1:5 (v/v); yellow oil; 51 mg, 68% yield;  $[\alpha]_D^{20} = -165.6$  ( $c$  0.5,  $\text{CH}_2\text{Cl}_2$ ), 97% ee [Phenomenex Lux 5u Amylose-2 column (25 cm  $\times$  0.46 cm ID),  $n$ -hexane/ $i$ -PrOH = 80/20, 0.7 mL/min, 254 nm;  $t_{\text{minor}} = 10.0$  min,  $t_{\text{major}} = 12.3$  min];  $^1\text{H}$  NMR (600 MHz,  $\text{CDCl}_3$ )  $\delta$  7.57 (dd,  $J = 6.0, 2.4$  Hz, 1H), 7.37-7.35 (m, 1H), 7.34-7.31 (m, 5H), 7.27-7.25 (m, 2H), 5.86 (t,  $J = 7.2$  Hz, 1H), 5.14-5.09 (m, 2H), 2.87 (q,  $J = 7.2$  Hz, 2H), 2.63-2.60 (m, 2H), 2.55-2.48 (m, 1H), 2.25-2.19 (m, 1H), 2.13-2.09 (m, 1H), 2.02-1.98 (m, 2H), 1.24 (s, 3H).  $^{13}\text{C}$  NMR (150 MHz,  $\text{CDCl}_3$ )  $\delta$  217.4, 172.6, 145.5, 144.4, 136.8, 135.8, 128.8, 128.6, 128.3, 128.20, 128.16, 125.1, 124.4, 123.2, 88.2, 66.4, 62.5, 37.0, 34.2, 34.1, 23.8, 17.4. HRMS  $m/z$  (ESI+): Calculated for  $\text{C}_{24}\text{H}_{24}\text{NaO}_4^+$  ( $[\text{M}+\text{Na}]^+$ ) 399.1567, found 399.1565.

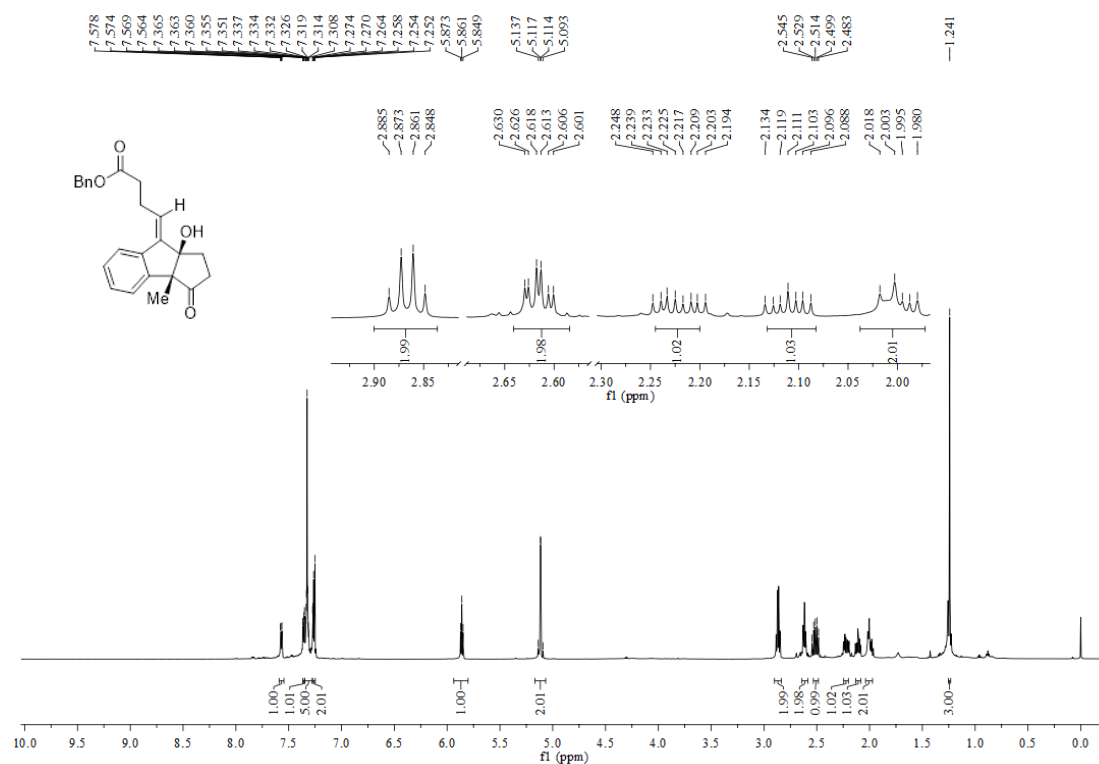

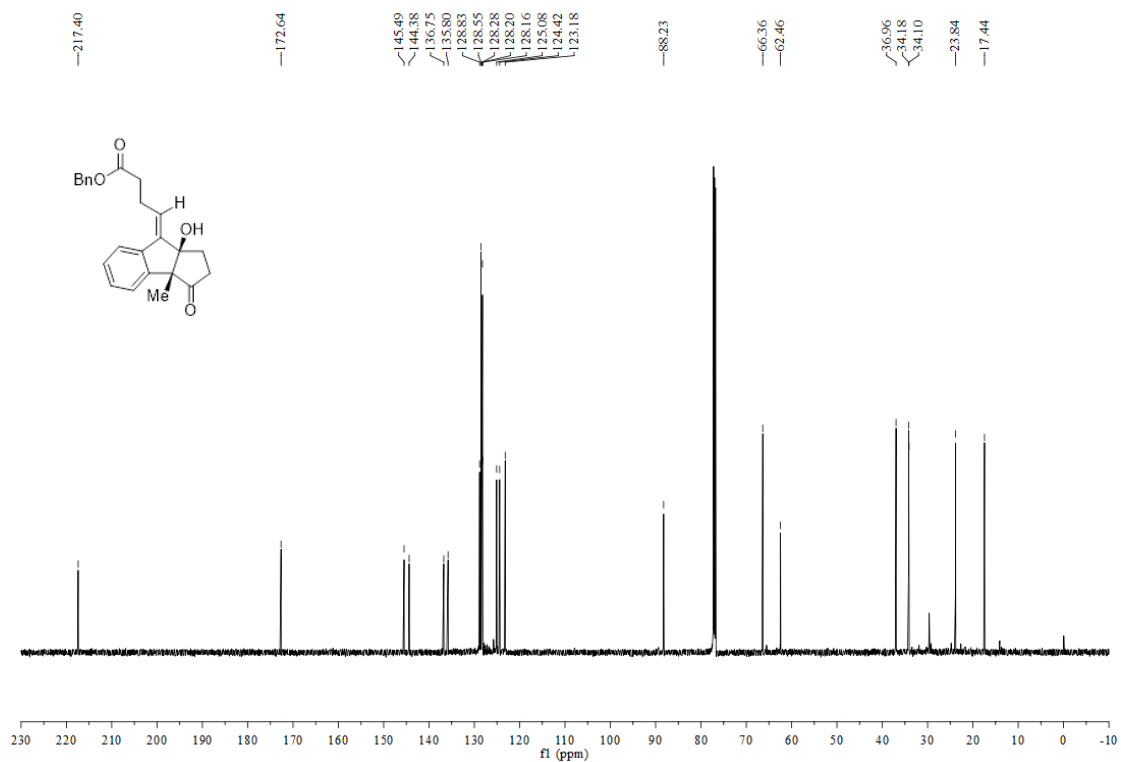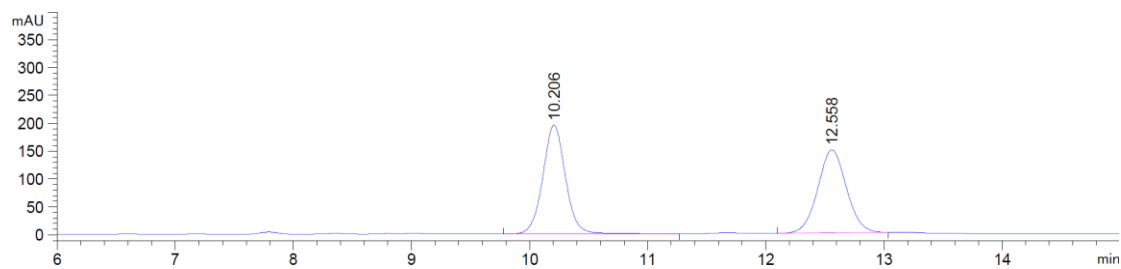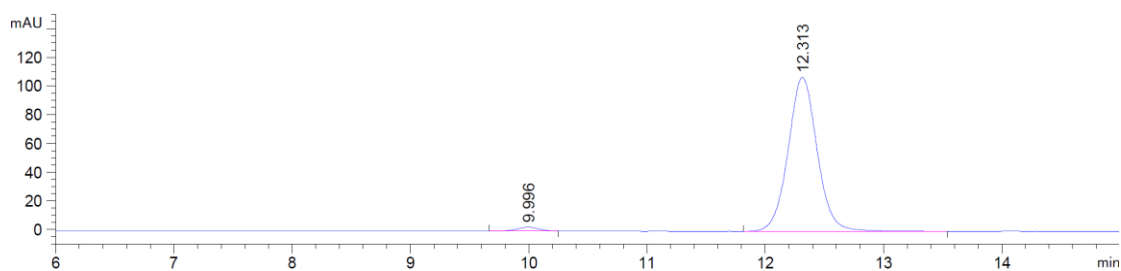

Signal 1: DAD1 A, Sig=254,4 Ref=360,100

| Peak # | RetTime [min] | Type | Width [min] | Area [mAU*s] | Height [mAU] | Area %  |
|--------|---------------|------|-------------|--------------|--------------|---------|
| 1      | 9.996         | BB   | 0.1937      | 32.69878     | 2.65444      | 1.7543  |
| 2      | 12.313        | BB   | 0.2611      | 1831.24036   | 107.32964    | 98.2457 |

**2-((E)-3-((3aR,8aR)-8a-Hydroxy-3a-methyl-3-oxo-2,3,3a,8a-tetrahydrocyclopenta-[a]inden-8(1H)-ylidene)propyl)isoindoline-1,3-dione (2y)**

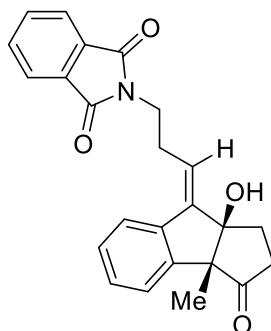

Purified by chromatography on silica gel, eluting with ethyl acetate/petroleum ether 1:5 (v/v); yellow solid, Mp = 63-64 °C; 64 mg, 83% yield;  $[\alpha]_D^{20} = -113.8$  ( $c$  0.5,  $\text{CH}_2\text{Cl}_2$ ), 96% ee [Phenomenex Lux 5u Amylose-2 column (25 cm  $\times$  0.46 cm ID),  $n$ -hexane/ $i$ -PrOH = 80/20, 0.8 mL/min, 254 nm;  $t_{\text{minor}} = 16.6$  min,  $t_{\text{major}} = 23.0$  min];  $^1\text{H}$  NMR (600 MHz,  $\text{CDCl}_3$ )  $\delta$  7.76 (dd,  $J = 4.8, 3.0$  Hz, 2H), 7.67 (dd,  $J = 4.8, 3.0$  Hz, 2H), 7.60 (d,  $J = 7.2$  Hz, 1H), 7.26 (d,  $J = 7.8$  Hz, 1H), 7.22 (t,  $J = 7.2$  Hz, 1H), 7.15 (t,  $J = 7.2$  Hz, 1H), 5.97 (t,  $J = 7.8$  Hz, 1H), 3.91 (t,  $J = 6.0$  Hz, 2H), 3.02-2.96 (m, 1H), 2.88-2.82 (m, 1H), 2.53-2.50 (m, 1H), 2.40 (s, 1H), 2.22-2.13 (m, 2H), 2.01-1.97 (m, 1H), 1.20 (s, 3H).  $^{13}\text{C}$  NMR (150 MHz,  $\text{CDCl}_3$ )  $\delta$  217.5, 168.6, 146.8, 144.4, 136.4, 133.9, 131.8, 128.8, 128.2, 124.8, 124.3, 123.2, 121.0, 88.1, 62.3, 37.5, 36.9, 34.1, 27.8, 17.5. HRMS  $m/z$  (ESI $^+$ ): Calculated for  $\text{C}_{24}\text{H}_{21}\text{NNaO}_4^+$  ( $[\text{M}+\text{Na}]^+$ ) 410.1363, found 410.1360.

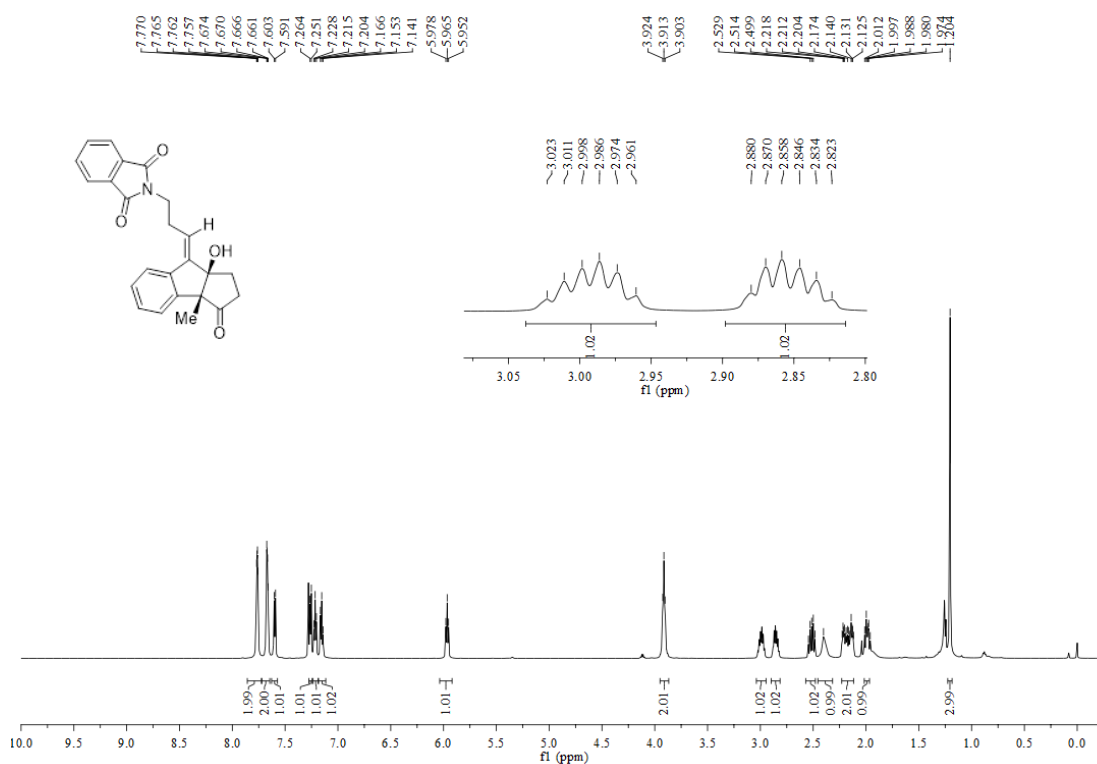

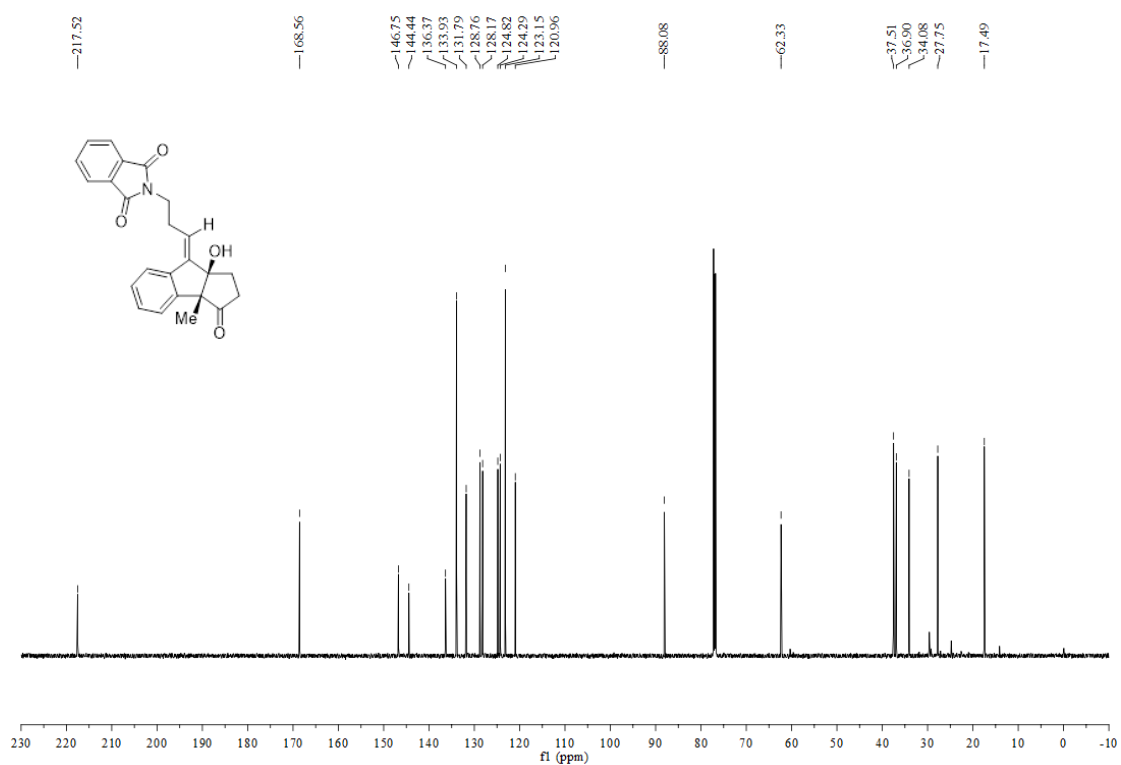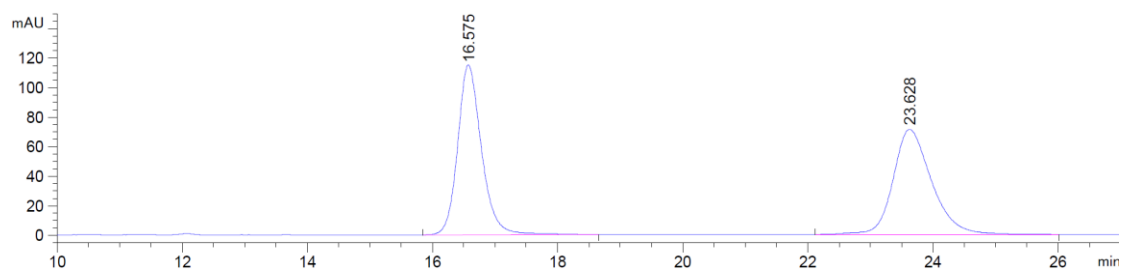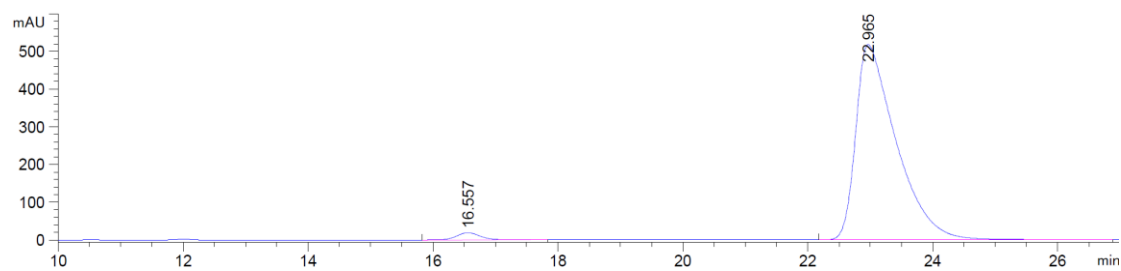

Signal 1: DAD1 A, Sig=254,4 Ref=360,100

| Peak # | RetTime [min] | Type | Width [min] | Area [mAU*s] | Height [mAU] | Area %  |
|--------|---------------|------|-------------|--------------|--------------|---------|
| 1      | 16.557        | BB   | 0.4008      | 500.00568    | 19.13955     | 2.1049  |
| 2      | 22.965        | BB   | 0.6561      | 2.32538e4    | 517.59906    | 97.8951 |

**(3*aR*,8*aR*)-8-((*E*)-Benzylidene)-8*a*-hydroxy-3*a*,5-dimethyl-1,3*a*,8,8*a*-tetrahydro-cyclopenta[*a*]inden-3(2*H*)-one (2*z*)**

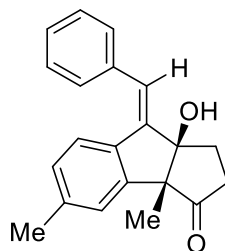

Purified by chromatography on silica gel, eluting with ethyl acetate/petroleum ether 1:5 (v/v); brown solid, Mp = 168-169 °C; 49 mg, 81% yield;  $[\alpha]_D^{20} = -160.2$  ( $c$  0.5,  $\text{CH}_2\text{Cl}_2$ ), 99% ee [Phenomenex Lux 5u Amylose-2 column (25 cm  $\times$  0.46 cm ID),  $n$ -hexane/ $i$ -PrOH = 85/15, 0.7 mL/min, 254 nm;  $t_{\text{minor}} = 6.8$  min,  $t_{\text{major}} = 8.3$  min];  $^1\text{H}$  NMR (500 MHz,  $\text{CDCl}_3$ )  $\delta$  7.42 (d,  $J = 7.0$  Hz, 2H), 7.35 (t,  $J = 7.5$  Hz, 2H), 7.29 (t,  $J = 7.0$  Hz, 1H), 7.19 (d,  $J = 8.0$  Hz, 1H), 7.15 (s, 1H), 6.86 (t,  $J = 4.0$  Hz, 2H), 2.63-2.55 (m, 1H), 2.36-2.30 (m, 1H), 2.29 (s, 3H), 2.27-2.23 (m, 1H), 2.19 (s, 1H), 2.12-2.05 (m, 1H), 1.35 (s, 3H).  $^{13}\text{C}$  NMR (125 MHz,  $\text{CDCl}_3$ )  $\delta$  217.7, 146.0, 145.1, 139.7, 136.9, 133.2, 128.6, 128.4, 128.3, 127.4, 124.71, 124.69, 122.9, 89.2, 62.5, 37.0, 34.2, 21.5, 17.7. HRMS  $m/z$  (ESI $^+$ ): Calculated for  $\text{C}_{21}\text{H}_{20}\text{O}_2$  ( $[\text{M}]^+$ ) 304.1458, found 304.1460.

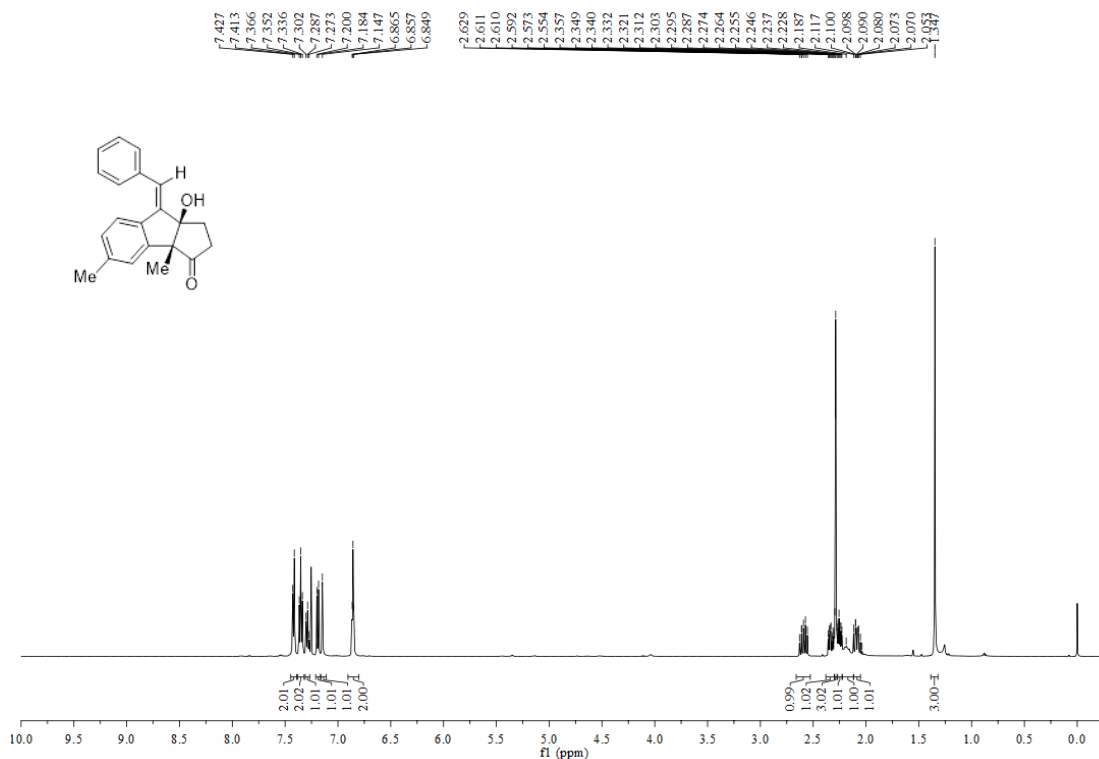

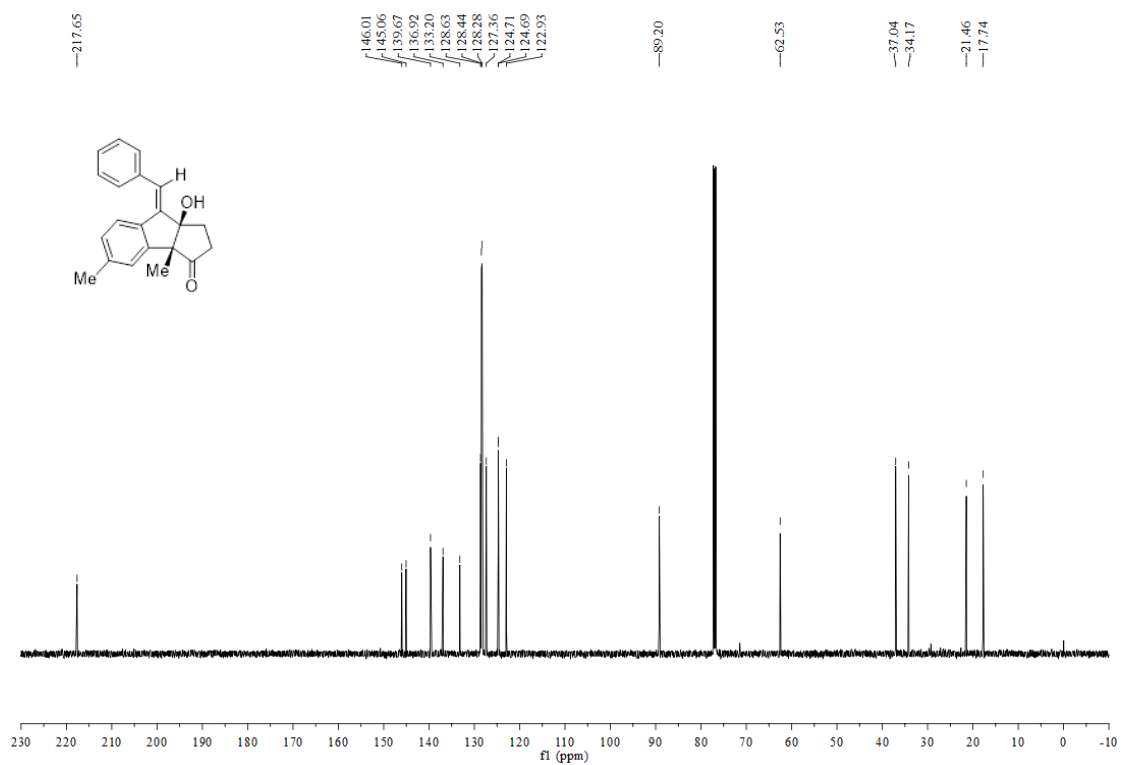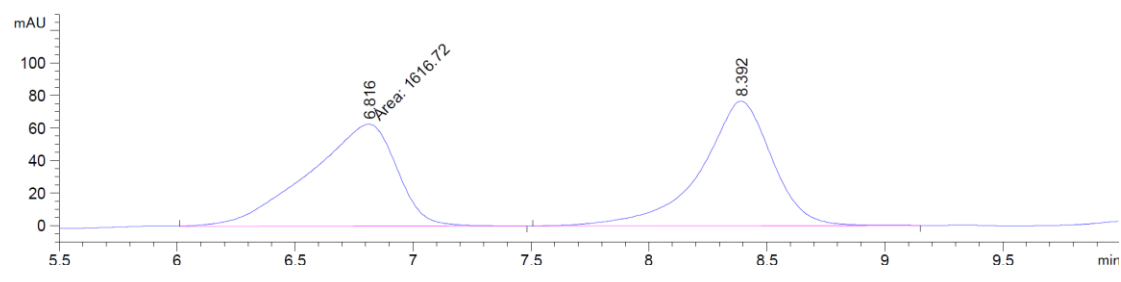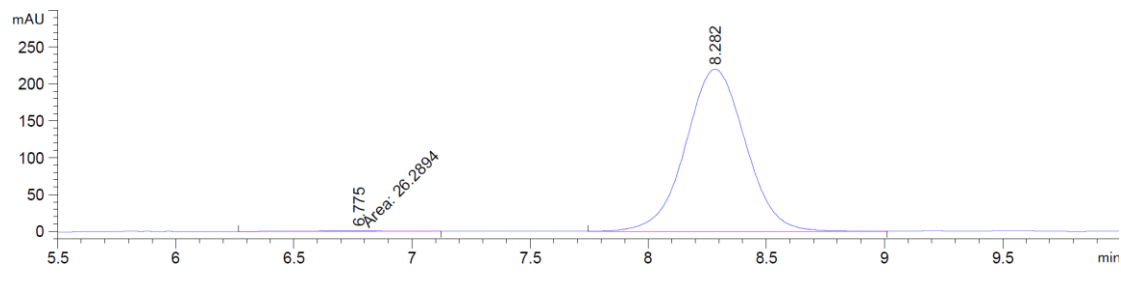

Signal 1: DAD1 A, Sig=254,4 Ref=360,100

| Peak # | RetTime [min] | Type | Width [min] | Area [mAU*s] | Height [mAU] | Area %  |
|--------|---------------|------|-------------|--------------|--------------|---------|
| 1      | 6.775         | MM   | 0.3335      | 26.28944     | 1.31390      | 0.6737  |
| 2      | 8.282         | BB   | 0.2737      | 3875.87720   | 219.81409    | 99.3263 |



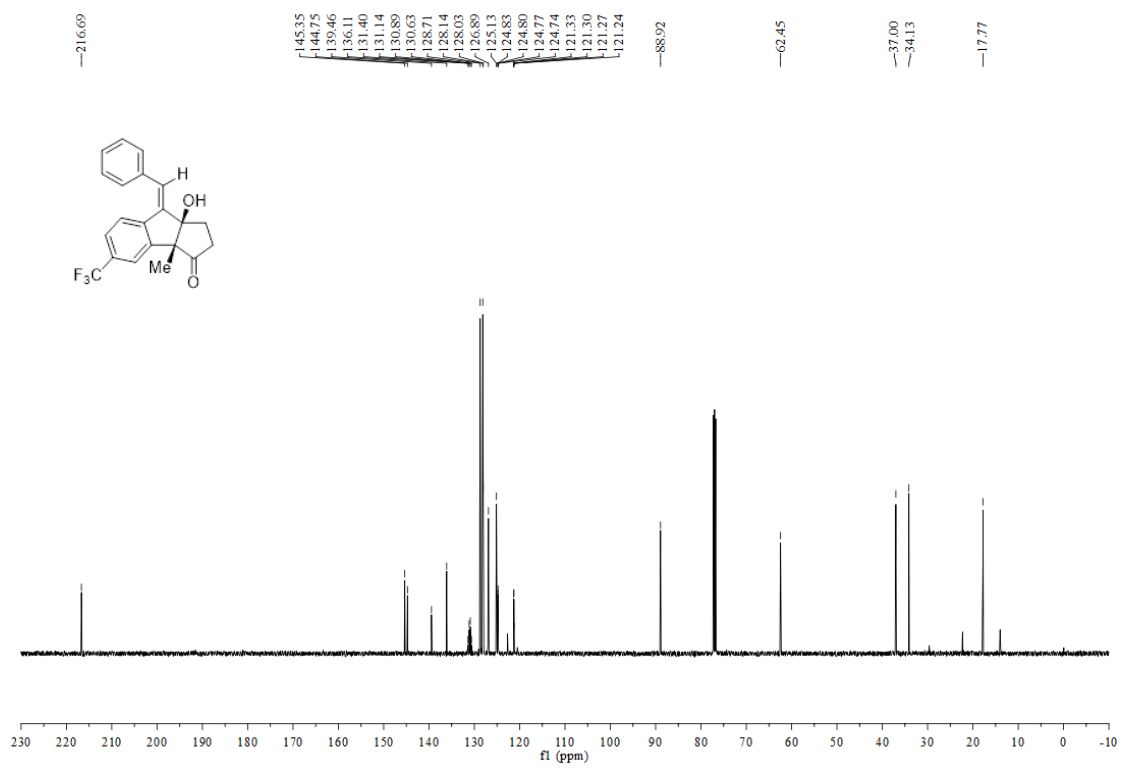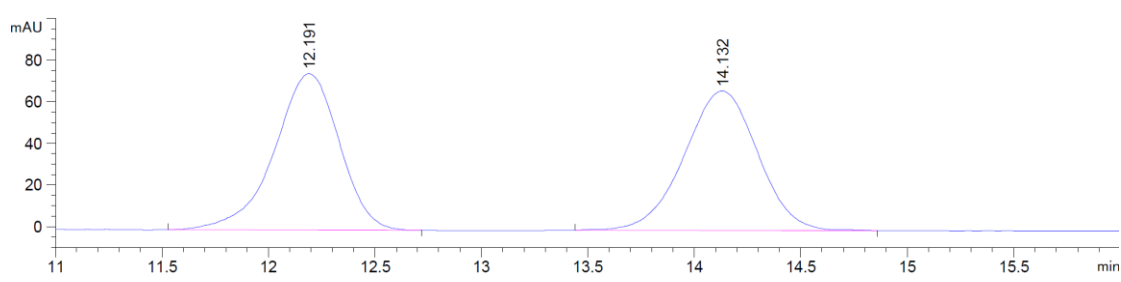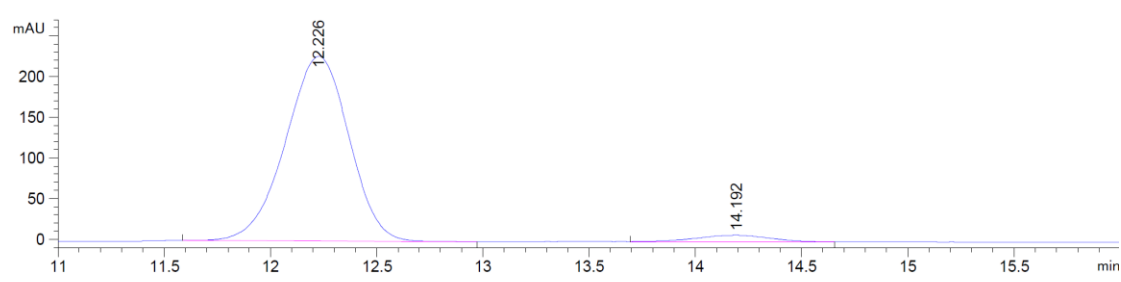

Signal 1: DAD1 A, Sig=254,4 Ref=360,100

| Peak # | RetTime [min] | Type | Width [min] | Area [mAU*s] | Height [mAU] | Area %  |
|--------|---------------|------|-------------|--------------|--------------|---------|
| 1      | 12.226        | BB   | 0.3265      | 4722.60010   | 227.17953    | 96.2510 |
| 2      | 14.192        | BB   | 0.2932      | 183.94580    | 7.97210      | 3.7490  |





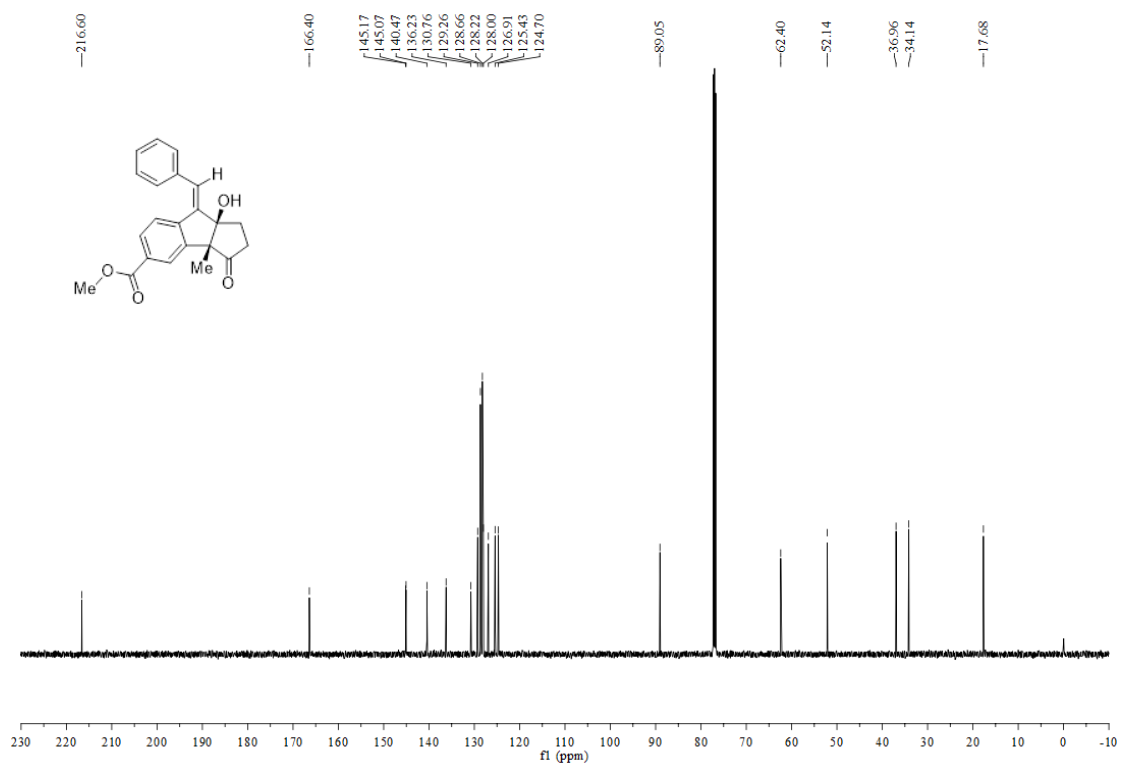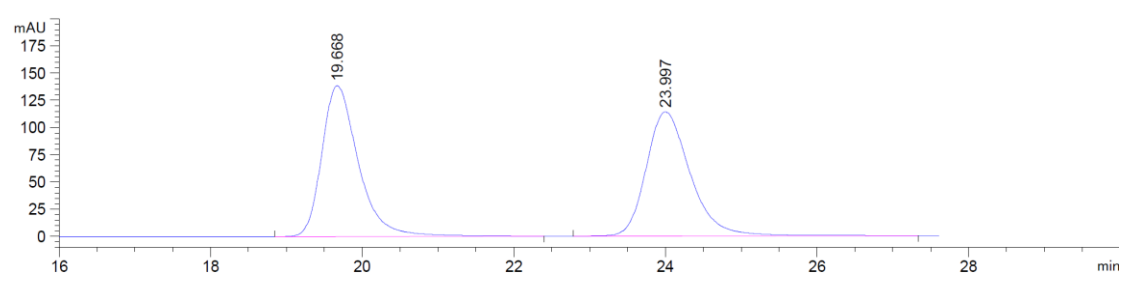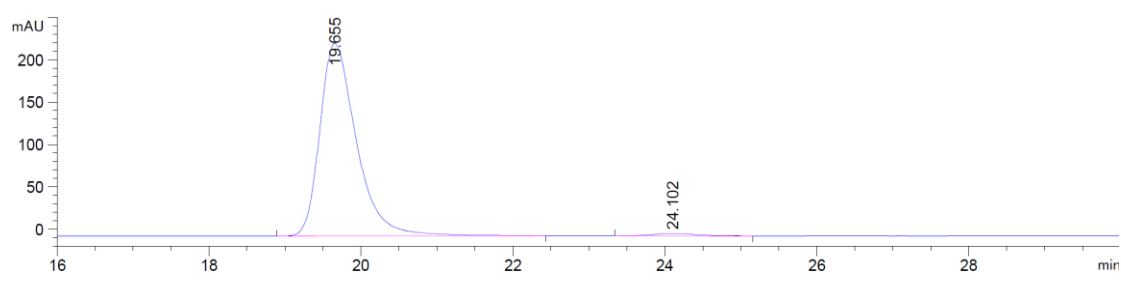

Signal 7: DAD1 G, Sig=280,4 Ref=360,100

| Peak # | RetTime [min] | Type | Width [min] | Area [mAU*s] | Height [mAU] | Area %  |
|--------|---------------|------|-------------|--------------|--------------|---------|
| 1      | 19.655        | BB   | 0.5069      | 7622.26025   | 227.47009    | 98.5973 |
| 2      | 24.102        | BB   | 0.4669      | 108.43837    | 2.78110      | 1.4027  |

**(3*aR*,8*aR*)-8-((*E*)-Benzylidene)-4,6-difluoro-8*a*-hydroxy-3*a*-methyl-1,3*a*,8,8*a*-tetrahydrocyclopenta[*a*]inden-3(2*H*)-one (2*ac*)**

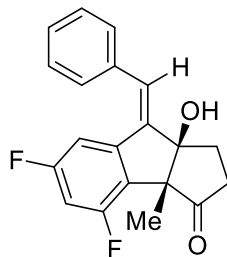

Purified by chromatography on silica gel, eluting with ethyl acetate/petroleum ether 1:5 (v/v); brown solid, Mp = 124-125 °C; 49 mg, 65% yield;  $[\alpha]_D^{20} = -181.4$  (*c* 0.5, CH<sub>2</sub>Cl<sub>2</sub>), 90% ee [Phenomenex Lux 5u Amylose-2 column (25 cm × 0.46 cm ID), *n*-hexane/*i*-PrOH = 80/20, 0.8 mL/min, 254 nm;  $t_{\text{minor}} = 5.6$  min,  $t_{\text{major}} = 7.3$  min]; <sup>1</sup>H NMR (600 MHz, CDCl<sub>3</sub>) δ 7.40-7.33 (m, 5H), 7.05 (s, 1H), 6.73 (d, *J* = 7.8 Hz, 1H), 6.64 (t, *J* = 9.0 Hz, 1H), 2.59-2.53 (m, 1H), 2.40-2.35 (m, 2H), 2.28-2.17 (m, 2H), 1.43 (s, 3H). <sup>13</sup>C NMR (150 MHz, CDCl<sub>3</sub>) δ 214.5, 162.4 (dd, *J* = 246.0, 10.5 Hz), 160.0 (dd, *J* = 252.0, 12.0 Hz), 144.6, 140.0 (dd, *J* = 10.5, 7.5 Hz), 135.7, 128.8, 128.12, 128.08, 127.0, 126.2 (dd, *J* = 16.5, 3.0 Hz), 107.8 (dd, *J* = 23.9, 4.5 Hz), 104.9 (dd, *J* = 25.5, 24.0 Hz), 89.0, 61.4 (d, *J* = 3.7 Hz), 36.5, 33.8, 15.2. HRMS *m/z* (ESI<sup>+</sup>): Calculated for C<sub>20</sub>H<sub>16</sub>F<sub>2</sub>O<sub>2</sub>Na<sup>+</sup> ([M+Na]<sup>+</sup>) 349.1011, found 349.1013.

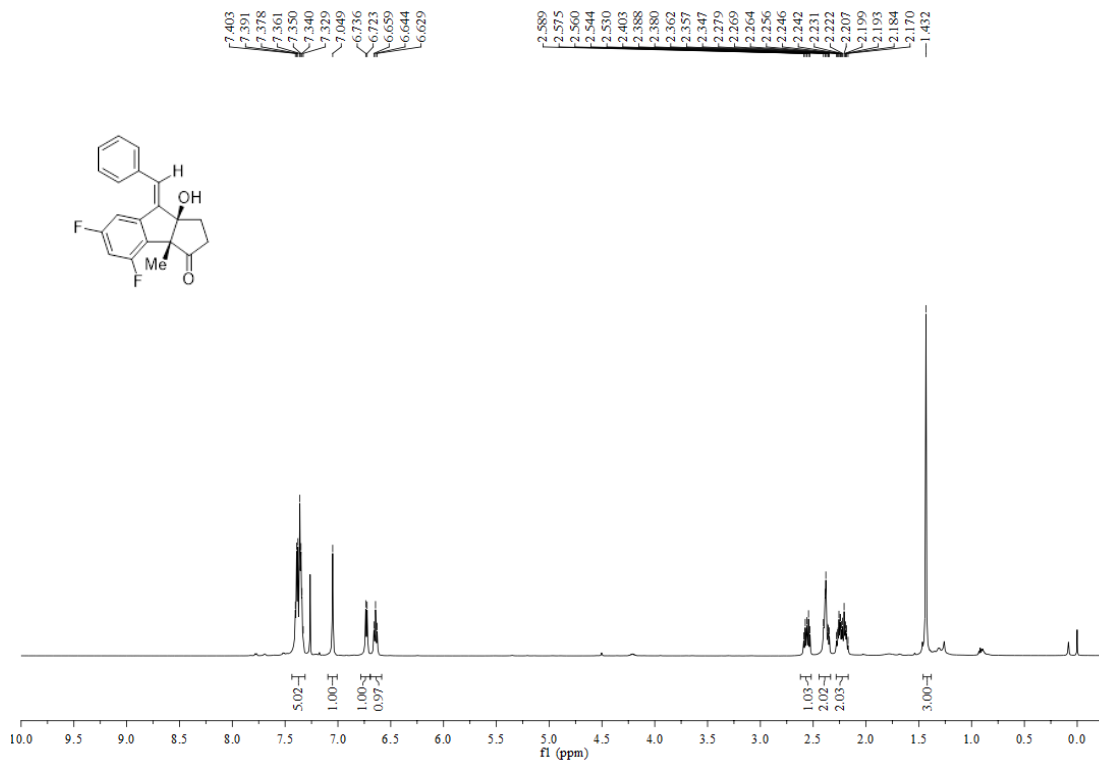

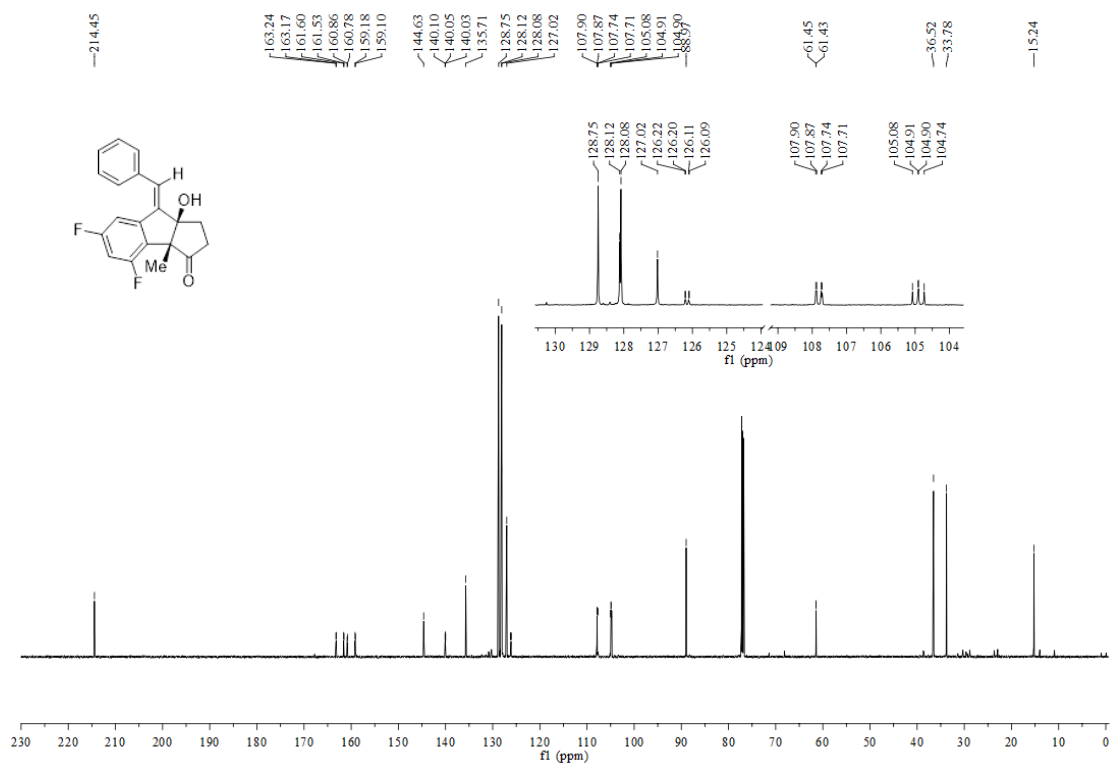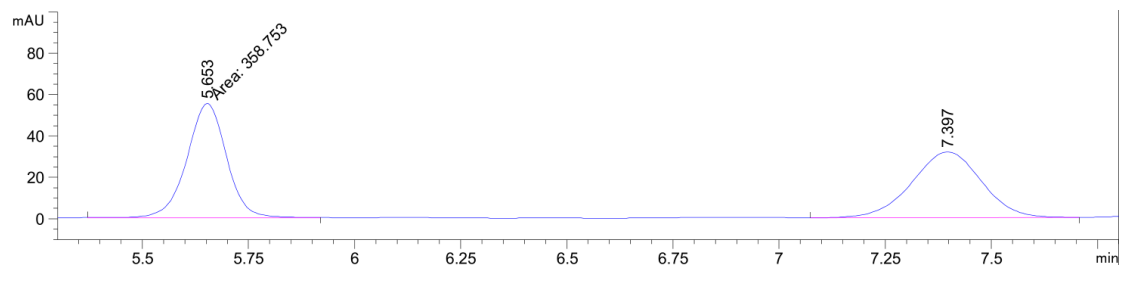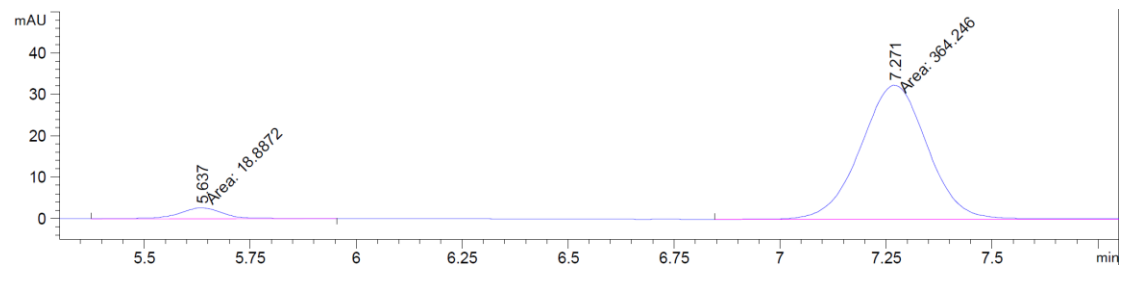

Signal 1: DAD1 A, Sig=254,4 Ref=360,100

| Peak # | RetTime [min] | Type | Width [min] | Area [mAU*s] | Height [mAU] | Area %  |
|--------|---------------|------|-------------|--------------|--------------|---------|
| 1      | 5.637         | MM   | 0.1200      | 18.88716     | 2.62237      | 4.9297  |
| 2      | 7.271         | MM   | 0.1865      | 364.24640    | 32.55622     | 95.0703 |

**(3*aR*,8*aR*)-8-((*E*)-Benzylidene)-3*a*-ethyl-8*a*-hydroxy-1,3*a*,8,8*a*-tetrahydrocyclopenta[*a*]inden-3(2*H*)-one (2*ad*)**

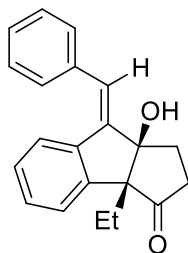

Purified by chromatography on silica gel, eluting with ethyl acetate/petroleum ether 1:5 (v/v); brown solid, Mp = 78-79 °C; 45 mg, 74% yield;  $[\alpha]_D^{20} = -250.2$  (*c* 0.5, CH<sub>2</sub>Cl<sub>2</sub>), 98% ee [Phenomenex Lux 5u Amylose-2 column (25 cm × 0.46 cm ID), *n*-hexane/*i*-PrOH = 90/10, 0.7 mL/min, 254 nm;  $t_{\text{minor}} = 8.2$  min,  $t_{\text{major}} = 9.4$  min]; <sup>1</sup>H NMR (500 MHz, CDCl<sub>3</sub>) δ 7.41 (d, *J* = 7.0 Hz, 2H), 7.36 (t, *J* = 7.5 Hz, 2H), 7.32-7.27 (m, 3H), 7.21-7.18 (m, 1H), 7.06-7.02 (m, 1H), 6.87 (s, 1H), 2.63-2.59 (m, 1H), 2.34-2.22 (m, 3H), 2.07-2.00 (m, 2H), 1.93-1.88 (m, 1H), 0.83 (t, *J* = 7.5 Hz, 3H). <sup>13</sup>C NMR (125 MHz, CDCl<sub>3</sub>) δ 217.6, 147.4, 142.7, 136.95, 136.94, 129.1, 128.5, 128.2, 127.6, 127.4, 124.84, 124.75, 122.3, 89.3, 66.4, 37.5, 35.1, 25.5, 9.0. HRMS *m/z* (ESI<sup>+</sup>): Calculated for C<sub>21</sub>H<sub>20</sub>O<sub>2</sub>Na<sup>+</sup> ([M+Na]<sup>+</sup>) 327.1356, found 327.1356.

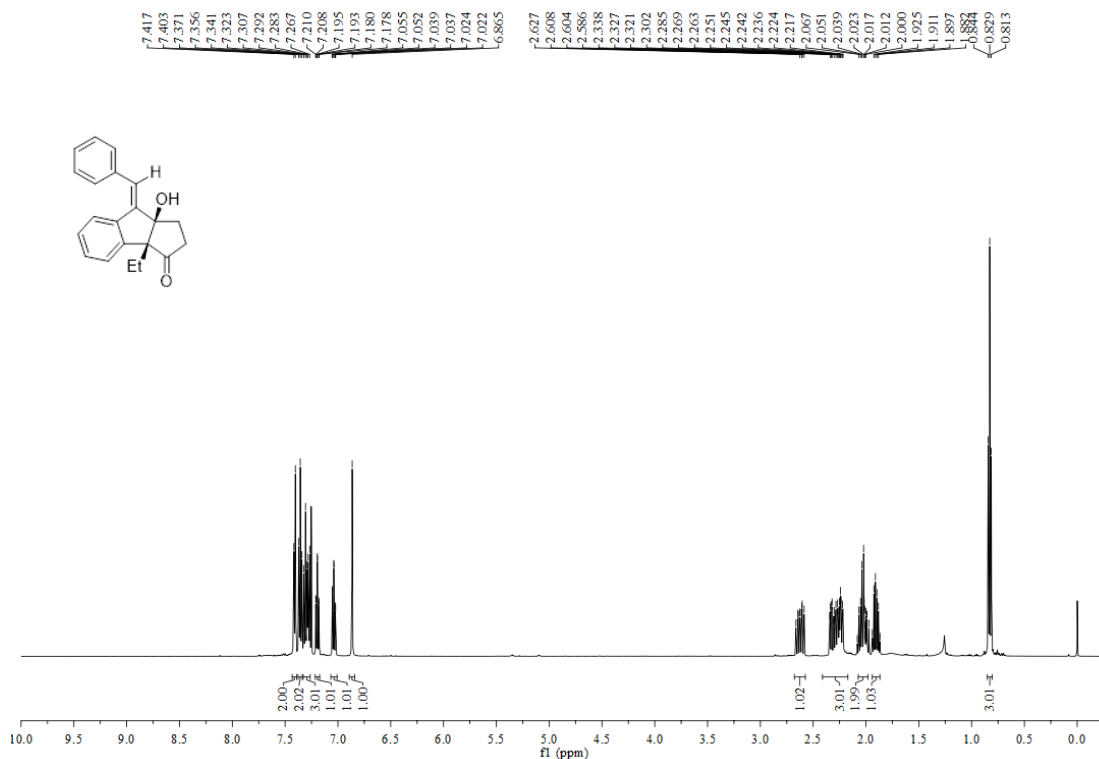

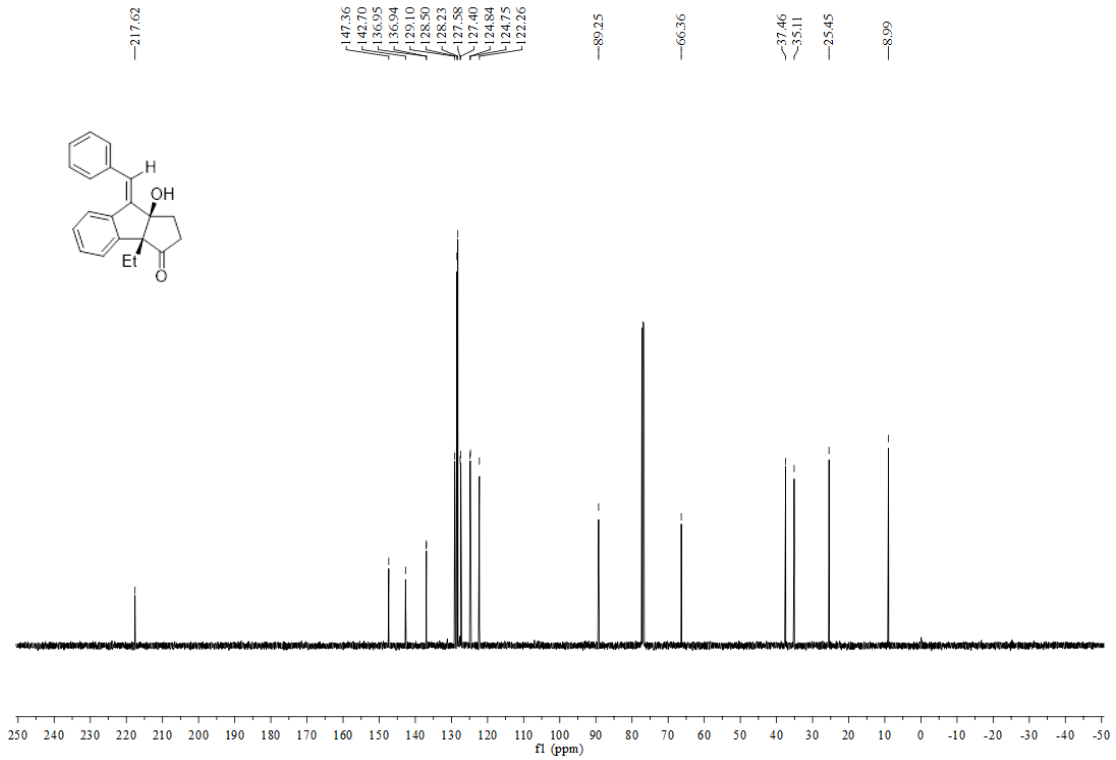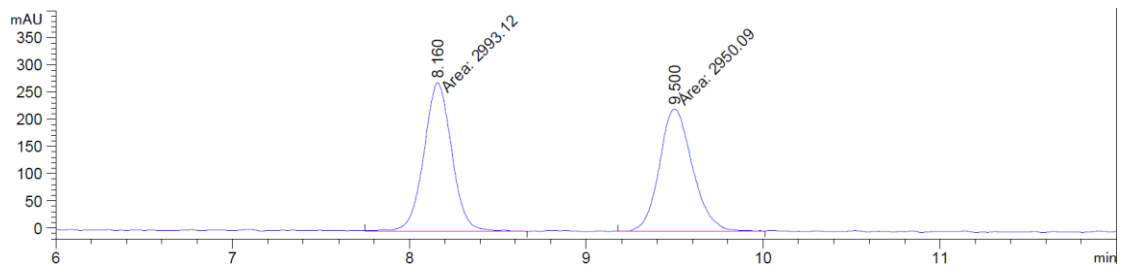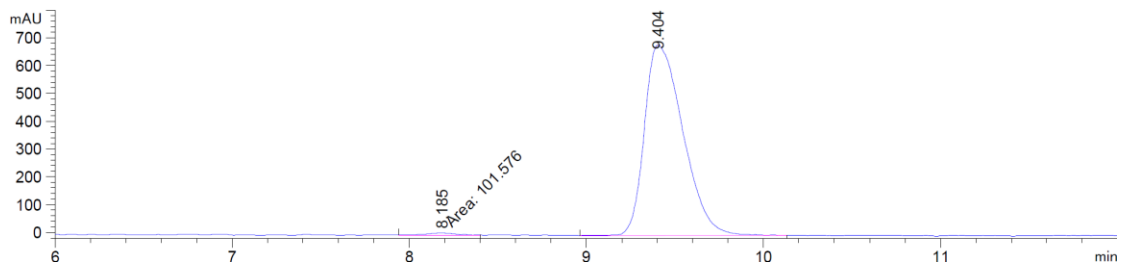

Signal 1: DAD1 A, Sig=254,4 Ref=360,100

| Peak # | RetTime [min] | Type | Width [min] | Area [mAU*s] | Height [mAU] | Area %  |
|--------|---------------|------|-------------|--------------|--------------|---------|
| 1      | 8.185         | MM   | 0.1962      | 101.57608    | 8.62751      | 0.9688  |
| 2      | 9.404         | VV R | 0.2367      | 1.03829e4    | 685.52063    | 99.0312 |

**(4*b*R,9*b*S,E)-10-Ethylidene-9*b*-hydroxy-4*b*-methyl-9*b*,10-dihydroindenof[2,1-*a*]inden-5(4*b*H)-one (2*ae*)**

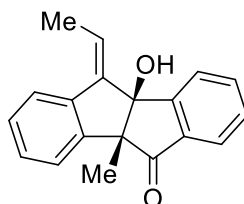

Purified by chromatography on silica gel, eluting with ethyl acetate/petroleum ether 1:5 (v/v); yellow oil; 50 mg, 91% yield;  $[\alpha]_D^{20} = -281.6$  ( $c$  0.5,  $\text{CH}_2\text{Cl}_2$ ), 96% ee [Daicel Chiralcel OJ-H column (25 cm  $\times$  0.46 cm ID),  $n$ -hexane/*i*-PrOH = 90/10, 0.7 mL/min, 254 nm;  $t_{\text{minor}} = 15.6$  min,  $t_{\text{major}} = 17.0$  min];  $^1\text{H}$  NMR (400 MHz,  $\text{CDCl}_3$ )  $\delta$  7.71-7.69 (m, 1H), 7.53-7.50 (m, 2H), 7.43-7.39 (m, 2H), 7.29-7.25 (m, 1H), 7.15-7.13 (m, 2H), 6.43 (q,  $J = 8.0$  Hz, 1H), 2.73 (s, 1H), 2.05 (d,  $J = 4.0$  Hz, 3H), 1.41 (s, 3H).  $^{13}\text{C}$  NMR (100 MHz,  $\text{CDCl}_3$ )  $\delta$  205.4, 154.8, 144.9, 144.2, 136.5, 135.4, 134.4, 129.8, 128.6, 128.3, 125.0, 124.7, 124.6, 123.8, 121.8, 86.5, 63.0, 17.5, 14.7. HRMS  $m/z$  (ESI+): Calculated for  $\text{C}_{19}\text{H}_{17}\text{O}_2^+$  ( $[\text{M}+\text{H}]^+$ ) 277.1223, found 277.1220.

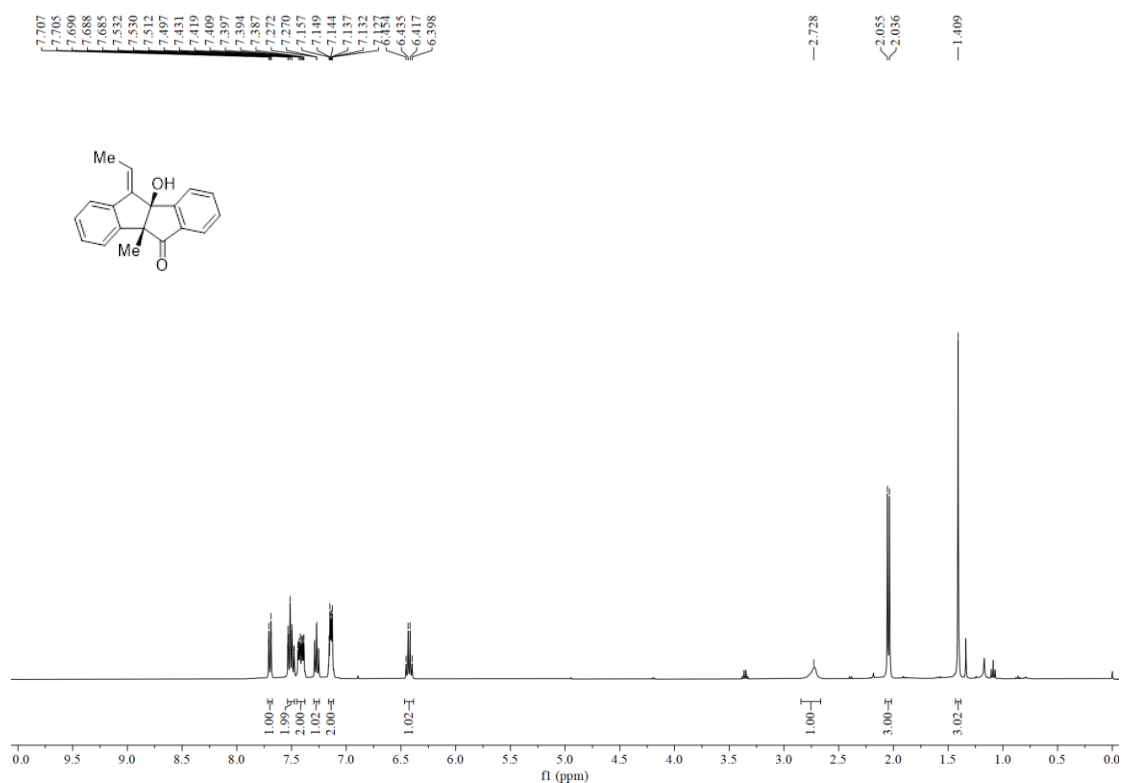

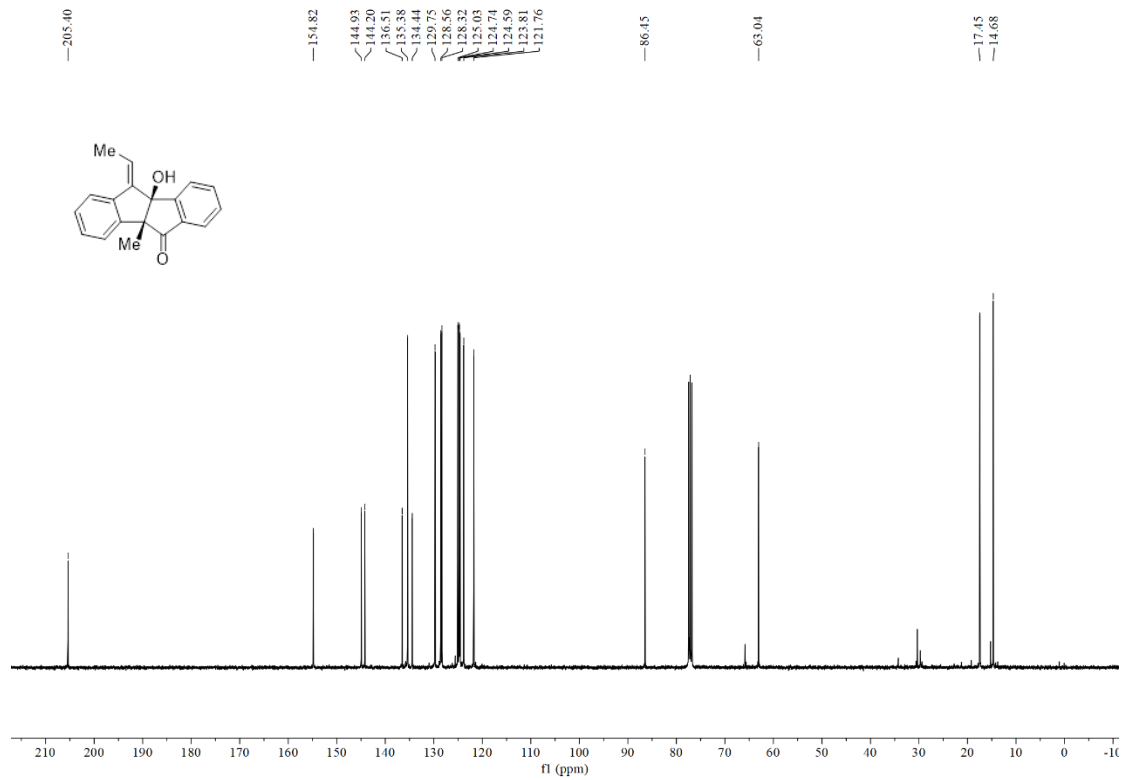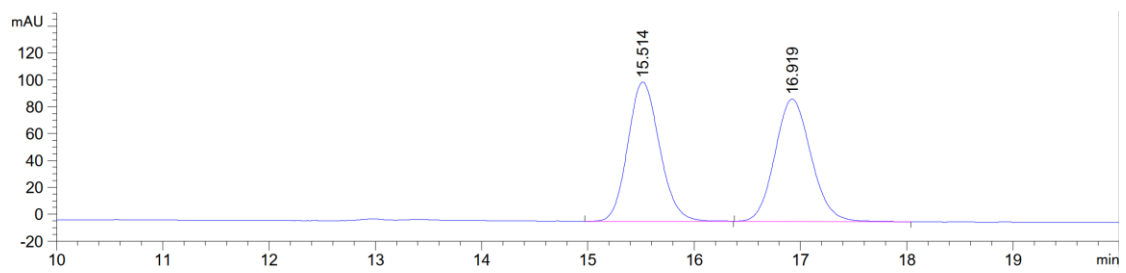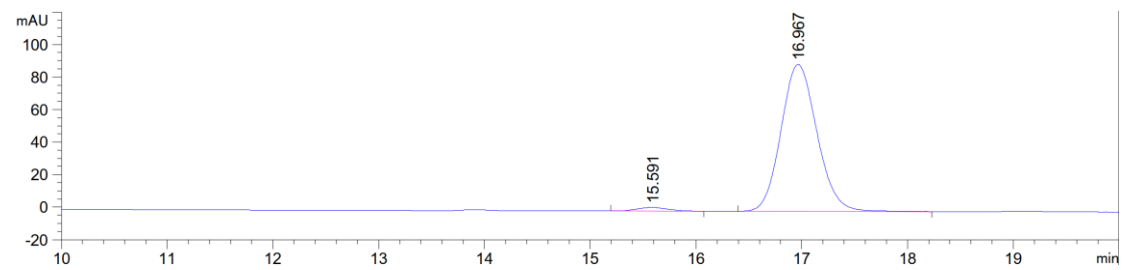

Signal 1: DAD1 A, Sig=254,4 Ref=360,100

| Peak # | RetTime [min] | Type | Width [min] | Area [mAU*s] | Height [mAU] | Area %  |
|--------|---------------|------|-------------|--------------|--------------|---------|
| 1      | 15.591        | BB   | 0.2800      | 44.79495     | 2.19612      | 2.0581  |
| 2      | 16.967        | BB   | 0.3654      | 2131.75073   | 90.31090     | 97.9419 |



**(4*R*,9*bS*)-10-((*E*)-Benzylidene)-9*b*-hydroxy-4*b*-methyl-9*b*,10-dihydroindenof[2,1-*a*]-inden-5(4*bH*)-one (2*af*)**

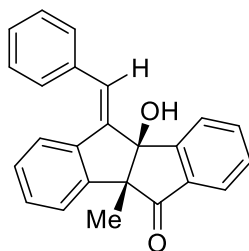

Purified by chromatography on silica gel, eluting with ethyl acetate/petroleum ether 1:5 (v/v); yellow solid, Mp = 214-215 °C; 61 mg, 87% yield;  $[\alpha]_D^{20} = -224.1$  (*c* 0.5, CH<sub>2</sub>Cl<sub>2</sub>), 93% ee [Daicel Chiralcel OJ-H column (25 cm × 0.46 cm ID), *n*-hexane/*i*-PrOH = 90/10, 0.8 mL/min, 254 nm;  $t_{\text{minor}} = 21.7$  min,  $t_{\text{major}} = 34.4$  min]; <sup>1</sup>H NMR (600 MHz, CDCl<sub>3</sub>) δ 7.95 (d, *J* = 7.2 Hz, 1H), 7.66-7.63 (m, 2H), 7.45 (d, *J* = 7.2 Hz, 2H), 7.43 (d, *J* = 3.6 Hz, 2H), 7.41 (t, *J* = 7.2 Hz, 1H), 7.37 (t, *J* = 7.2 Hz, 2H), 7.31 (t, *J* = 7.2 Hz, 1H), 7.17-7.14 (m, 2H), 6.96-6.94 (m, 1H), 2.84 (s, 1H), 1.59 (s, 3H). <sup>13</sup>C NMR (150 MHz, CDCl<sub>3</sub>) δ 204.9, 154.4, 145.7, 144.8, 136.9, 135.4, 135.0, 134.5, 129.9, 129.4, 128.5, 128.4, 127.8, 127.6, 125.7, 124.60, 124.56, 124.4, 123.9, 86.8, 62.9, 17.4. HRMS *m/z* (ESI<sup>+</sup>): Calculated for C<sub>24</sub>H<sub>18</sub>NaO<sub>2</sub><sup>+</sup> ([M+Na]<sup>+</sup>) 361.1199, found 361.1197.

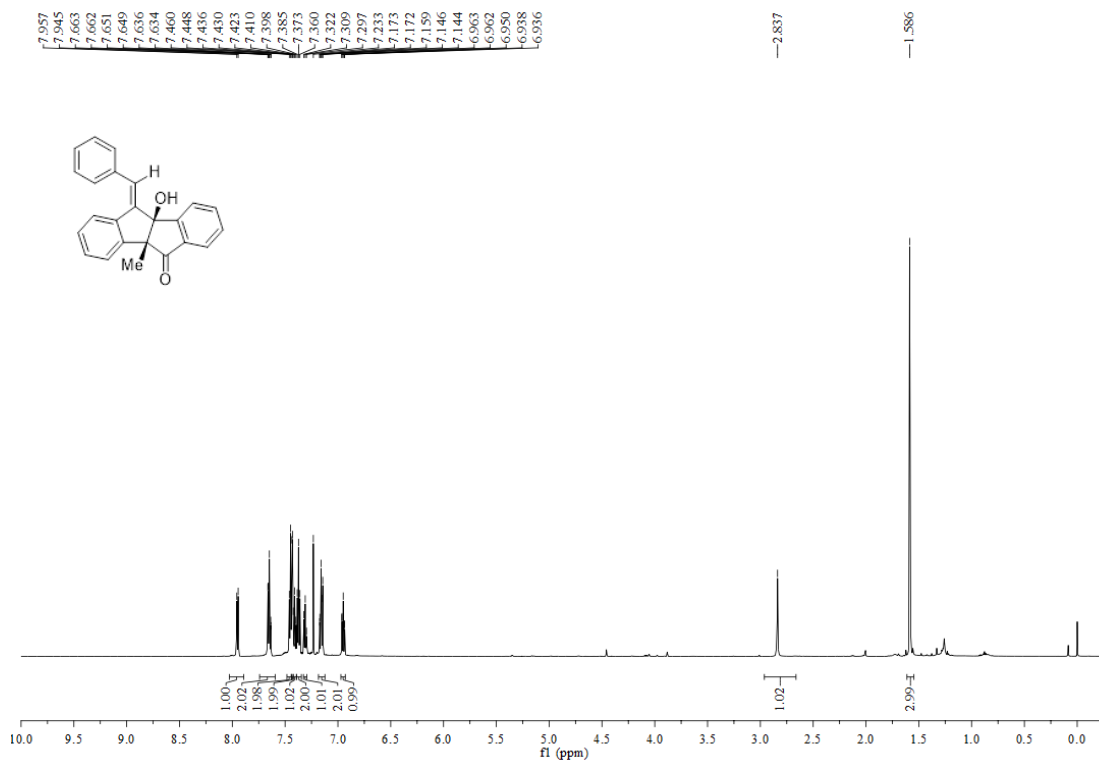

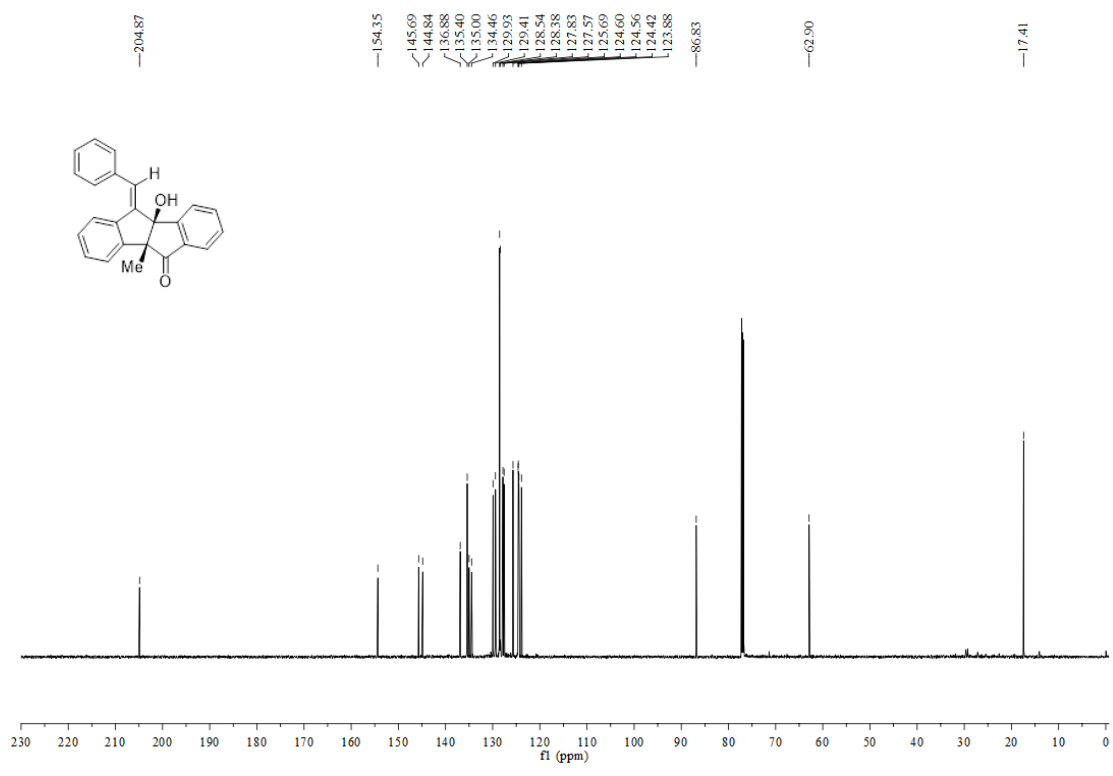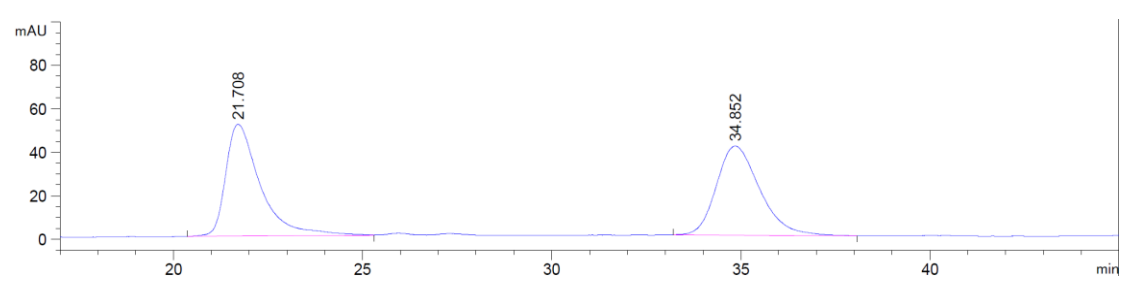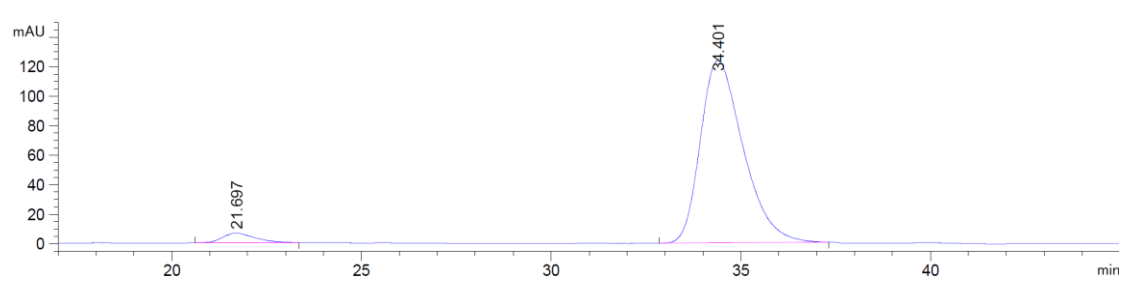

Signal 1: DAD1 A, Sig=254,4 Ref=360,100

| Peak # | RetTime [min] | Type | Width [min] | Area [mAU*s] | Height [mAU] | Area %  |
|--------|---------------|------|-------------|--------------|--------------|---------|
| 1      | 21.697        | BB   | 0.6950      | 376.37433    | 6.42947      | 3.7362  |
| 2      | 34.401        | BB   | 1.1584      | 9697.33594   | 123.73212    | 96.2638 |

**(4*b*R,9*b*S)-9*b*-Hydroxy-4*b*-methyl-10-((*E*)-4-methylbenzylidene)-9*b*,10-dihydro-indeno[2,1-*a*]inden-5(4*b*H)-one (2*ag*)**

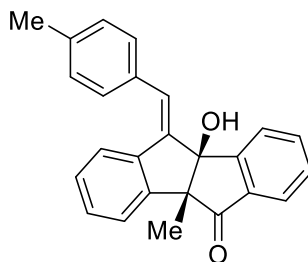

Purified by chromatography on silica gel, eluting with ethyl acetate/petroleum ether 1:5 (v/v); yellow oil; 40 mg, 57% yield;  $[\alpha]_D^{20} = -350.1$  ( $c$  0.5,  $\text{CH}_2\text{Cl}_2$ ), 92% ee [Daicel Chiralcel OJ-H column (25 cm  $\times$  0.46 cm ID),  $n$ -hexane/ $i$ -PrOH = 90/10, 0.7 mL/min, 280 nm;  $t_{\text{minor}} = 18.4$  min,  $t_{\text{major}} = 25.5$  min];  $^1\text{H}$  NMR (400 MHz,  $\text{CDCl}_3$ )  $\delta$  7.95 (d,  $J = 8.0$  Hz, 1H), 7.67-7.63 (m, 2H), 7.46-7.40 (m, 2H), 7.36-7.34 (m, 3H), 7.24 (s, 1H), 7.19-7.14 (m, 3H), 6.97 (t,  $J = 8.0$  Hz, 1H), 2.80 (s, 1H), 2.38 (s, 3H), 1.58 (s, 3H).  $^{13}\text{C}$  NMR (101 MHz,  $\text{CDCl}_3$ )  $\delta$  205.0, 154.4, 145.6, 144.3, 137.4, 135.4, 135.1, 134.4, 133.8, 129.9, 129.3, 129.2, 128.3, 127.8, 125.8, 124.6, 124.5, 124.4, 123.8, 86.8, 62.9, 21.3, 17.4. HRMS  $m/z$  (ESI $^+$ ): Calculated for  $\text{C}_{25}\text{H}_{21}\text{O}_2^+$  ( $[\text{M}+\text{H}]^+$ ) 353.1536, found 353.1530.

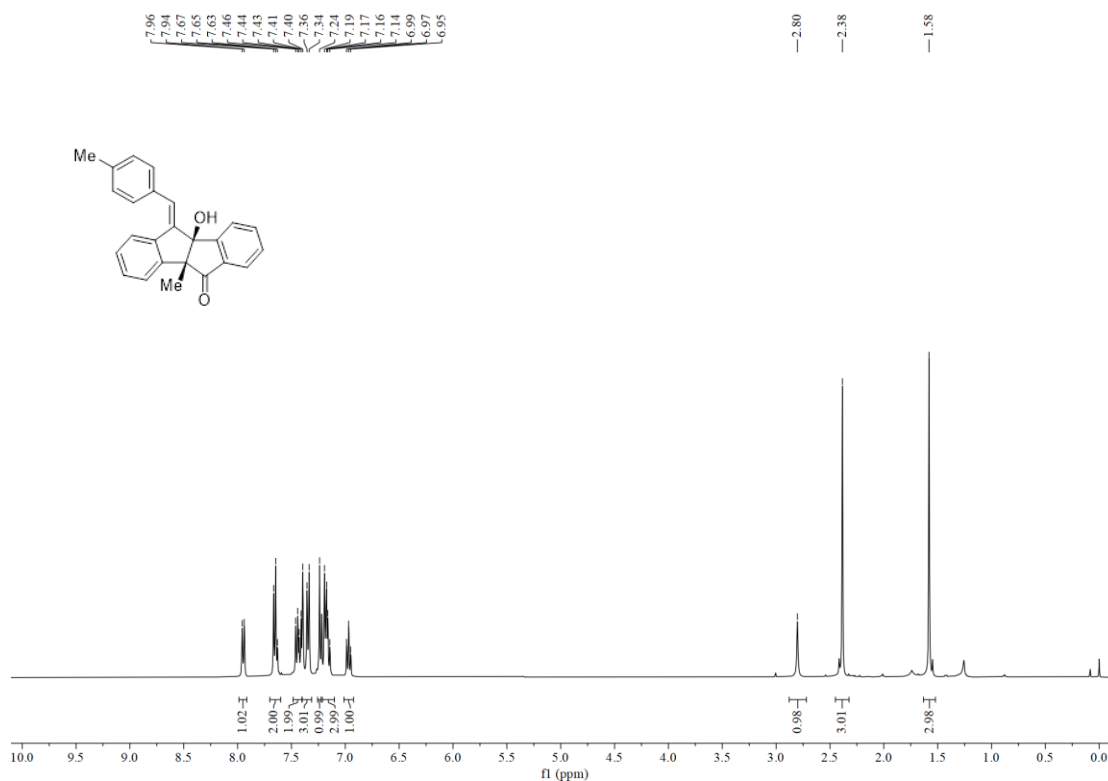

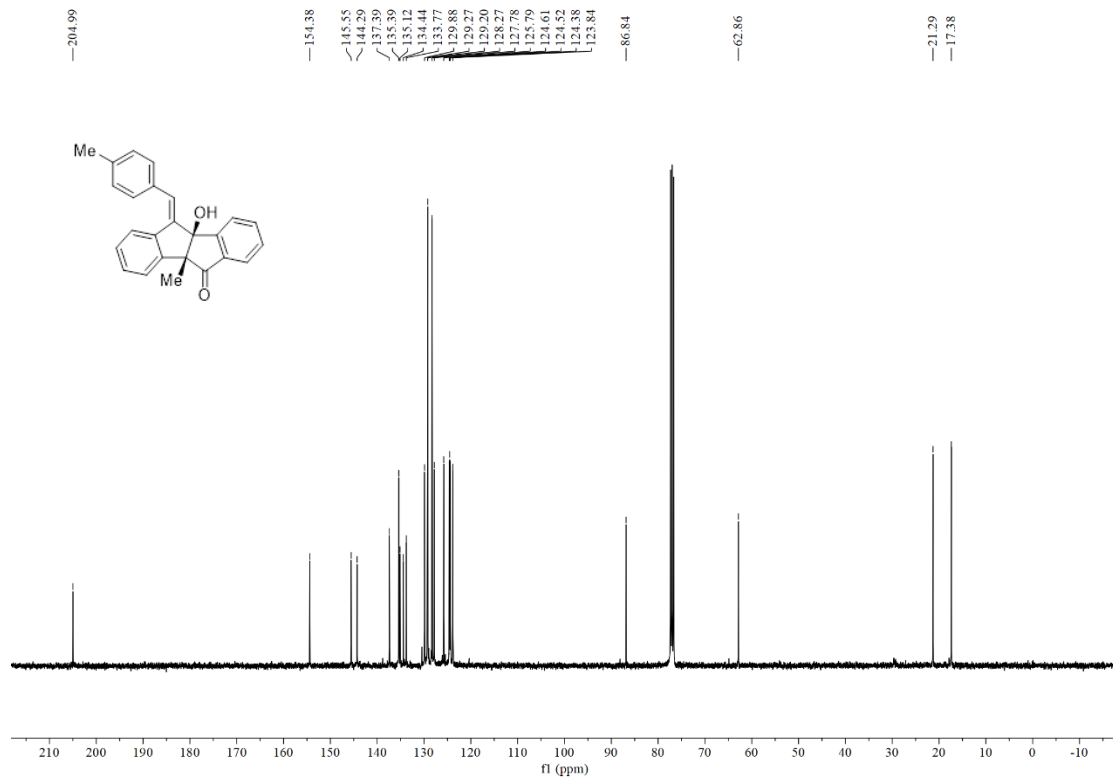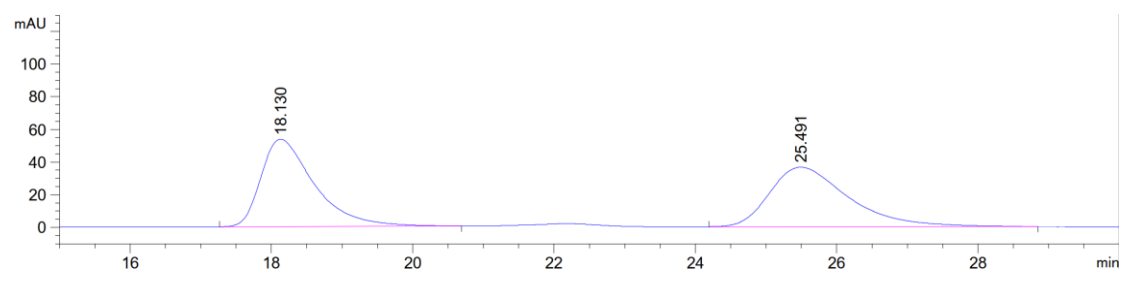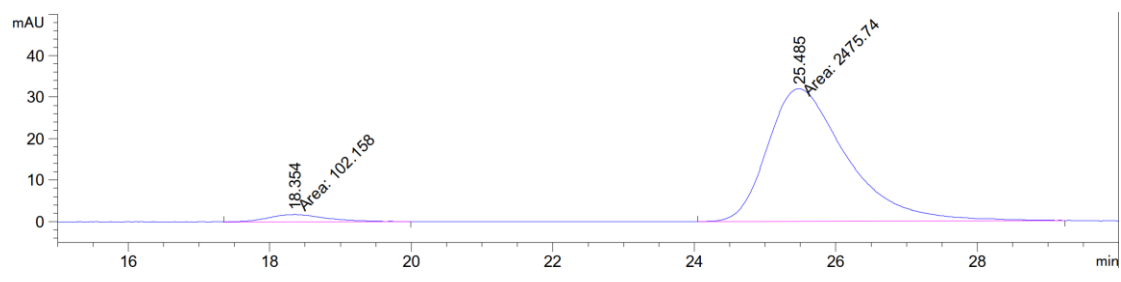

Signal 7: DAD1 G, Sig=280,4 Ref=360,100

| Peak # | RetTime [min] | Type | Width [min] | Area [mAU*s] | Height [mAU] | Area %  |
|--------|---------------|------|-------------|--------------|--------------|---------|
| 1      | 18.354        | MM   | 0.9626      | 102.15778    | 1.76884      | 3.9628  |
| 2      | 25.485        | MM   | 1.2907      | 2475.74390   | 31.96902     | 96.0372 |



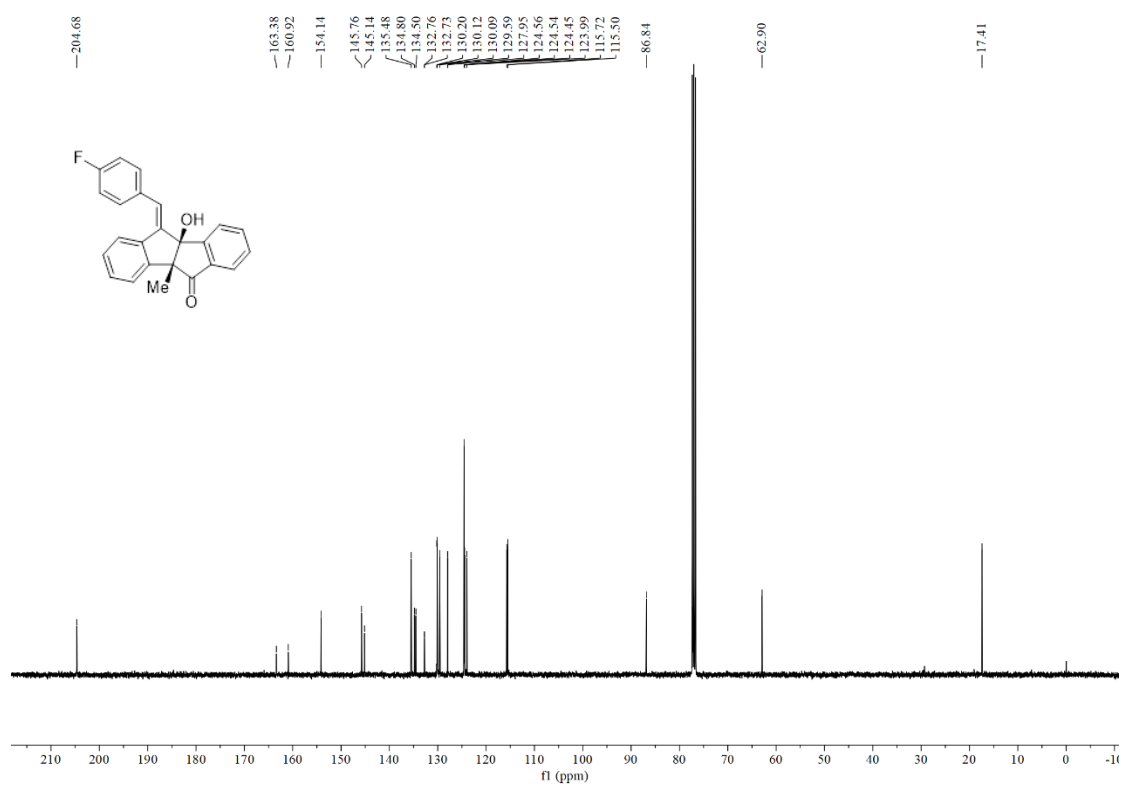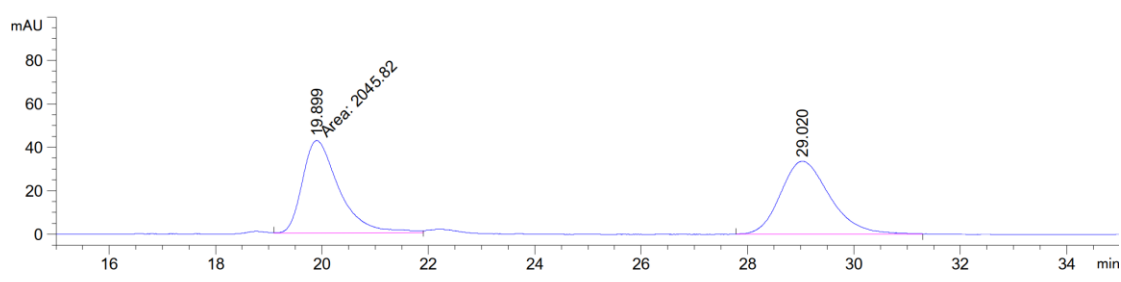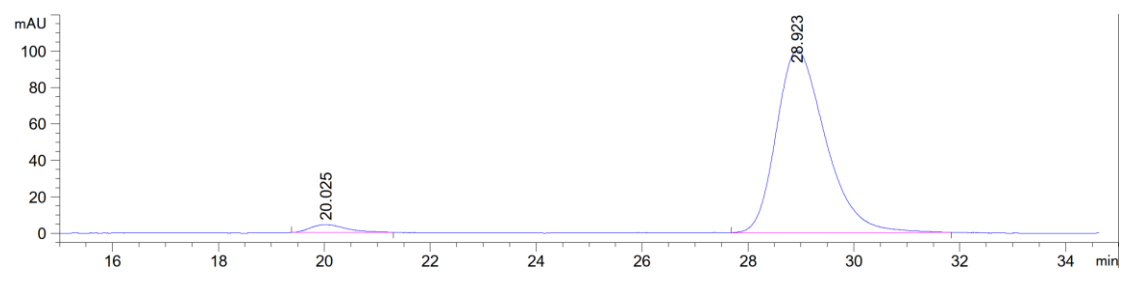

Signal 1: DAD1 A, Sig=254,4 Ref=360,100

| Peak # | RetTime [min] | Type | Width [min] | Area [mAU*s] | Height [mAU] | Area %  |
|--------|---------------|------|-------------|--------------|--------------|---------|
| 1      | 20.025        | BB   | 0.5550      | 199.48627    | 4.25457      | 2.9998  |
| 2      | 28.923        | BB   | 0.9079      | 6450.52539   | 100.08354    | 97.0002 |

**(4*R*,9*S*)-9*b*-Hydroxy-4*b*-methyl-10-((*E*)-3-methylbenzylidene)-9*b*,10-dihydro-indeno[2,1-*a*]inden-5(4*b**H*)-one (2*ai*)**

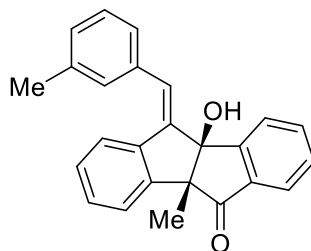

Purified by chromatography on silica gel, eluting with ethyl acetate/petroleum ether 1:5 (v/v); yellow oil; 56 mg, 80% yield;  $[\alpha]_D^{20} = -278.8$  ( $c$  0.5,  $\text{CH}_2\text{Cl}_2$ ), 88% ee [Daicel Chiralcel OJ-H column (25 cm  $\times$  0.46 cm ID),  $n$ -hexane/ $i$ -PrOH = 90/10, 0.7 mL/min, 254 nm;  $t_{\text{minor}} = 17.6$  min,  $t_{\text{major}} = 23.7$  min];  $^1\text{H}$  NMR (400 MHz,  $\text{CDCl}_3$ )  $\delta$  7.96-7.93 (m, 1H), 7.66-7.62 (m, 2H), 7.45-7.37 (m, 3H), 7.28-7.23 (m, 3H), 7.18-7.11 (m, 3H), 6.97-6.93 (m, 1H), 2.99 (s, 1H), 2.34 (s, 3H), 1.58 (s, 3H).  $^{13}\text{C}$  NMR (100 MHz,  $\text{CDCl}_3$ )  $\delta$  205.1, 154.4, 145.6, 144.6, 138.1, 136.8, 135.4, 135.1, 134.4, 129.9, 129.3, 129.0, 128.4, 128.3, 127.8, 125.9, 125.3, 124.60, 124.56, 124.4, 123.8, 86.8, 62.9, 21.3, 17.4. HRMS  $m/z$  (ESI $^+$ ): Calculated for  $\text{C}_{25}\text{H}_{21}\text{O}_2$  ( $[\text{M}+\text{H}]^+$ ) 353.1536, found 353.1532.

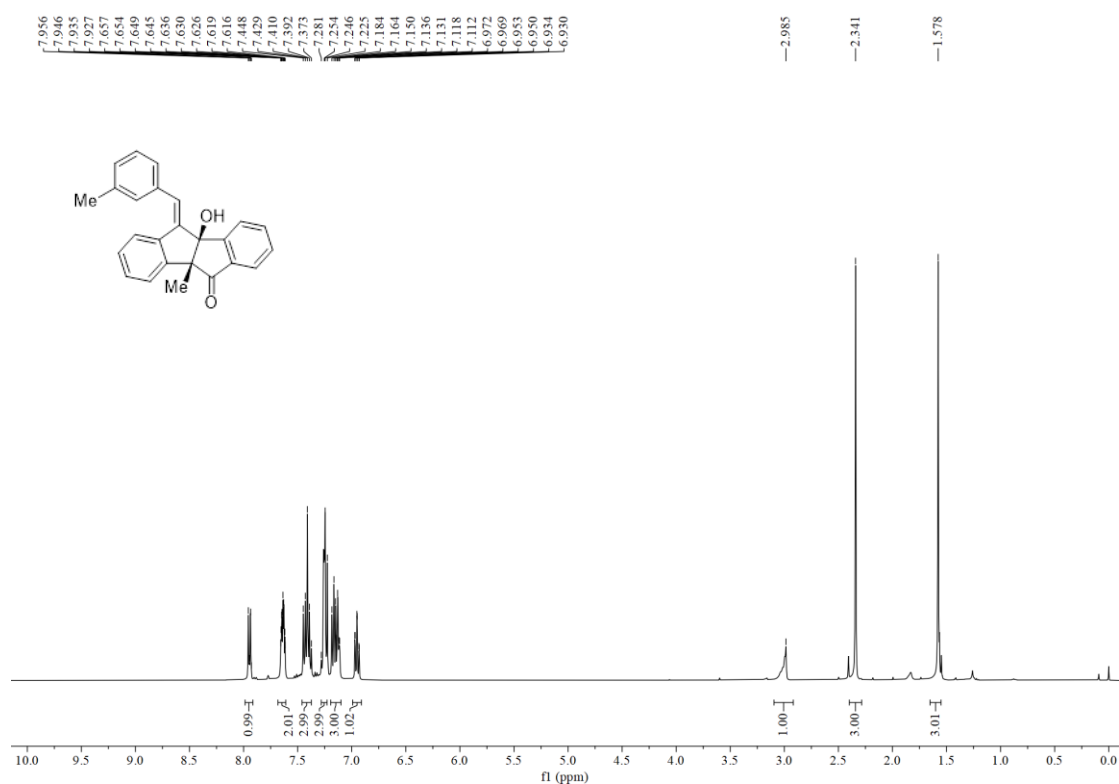

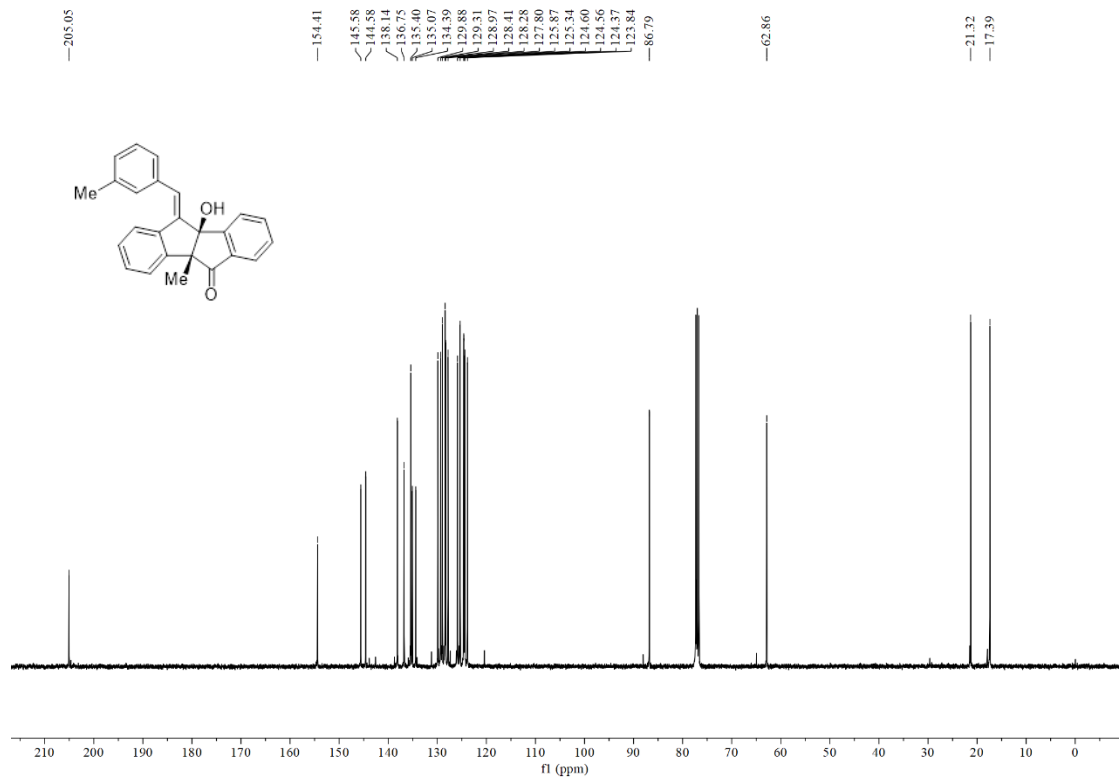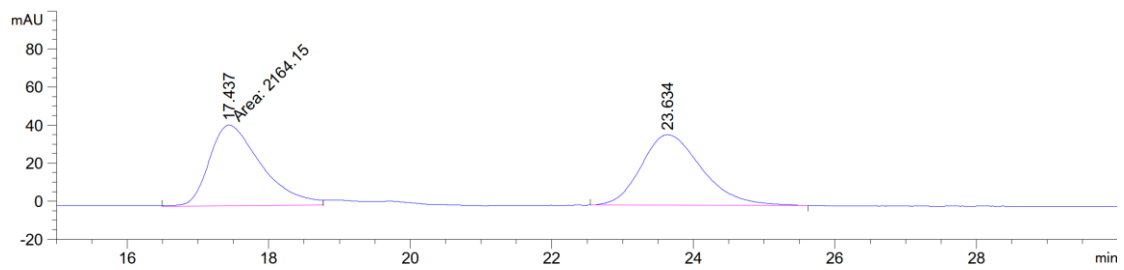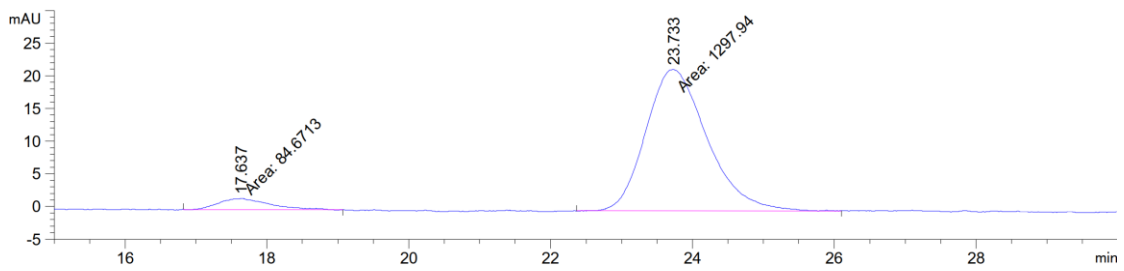

Signal 1: DAD1 A, Sig=254,4 Ref=360,100

| Peak # | RetTime [min] | Type | Width [min] | Area [mAU*s] | Height [mAU] | Area %  |
|--------|---------------|------|-------------|--------------|--------------|---------|
| 1      | 17.637        | MM   | 0.8264      | 84.67126     | 1.70773      | 6.1240  |
| 2      | 23.733        | MM   | 1.0010      | 1297.94067   | 21.61181     | 93.8760 |





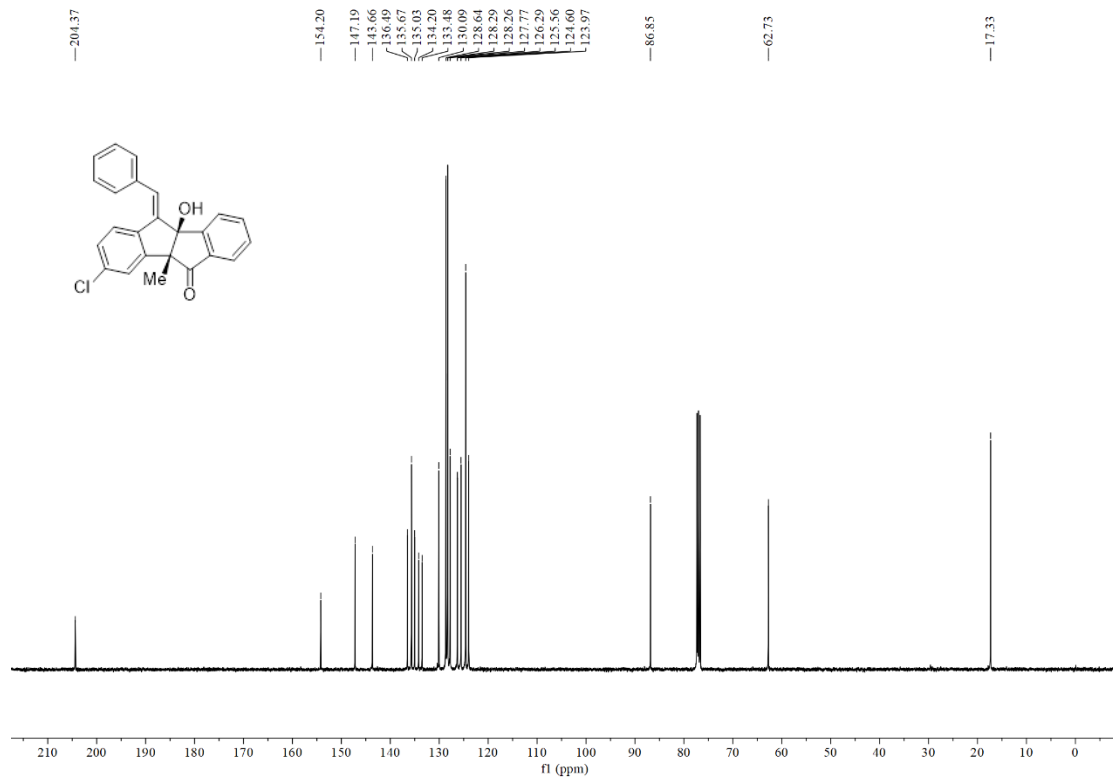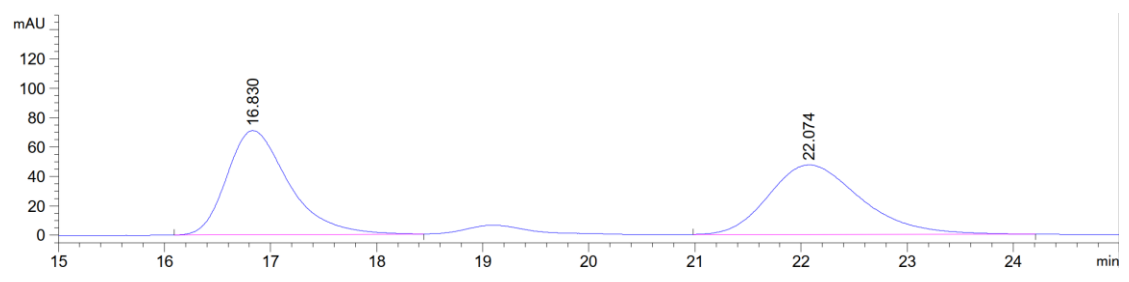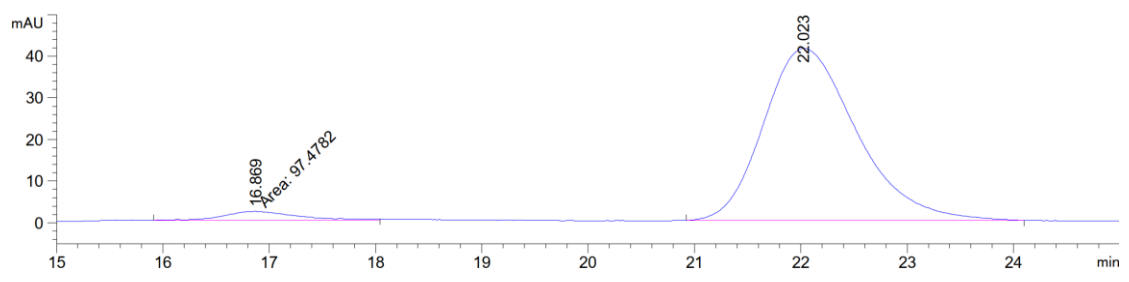

Signal 1: DAD1 A, Sig=254,4 Ref=360,100

| Peak # | RetTime [min] | Type | Width [min] | Area [mAU*s] | Height [mAU] | Area %  |
|--------|---------------|------|-------------|--------------|--------------|---------|
| 1      | 16.869        | MM   | 0.7713      | 97.47817     | 2.10644      | 3.7326  |
| 2      | 22.023        | BB   | 0.7518      | 2514.07251   | 41.31985     | 96.2674 |

**(4aR,9aR)-9-((E)-Benzylidene)-9a-hydroxy-4a-methyl-1,2,3,4a,9,9a-hexahydro-4H-fluoren-4-one (2ak)**

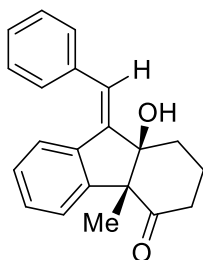

Purified by chromatography on silica gel, eluting with ethyl acetate/petroleum ether 1:5 (v/v); white solid, Mp = 148-149 °C; 43 mg, 71% yield;  $[\alpha]_D^{20} = -149.8$  ( $c$  1.0,  $\text{CH}_2\text{Cl}_2$ ), 86% ee [Phenomenex Lux 5u Cellulose-2 column (25 cm  $\times$  0.46 cm ID),  $n$ -hexane/ $i$ -PrOH = 90/10, 0.7 mL/min, 254 nm;  $t_{\text{major}} = 14.2$  min,  $t_{\text{minor}} = 17.7$  min];  $^1\text{H}$  NMR (600 MHz,  $\text{CDCl}_3$ )  $\delta$  7.41 (d,  $J = 7.2$  Hz, 2H), 7.33 (dd,  $J = 15.0, 7.5$  Hz, 3H), 7.28 (t,  $J = 7.2$  Hz, 1H), 7.18 (t,  $J = 7.8$  Hz, 1H), 7.04 (dd,  $J = 15.6, 7.8$  Hz, 2H), 6.76 (s, 1H), 2.47-2.44 (m, 1H), 2.33-2.28 (m, 2H), 2.05-2.01 (m, 2H), 1.93-1.88 (m, 1H), 1.77-1.74 (m, 1H), 1.39 (s, 3H).  $^{13}\text{C}$  NMR (150 MHz,  $\text{CDCl}_3$ )  $\delta$  211.5, 147.1, 146.7, 136.7, 136.1, 129.1, 128.5, 128.2, 127.42, 127.36, 125.2, 123.2, 123.1, 87.9, 62.0, 38.9, 36.1, 20.8, 20.1. HRMS  $m/z$  (ESI $^+$ ): Calculated for  $\text{C}_{21}\text{H}_{20}\text{O}_2\text{Na}^+$  ( $[\text{M}+\text{Na}]^+$ ) 327.1356, found 327.1355.

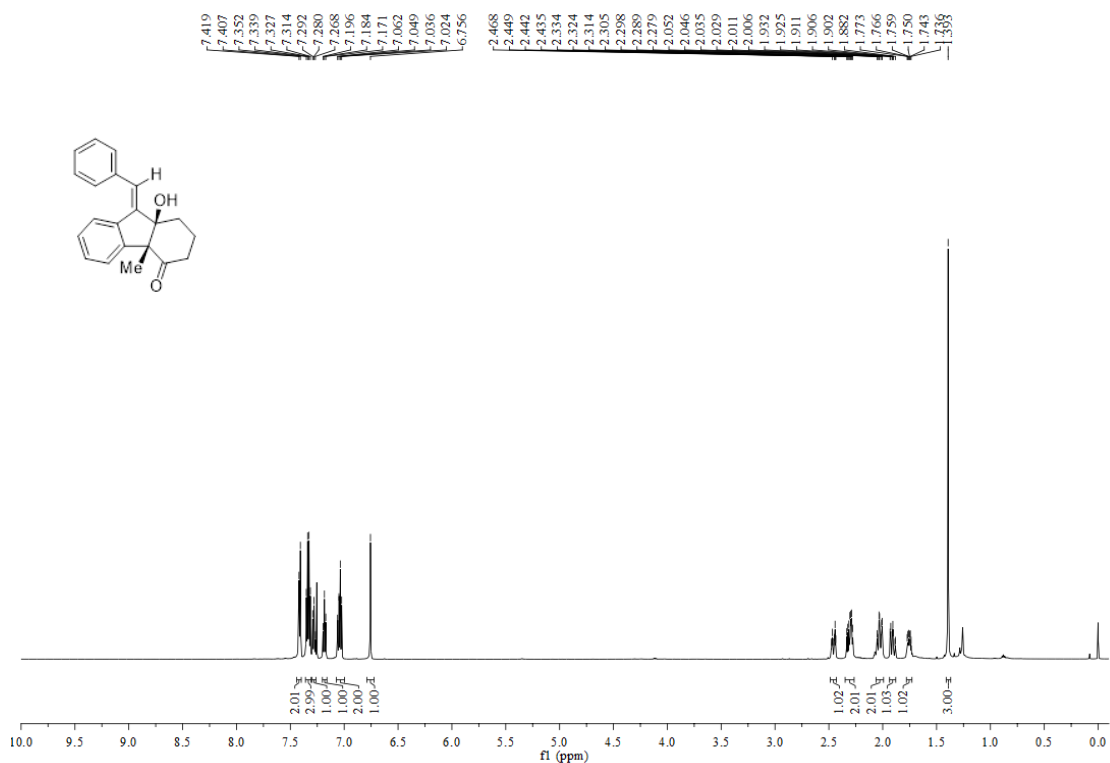

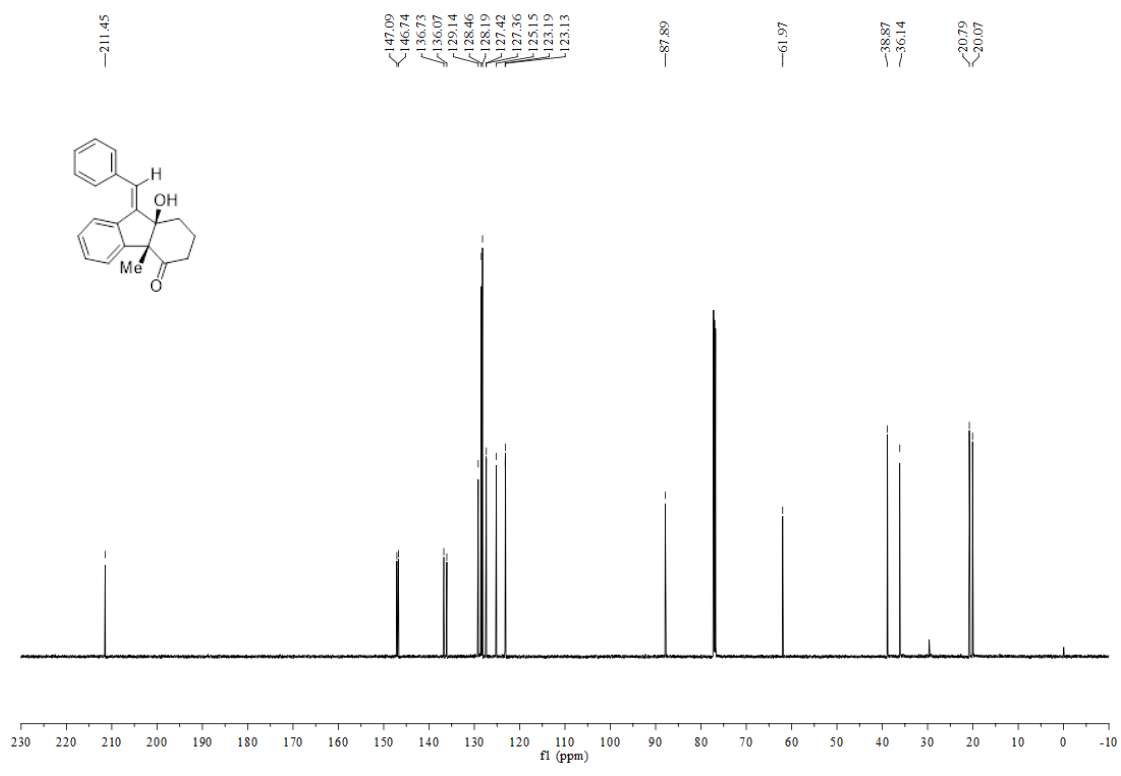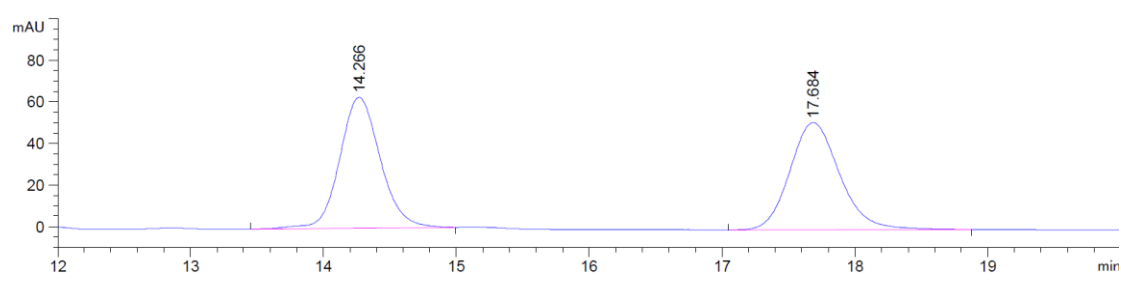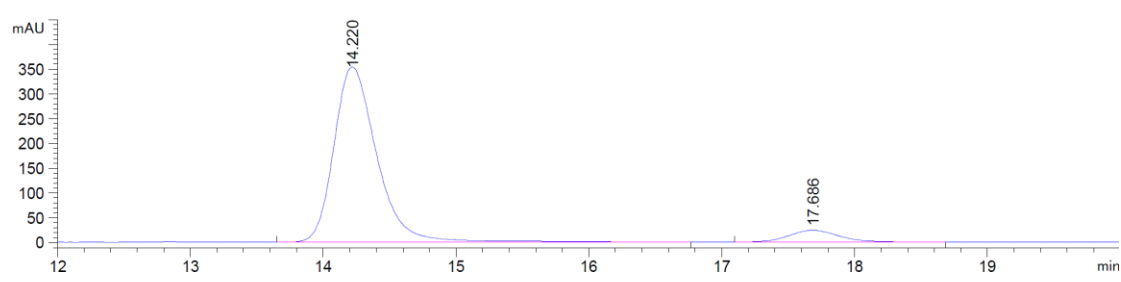

Signal 1: DAD1 A, Sig=254,4 Ref=360,100

| Peak # | RetTime [min] | Type | Width [min] | Area [mAU*s] | Height [mAU] | Area %  |
|--------|---------------|------|-------------|--------------|--------------|---------|
| 1      | 14.220        | BB   | 0.3438      | 7940.74512   | 353.79892    | 92.8290 |
| 2      | 17.686        | BB   | 0.3994      | 613.41754    | 23.59037     | 7.1710  |

**(4aR,9aR)-9-((E)-4-Chlorobenzylidene)-9a-hydroxy-4a-methyl-1,2,3,4a,9,9a-hexahydro-4H-fluoren-4-one (2a)**

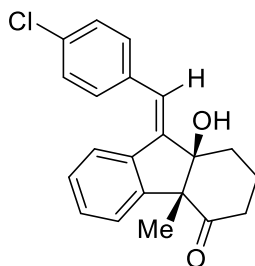

Purified by chromatography on silica gel, eluting with ethyl acetate/petroleum ether 1:5 (v/v); white solid, Mp = 98-99 °C; 43 mg, 64% yield;  $[\alpha]_D^{20} = -242.1$  ( $c$  0.5,  $\text{CH}_2\text{Cl}_2$ ), 73% ee [Phenomenex Lux 5u Cellulose-1 column (25 cm  $\times$  0.46 cm ID),  $n$ -hexane/ $i$ -PrOH = 90/10, 0.7 mL/min, 254 nm;  $t_{\text{major}} = 12.4$  min,  $t_{\text{minor}} = 13.7$  min];  $^1\text{H}$  NMR (500 MHz,  $\text{CDCl}_3$ )  $\delta$  7.35 (d,  $J = 8.5$  Hz, 2H), 7.32-7.30 (m, 3H), 7.23-7.19 (m, 1H), 7.10-7.07 (m, 1H), 7.04 (d,  $J = 7.5$  Hz, 1H), 6.68 (s, 1H), 2.49-2.44 (m, 1H), 2.34-2.27 (m, 2H), 2.06-1.99 (m, 2H), 1.92-1.86 (m, 1H), 1.78-1.74 (m, 1H), 1.39 (s, 3H).  $^{13}\text{C}$  NMR (125 MHz,  $\text{CDCl}_3$ )  $\delta$  211.3, 147.5, 147.2, 135.7, 135.2, 133.1, 129.6, 129.4, 128.7, 127.5, 125.1, 123.3, 121.7, 88.0, 61.9, 38.9, 36.1, 20.8, 20.1. HRMS  $m/z$  (ESI+): Calculated for  $\text{C}_{21}\text{H}_{19}\text{ClO}_2\text{Na}^+$  ( $[\text{M}+\text{Na}]^+$ ) 361.0966, found 361.0963.

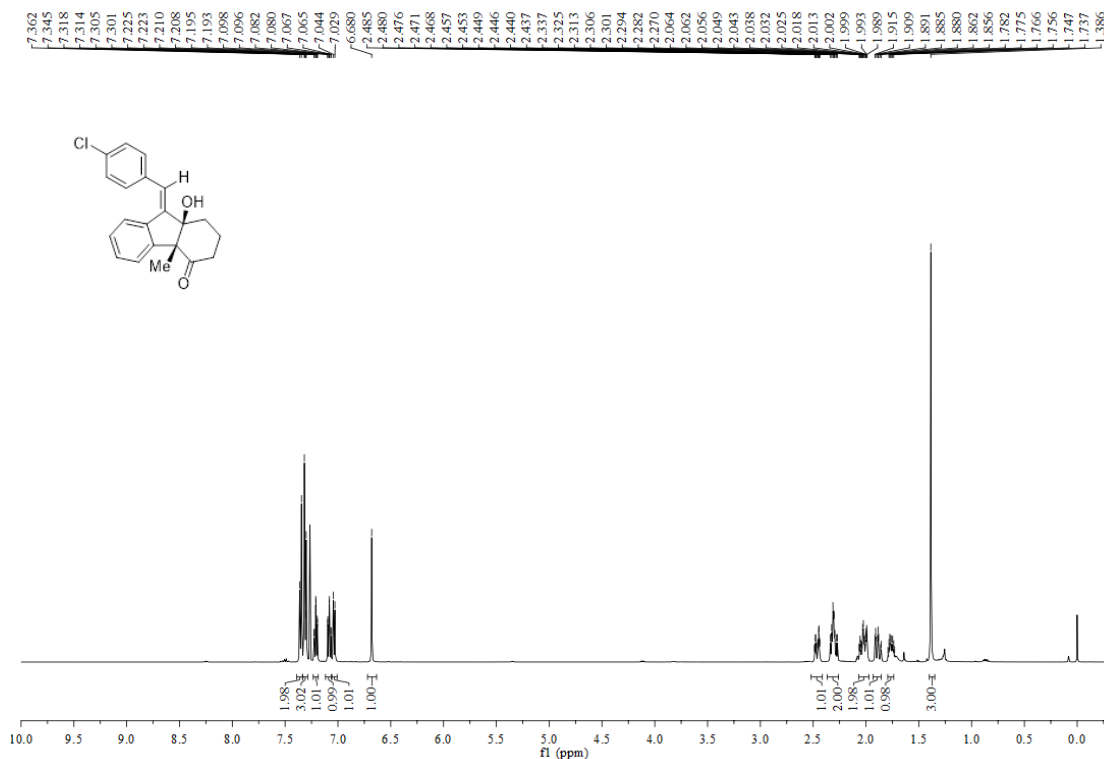

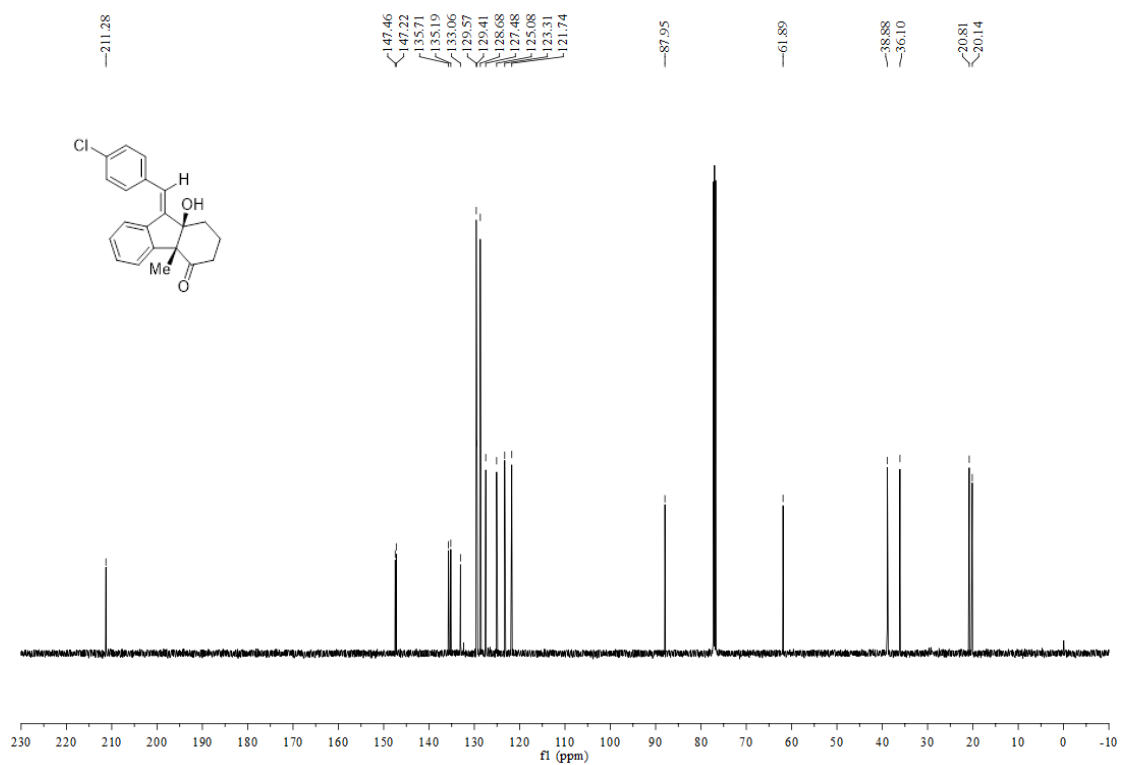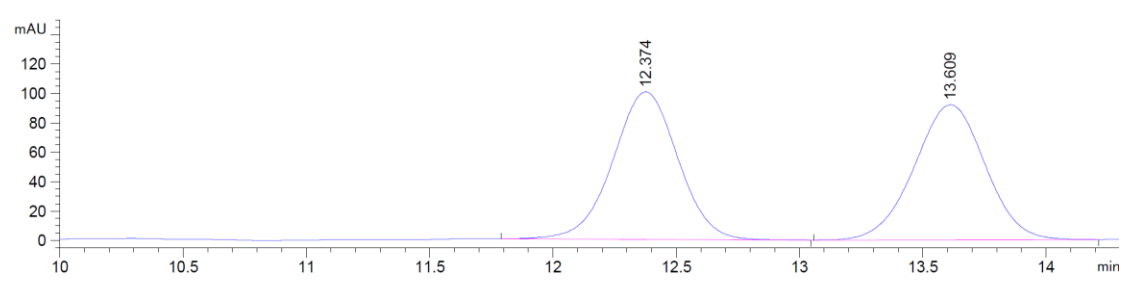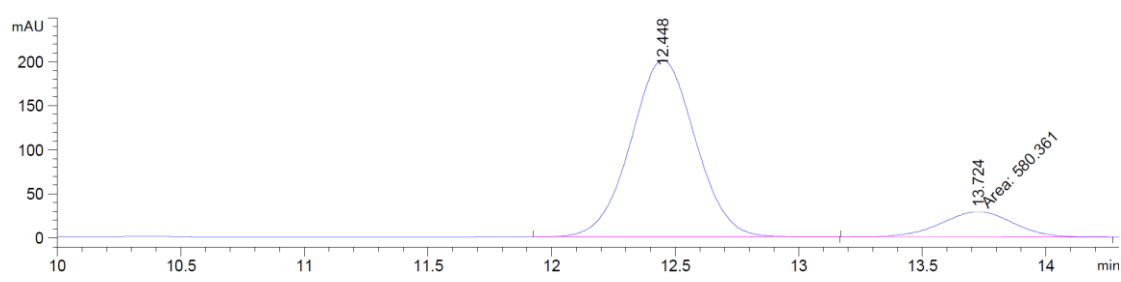

Signal 1: DAD1 A, Sig=254,4 Ref=360,100

| Peak # | RetTime [min] | Type | Width [min] | Area [mAU*s] | Height [mAU] | Area %  |
|--------|---------------|------|-------------|--------------|--------------|---------|
| 1      | 12.448        | BB   | 0.2798      | 3648.80273   | 200.98268    | 86.2772 |
| 2      | 13.724        | MM   | 0.3362      | 580.36121    | 28.77378     | 13.7228 |



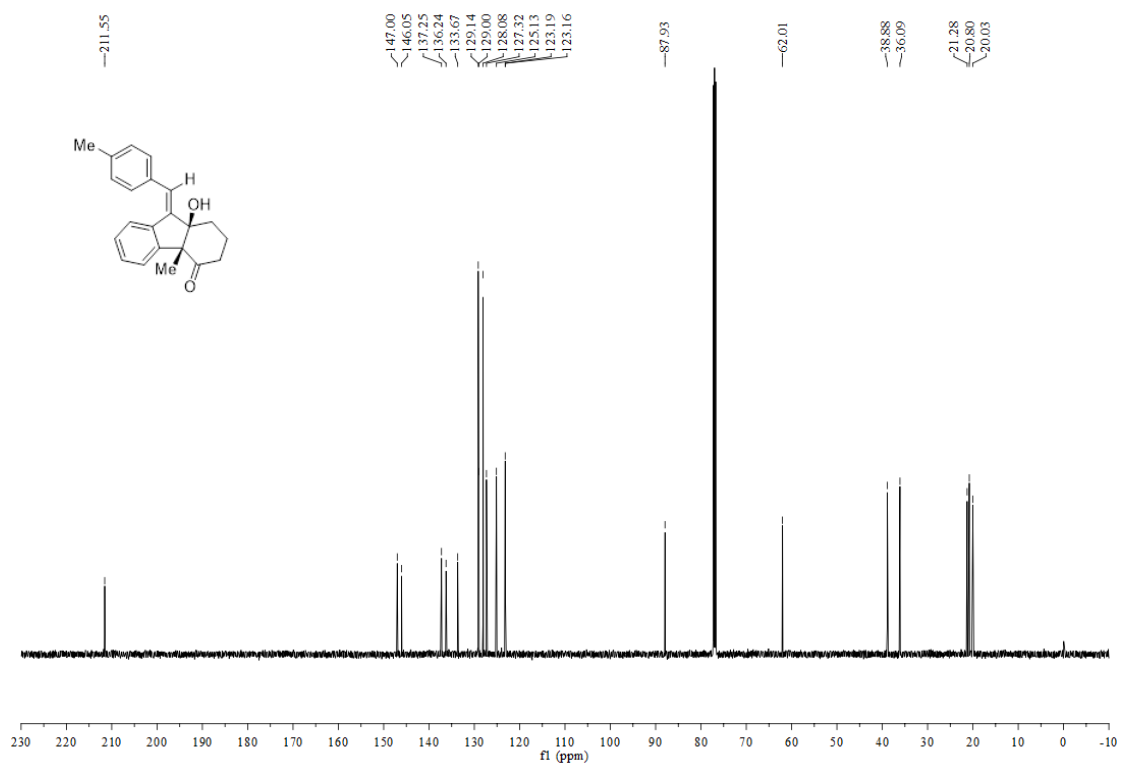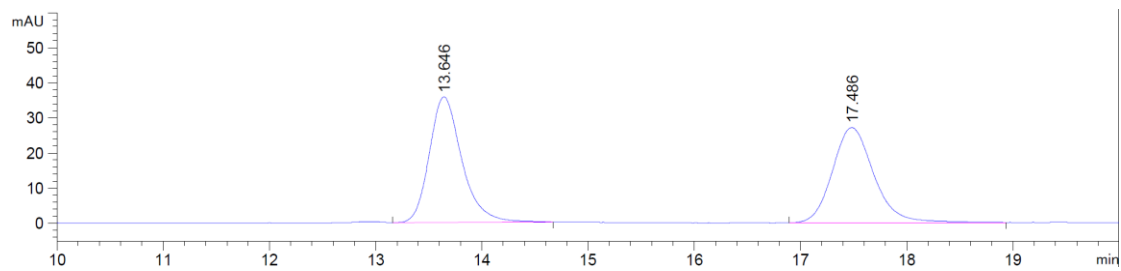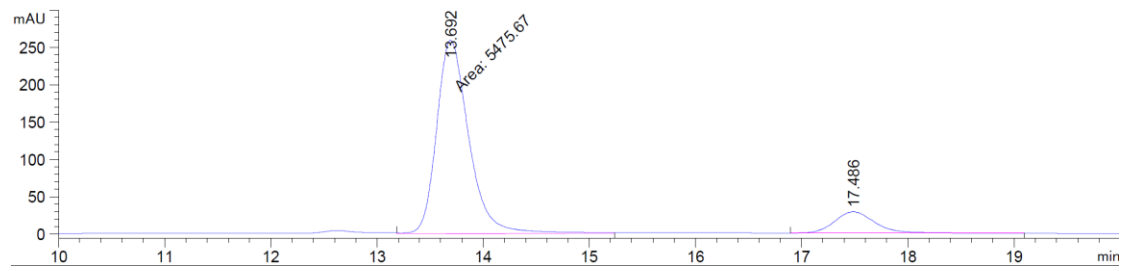

Signal 1: DAD1 A, Sig=254,4 Ref=360,100

| Peak # | RetTime [min] | Type | Width [min] | Area [mAU*s] | Height [mAU] | Area %  |
|--------|---------------|------|-------------|--------------|--------------|---------|
| 1      | 13.692        | MM   | 0.3525      | 5475.66504   | 258.86172    | 87.7750 |
| 2      | 17.486        | BB   | 0.4090      | 762.63354    | 28.42876     | 12.2250 |



**(4aR,9aR)-9a-Hydroxy-4a-methyl-9-((E)-2-methylbenzylidene)-1,2,3,4a,9,9a-hexahydro-4H-fluoren-4-one (2an)**

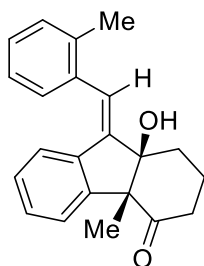

Purified by chromatography on silica gel, eluting with ethyl acetate/petroleum ether 1:5 (v/v); yellow oil; 36 mg, 57% yield;  $[\alpha]_D^{20} = -174.0$  ( $c$  0.5,  $\text{CH}_2\text{Cl}_2$ ), 87% ee [Phenomenex Lux 5u Cellulose-1 column (25 cm  $\times$  0.46 cm ID),  $n$ -hexane/ $i$ -PrOH = 90/10, 0.7 mL/min, 254 nm;  $t_{\text{major}} = 16.7$  min,  $t_{\text{minor}} = 20.3$  min];  $^1\text{H}$  NMR (600 MHz,  $\text{CDCl}_3$ )  $\delta$  7.27 (d,  $J = 7.2$  Hz, 1H), 7.24-7.22 (m, 2H), 7.17-7.14 (m, 2H), 7.02 (d,  $J = 7.8$  Hz, 1H), 6.98 (t,  $J = 7.2$  Hz, 1H), 6.88 (d,  $J = 7.8$  Hz, 1H), 6.78 (s, 1H), 2.48-2.45 (m, 1H), 2.35-2.32 (m, 2H), 2.27 (s, 3H), 2.07-2.04 (m, 2H), 2.00-1.98 (m, 1H), 1.78-1.74 (m, 1H), 1.39 (s, 3H).  $^{13}\text{C}$  NMR (150 MHz,  $\text{CDCl}_3$ )  $\delta$  211.5, 147.1, 146.8, 136.3, 136.1, 136.0, 130.2, 129.0, 128.3, 127.6, 125.8, 125.0, 123.1, 122.4, 87.4, 62.0, 38.8, 36.7, 20.7, 20.2, 19.8. HRMS  $m/z$  (ESI $^+$ ): Calculated for  $\text{C}_{22}\text{H}_{22}\text{O}_2\text{Na}^+$  ( $[\text{M}+\text{Na}]^+$ ) 341.1512, found 341.1514.

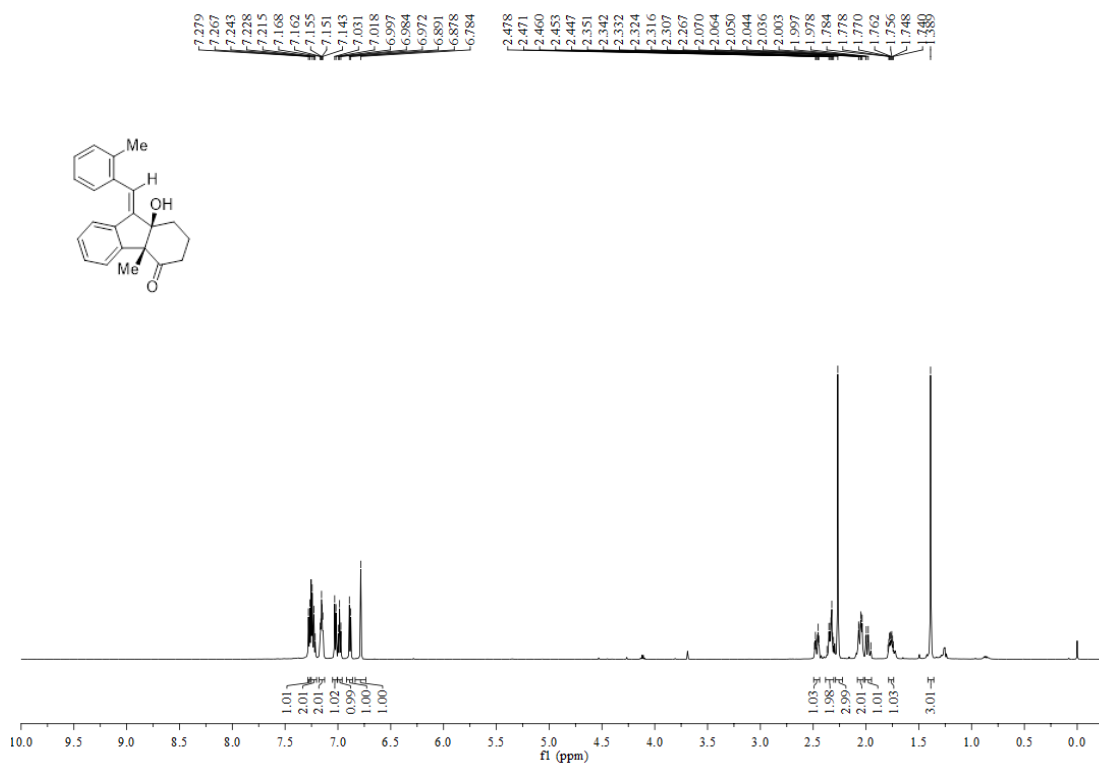

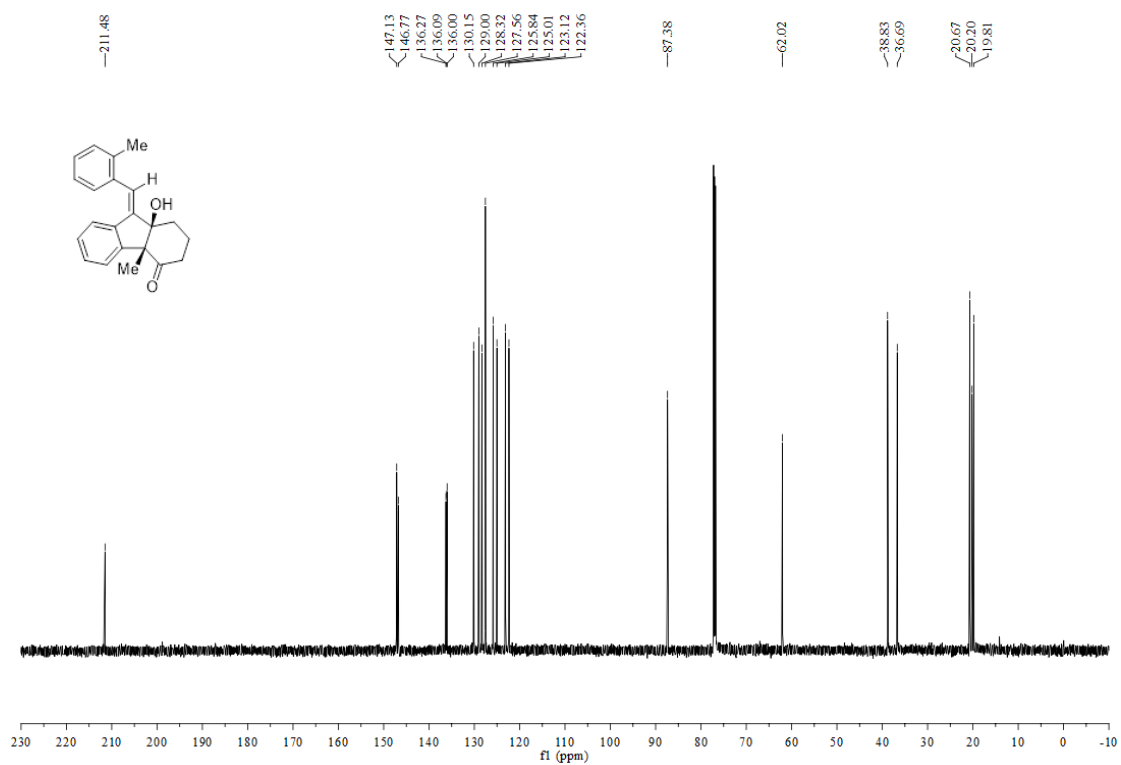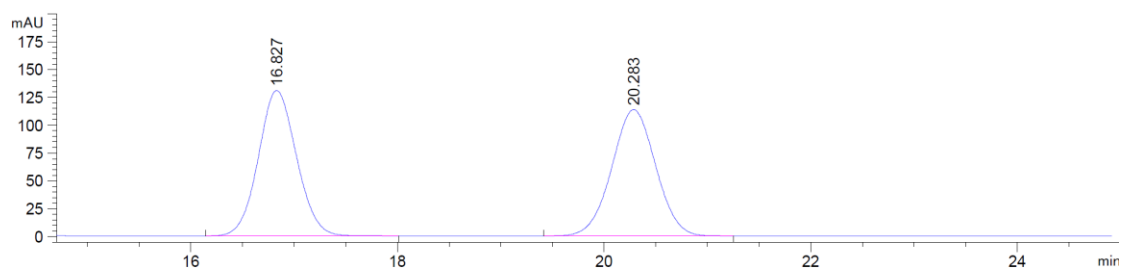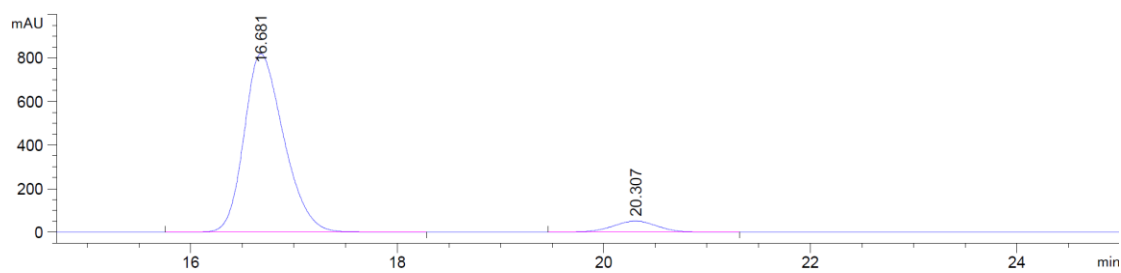

Signal 1: DAD1 A, Sig=254,4 Ref=360,100

| Peak # | RetTime [min] | Type | Width [min] | Area [mAU*s] | Height [mAU] | Area %  |
|--------|---------------|------|-------------|--------------|--------------|---------|
| 1      | 16.681        | BB   | 0.4046      | 2.17954e4    | 818.73413    | 93.5451 |
| 2      | 20.307        | BB   | 0.4604      | 1503.95581   | 50.65180     | 6.4549  |

**(3aR,9aR)-4-((E)-Benzylidene)-3a-hydroxy-9a-methyl-2,3,3a,4,9,9a-hexahydro-1H-cyclopenta[b]naphthalen-1-one (2ao)**

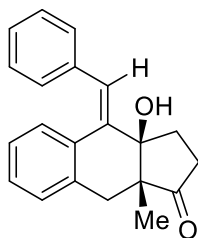

Purified by chromatography on silica gel, eluting with ethyl acetate/petroleum ether 1:5 (v/v); yellow oil; 14 mg, 23% yield;  $[\alpha]_D^{20} = -182.5$  (*c* 0.5, CH<sub>2</sub>Cl<sub>2</sub>), 73% ee [Phenomenex Lux 5u Amylose-2 column (25 cm × 0.46 cm ID), *n*-hexane/*i*-PrOH = 90/10, 0.7 mL/min, 254 nm;  $t_{\text{minor}} = 10.5$  min,  $t_{\text{major}} = 15.5$  min]; <sup>1</sup>H NMR (600 MHz, CDCl<sub>3</sub>)  $\delta$  7.22-7.19 (m, 2H), 7.18-7.16 (m, 3H), 7.14-7.09 (m, 3H), 7.05 (s, 1H), 6.91 (t, *J* = 6.0 Hz, 1H), 2.92 (d, *J* = 15.6 Hz, 1H), 2.68 (d, *J* = 15.6 Hz, 1H), 2.52-2.48 (m, 1H), 2.21-2.16 (m, 1H), 2.15-2.07 (m, 2H), 1.95 (s, 1H), 1.13 (s, 3H). <sup>13</sup>C NMR (150 MHz, CDCl<sub>3</sub>)  $\delta$  220.3, 141.9, 137.2, 135.8, 134.0, 129.4, 129.0, 128.3, 128.2, 128.1, 127.0, 126.0, 125.4, 82.5, 53.9, 37.8, 35.6, 34.5, 17.7. HRMS *m/z* (ESI<sup>+</sup>): Calculated for C<sub>21</sub>H<sub>21</sub>O<sub>2</sub><sup>+</sup> ([M+H]<sup>+</sup>) 305.1536, found 305.1533.

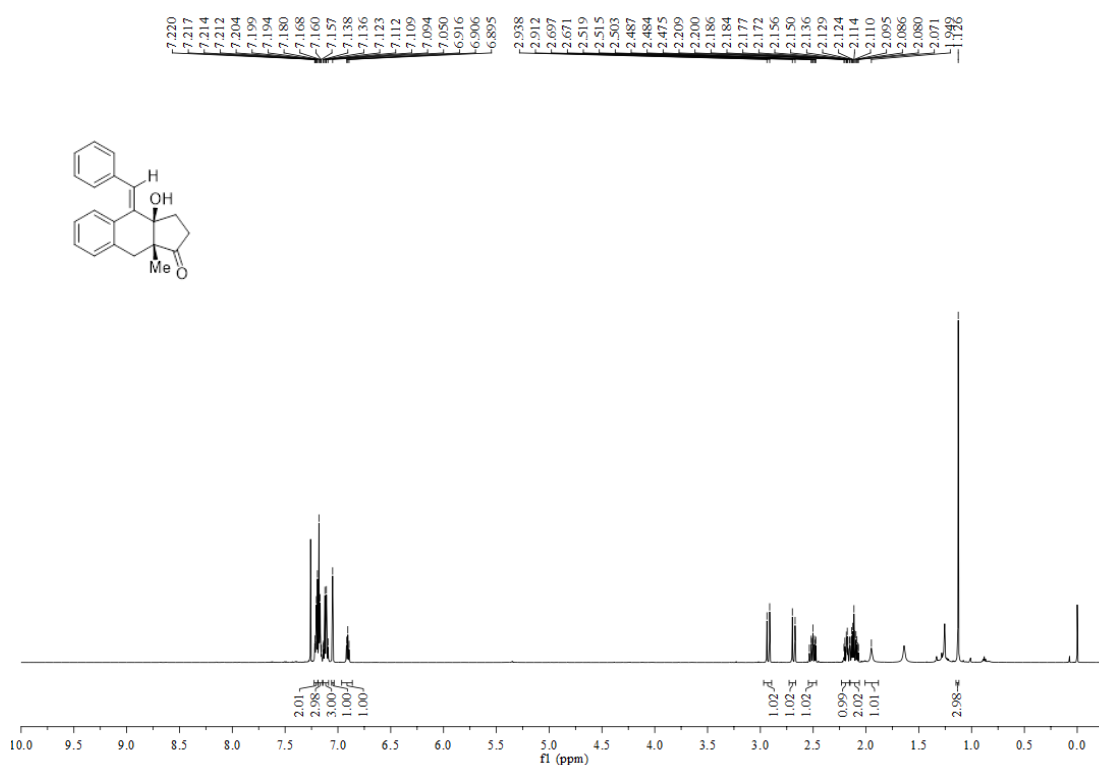

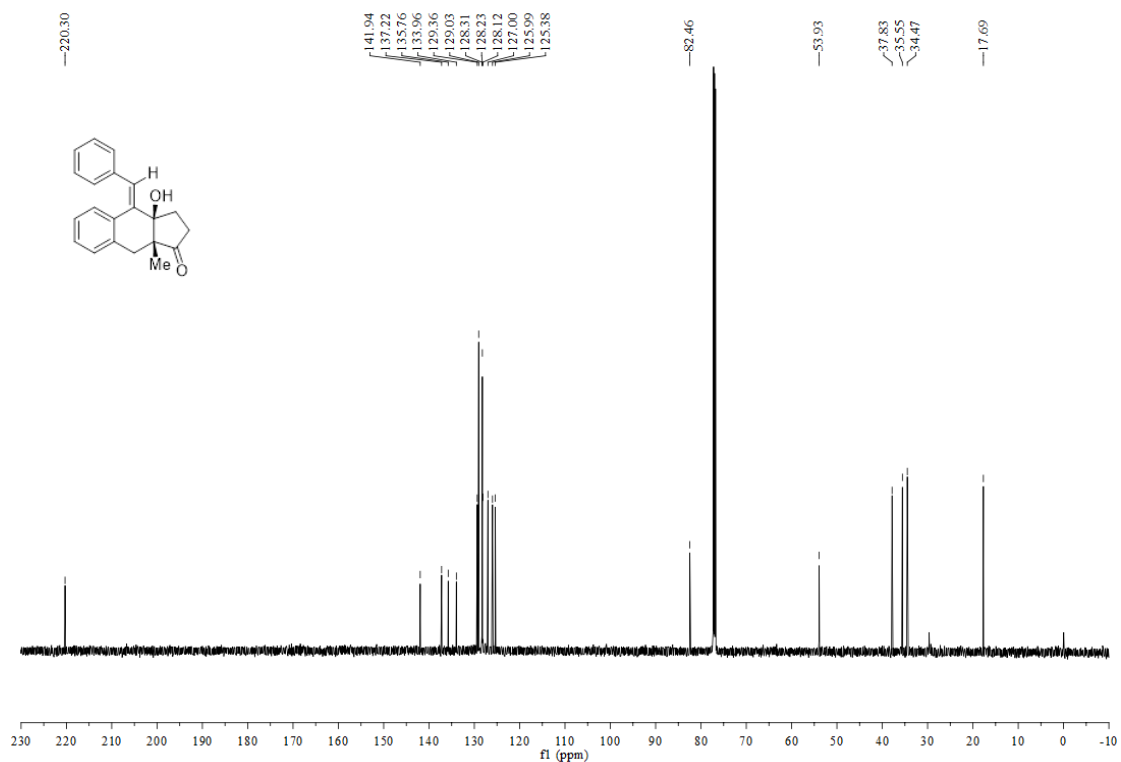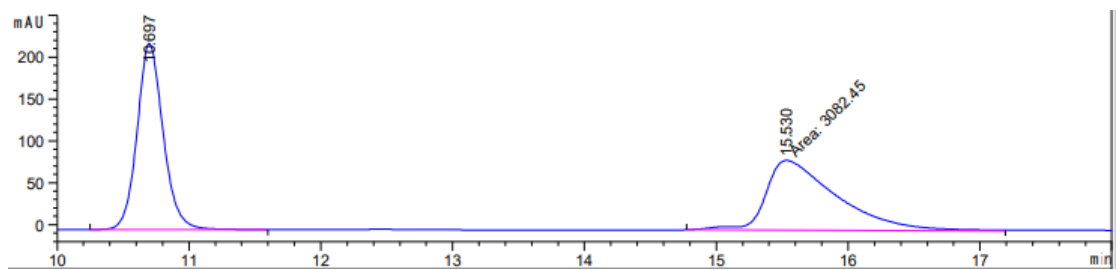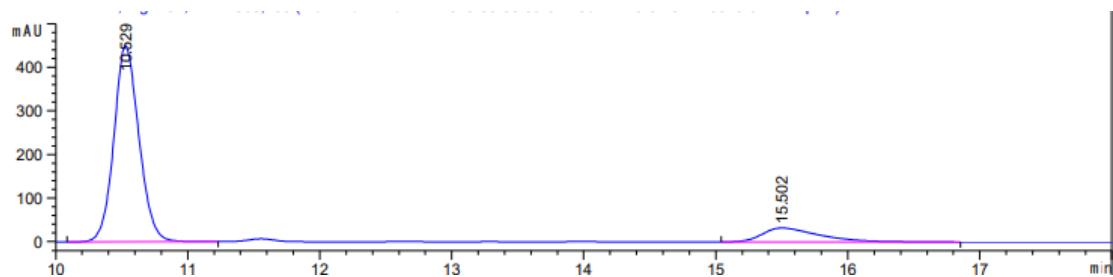

Signal 1: DAD1 A, Sig=254,4 Ref=360,100

| Peak # | RetTime [min] | Type | Width [min] | Area [mAU*s] | Height [mAU] | Area %  |
|--------|---------------|------|-------------|--------------|--------------|---------|
| 1      | 10.529        | BB   | 0.1999      | 5930.41650   | 449.69058    | 86.2230 |
| 2      | 15.502        | BB   | 0.4361      | 947.57837    | 31.76168     | 13.7770 |

**(3*aR*,8*aR*)-8*a*-Hydroxy-3*a*-methyl-8-(2-methylprop-1-en-1-ylidene)-1,3*a*,8,8*a*-tetrahydrocyclopenta[*a*]inden-3(2*H*)-one (2*ap*)**

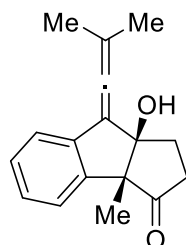

Purified by chromatography on silica gel, eluting with ethyl acetate/petroleum ether 1:5 (v/v); yellow solid, Mp = 74-75 °C; 46 mg, 90% yield;  $[\alpha]_D^{20} = -102.0$  (*c* 0.5, CH<sub>2</sub>Cl<sub>2</sub>), 76% ee [Phenomenex Lux 5u Amylose-2 column (25 cm × 0.46 cm ID), *n*-hexane/*i*-PrOH = 80/20, 0.7 mL/min, 254 nm;  $t_{\text{major}} = 6.1$  min,  $t_{\text{minor}} = 6.6$  min]; <sup>1</sup>H NMR (500 MHz, CDCl<sub>3</sub>) δ 7.33-7.30 (m, 1H), 7.24-7.20 (m, 3H), 2.49-2.43 (m, 1H), 2.34-2.29 (m, 1H), 2.27-2.20 (m, 1H), 2.14-2.08 (m, 2H), 1.92 (s, 3H), 1.90 (s, 3H), 1.38 (s, 3H). <sup>13</sup>C NMR (125 MHz, CDCl<sub>3</sub>) δ 216.5, 196.2, 142.2, 137.2, 128.6, 128.3, 124.2, 122.6, 112.3, 105.3, 87.8, 62.5, 37.0, 33.5, 20.9, 20.7, 16.4. HRMS *m/z* (ESI<sup>+</sup>): Calculated C<sub>17</sub>H<sub>18</sub>O<sub>2</sub>Na<sup>+</sup> ([M+Na]<sup>+</sup>) 277.1199, found 277.1199.

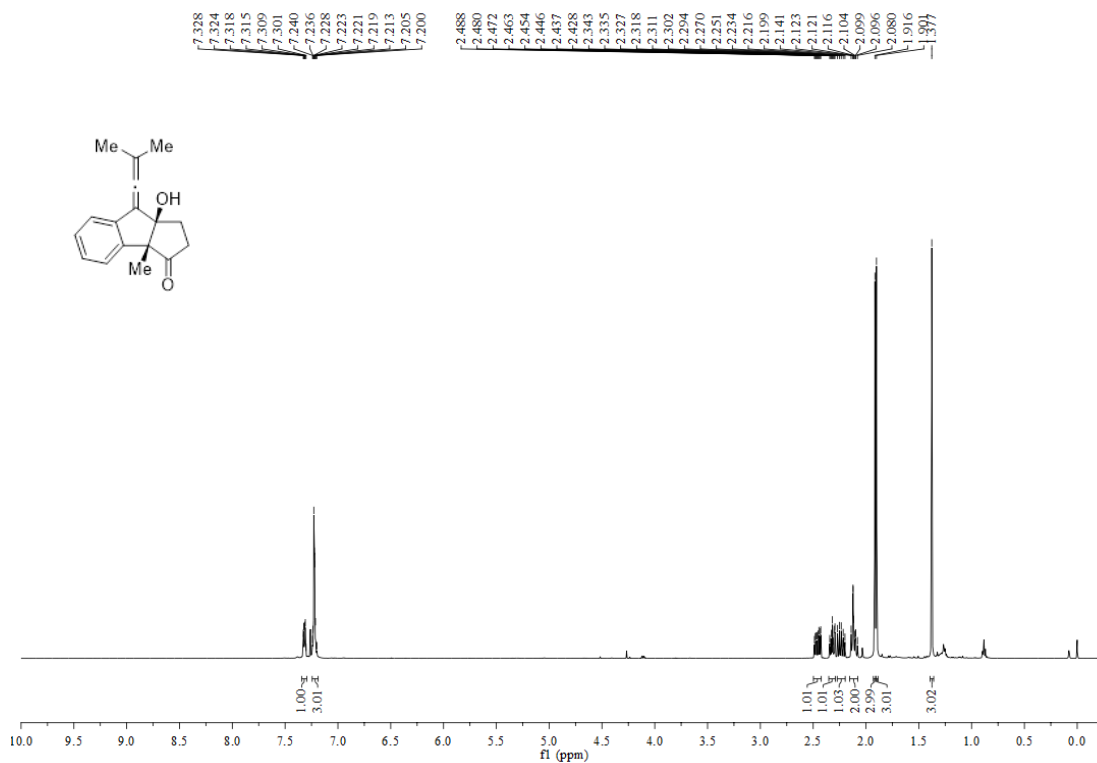

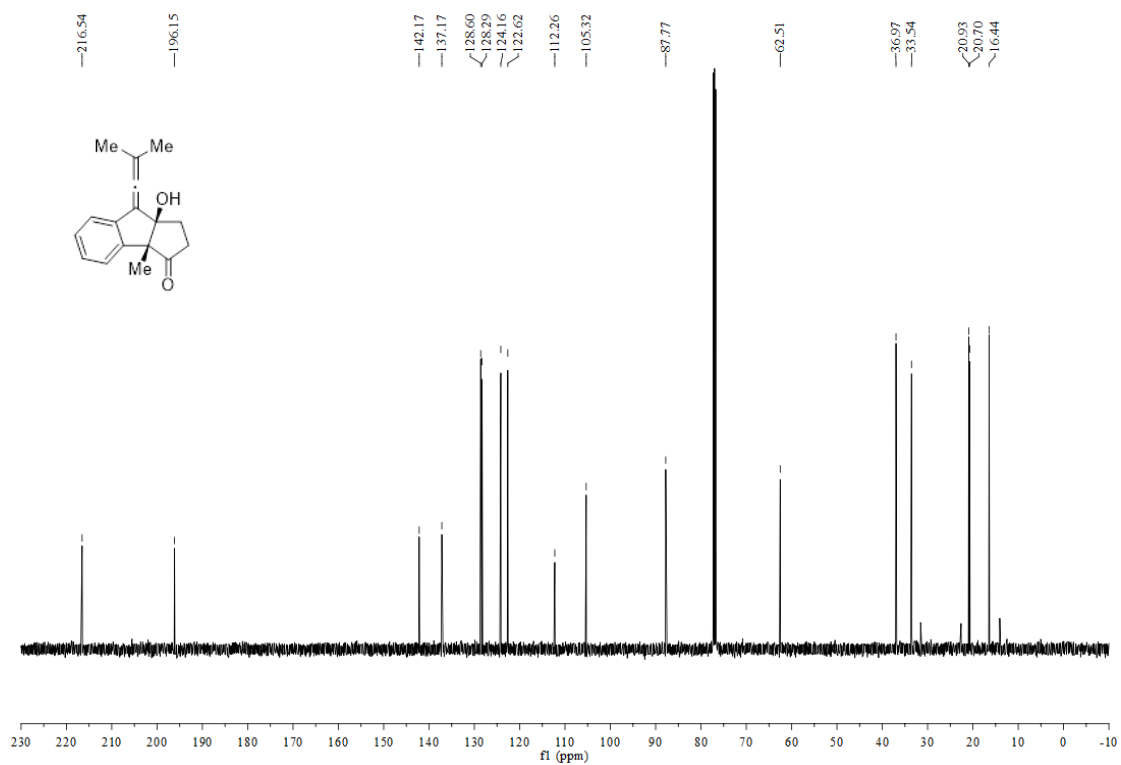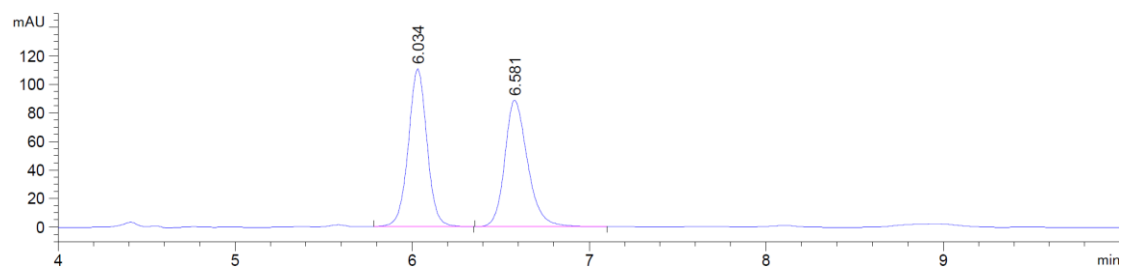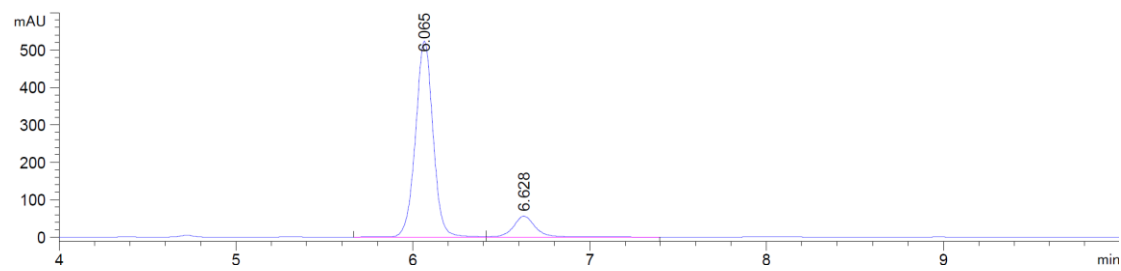

Signal 1: DAD1 A, Sig=254,4 Ref=360,100

| Peak # | RetTime [min] | Type | Width [min] | Area [mAU*s] | Height [mAU] | Area %  |
|--------|---------------|------|-------------|--------------|--------------|---------|
| 1      | 6.065         | VV R | 0.1063      | 3608.82349   | 524.48029    | 88.1408 |
| 2      | 6.628         | VB   | 0.1292      | 485.56131    | 55.95907     | 11.8592 |

## 4. Synthetic transformations

### 4.1 The Wittig reaction of 2a

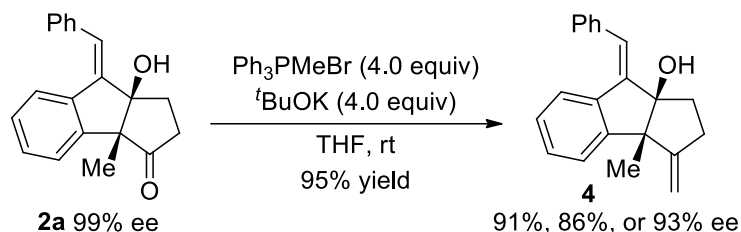

To a dried Schlenk flask was charged with Ph<sub>3</sub>PMeBr (4.0 equiv, 0.8 mmol), <sup>t</sup>BuOK (4.0 equiv, 0.8 mmol), and THF (2 mL) under N<sub>2</sub> atmosphere. The resulting yellow mixture was stirred at 0 °C for 30 min, to which a solution of **2a** (0.2 mmol) in anhydrous THF (2 mL) was then added via a syringe. After stirring at room temperature for 12 h, the reaction mixture was quenched by saturated aq. NH<sub>4</sub>Cl (2 mL), extracted with ethyl acetate (2 mL×3), dried over Na<sub>2</sub>SO<sub>4</sub>, and concentrated under reduced pressure. The crude was purified by chromatography on silica gel, eluting with ethyl acetate/petroleum ether 1:10 (v/v), to afford **4**. Colorless oil; For one of the results: 38 mg, 95% yield; [α]<sub>D</sub><sup>20</sup> = -208.4 (c 0.5, CH<sub>2</sub>Cl<sub>2</sub>), 93% ee [Phenomenex Lux 5u Amylose-2 column (25 cm × 0.46 cm ID), *n*-hexane/*i*-PrOH = 80/20, 0.7 mL/min, 254 nm; *t*<sub>minor</sub> = 5.5 min, *t*<sub>major</sub> = 5.7 min]; <sup>1</sup>H NMR (500 MHz, CDCl<sub>3</sub>) δ 7.43 (d, *J* = 7.5 Hz, 2H), 7.34 (t, *J* = 7.5 Hz, 2H), 7.27-7.23 (m, 3H), 7.19 (t, *J* = 7.5 Hz, 1H), 6.99-6.96 (m, 1H), 6.84 (s, 1H), 5.16 (t, *J* = 2.0 Hz, 1H), 5.06 (t, *J* = 1.5 Hz, 1H), 2.62-2.58 (m, 1H), 2.30-2.27 (m, 1H), 2.00-1.91 (m, 3H), 1.35 (s, 3H). <sup>13</sup>C NMR (150 MHz, CDCl<sub>3</sub>) δ 157.1, 150.7, 146.9, 137.4, 135.6, 129.0, 128.4, 128.3, 127.2, 126.6, 124.5, 123.7, 123.3, 106.3, 92.3, 59.2, 38.1, 31.8, 21.3. HRMS *m/z* (ESI<sup>+</sup>): Calculated for: C<sub>21</sub>H<sub>20</sub>NaO<sup>+</sup> ([M+Na]<sup>+</sup>) 311.1406, found 311.1405.

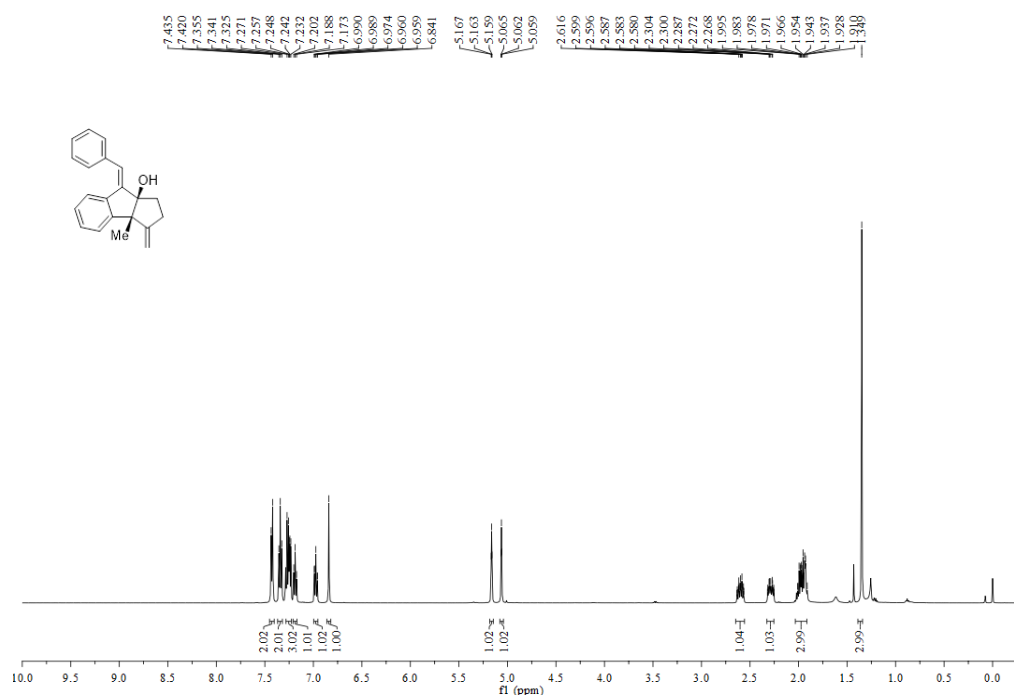

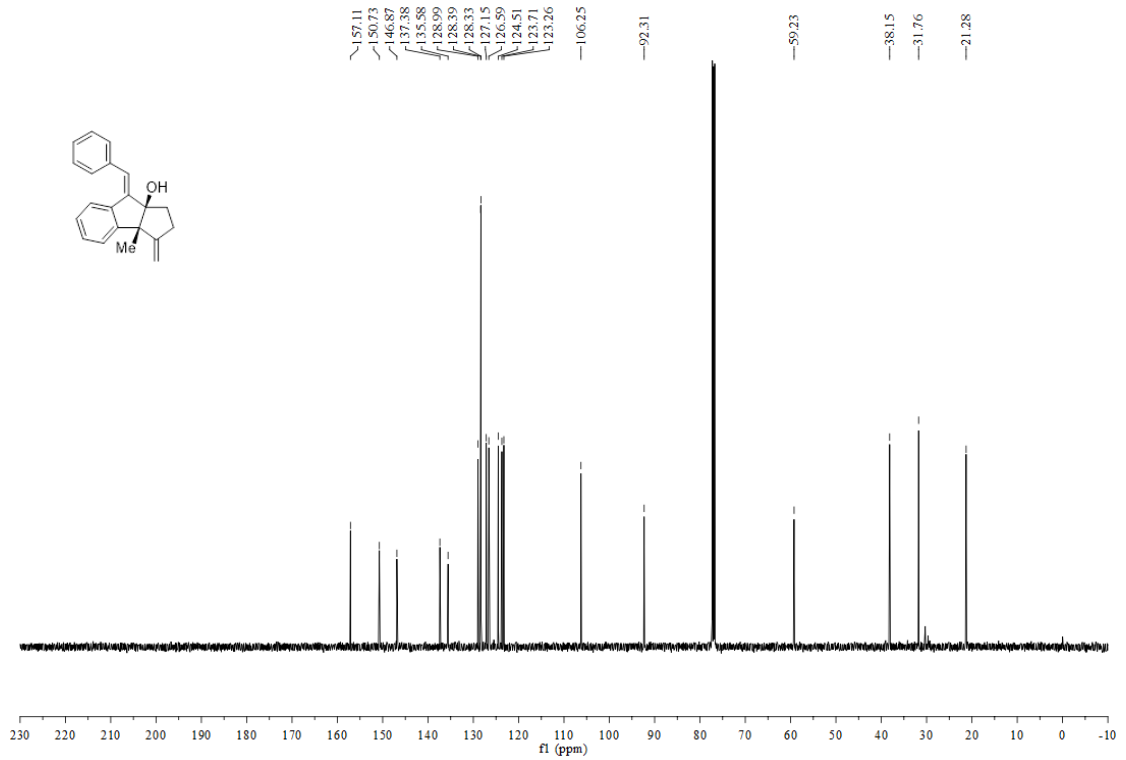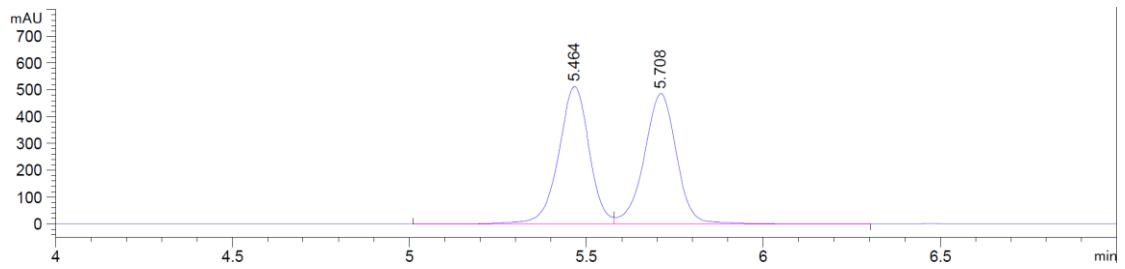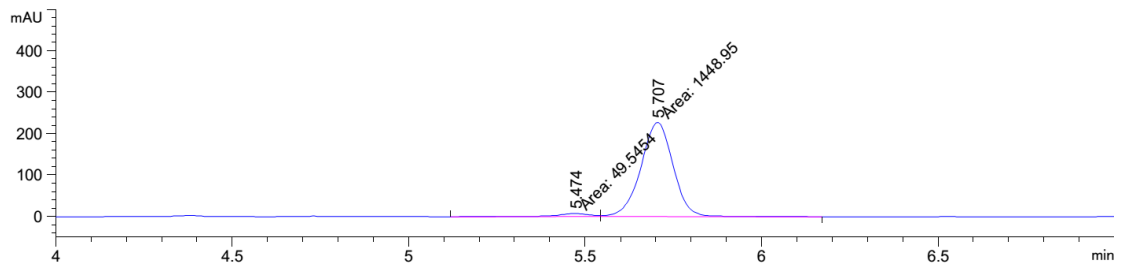

Signal 1: DAD1 A, Sig=254,4 Ref=360,100

| Peak # | RetTime [min] | Type | Width [min] | Area [mAU*s] | Height [mAU] | Area %  |
|--------|---------------|------|-------------|--------------|--------------|---------|
| 1      | 5.474         | MM   | 0.1112      | 49.54544     | 7.42865      | 3.3063  |
| 2      | 5.707         | MM   | 0.1059      | 1448.95251   | 228.02374    | 96.6937 |



## 4.2 MOM-protection of compound **2a**

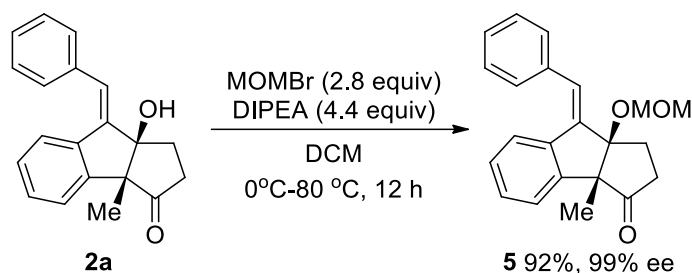

To a solution of **2a** (1.0 equiv, 0.2 mmol) in DCM (4 mL) were added DIPEA (4.4 equiv) and MOMBr (2.8 equiv) at 0 °C, respectively. The reaction mixture was stirred at 60 °C until the reaction was completed. The solution was then quenched by saturated aq.  $\text{NH}_4\text{Cl}$  (2 mL), extracted with DCM (2 mL $\times$ 3), dried over  $\text{Na}_2\text{SO}_4$ , and concentrated under reduced pressure. The crude was purified by chromatography on silica gel, eluting with ethyl acetate/petroleum ether 1:10 (v/v), to afford **5**. Yellow oil; 62 mg, 92% yield;  $[\alpha]_D^{20} = -63.4$  ( $c$  1.0,  $\text{CH}_2\text{Cl}_2$ ), 99% ee [Phenomenex Lux 5u Cellulose-2 column (25 cm  $\times$  0.46 cm ID),  $n$ -hexane/ $i$ -PrOH = 90/10, 0.7 mL/min, 254 nm;  $t_{\text{minor}} = 7.1$  min,  $t_{\text{major}} = 7.8$  min];  $^1\text{H NMR}$  (500 MHz,  $\text{CDCl}_3$ )  $\delta$  7.44-7.40 (m, 2H), 7.38-7.33 (m, 3H), 7.26-7.18 (m, 2H), 7.04-7.01 (m, 2H), 5.02 (d,  $J = 6.5$  Hz, 1H), 4.65 (d,  $J = 6.5$  Hz, 1H), 3.46 (s, 3H), 2.63-2.51 (m, 2H), 2.43-2.31 (m, 2H), 1.48 (s, 3H).  $^{13}\text{C NMR}$  (125 MHz,  $\text{CDCl}_3$ )  $\delta$  215.9, 145.2, 140.9, 137.5, 136.7, 129.6, 128.6, 128.2, 127.6, 127.4, 127.1, 124.2, 123.9, 93.7, 92.1, 63.0, 55.7, 37.2, 30.7, 16.2. HRMS  $m/z$  (ESI $^+$ ): Calculated for  $\text{C}_{22}\text{H}_{22}\text{O}_3\text{Na}^+$  ( $[\text{M}+\text{Na}]^+$ ) 357.1461, found 357.1462.

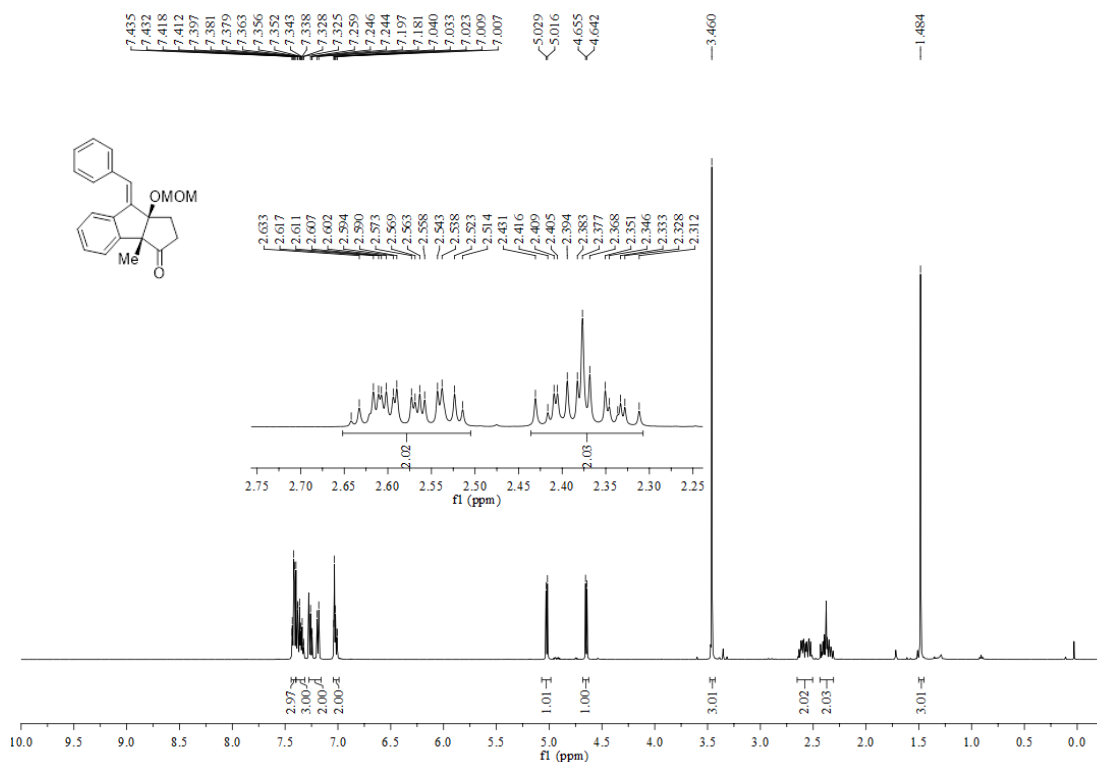

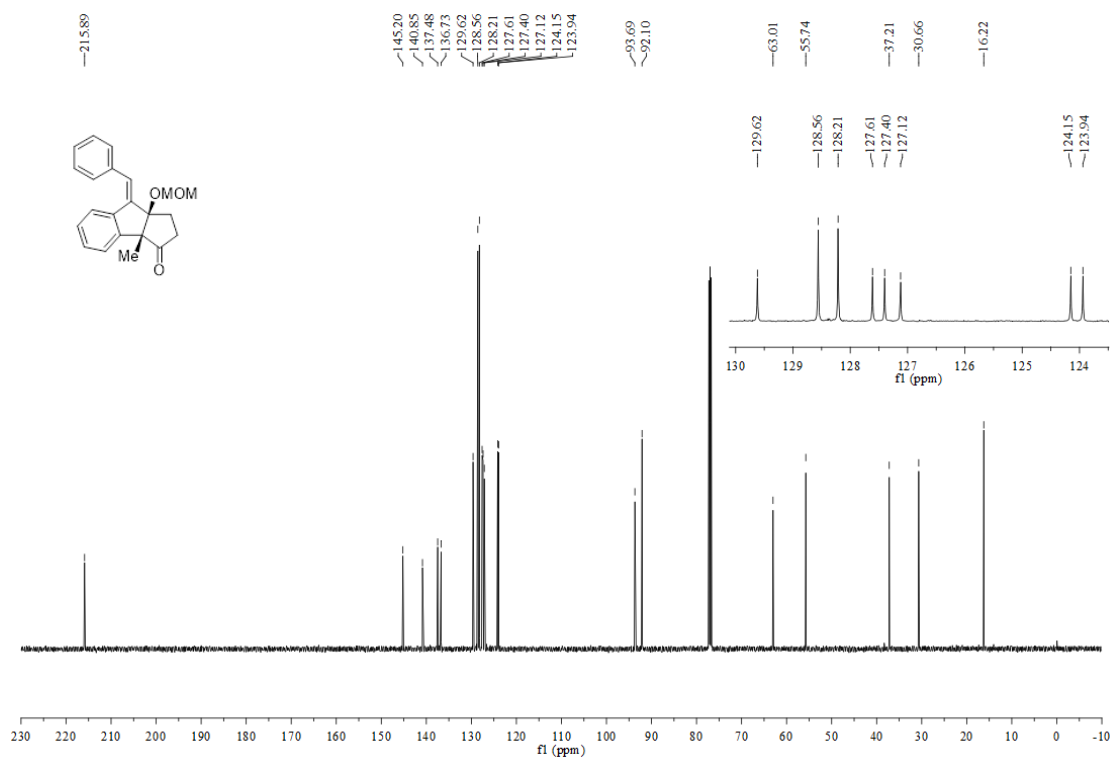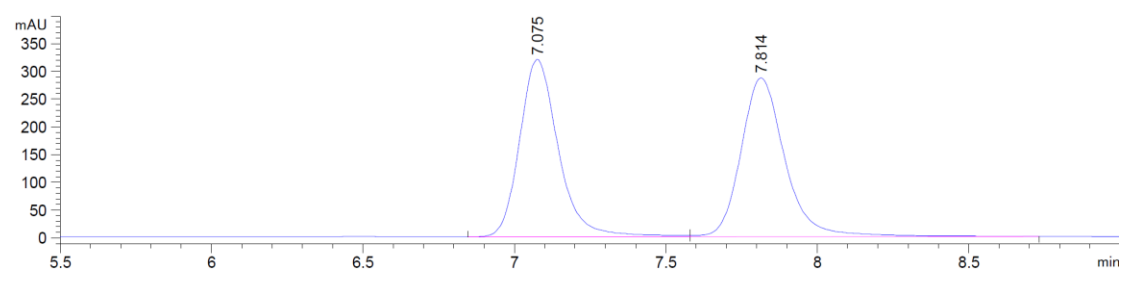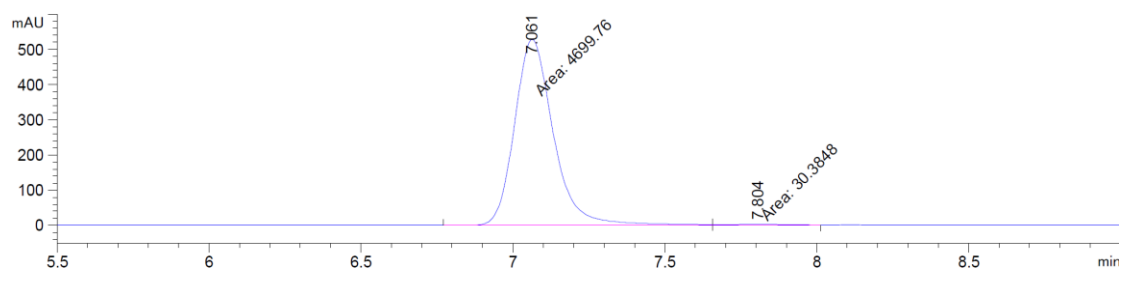

Signal 1: DAD1 A, Sig=254,4 Ref=360,100

| Peak # | RetTime [min] | Type | Width [min] | Area [mAU*s] | Height [mAU] | Area %  |
|--------|---------------|------|-------------|--------------|--------------|---------|
| 1      | 7.061         | MF   | 0.1482      | 4699.75830   | 528.38263    | 99.3576 |
| 2      | 7.804         | FM   | 0.2111      | 30.38482     | 2.39836      | 0.6424  |

### 4.3 The Wittig reaction of 5

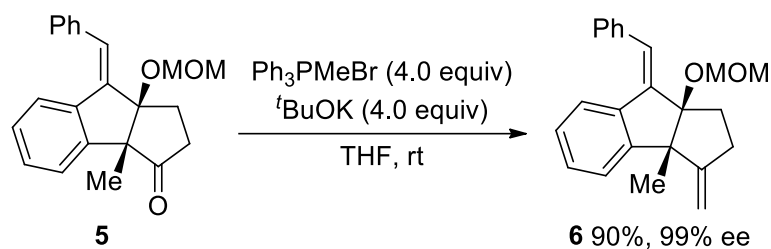

The procedure for synthesis of **4** was followed. Purified by chromatography on silica gel, eluting with ethyl acetate/petroleum ether 1:10 (v/v); yellow oil; 60 mg, 90% yield;  $[\alpha]_D^{20} = -33.9$  ( $c$  0.5,  $\text{CH}_2\text{Cl}_2$ ), 99% ee [Phenomenex Lux 5u Cellulose-1 column (25 cm  $\times$  0.46 cm ID),  $n$ -hexane/ $i$ -PrOH = 99.9/0.1, 0.7 mL/min, 254 nm;  $t_{\text{minor}} = 21.7$  min,  $t_{\text{major}} = 22.9$  min];  $^1\text{H}$  NMR (500 MHz,  $\text{CDCl}_3$ )  $\delta$  7.40 (d,  $J = 7.5$  Hz, 2H), 7.33 (t,  $J = 7.5$  Hz, 2H), 7.18 (t,  $J = 7.0$  Hz, 1H), 7.12 (d,  $J = 8.0$  Hz, 1H), 6.93 (t,  $J = 7.5$  Hz, 1H), 6.86 (s, 1H), 4.98-4.96 (m, 2H), 4.93 (s, 1H), 4.67 (d,  $J = 6.5$  Hz, 1H), 3.42 (s, 3H), 2.52-2.46 (m, 1H), 2.33-2.22 (m, 3H), 1.44 (s, 3H).  $^{13}\text{C}$  NMR (125 MHz,  $\text{CDCl}_3$ )  $\delta$  157.8, 151.3, 142.3, 137.4, 136.9, 129.0, 128.41, 128.35, 127.2, 126.4, 125.7, 124.4, 122.9, 106.6, 97.0, 92.1, 59.5, 55.5, 33.3, 31.2, 21.1. HRMS  $m/z$  (EI+): Calculated for  $\text{C}_{23}\text{H}_{24}\text{O}_2^+$  ( $[\text{M}]^+$ ) 332.1776, found 332.1775.

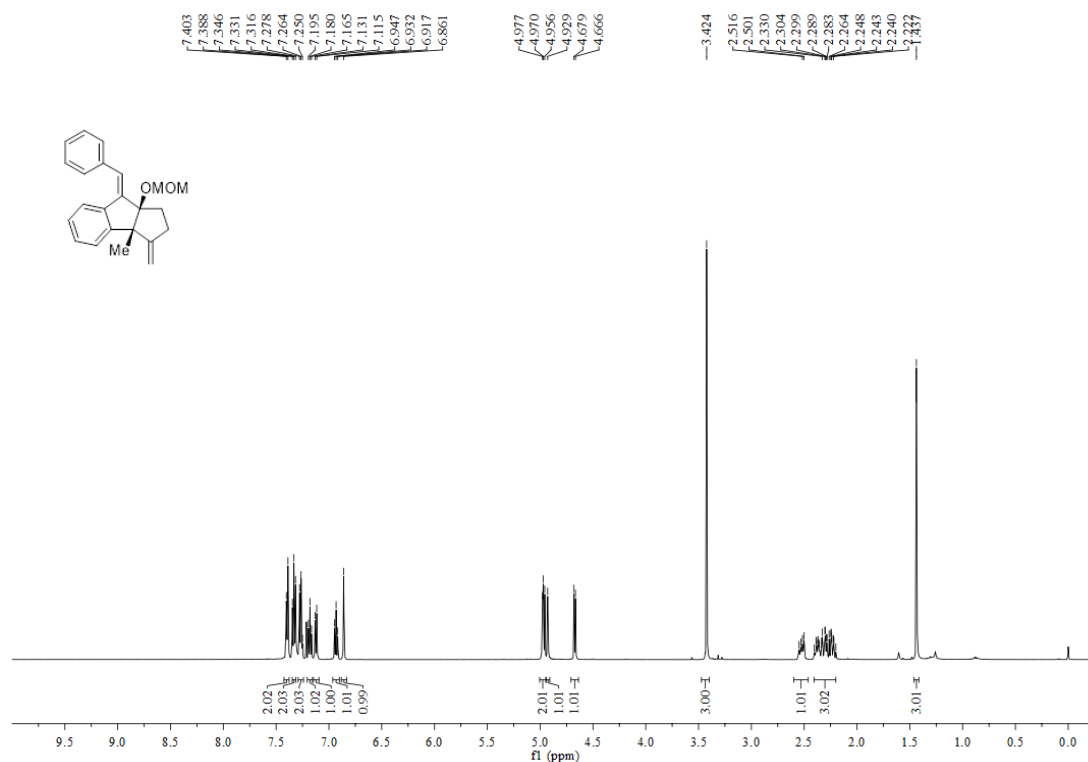

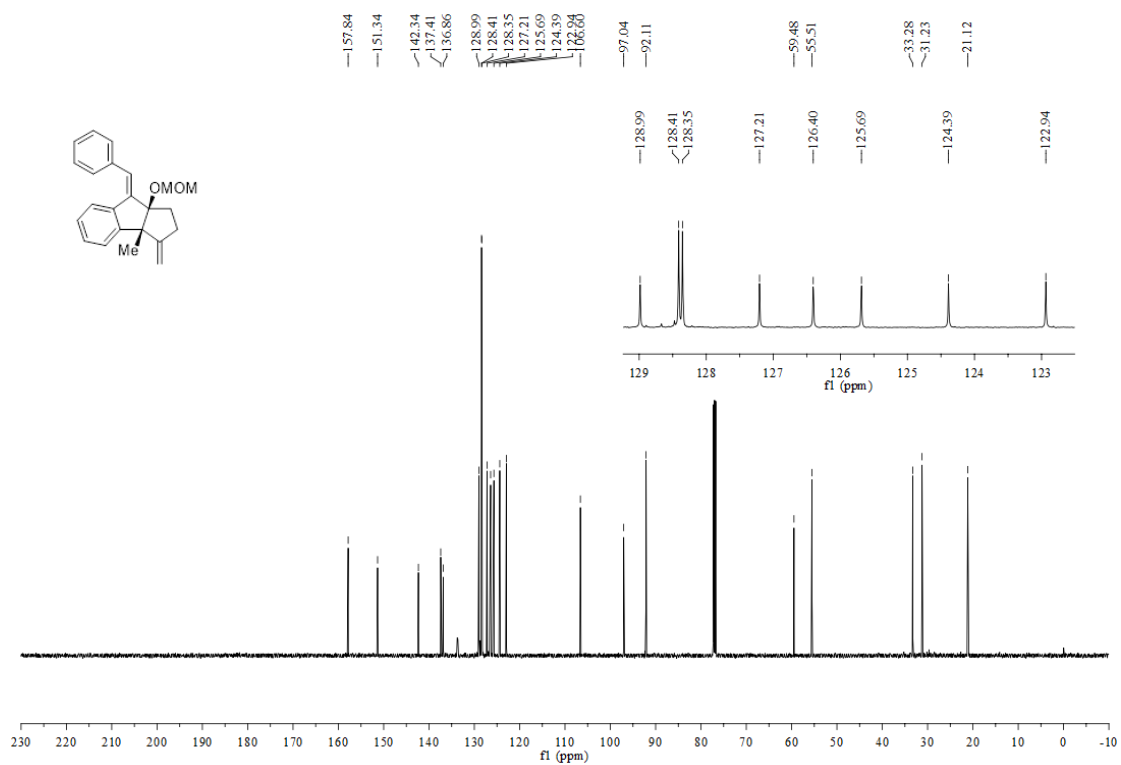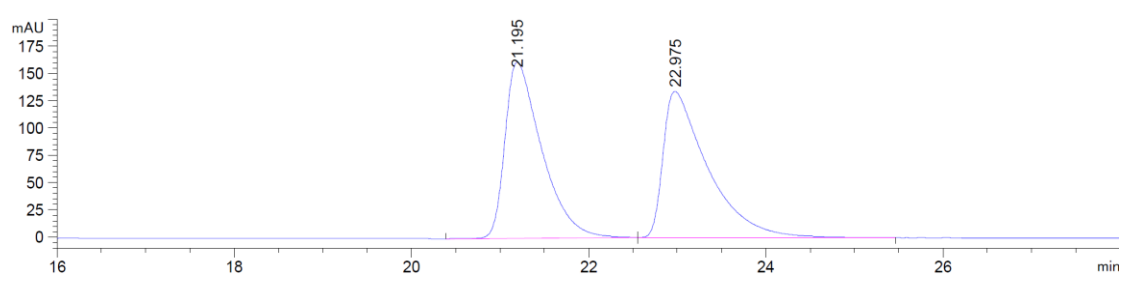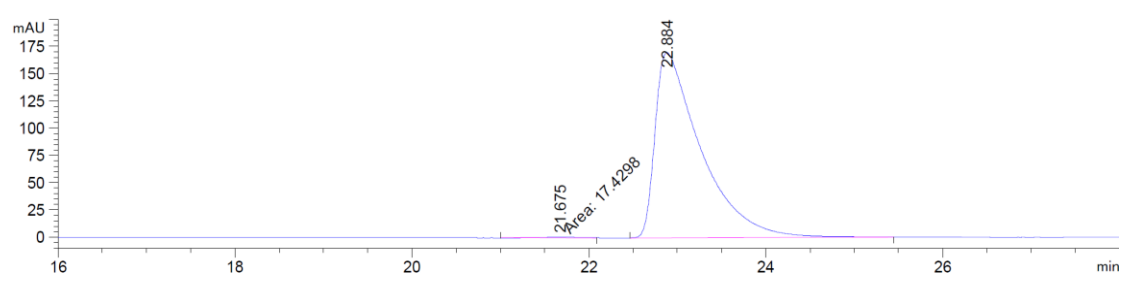

Signal 1: DAD1 A, Sig=254,4 Ref=360,100

| Peak # | RetTime [min] | Type | Width [min] | Area [mAU*s] | Height [mAU] | Area %  |
|--------|---------------|------|-------------|--------------|--------------|---------|
| 1      | 21.675        | MM   | 0.4262      | 17.42982     | 6.81659e-1   | 0.2847  |
| 2      | 22.884        | BB   | 0.5186      | 6104.57764   | 170.13115    | 99.7153 |

#### 4.4 Cyclopropanation of **6**

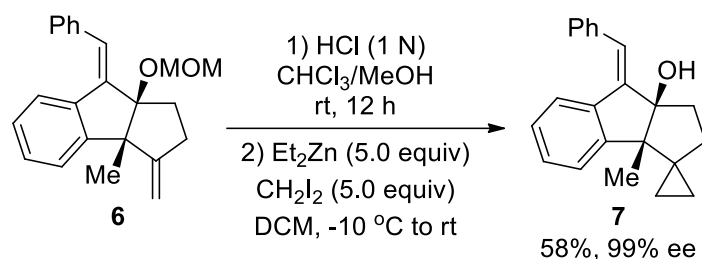

**Step 1:** To a 50 mL Schlenk flask was charged with **6** (0.2 mmol), HCl (1 N, 10 mL), CHCl<sub>3</sub> (4 mL), and MeOH (4 mL). After stirring at room temperature for 12 h, the resulting mixture was extracted with DCM, dried over Na<sub>2</sub>SO<sub>4</sub>, and concentrated under reduced pressure. The crude was then purified by flash chromatography on silica gel, eluting with ethyl acetate/petroleum ether 1:10 (v/v), to give compound **4**, which were used in the next step without further purification.

**Step 2<sup>5</sup>:** To a solution of the above crude product **4** (0.18 mmol) in anhydrous DCM at -10 °C was added Et<sub>2</sub>Zn (5.0 equiv, 1.0 mmol/L in toluene) and CH<sub>2</sub>I<sub>2</sub> (5.0 equiv) dropwise, respectively. The mixture was stirred at room temperature for 6 h. When the reaction was completed, DCM (10 mL) was then added. The diluted solution was quenched with saturated aq. NH<sub>4</sub>Cl (5 mL) followed by treated with HCl (1 N, 5 mL). The organic phase was dried over Na<sub>2</sub>SO<sub>4</sub>, and concentrated under reduced pressure. The crude was purified by chromatography on silica gel, eluting with ethyl acetate/petroleum ether 1:10 (v/v), to afford compound **7**. White solid, Mp = 88-89 °C; 35 mg, 58% yield; [α]<sub>D</sub><sup>20</sup> = -33.9 (*c* 0.5, CH<sub>2</sub>Cl<sub>2</sub>), 99% ee [Phenomenex Lux 5u Amylose-2 column (25 cm × 0.46 cm ID), *n*-hexane/*i*-PrOH = 90/10, 0.7 mL/min, 254 nm; *t*<sub>minor</sub> = 6.4 min, *t*<sub>major</sub> = 7.0 min]; <sup>1</sup>H NMR (500 MHz, CDCl<sub>3</sub>) δ 7.41 (d, *J* = 7.0 Hz, 2H), 7.35 (t, *J* = 7.5 Hz, 2H), 7.27 (t, *J* = 7.5 Hz, 1H), 7.24-7.16 (m, 3H), 6.98-6.95 (m, 1H), 6.87 (s, 1H), 2.22-2.14 (m, 2H), 1.87 (s, 1H), 1.53-1.47 (m, 1H), 1.27-1.22 (m, 1H), 1.00 (s, 3H), 0.78-0.75 (m, 1H), 0.69-0.65 (m, 1H), 0.49-0.45 (m, 1H), 0.34-0.30 (m, 1H). <sup>13</sup>C NMR (125 MHz, CDCl<sub>3</sub>) δ 152.0, 149.1, 137.7, 136.6, 128.9, 128.40, 128.35, 127.0, 126.4, 124.0, 123.9, 123.0, 92.0, 55.2, 40.4, 34.3, 30.4, 17.5, 9.0, 6.1. HRMS *m/z* (ESI<sup>+</sup>): Calculated for C<sub>22</sub>H<sub>22</sub>O<sub>2</sub>Na<sup>+</sup> ([M+Na]<sup>+</sup>) 325.1563, found 325.1566.

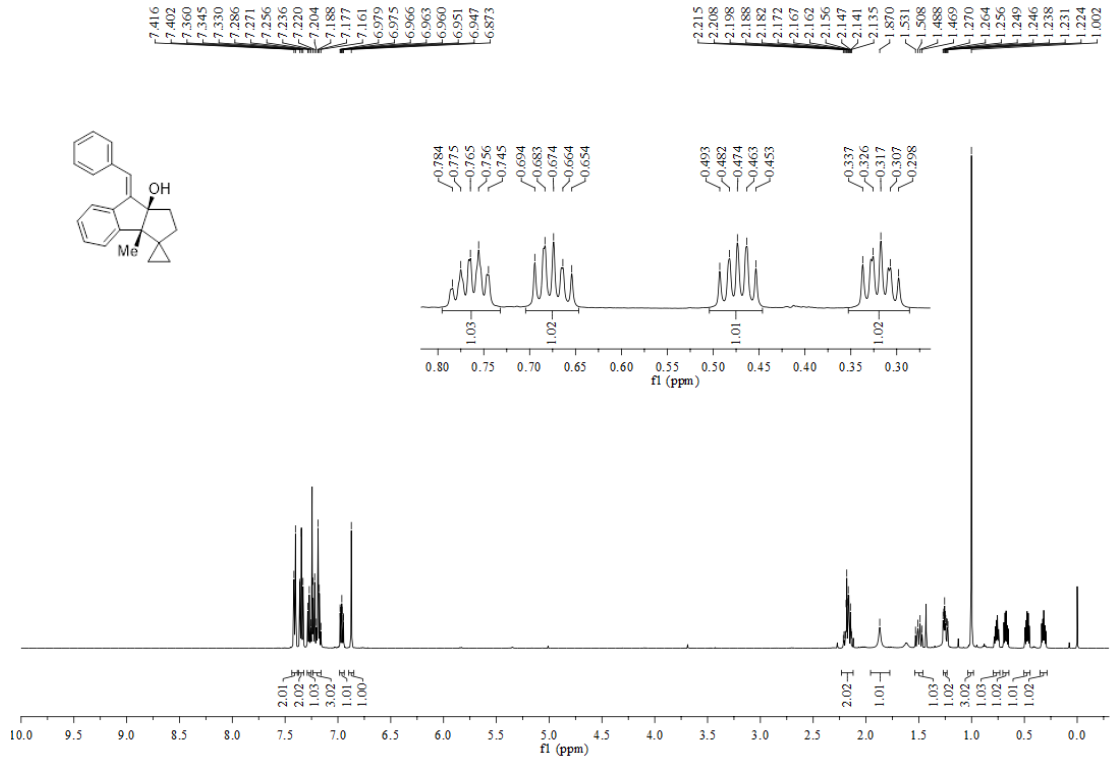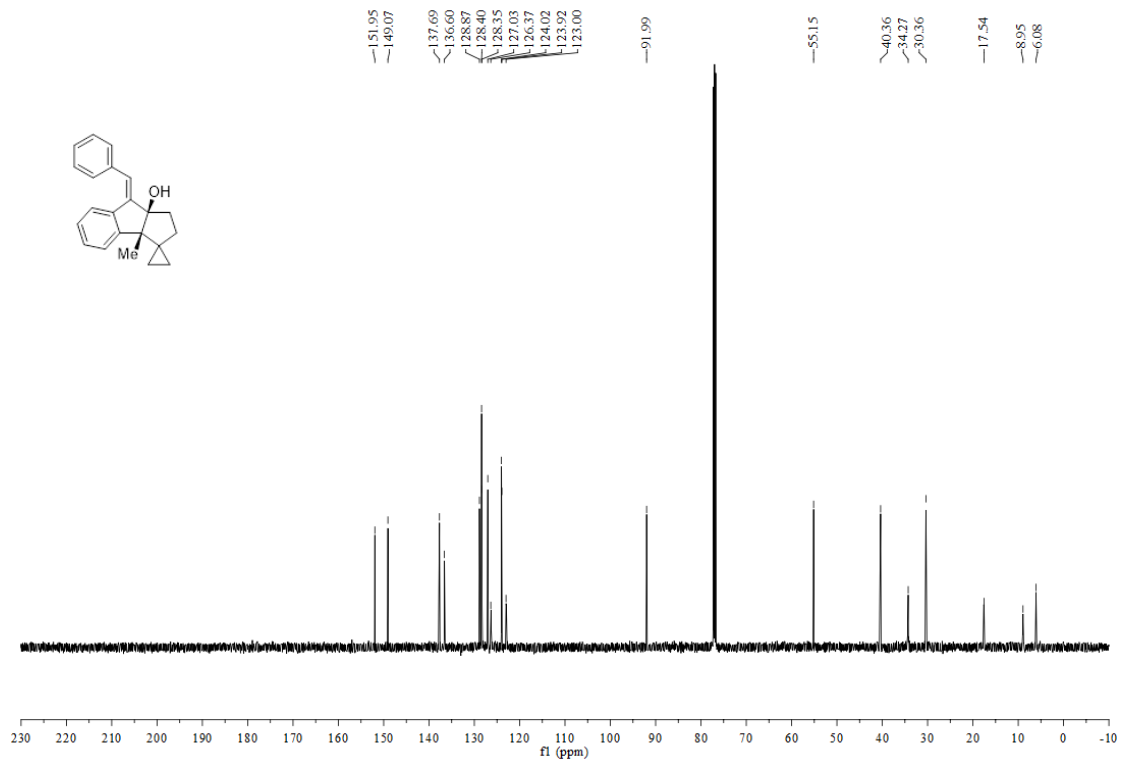

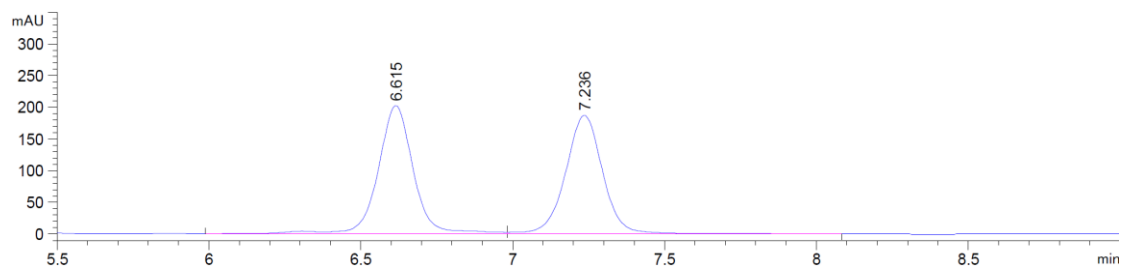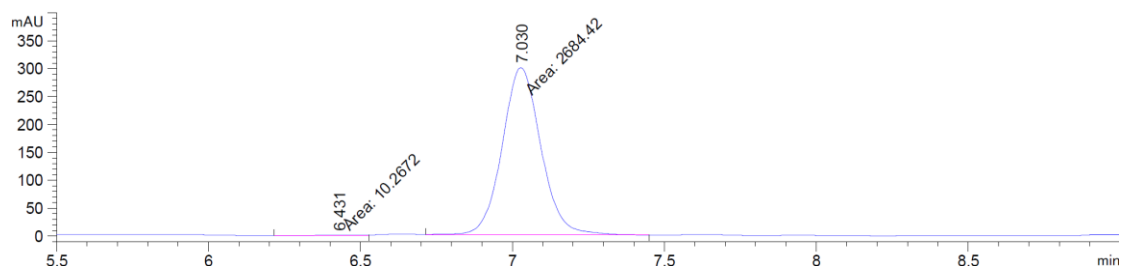

Signal 1: DAD1 A, Sig=254,4 Ref=360,100

| Peak # | RetTime [min] | Type | Width [min] | Area [mAU*s] | Height [mAU] | Area %  |
|--------|---------------|------|-------------|--------------|--------------|---------|
| 1      | 6.431         | MM   | 0.1464      | 10.26723     | 1.16881      | 0.3810  |
| 2      | 7.030         | MM   | 0.1489      | 2684.41919   | 300.44452    | 99.6190 |

#### 4.5 Condensation of **2a** with TsNHNH<sub>2</sub>

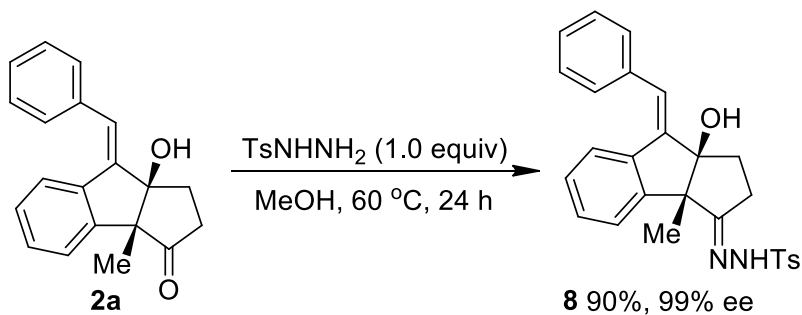

To a solution of **2a** (0.2 mmol) in MeOH was added *p*-toluenesulfonyl hydrazide (1.1 equiv). After stirring at 60 °C for 24 h, the resulting mixture was concentrated under reduced pressure. The crude was purified by chromatography on silica gel, eluting with ethyl acetate/petroleum ether 1:2 (v/v), to give compound **8**. White solid, Mp = 218-219 °C; 82 mg, 90% yield;  $[\alpha]_{\text{D}}^{20} = -221.0$  (*c* 1.5, CH<sub>2</sub>Cl<sub>2</sub>), 99% ee [Phenomenex Lux 5u Amylose-2 column (25 cm × 0.46 cm ID), *n*-hexane/*i*-PrOH = 80/20, 0.7 mL/min, 254 nm;  $t_{\text{minor}} = 22.1$  min,  $t_{\text{major}} = 26.3$  min]; <sup>1</sup>H NMR (500 MHz, (CD<sub>3</sub>)<sub>2</sub>SO) δ 10.07 (s, 1H), 7.83 (d, *J* = 8.0 Hz, 2H), 7.46 (d, *J* = 8.0 Hz, 2H), 7.38-7.36 (m, 4H), 7.30-7.26 (m, 1H), 7.11-7.10 (m, 1H), 7.00-6.96 (m, 2H), 6.75-6.71 (m, 2H), 5.51 (s, 1H), 2.48-2.39 (m, 5H), 1.99-1.95 (m, 1H), 1.62-1.60 (m, 1H), 1.14 (s, 3H). <sup>13</sup>C NMR (125 MHz,

(CD<sub>3</sub>)<sub>2</sub>SO)  $\delta$  168.8, 149.2, 146.4, 144.1, 138.0, 137.1, 136.3, 130.3, 129.4, 129.3, 129.0, 128.7, 128.1, 127.8, 124.9, 124.0, 90.5, 60.5, 37.5, 28.5, 22.0. HRMS  $m/z$  (ESI<sup>+</sup>): Calculated for C<sub>27</sub>H<sub>26</sub>N<sub>2</sub>NaO<sub>3</sub>S<sup>+</sup> ([M+Na]<sup>+</sup>) 481.1556, found 481.1556.

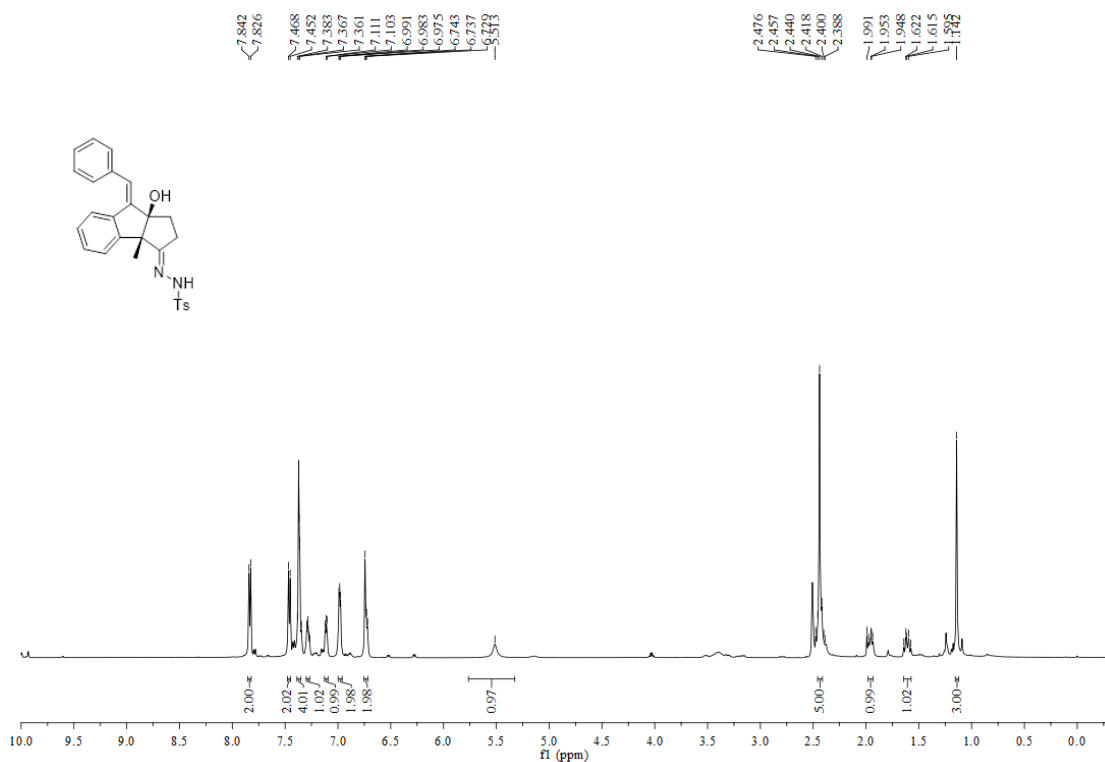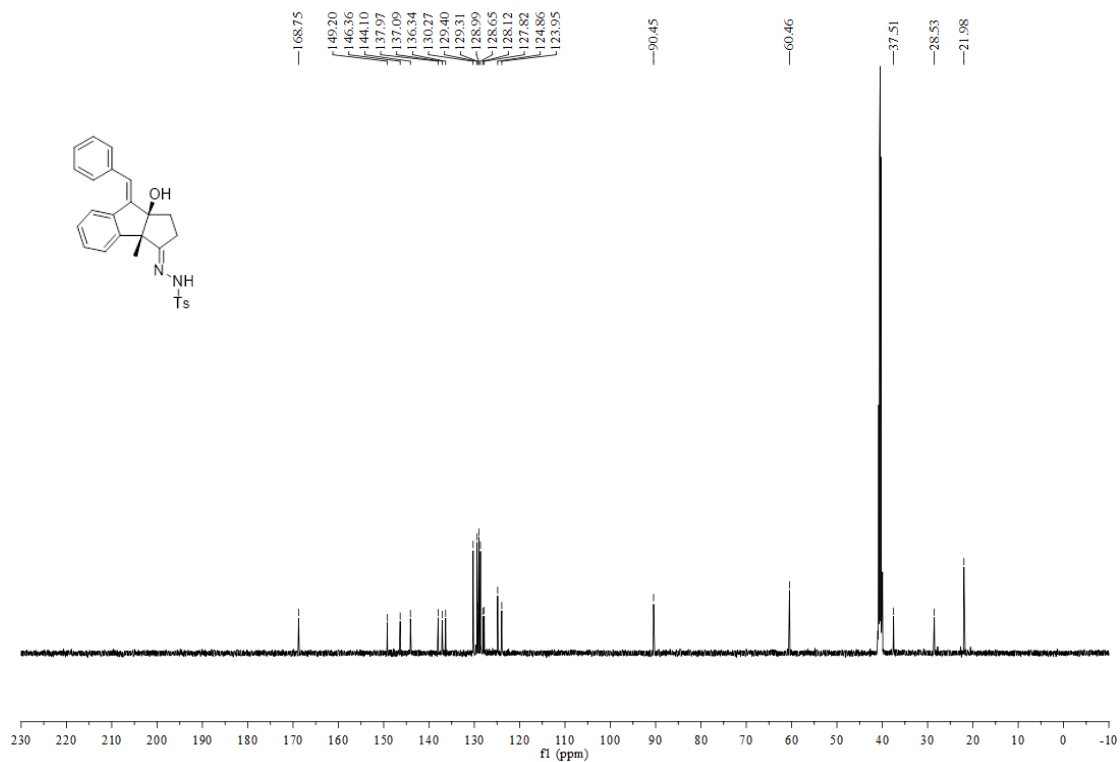



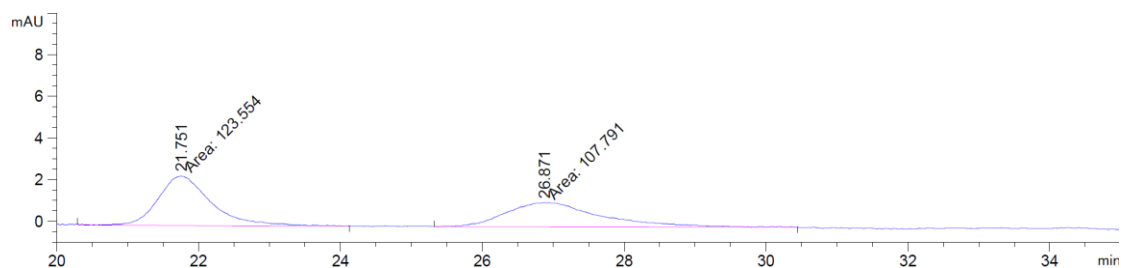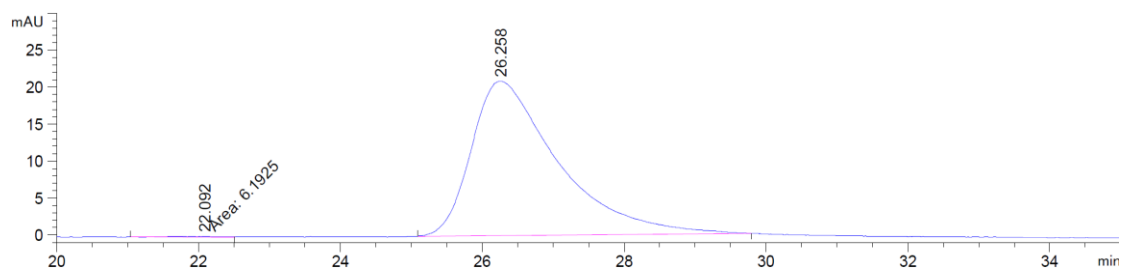

Signal 1: DAD1 A, Sig=254,4 Ref=360,100

| Peak # | RetTime [min] | Type | Width [min] | Area [mAU*s] | Height [mAU] | Area %  |
|--------|---------------|------|-------------|--------------|--------------|---------|
| 1      | 22.092        | MM   | 0.8968      | 6.19250      | 1.15081e-1   | 0.3496  |
| 2      | 26.258        | BB   | 1.0969      | 1765.03760   | 20.86504     | 99.6504 |

#### 4.6 Coupling of **8** with PhB(OH)<sub>2</sub>

The modified procedure according to the literature was followed.<sup>6</sup>

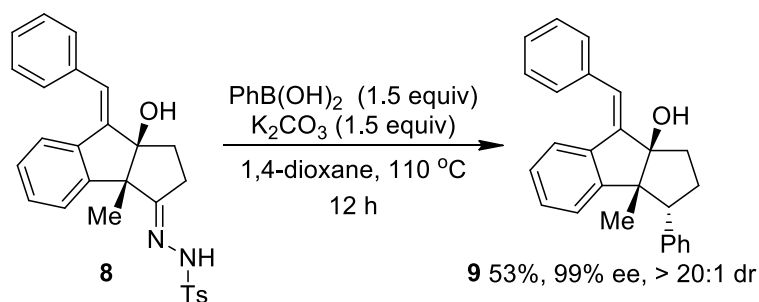

To a dried Schlenk flask was charged with **8** (0.2 mmol), K<sub>2</sub>CO<sub>3</sub> (1.5 equiv, 0.3 mmol), phenylboronic acid (1.5 equiv, 0.3 mmol), and anhydrous 1,4-dioxane (2 mL) under N<sub>2</sub> atmosphere. The mixture was stirred at 110 °C for 12 h. When the reaction was completed, the solution was concentrated under reduced pressure. The crude was purified by chromatography on silica gel, eluting with ethyl acetate/petroleum ether 1:3 (v/v), to give compound **9**; yellow oil; 37 mg, 53% yield;  $[\alpha]_{\text{D}}^{20} = -153.3$  (*c* 0.5, CH<sub>2</sub>Cl<sub>2</sub>), 99% ee [Phenomenex Lux 5u Amylose-2 column (25 cm × 0.46 cm ID), *n*-hexane/*i*-PrOH = 90/10, 0.7 mL/min, 254 nm;  $t_{\text{minor}} = 6.8$  min,  $t_{\text{major}} = 7.7$  min]; <sup>1</sup>H NMR (500

MHz, CDCl<sub>3</sub>)  $\delta$  7.42 (d,  $J = 7.0$  Hz, 2H), 7.37 (t,  $J = 7.5$  Hz, 2H), 7.29 (t,  $J = 7.3$  Hz, 1H), 7.24 (d,  $J = 3.0$  Hz, 3H), 7.19 (d,  $J = 8.0$  Hz, 1H), 7.00-6.98 (m, 2H), 6.96 (s, 1H), 6.88-6.85 (m, 1H), 6.82-6.79 (m, 1H), 5.89 (d,  $J = 7.5$  Hz, 1H), 3.22 (dd,  $J = 13.0, 5.5$  Hz, 1H), 2.38 (dd,  $J = 12.5, 6.0$  Hz, 1H), 2.18-2.11 (m, 1H), 1.89 (s, 1H), 1.84-1.79 (m, 1H), 1.60-1.56 (m, 1H), 1.39 (s, 3H). <sup>13</sup>C NMR (125 MHz, CDCl<sub>3</sub>)  $\delta$  149.7, 148.3, 140.6, 137.8, 137.4, 129.1, 128.5, 128.4, 127.9, 127.7, 127.2, 126.6, 126.5, 126.4, 123.7, 123.2, 90.6, 57.9, 56.0, 41.0, 27.8, 22.9. HRMS  $m/z$  (ESI<sup>+</sup>): Calculated for C<sub>26</sub>H<sub>24</sub>ONa<sup>+</sup> ([M+Na]<sup>+</sup>) 375.1719, found 375.1718.

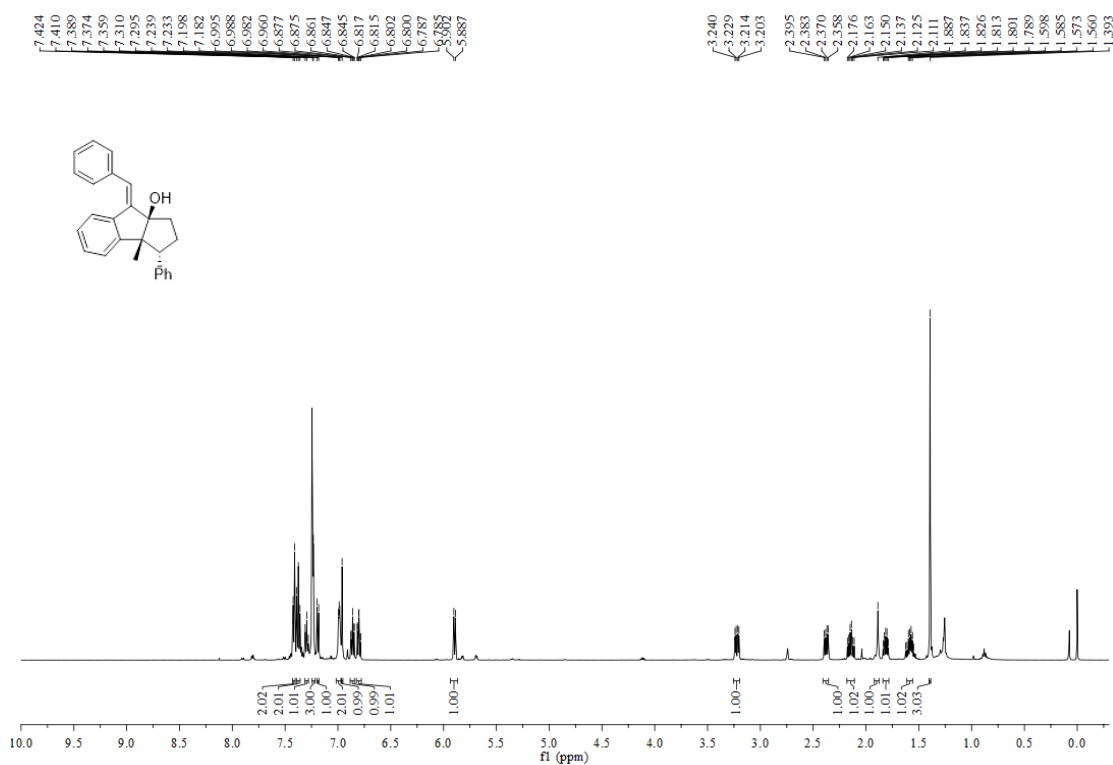

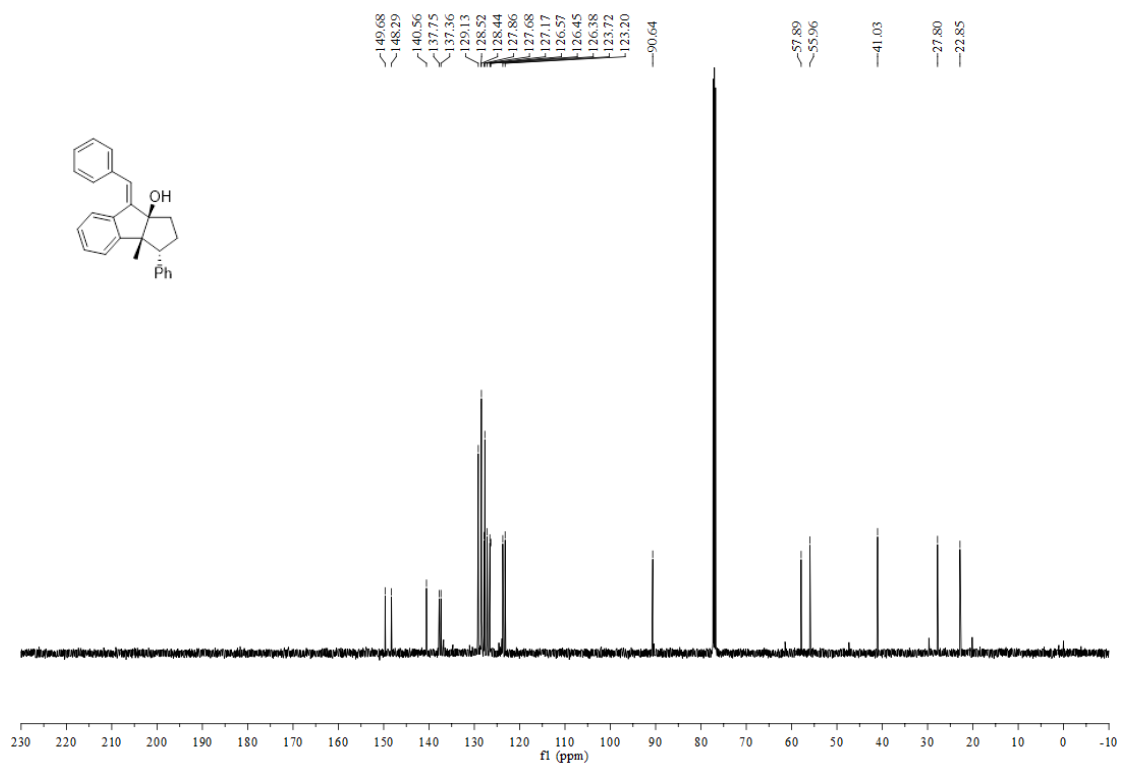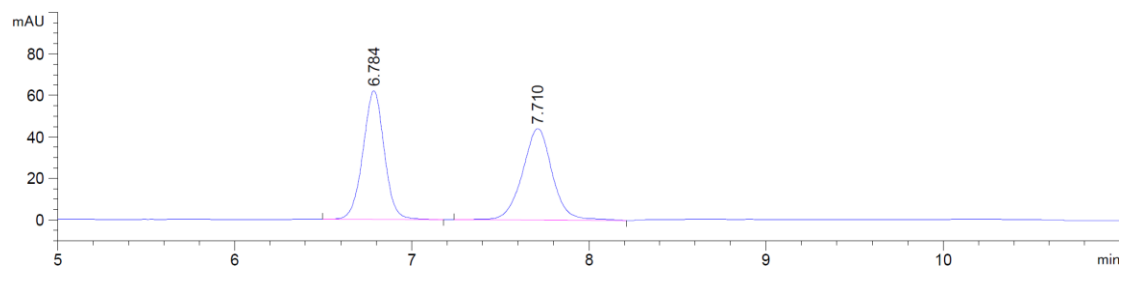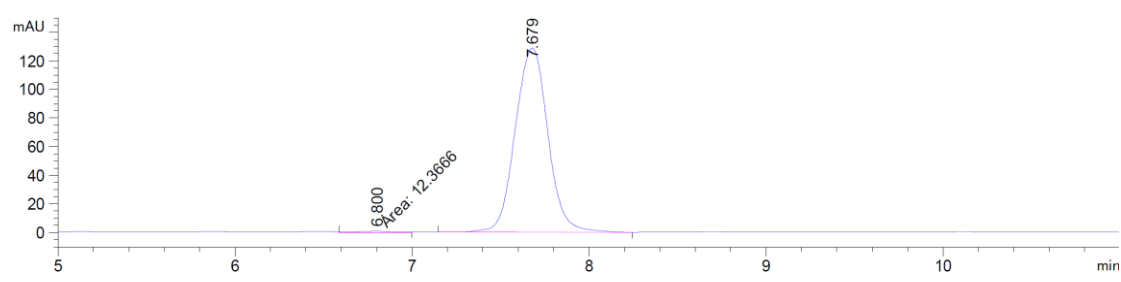

Signal 1: DAD1 A, Sig=254,4 Ref=360,100

| Peak # | RetTime [min] | Type | Width [min] | Area [mAU*s] | Height [mAU] | Area %  |
|--------|---------------|------|-------------|--------------|--------------|---------|
| 1      | 6.800         | MM   | 0.2278      | 12.36664     | 9.04759e-1   | 0.7411  |
| 2      | 7.679         | BB   | 0.2041      | 1656.31726   | 128.78018    | 99.2589 |

## 2d-NOESY spectrum of 9

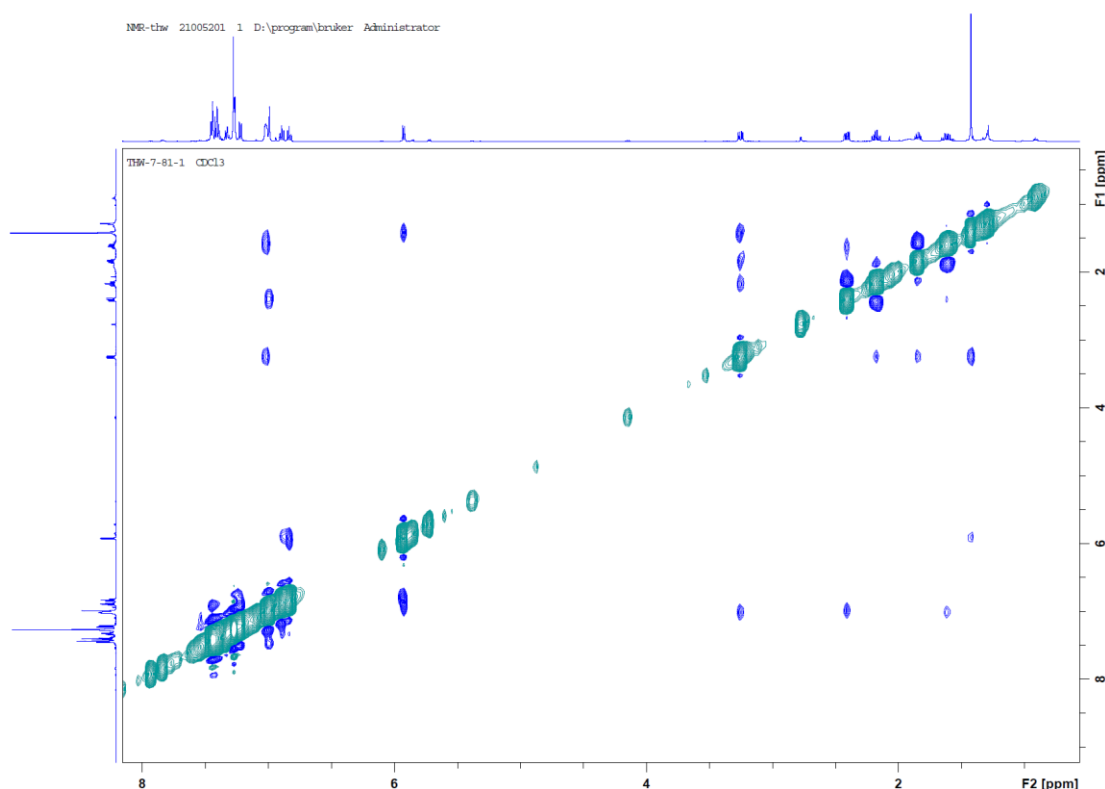

## 4.7 Reduction of 2a

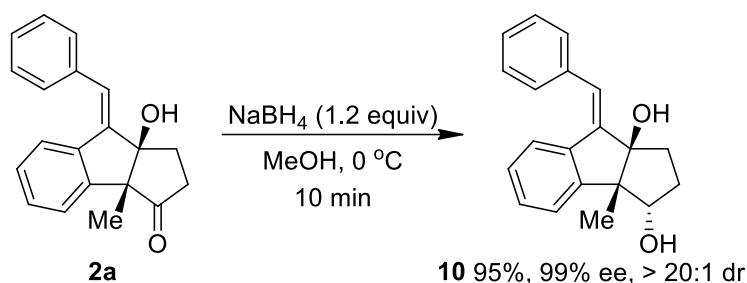

To a solution of **2a** (0.2 mmol) in MeOH (5 mL) was added NaBH<sub>4</sub> (1.2 equiv, 0.24 mmol) at 0 °C in portions. The resulting mixture was stirred for 10 min. The reaction was then quenched with a saturated aq. NH<sub>4</sub>Cl (5 mL). The solution was extracted with ethyl acetate (2 mL×3), dried over Na<sub>2</sub>SO<sub>4</sub>, and concentrated under reduced pressure. The crude was purified by chromatography on silica gel, eluting with ethyl acetate/petroleum ether 1:3 (v/v), to afford compound **10**. White solid, Mp = 73-74 °C; 56 mg, 95% yield;  $[\alpha]_D^{20} = -26.0$  (*c* 0.5, CH<sub>2</sub>Cl<sub>2</sub>), 99% ee [Phenomenex Lux 5u Amylose-2 column (25 cm × 0.46 cm ID), *n*-hexane/*i*-PrOH = 80/20, 0.7 mL/min, 254 nm; *t*<sub>minor</sub> = 6.5 min, *t*<sub>major</sub> = 8.4 min]; <sup>1</sup>H NMR (500 MHz, CDCl<sub>3</sub>) δ 7.38-7.34 (m, 5H), 7.31-7.27 (m, 1H), 7.25-7.20 (m, 2H), 7.01-6.98 (m, 1H), 6.88 (s, 1H), 4.06-4.02 (m, 1H), 2.17-2.13 (m, 1H), 1.96-1.91 (m, 3H), 1.57 (s, 1H), 1.36 (s, 3H), 1.10-1.02 (m, 1H). <sup>13</sup>C NMR (125 MHz, CDCl<sub>3</sub>) δ 149.6, 147.1, 137.8, 137.4, 128.9, 128.5, 128.3, 127.2, 127.0, 126.1, 123.9, 88.8, 80.5, 56.8, 37.5, 31.7, 20.9. HRMS *m/z* (ESI<sup>+</sup>):

Calculated  $C_{20}H_{20}O_2Na^+$  ( $[M+Na]^+$ ) 315.1356, found 315.1357.

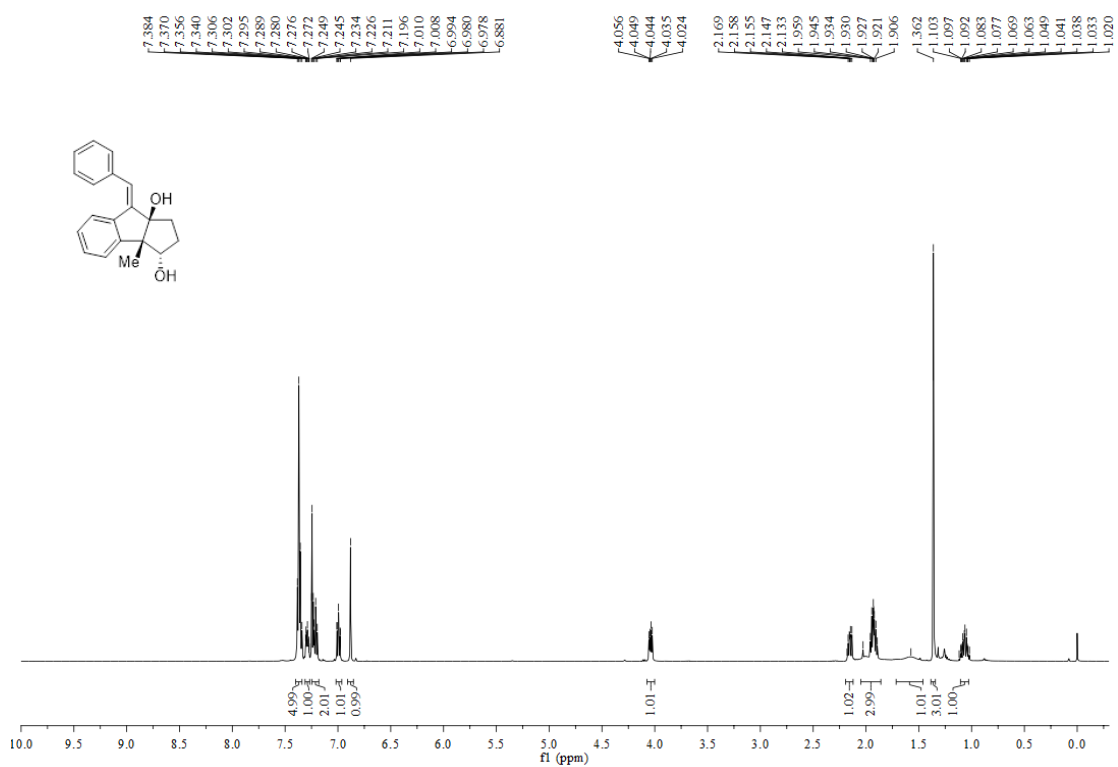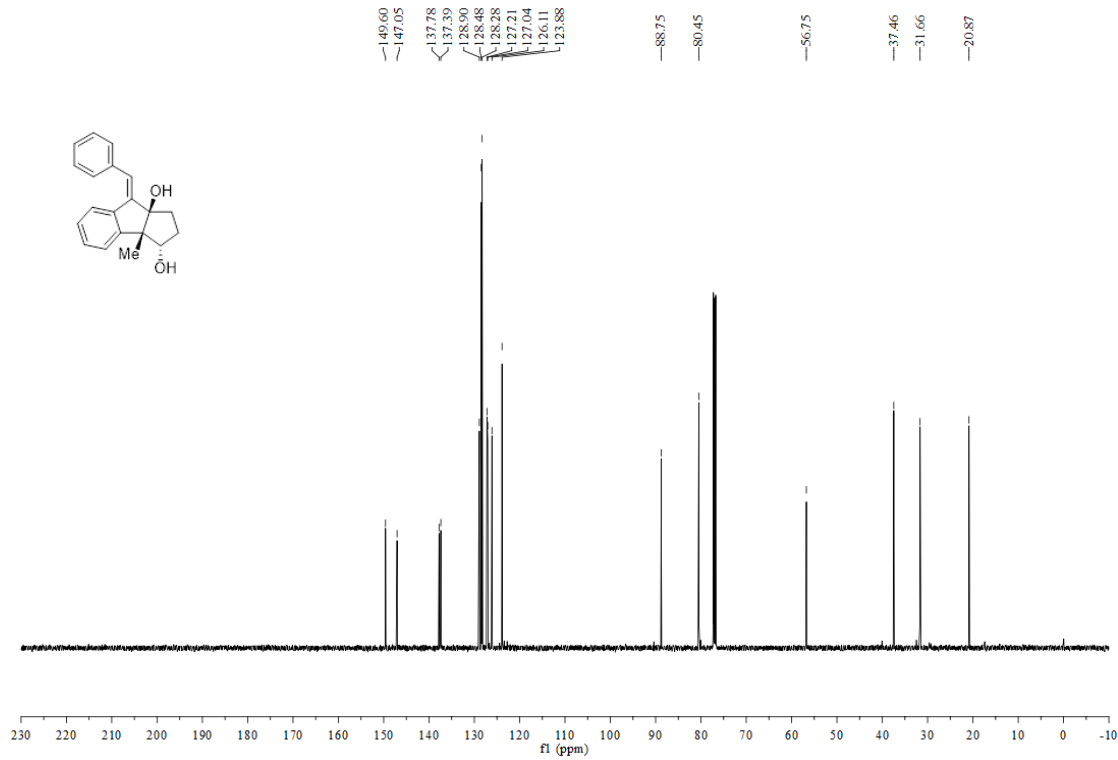

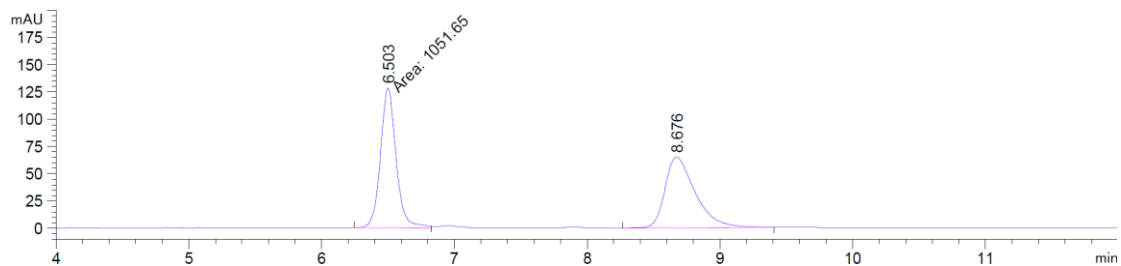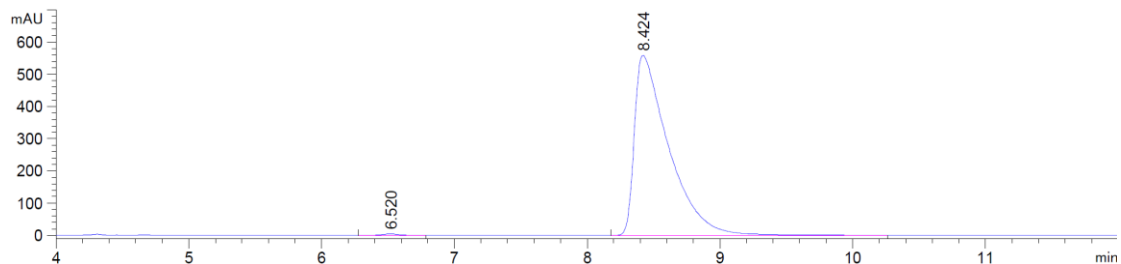

Signal 1: DAD1 A, Sig=254,4 Ref=360,100

| Peak # | RetTime [min] | Type | Width [min] | Area [mAU*s] | Height [mAU] | Area %  |
|--------|---------------|------|-------------|--------------|--------------|---------|
| 1      | 6.520         | BB   | 0.1260      | 37.36382     | 4.44659      | 0.3710  |
| 2      | 8.424         | BB   | 0.2574      | 1.00332e4    | 558.94476    | 99.6290 |

## 2d-NOESY spectrum of 10

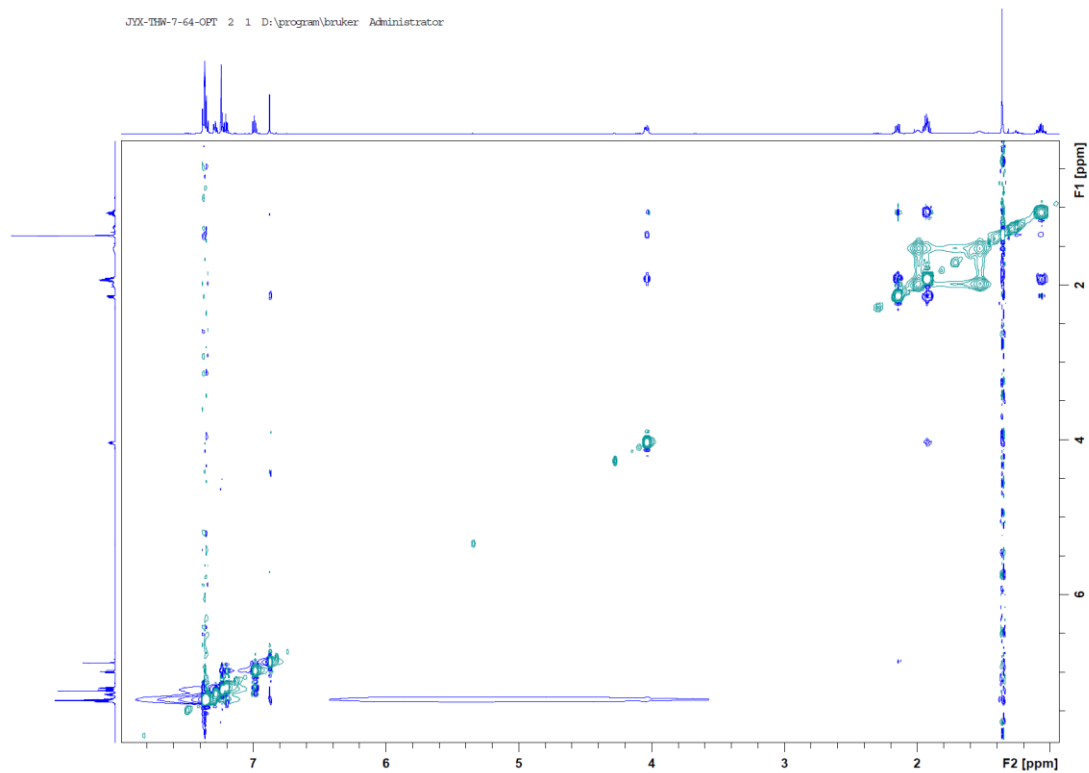



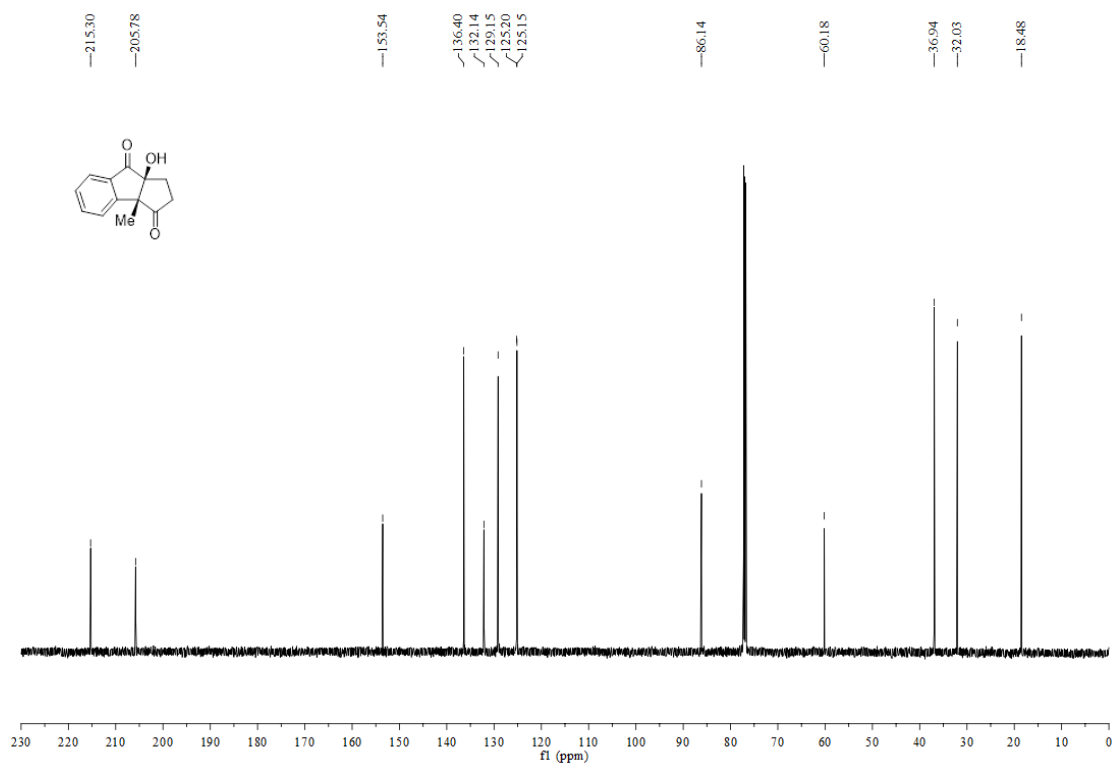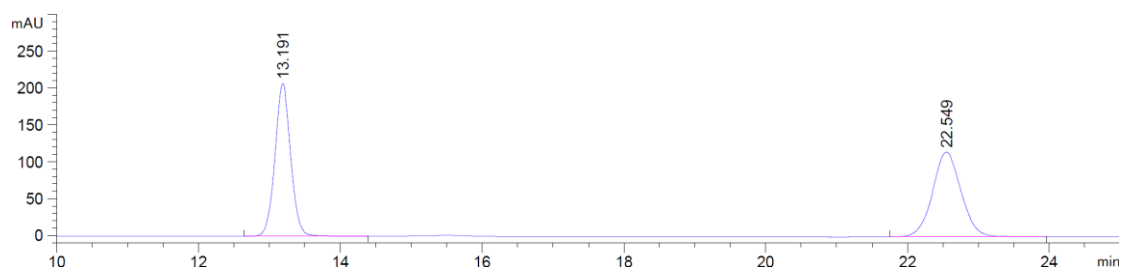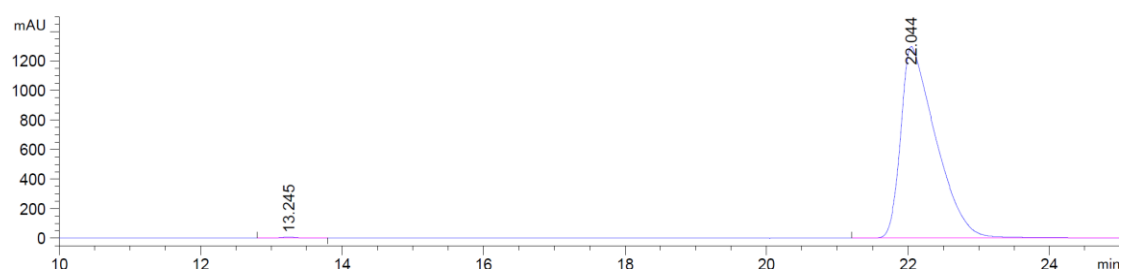

Signal 1: DAD1 A, Sig=254,4 Ref=360,100

| Peak # | RetTime [min] | Type | Width [min] | Area [mAU*s] | Height [mAU] | Area %  |
|--------|---------------|------|-------------|--------------|--------------|---------|
| 1      | 13.245        | BB   | 0.2361      | 131.38722    | 8.51215      | 0.2938  |
| 2      | 22.044        | BBA  | 0.4990      | 4.45945e4    | 1297.51660   | 99.7062 |



## 4.9 Baeyer-Villiger reaction of **11**

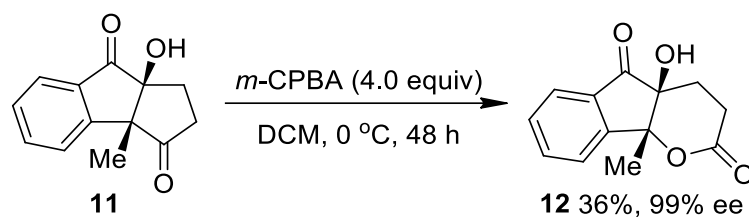

To a solution of **11** (0.2 mmol) in anhydrous DCM was added *m*-CPBA (0.8 mmol, 4.0 equiv) at 0 °C in one portion. The resulting mixture was stirred at the same temperature for 48 h and then quenched with a solution of Na<sub>2</sub>SO<sub>3</sub>. After extracting with DCM, the combined organic phase was washed with saturated aqueous NaHCO<sub>3</sub> and brine, dried over Na<sub>2</sub>SO<sub>4</sub>, and concentrated under reduced pressure. The residue was purified by chromatography on silica gel, eluting with ethyl acetate/petroleum ether 1:3 (v/v), to give compound **12**. Colorless oil; 17 mg, 36% yield;  $[\alpha]_{\text{D}}^{20} = -5.9$  (*c* 0.28, CH<sub>2</sub>Cl<sub>2</sub>), 99% ee [Phenomenex Lux 5u Amylose-2 column (25 cm × 0.46 cm ID), *n*-hexane/*i*-PrOH = 80/20, 0.7 mL/min, 254 nm;  $t_{\text{minor}} = 16.7$  min,  $t_{\text{major}} = 22.5$  min]; <sup>1</sup>H NMR (500 MHz, CDCl<sub>3</sub>)  $\delta$  7.84-7.79 (m, 3H), 7.60-7.57 (m, 1H), 3.13 (s, 1H), 2.78-2.72 (m, 1H), 2.24-2.18 (m, 1H), 2.09-2.04 (m, 1H), 2.00-1.95 (m, 1H), 1.65 (s, 3H). <sup>13</sup>C NMR (125 MHz, CDCl<sub>3</sub>)  $\delta$  202.3, 170.3, 154.1, 137.1, 131.2, 130.5, 124.7, 124.1, 87.3, 79.0, 30.9, 26.3, 25.9. HRMS *m/z* (ESI<sup>+</sup>): Calculated for C<sub>13</sub>H<sub>12</sub>O<sub>4</sub>Na<sup>+</sup> ([M+Na]<sup>+</sup>) 255.0628, found 255.0628.

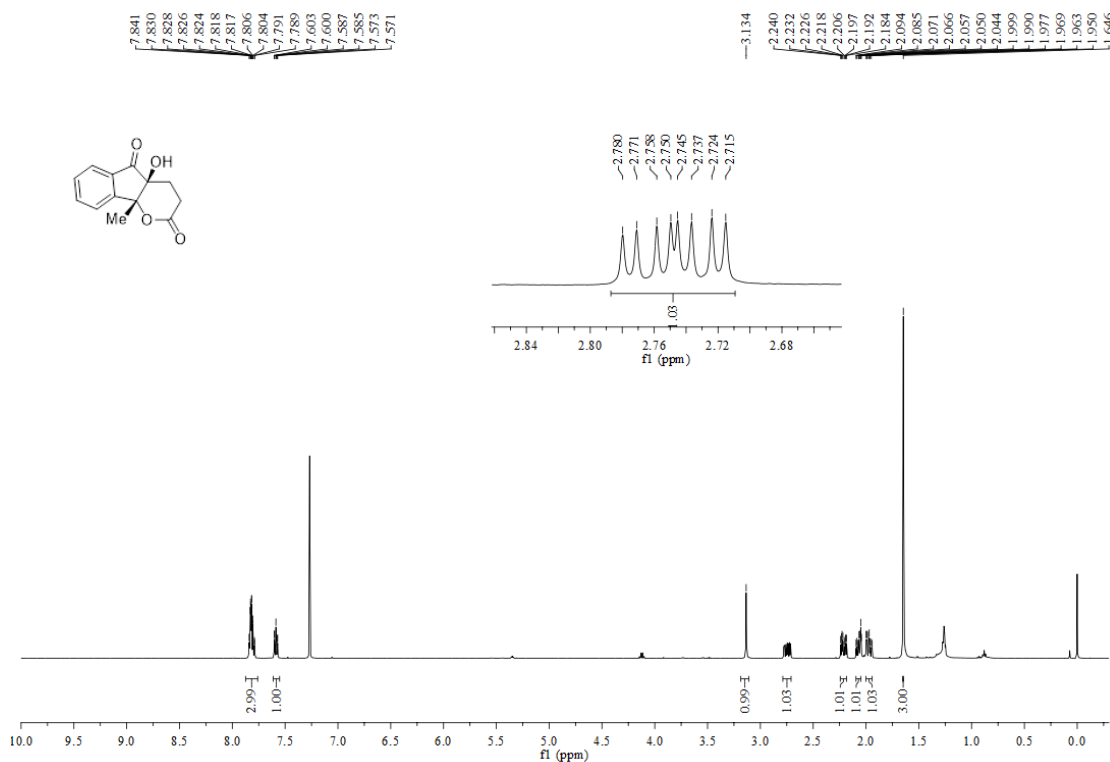

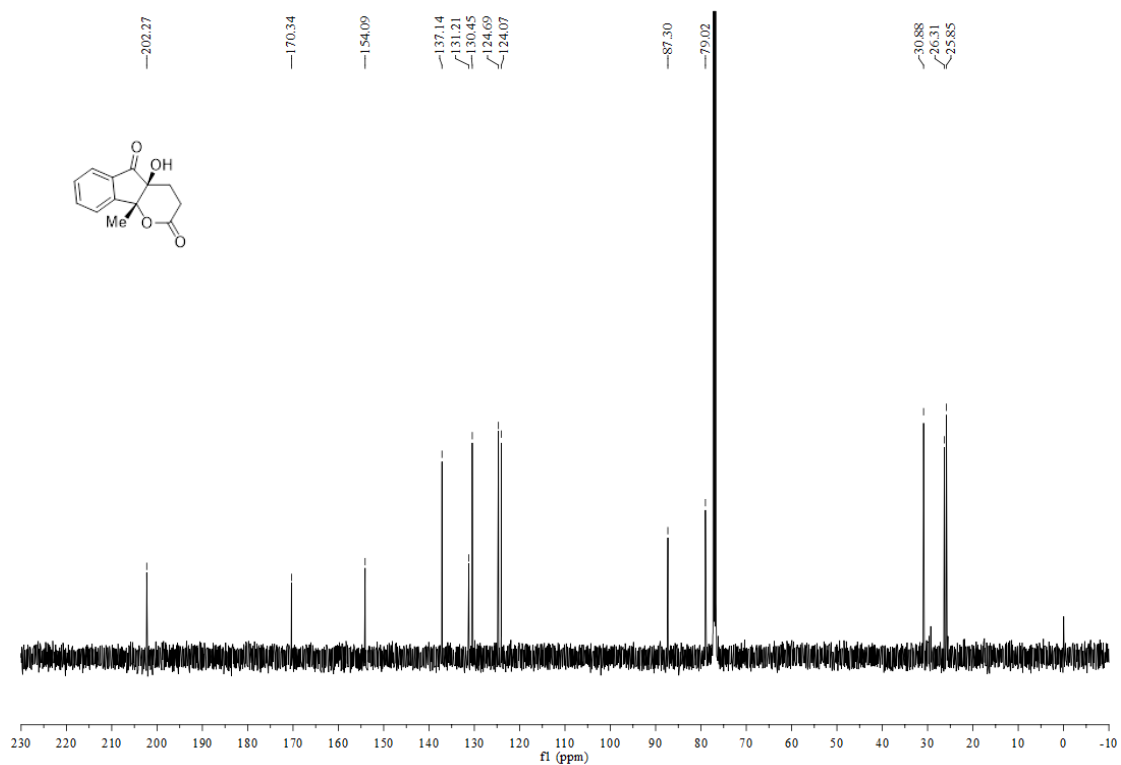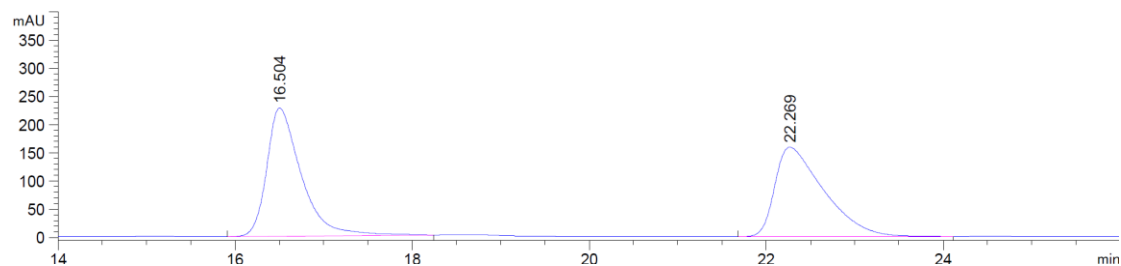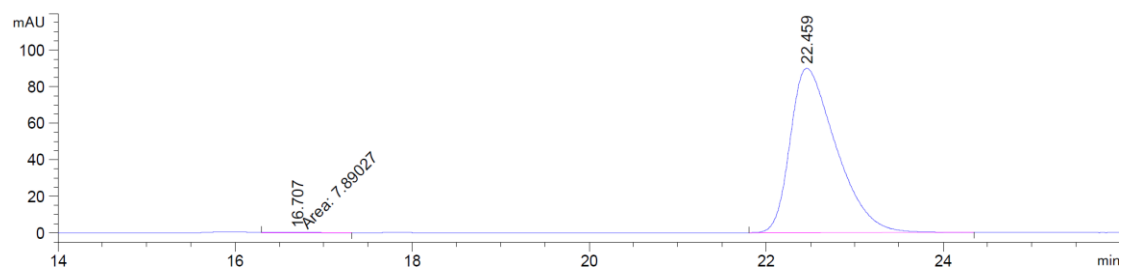

Signal 1: DAD1 A, Sig=254,4 Ref=360,100

| Peak # | RetTime [min] | Type | Width [min] | Area [mAU*s] | Height [mAU] | Area %  |
|--------|---------------|------|-------------|--------------|--------------|---------|
| 1      | 16.707        | MM   | 0.7093      | 7.89027      | 1.85409e-1   | 0.2427  |
| 2      | 22.459        | BB   | 0.5425      | 3243.33130   | 89.98299     | 99.7573 |

## 5. Control experiment and formation of by-product 3

### 5.1 Control experiments

The complex of  $\text{CoH}(\text{dppbz})_2$  was prepared according to the known procedure.<sup>1a</sup>

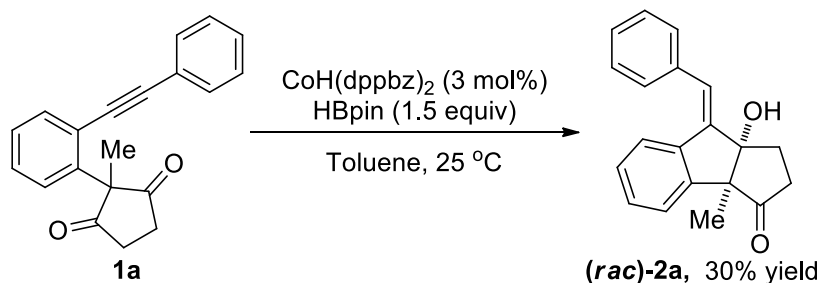

To a dried 25 mL Schlenk tube was charged with **1a** (0.2 mmol),  $\text{CoH}(\text{dppbz})_2$  (3 mol%, 0.006 mmol), and HBpin (1.5 equiv, 0.3 mmol) under  $\text{N}_2$  atmosphere. Toluene (2 mL) was then introduced via a syringe. The resulting mixture was stirred at room temperature for 6 days. The reaction mixture was concentrated under reduced pressure, and the residue was purified by chromatography on silica gel, eluting with ethyl acetate/petroleum ether 1:5 (v/v), to give **(rac)-2a** in 30% yield.

### 5.2 Formation of byproduct 3

#### *3-Hydroxy-2-methyl-2-(2-(phenylethynyl)phenyl)cyclopentan-1-one (3)*

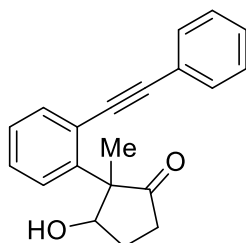

$^1\text{H}$  NMR (500 MHz,  $\text{CDCl}_3$ )  $\delta$  7.60 (t,  $J = 7.5$  Hz, 2H), 7.51 (dd,  $J = 6.5, 2.5$  Hz, 2H), 7.39-7.36 (m, 3H), 7.35-7.31 (m, 1H), 7.27 (d,  $J = 15.7$  Hz, 1H), 4.91 (d,  $J = 3.5$  Hz, 1H), 2.76-2.70 (m, 1H), 2.48 (dd,  $J = 18.5, 7.5$  Hz, 1H), 2.26-2.23 (m, 1H), 2.18-2.13 (m, 1H), 1.80 (s, 1H), 1.62 (s, 3H).  $^{13}\text{C}$  NMR (125 MHz,  $\text{CDCl}_3$ )  $\delta$  218.6, 140.3, 134.8, 131.1, 129.0, 128.8, 128.7, 128.5, 127.1, 122.8, 122.1, 94.5, 89.5, 77.9, 59.6, 35.6, 27.3, 22.1. HRMS  $m/z$  (ESI<sup>+</sup>): Calculated for  $\text{C}_{20}\text{H}_{18}\text{NaO}_2^+$  ( $[\text{M}+\text{Na}]^+$ ) 313.1200, found 313.1199.

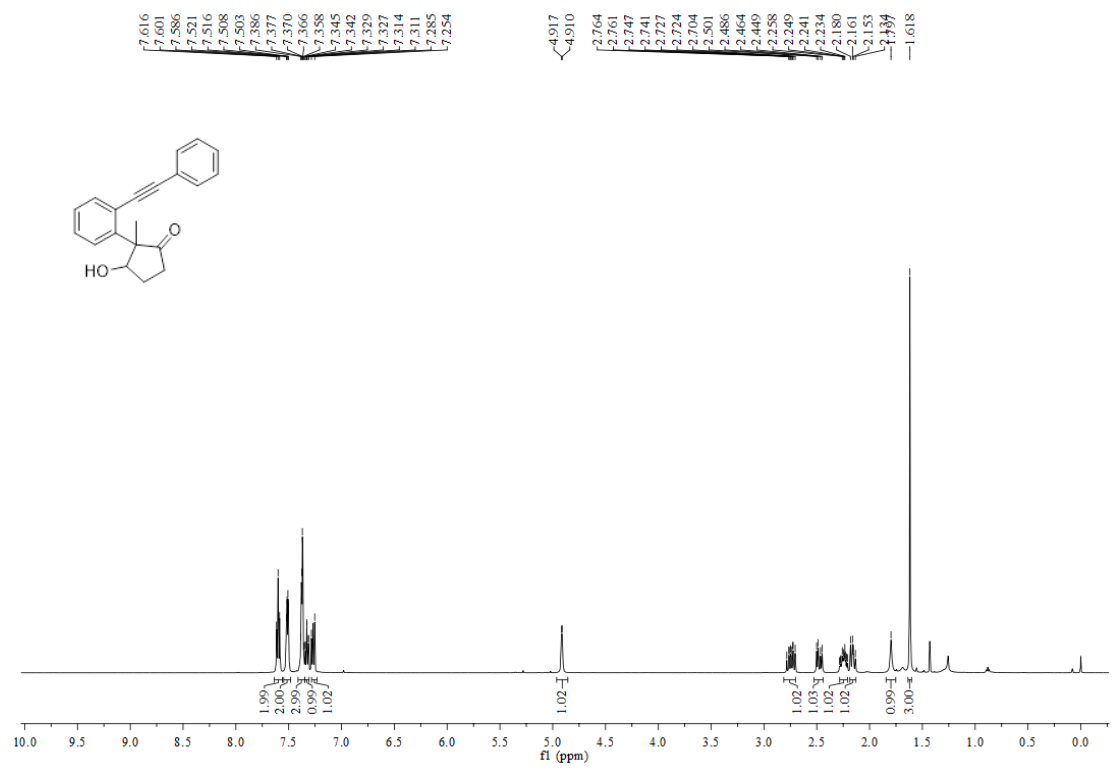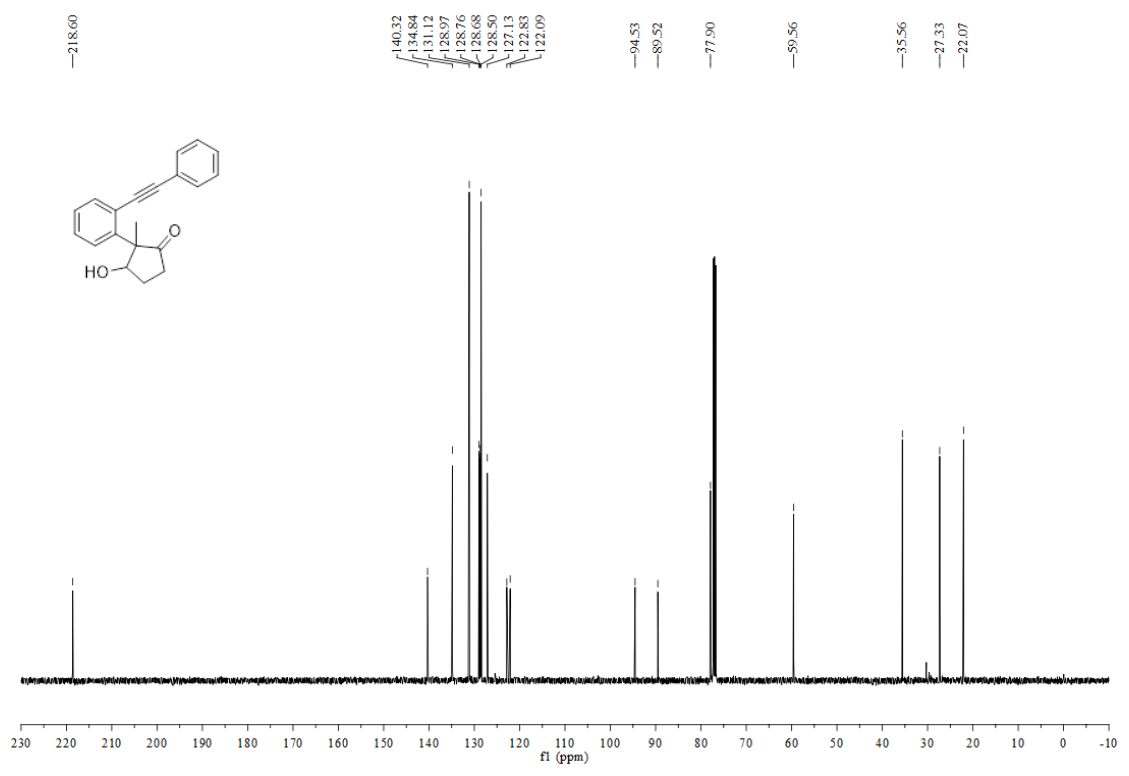

## 6. Crystal report of compound 2n

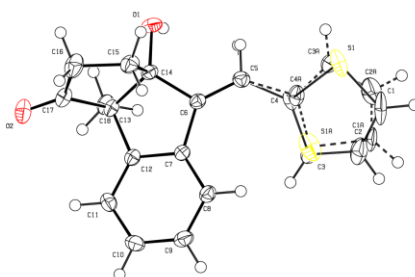

### checkCIF/PLATON report

Structure factors have been supplied for datablock(s) 200730\_thw\_p22\_0m

THIS REPORT IS FOR GUIDANCE ONLY. IF USED AS PART OF A REVIEW PROCEDURE FOR PUBLICATION, IT SHOULD NOT REPLACE THE EXPERTISE OF AN EXPERIENCED CRYSTALLOGRAPHIC REFEREE.

No syntax errors found.    CIF dictionary    Interpreting this report

### Datablock: 200730\_thw\_p22\_0m

---

Bond precision:    C-C = 0.0021 Å                      Wavelength=0.71073  
Cell:                      a=7.349 (2)              b=11.275 (3)              c=17.533 (4)  
                                    alpha=90                      beta=90                      gamma=90  
Temperature:              170 K

|                        | Calculated   | Reported     |
|------------------------|--------------|--------------|
| Volume                 | 1452.8 (6)   | 1452.8 (6)   |
| Space group            | P 21 21 21   | P 21 21 21   |
| Hall group             | P 2ac 2ab    | P 2ac 2ab    |
| Moiety formula         | C18 H16 O2 S | C18 H16 O2 S |
| Sum formula            | C18 H16 O2 S | C18 H16 O2 S |
| Mr                     | 296.37       | 296.37       |
| Dx, g cm <sup>-3</sup> | 1.355        | 1.355        |
| Z                      | 4            | 4            |
| Mu (mm <sup>-1</sup> ) | 0.224        | 0.224        |
| F000                   | 624.0        | 624.0        |
| F000'                  | 624.75       |              |
| h, k, lmax             | 9, 14, 22    | 9, 14, 22    |
| Nref                   | 3192 [ 1849] | 3192         |
| Tmin, Tmax             | 0.910, 0.937 | 0.708, 0.746 |
| Tmin'                  | 0.898        |              |

Correction method= # Reported T Limits: Tmin=0.708 Tmax=0.746  
AbsCorr = MULTI-SCAN

Data completeness= 1.73/1.00                      Theta(max)= 27.036

R(reflections)= 0.0280 ( 3144)                      wr2(reflections)= 0.0748 ( 3192)

S = 1.086                                              Npar= 232

---

The following ALERTS were generated. Each ALERT has the format  
**test-name ALERT alert-type alert-level**.  
Click on the hyperlinks for more details of the test.

---

**Alert level G**

|                   |                                                  |     |        |
|-------------------|--------------------------------------------------|-----|--------|
| PLAT003_ALERT_2_G | Number of Uiso or Uij Restrained non-H Atoms ... | 11  | Report |
| PLAT007_ALERT_5_G | Number of Unrefined Donor-H Atoms .....          | 1   | Report |
| PLAT171_ALERT_4_G | The CIF-Embedded .res File Contains EADP Records | 1   | Report |
| PLAT178_ALERT_4_G | The CIF-Embedded .res File Contains SIMU Records | 1   | Report |
| PLAT230_ALERT_2_G | Hirshfeld Test Diff for S1 --C4 .                | 5.3 | s.u.   |
| PLAT301_ALERT_3_G | Main Residue Disorder .....(Resd 1 )             | 24% | Note   |
| PLAT720_ALERT_4_G | Number of Unusual/Non-Standard Labels .....      | 1   | Note   |
| PLAT791_ALERT_4_G | Model has Chirality at C13 (Sohnke SpGr)         | R   | Verify |
| PLAT791_ALERT_4_G | Model has Chirality at C14 (Sohnke SpGr)         | R   | Verify |
| PLAT860_ALERT_3_G | Number of Least-Squares Restraints .....         | 132 | Note   |
| PLAT910_ALERT_3_G | Missing # of FCF Reflection(s) Below Theta(Min). | 1   | Note   |
| PLAT978_ALERT_2_G | Number C-C Bonds with Positive Residual Density. | 7   | Info   |

---

- 0 **ALERT level A** = Most likely a serious problem - resolve or explain
  - 0 **ALERT level B** = A potentially serious problem, consider carefully
  - 0 **ALERT level C** = Check. Ensure it is not caused by an omission or oversight
  - 12 **ALERT level G** = General information/check it is not something unexpected
- 
- 0 ALERT type 1 CIF construction/syntax error, inconsistent or missing data
  - 3 ALERT type 2 Indicator that the structure model may be wrong or deficient
  - 3 ALERT type 3 Indicator that the structure quality may be low
  - 5 ALERT type 4 Improvement, methodology, query or suggestion
  - 1 ALERT type 5 Informative message, check
- 

It is advisable to attempt to resolve as many as possible of the alerts in all categories. Often the minor alerts point to easily fixed oversights, errors and omissions in your CIF or refinement strategy, so attention to these fine details can be worthwhile. In order to resolve some of the more serious problems it may be necessary to carry out additional measurements or structure refinements. However, the purpose of your study may justify the reported deviations and the more serious of these should normally be commented upon in the discussion or experimental section of a paper or in the "special\_details" fields of the CIF. checkCIF was carefully designed to identify outliers and unusual parameters, but every test has its limitations and alerts that are not important in a particular case may appear. Conversely, the absence of alerts does not guarantee there are no aspects of the results needing attention. It is up to the individual to critically assess their own results and, if necessary, seek expert advice.

#### Publication of your CIF in IUCr journals

A basic structural check has been run on your CIF. These basic checks will be run on all CIFs submitted for publication in IUCr journals (*Acta Crystallographica*, *Journal of Applied Crystallography*, *Journal of Synchrotron Radiation*); however, if you intend to submit to *Acta Crystallographica Section C* or *E* or *IUCrData*, you should make sure that full publication checks are run on the final version of your CIF prior to submission.

#### Publication of your CIF in other journals

Please refer to the *Notes for Authors* of the relevant journal for any special instructions relating to CIF submission.

---

PLATON version of 16/07/2020; check.def file version of 12/07/2020

## 7. References

- [1] (a) S. Yu, C. Wu and S. Ge, *J. Am. Chem. Soc.*, 2017, **139**, 6526–6529; (b) C. Wu, J. Liao and S. Ge, *Angew. Chem. Int. Ed.*, 2019, **58**, 8882–8886; (c) Z. Ding, Y. Wang, W. Liu, Y. Chen and W. Kong, *J. Am. Chem. Soc.*, 2021, **143**, 53–59.
- [2] A. A. Zagulyaeva, M. S. Yusubov, V. V. Zhdankin, *J. Org. Chem.*, 2010, **75**, 2119–2122.
- [3] Y. Wu, I. Arenas, L. M. Broomfield, E. Martin and A. Shafir, *Chem. Eur. J.*, 2015, **21**, 18779–18784.
- [4] S. Cai, K. Yang and D.-Z. Wang, *Org. Lett.*, 2014, **16**, 2606–2609.
- [5] A. S. Kumar, G. Thirupathi, G. S. Reddy and D. B. Ramachary, *Chem. Eur. J.*, 2019, **25**, 1177–1183.
- [6] J. Barluenga, M. Tomás-Gamasa, F. Aznar and C. Valdés, *Nat. Chem.*, 2009, **1**, 494–499.
